# Supplementary material for: Proteomic signature profiling in the cortex of dairy cattle unravels the physiology of brain aging
Source: Front Aging Neurosci. 2023 Dec 7;15:1277546. doi: 10.3389/fnagi.2023.1277546 (PMC10733460; doi:10.3389/fnagi.2023.1277546)
Supplement: Supplementary file 1 [file Table_2.XLSX]

## Sheet: Table S2
Table S2. Proteins validated by MRM approach. The gene name, the peptide sequence, the monitored precursors and product ions, the collision energy and cone voltage for the fragmentation, the ion name, the calculated fold changes, and the p-value of the targeted analysis are reported for each protein. Fold change untargeted and targeted are referred to the differential proteomics and MRM analysis,…
gene.name	peptide.seq	precursor.mz	product.mz	collision_energy	cone_voltage	ion_name	Fold change (FC) untargeted	Fold change (FC) targeted	p-value targeted analysis
Actin (internal reference)	DSYVGDEAQSK	599.765	833.4	21	35	y8
	DSYVGDEAQSK	599.765	734.332	21	35	y7
	DSYVGDEAQSK	599.765	677.31	21	35	y6
	VAPEEHPVLLTEAPLNPK	977.536	1291.76	35	35	y12
	VAPEEHPVLLTEAPLNPK	977.536	1194.71	35	35	y11
	VAPEEHPVLLTEAPLNPK	977.536	1095.64	35	35	y10
	VAPEEHPVLLTEAPLNPK	977.536	982.557	35	35	y9
	VAPEEHPVLLTEAPLNPK	977.536	568.345	35	35	y5
	SYELPDGQVITIGNER	895.95	1298.67	32	35	y12
	SYELPDGQVITIGNER	895.95	1086.59	32	35	y10
	SYELPDGQVITIGNER	895.95	1029.57	32	35	y9
	SYELPDGQVITIGNER	895.95	901.51	32	35	y8
NDUFB4	LAIR	236.666	359.24	8	35	y3	0.7	0.6297	0.0026
	LAIR	236.666	288.203	8	35	y2
	EYQLQYYDPSR	731.336	1041.5	26	35	y8
	EYQLQYYDPSR	731.336	928.416	26	35	y7
	EYQLQYYDPSR	731.336	800.357	26	35	y6
	GVIEDPALVR	534.806	799.431	19	35	y7
	GVIEDPALVR	534.806	670.388	19	35	y6
	GVIEDPALVR	534.806	555.361	19	35	y5
	WTYAR	348.677	510.267	12	35	y4
	WTYAR	348.677	409.219	12	35	y3
	LIQEGK	344.205	574.32	12	35	y5
	LIQEGK	344.205	461.235	12	35	y4
NDUFB9	ATQLLR	351.219	630.393	12	35	y5	0.7	0.6664	0.0301
	ATQLLR	351.219	529.346	12	35	y4
	ATQLLR	351.219	401.287	12	35	y3
	TEALPPAR	427.74	624.383	15	35	y6
	TEALPPAR	427.74	553.346	15	35	y5
	TEALPPAR	427.74	440.262	15	35	y4
	YFAC(+57.021464)LLR	471.747	779.423	16	35	y6
	YFAC(+57.021464)LLR	471.747	632.355	16	35	y5
	YFAC(+57.021464)LLR	471.747	561.318	16	35	y4
NDUFA2	LGLR	229.658	345.224	7	35	y3	0.7	0.6709	0.0333
	LGLR	229.658	288.203	7	35	y2
	ANPDLPILIR	561.337	839.535	20	35	y7
	ANPDLPILIR	561.337	724.508	20	35	y6
	ANPDLPILIR	561.337	611.424	20	35	y5
	YAFGQEK	421.706	679.341	15	35	y6
	YAFGQEK	421.706	608.304	15	35	y5
	YAFGQEK	421.706	461.235	15	35	y4
	NVSLNNFSADQVTR	782.889	1151.54	28	35	y10
	NVSLNNFSADQVTR	782.889	1037.5	28	35	y9
	NVSLNNFSADQVTR	782.889	923.458	28	35	y8
GLUD1	GASIVEDK	409.716	690.367	14	35	y6	0.7	0.5629	0.0109
	GASIVEDK	409.716	603.335	14	35	y5
	GASIVEDK	409.716	490.251	14	35	y4
	DDGSWEVIEGYR	713.318	1051.52	25	35	y8
	DDGSWEVIEGYR	713.318	865.441	25	35	y7
	DDGSWEVIEGYR	713.318	736.399	25	35	y6
	YSTDVSVDEVK	621.298	890.447	22	35	y8
	YSTDVSVDEVK	621.298	775.42	22	35	y7
	YSTDVSVDEVK	621.298	676.351	22	35	y6
	NYTDNELEK	563.257	848.4	20	35	y7
	NYTDNELEK	563.257	747.352	20	35	y6
	NYTDNELEK	563.257	632.325	20	35	y5
	ISATGR	302.674	491.257	10	35	y5
	ISATGR	302.674	404.225	10	35	y4
	ISATGR	302.674	333.188	10	35	y3
	YNLGLDLR	482.267	686.42	17	35	y6
	YNLGLDLR	482.267	573.335	17	35	y5
	YNLGLDLR	482.267	516.314	17	35	y4
	TAAYVNAIEK	540.29	836.451	19	35	y7
	TAAYVNAIEK	540.29	673.388	19	35	y6
	TAAYVNAIEK	540.29	574.32	19	35	y5
	ALASLMTYK	499.273	742.38	17	35	y6
	ALASLMTYK	499.273	655.348	17	35	y5
	ALASLMTYK	499.273	542.264	17	35	y4
	FTMELAK	420.22	692.365	14	35	y6
	FTMELAK	420.22	591.317	14	35	y5
	FTMELAK	420.22	460.277	14	35	y4
	GFIGPGVDVPAPDMSTGER	951.457	1159.54	34	35	y11
	GFIGPGVDVPAPDMSTGER	951.457	1060.47	34	35	y10
	GFIGPGVDVPAPDMSTGER	951.457	963.42	34	35	y9
	MVEGFFDR	500.731	770.347	17	35	y6
	MVEGFFDR	500.731	641.304	17	35	y5
	MVEGFFDR	500.731	584.283	17	35	y4
COX4I1	SEDYALPSYVDR	707.828	920.484	25	35	y8	0.7	0.6246	0.0127
	SEDYALPSYVDR	707.828	849.446	25	35	y7
	SEDYALPSYVDR	707.828	736.362	25	35	y6
	ASWSSLSIDEK	611.801	878.447	22	35	y8
	ASWSSLSIDEK	611.801	791.415	22	35	y7
	ASWSSLSIDEK	611.801	704.382	22	35	y6
	VELYR	340.192	580.309	12	35	y4
	VELYR	340.192	451.266	12	35	y3
	DYPLPDVAHVK	627.33	878.509	22	35	y8
	DYPLPDVAHVK	627.33	765.425	22	35	y7
	DYPLPDVAHVK	627.33	668.373	22	35	y6
	ESFAEMNR	492.216	767.35	17	35	y6
	ESFAEMNR	492.216	620.282	17	35	y5
	ESFAEMNR	492.216	549.245	17	35	y4
IDH3A	APIQWEER	514.762	860.426	18	35	y6	0.7	0.5841	0.0242
	APIQWEER	514.762	747.342	18	35	y5
	APIQWEER	514.762	619.283	18	35	y4
	NVAAIQGPGGK	506.283	727.41	18	35	y8
	NVAAIQGPGGK	506.283	656.373	18	35	y7
	NVAAIQGPGGK	506.283	543.289	18	35	y6
	IAEFAFEYAR	608.803	903.436	21	35	y7
	IAEFAFEYAR	608.803	756.368	21	35	y6
	IAEFAFEYAR	608.803	685.33	21	35	y5
	DLGGNSK	345.674	462.231	12	35	y5
	DLGGNSK	345.674	405.209	12	35	y4
	DLGGNSK	345.674	348.188	12	35	y3
MDH1	DVIATDK	381.206	646.377	13	35	y6	0.69602	0.584899	0.0193
	DVIATDK	381.206	547.309	13	35	y5
	DVIATDK	381.206	434.225	13	35	y4
	SAPSIPK	350.205	541.334	12	35	y5
	SAPSIPK	350.205	444.282	12	35	y4
	SAPSIPK	350.205	357.25	12	35	y3
	AQIALK	322.211	572.377	11	35	y5
	AQIALK	322.211	444.318	11	35	y4
	AQIALK	322.211	331.234	11	35	y3
	LGVTSDDVK	467.248	664.315	16	35	y6
	LGVTSDDVK	467.248	563.267	16	35	y5
	LGVTSDDVK	467.248	476.235	16	35	y4
	GEFITTVQQR	589.812	845.484	21	35	y7
	GEFITTVQQR	589.812	732.4	21	35	y6
	GEFITTVQQR	589.812	631.352	21	35	y5
	VVEGLPINDFSR	673.359	961.51	24	35	y8
	VVEGLPINDFSR	673.359	848.426	24	35	y7
	VVEGLPINDFSR	673.359	751.373	24	35	y6
	ENFSC(+57.021464)LTR	513.737	783.382	18	35	y6
	ENFSC(+57.021464)LTR	513.737	636.313	18	35	y5
	ENFSC(+57.021464)LTR	513.737	549.281	18	35	y4
	VIVVGNPANTNC(+57.021464)LTASK	879.464	1079.51	31	35	y10
	VIVVGNPANTNC(+57.021464)LTASK	879.464	1008.48	31	35	y9
	VIVVGNPANTNC(+57.021464)LTASK	879.464	894.435	31	35	y8
ENO3	EILDSR	366.698	603.346	13	35	y5	0.587291	0.63405	0.0261
	EILDSR	366.698	490.262	13	35	y4
	EILDSR	366.698	377.178	13	35	y3
	AGAAEK	273.648	418.23	9	35	y4
	AGAAEK	273.648	347.193	9	35	y3
	AGAAEK	273.648	276.155	9	35	y2
	GVPLYR	352.708	647.388	12	35	y5
	GVPLYR	352.708	548.319	12	35	y4
	GVPLYR	352.708	451.266	12	35	y3
	AC(+57.021464)NC(+57.021464)LLLK	496.257	920.469	17	35	y7
	AC(+57.021464)NC(+57.021464)LLLK	496.257	760.439	17	35	y6
	AC(+57.021464)NC(+57.021464)LLLK	496.257	646.396	17	35	y5
	YNQLMR	412.708	661.345	14	35	y5
	YNQLMR	412.708	547.302	14	35	y4
	YNQLMR	412.708	419.243	14	35	y3
GPD1	GVDEGPK	351.177	644.325	12	35	y6	0.439517	0.696602	0.0258
	GVDEGPK	351.177	545.257	12	35	y5
	GVDEGPK	351.177	430.23	12	35	y4
	LISEVIGER	508.293	789.41	18	35	y7
	LISEVIGER	508.293	702.378	18	35	y6
	LISEVIGER	508.293	573.335	18	35	y5
	AAVIR	265.176	458.309	9	35	y4
	AAVIR	265.176	387.271	9	35	y3
	AAVIR	265.176	288.203	9	35	y2
	VAEAFAR	382.208	593.304	13	35	y5
	VAEAFAR	382.208	464.262	13	35	y4
	VAEAFAR	382.208	393.224	13	35	y3
STX1B	LSEDVEQVK	523.772	717.378	18	35	y6	0.6435	0.580305	0.0269
	LSEDVEQVK	523.772	602.351	18	35	y5
	QALNEIETR	537.283	874.463	19	35	y7
	QALNEIETR	537.283	761.379	19	35	y6
	QALNEIETR	537.283	647.336	19	35	y5
	LSEDVEQVK	523.772	846.42	18	35	y7
	LSEDVEQVK	523.772	717.378	18	35	y6
	LSEDVEQVK	523.772	602.351	18	35	y5
	QELEDLTTDIK	652.833	934.473	23	35	y8
	QELEDLTTDIK	652.833	805.43	23	35	y7
	QELEDLTTDIK	652.833	690.403	23	35	y6
STXBP1	NPILER	371.216	627.382	13	35	y5	0.6544	0.5787	0.0201
	NPILER	371.216	530.33	13	35	y4
	NPILER	371.216	417.246	13	35	y3
	LAEQIATLC(+57.021464)ATLK	716.397	990.565	25	35	y9
	LAEQIATLC(+57.021464)ATLK	716.397	877.481	25	35	y8
	LAEQIATLC(+57.021464)ATLK	716.397	806.444	25	35	y7
	SQLLILDR	479.29	742.482	17	35	y6
	SQLLILDR	479.29	629.398	17	35	y5
	SQLLILDR	479.29	516.314	17	35	y4
	YETSGIGEAR	541.759	689.358	19	35	y7
	YETSGIGEAR	541.759	602.326	19	35	y6
	YETSGIGEAR	541.759	545.304	19	35	y5
	NGITEENLNK	566.286	847.416	20	35	y7
	NGITEENLNK	566.286	746.368	20	35	y6
	NGITEENLNK	566.286	617.325	20	35	y5
	ISEQTYQLSR	612.815	895.463	22	35	y7
	ISEQTYQLSR	612.815	767.405	22	35	y6
	ISEQTYQLSR	612.815	666.357	22	35	y5
	WTPIIK	379.234	571.381	13	35	y5
	WTPIIK	379.234	470.334	13	35	y4
	SSASFSTTAVSAR	636.315	939.489	22	35	y9
	SSASFSTTAVSAR	636.315	792.421	22	35	y8
	SSASFSTTAVSAR	636.315	705.389	22	35	y7
	DLSQMLK	417.723	719.412	14	35	y6
	DLSQMLK	417.723	606.328	14	35	y5
	DLSQMLK	417.723	519.296	14	35	y4
	ISEQTYQLSR	612.815	895.463	22	35	y7
	ISEQTYQLSR	612.815	767.405	22	35	y6
	ISEQTYQLSR	612.815	666.357	22	35	y5
	VEQDLAMGTDAEGEK	796.859	1008.43	28	35	y10
	VEQDLAMGTDAEGEK	796.859	937.393	28	35	y9
	VEQDLAMGTDAEGEK	796.859	806.353	28	35	y8
	VLVVDQLSMR	580.329	848.429	20	35	y7
	VLVVDQLSMR	580.329	749.361	20	35	y6
	VLVVDQLSMR	580.329	634.334	20	35	y5
NAPA	AIEIYTDMGR	584.787	984.446	21	35	y8	0.6754	0.5321	0.0111
	AIEIYTDMGR	584.787	855.403	21	35	y7
	AIEIYTDMGR	584.787	742.319	21	35	y6
	TIQGDEEDLR	588.281	833.364	21	35	y7
	TIQGDEEDLR	588.281	776.342	21	35	y6
	TIQGDEEDLR	588.281	661.315	21	35	y5
	YEELFPAFSDSR	730.838	1039.52	26	35	y9
	YEELFPAFSDSR	730.838	926.437	26	35	y8
	YEELFPAFSDSR	730.838	779.368	26	35	y7
DNAJC6	LFSNLK	361.216	608.34	12	35	y5	0.6995	0.7636	0.004
	LFSNLK	361.216	461.272	12	35	y4
	LFSNLK	361.216	374.24	12	35	y3
	VIQSVTSYTK	563.311	785.404	20	35	y7
	VIQSVTSYTK	563.311	698.372	20	35	y6
	VIQSVTSYTK	563.311	599.304	20	35	y5
	ILEWIEGK	494.279	874.467	17	35	y7
	ILEWIEGK	494.279	761.383	17	35	y6
	ILEWIEGK	494.279	632.34	17	35	y5
PP3CA	IITEGASILR	536.822	745.42	19	35	y7	0.6063	0.4509	0.0252
	IITEGASILR	536.822	616.378	19	35	y6
	IITEGASILR	536.822	559.356	19	35	y5
	TLFLLR	381.747	661.44	13	35	y5
	TLFLLR	381.747	548.355	13	35	y4
	TLFLLR	381.747	401.287	13	35	y3
	EESESVLTLK	567.798	789.472	20	35	y7
	EESESVLTLK	567.798	660.429	20	35	y6
	EESESVLTLK	567.798	573.397	20	35	y5
	ITSFEEAK	462.737	710.336	16	35	y6
	ITSFEEAK	462.737	623.304	16	35	y5
	ITSFEEAK	462.737	476.235	16	35	y4
	LFEVGGSPANTR	624.323	759.374	22	35	y8
	LFEVGGSPANTR	624.323	702.353	22	35	y7
	LFEVGGSPANTR	624.323	645.331	22	35	y6
	IILDLISESPIK	670.905	1001.55	24	35	y9
	IILDLISESPIK	670.905	886.524	24	35	y8
	IILDLISESPIK	670.905	773.44	24	35	y7
	IIPGFMC(+57.021464)QGGDFTR	799.876	1218.5	29	35	y10
	IIPGFMC(+57.021464)QGGDFTR	799.876	1071.43	29	35	y9
	IIPGFMC(+57.021464)QGGDFTR	799.876	940.394	29	35	y8
	IISSHGC(+57.021464)K	451.232	675.288	16	35	y6
	IISSHGC(+57.021464)K	451.232	588.256	16	35	y5
	IISSHGC(+57.021464)K	451.232	501.224	16	35	y4
CAMK2B	FYFENLLAK	572.805	997.535	20	35	y8	0.6656	0.4389	0.0143
	FYFENLLAK	572.805	834.472	20	35	y7
	FYFENLLAK	572.805	687.404	20	35	y6
	SIAELVPK	428.761	656.398	15	35	y6
	SIAELVPK	428.761	585.361	15	35	y5
	SIAELVPK	428.761	456.318	15	35	y4
	SIAELVPK	466.756	732.389	16	35	y6
	SIAELVPK	466.756	603.346	16	35	y5
	SIAELVPK	466.756	490.262	16	35	y4
	SILFVPTSAPR	594.343	874.478	21	35	y8
	SILFVPTSAPR	594.343	727.41	21	35	y7
	SILFVPTSAPR	594.343	628.341	21	35	y6
	GAFSVVR	368.211	607.356	13	35	y5
	GAFSVVR	368.211	460.288	13	35	y4
	GAFSVVR	368.211	373.256	13	35	y3
	FYFENLLAK	572.805	997.535	20	35	y8
	FYFENLLAK	572.805	834.472	20	35	y7
	FYFENLLAK	572.805	687.404	20	35	y6
PAFAH1B1	IFANSPDSGC(+57.021464)VLGMR	812.385	1091.5	29	35	y10	0.7125	0.6105	0.0173
	IFANSPDSGC(+57.021464)VLGMR	812.385	994.444	29	35	y9
	IFANSPDSGC(+57.021464)VLGMR	812.385	879.418	29	35	y8
	IFDAVGFTFPNR	692.356	937.489	25	35	y8
	IFDAVGFTFPNR	692.356	838.421	25	35	y7
	IFDAVGFTFPNR	692.356	781.399	25	35	y6
	IFDAVGFTFPNR	617.364	916.546	22	35	y8
	IFDAVGFTFPNR	617.364	817.478	22	35	y7
	IFDAVGFTFPNR	617.364	716.43	22	35	y6
	IFLQDIK	438.763	763.435	15	35	y6
	IFLQDIK	438.763	616.366	15	35	y5
	IFLQDIK	438.763	503.282	15	35	y4
	SGKPGPFLLSGSR	651.862	933.515	23	35	y9
	SGKPGPFLLSGSR	651.862	876.494	23	35	y8
	SGKPGPFLLSGSR	651.862	779.441	23	35	y7
PLP1	SGKPGPFLLSGSR	529.304	814.515	19	35	y8	0.2664	0.1761	0.0017
	SGKPGPFLLSGSR	529.304	701.43	19	35	y7
	SGKPGPFLLSGSR	529.304	588.346	19	35	y6
	SGKPGPFLLSGSR	537.762	831.432	19	35	y8
	SGKPGPFLLSGSR	537.762	703.373	19	35	y7
	SGKPGPFLLSGSR	537.762	602.326	19	35	y6
	LIETYFSK	500.771	774.367	17	35	y6
	LIETYFSK	500.771	645.324	17	35	y5
	LIETYFSK	500.771	544.277	17	35	y4
	QIFGDYK	435.721	742.377	15	35	y6
	QIFGDYK	435.721	629.293	15	35	y5
	QIFGDYK	435.721	482.225	15	35	y4
	GLSATVTGGQK	509.78	761.415	18	35	y8
	GLSATVTGGQK	509.78	690.378	18	35	y7
	GLSATVTGGQK	509.78	589.33	18	35	y6
	TSASIGTLC(+57.021464)ADAR	661.822	863.404	23	35	y8
	TSASIGTLC(+57.021464)ADAR	661.822	806.383	23	35	y7
	TSASIGTLC(+57.021464)ADAR	661.822	705.335	23	35	y6
	MYGVLPWNAFPGK	740.376	1029.55	26	35	y9
	MYGVLPWNAFPGK	740.376	916.468	26	35	y8
	MYGVLPWNAFPGK	740.376	819.415	26	35	y7
	VC(+57.021464)GSNLLSIC(+57.021464)K	625.815	934.503	22	35	y8
	VC(+57.021464)GSNLLSIC(+57.021464)K	625.815	847.471	22	35	y7
	VC(+57.021464)GSNLLSIC(+57.021464)K	625.815	733.428	22	35	y6
MBP	FSWGAEGQK	505.241	775.373	18	35	y7	0.294	0.2307	0.0013
	FSWGAEGQK	505.241	589.294	18	35	y6
	FSWGAEGQK	505.241	532.273	18	35	y5
	PGFGYGGR	405.698	656.315	14	35	y6
	PGFGYGGR	405.698	509.247	14	35	y5
	PGFGYGGR	405.698	452.225	14	35	y4
	SKYLASASTMDHAR	769.375	975.431	27	35	y9
	SKYLASASTMDHAR	769.375	888.399	27	35	y8
	SKYLASASTMDHAR	769.375	817.362	27	35	y7
	TTHYGSLPQK	566.293	792.425	20	35	y7
	TTHYGSLPQK	566.293	629.362	20	35	y6
	TTHYGSLPQK	566.293	572.34	20	35	y5
	YLASASTMDHAR	661.812	888.399	23	35	y8
	YLASASTMDHAR	661.812	817.362	23	35	y7
	YLASASTMDHAR	661.812	730.33	23	35	y6
	EAAAAEEPAPR	556.273	769.384	20	35	y7
	EAAAAEEPAPR	556.273	698.347	20	35	y6
	EAAAAEEPAPR	556.273	569.304	20	35	y5
	EAAENSLVAYK	597.804	923.483	21	35	y8
	EAAENSLVAYK	597.804	794.441	21	35	y7
	EAAENSLVAYK	597.804	680.398	21	35	y6
	EAASYQEALAR	604.799	937.474	21	35	y8
	EAASYQEALAR	604.799	850.442	21	35	y7
	EAASYQEALAR	604.799	687.378	21	35	y6
	EAEDGFR	412.183	694.315	14	35	y6
	EAEDGFR	412.183	623.278	14	35	y5
	EAEDGFR	412.183	494.236	14	35	y4
	EAEQSPQER	537.247	873.406	19	35	y7
	EAEQSPQER	537.247	744.363	19	35	y6
	EAEQSPQER	537.247	616.305	19	35	y5
	EAFEISK	412.213	694.377	14	35	y6
	EAFEISK	412.213	623.34	14	35	y5
	EAFEISK	412.213	476.271	14	35	y4
	DTGILDSLGR	523.777	773.452	18	35	y7
	DTGILDSLGR	523.777	660.368	18	35	y6
	DTGILDSLGR	523.777	547.283	18	35	y5
	FFGSDR	364.672	581.268	12	35	y5
	FFGSDR	364.672	434.199	12	35	y4
	FFGSDR	364.672	377.178	12	35	y3
	NIVTPR	350.211	585.372	12	35	y5
	NIVTPR	350.211	472.288	12	35	y4
	NIVTPR	350.211	373.219	12	35	y3
	GLSLSR	316.69	575.351	11	35	y5
	GLSLSR	316.69	462.267	11	35	y4
	GLSLSR	316.69	375.235	11	35	y3
MOG	ALVGDEVELPC(+57.021464)R	679.343	1017.47	24	35	y8	0.356	0.4519	0.0189
	ALVGDEVELPC(+57.021464)R	679.343	902.44	24	35	y7
	ALVGDEVELPC(+57.021464)R	679.343	773.397	24	35	y6
	FSDEGGFTC(+57.021464)FFR	735.311	991.445	26	35	y8
	FSDEGGFTC(+57.021464)FFR	735.311	934.424	26	35	y7
	FSDEGGFTC(+57.021464)FFR	735.311	877.403	26	35	y6
	LAGQFLEELR	588.325	934.499	21	35	y7
	LAGQFLEELR	588.325	806.441	21	35	y6
	LAGQFLEELR	588.325	659.372	21	35	y5
	IQTQPGYANTLR	681.362	891.468	24	35	y8
	IQTQPGYANTLR	681.362	794.416	24	35	y7
	IQTQPGYANTLR	681.362	737.394	24	35	y6
	IREEFPDR	531.272	792.352	19	35	y6
	IREEFPDR	531.272	663.31	19	35	y5
	IREEFPDR	531.272	534.267	19	35	y4
CNP	TLFILR	381.747	661.44	13	35	y5	0.3773	0.2282	0.0071
	TLFILR	381.747	548.355	13	35	y4
	TLFILR	381.747	401.287	13	35	y3
	FIVDK	311.184	474.292	10	35	y4
	FIVDK	311.184	361.208	10	35	y3
	GSFSEEYK	473.711	802.362	16	35	y6
	GSFSEEYK	473.711	655.293	16	35	y5
	GSFSEEYK	473.711	568.261	16	35	y4
	IELVTYFGK	535.3	827.466	19	35	y7
	IELVTYFGK	535.3	714.382	19	35	y6
	IELVTYFGK	535.3	615.314	19	35	y5
	GEEVGELSR	488.241	660.368	17	35	y6
	GEEVGELSR	488.241	561.299	17	35	y5
	GEEVGELSR	488.241	504.278	17	35	y4
	AIFTGYYGK	510.263	688.33	18	35	y6
	AIFTGYYGK	510.263	587.282	18	35	y5
	AIFTGYYGK	510.263	530.261	18	35	y4
	HFVSGDEPR	522.249	759.363	18	35	y7
	HFVSGDEPR	522.249	660.295	18	35	y6
	HFVSGDEPR	522.249	573.263	18	35	y5
INA	LSGAGGSGSFR	498.249	667.316	17	35	y7	0.3596	0.2372	0.0057
	LSGAGGSGSFR	498.249	610.294	17	35	y6
	LSGAGGSGSFR	498.249	553.273	17	35	y5
	EQLQGLNDR	536.773	815.437	19	35	y7
	EQLQGLNDR	536.773	702.353	19	35	y6
	EQLQGLNDR	536.773	574.294	19	35	y5
	FAVFIEK	427.245	706.413	15	35	y6
	FAVFIEK	427.245	635.376	15	35	y5
	FAVFIEK	427.245	536.308	15	35	y4
	ALEAELAALR	528.806	743.441	18	35	y7
	ALEAELAALR	528.806	672.404	18	35	y6
	ALEAELAALR	528.806	543.361	18	35	y5
	VGELFQR	424.735	692.373	15	35	y5
	VGELFQR	424.735	563.33	15	35	y4
	VGELFQR	424.735	450.246	15	35	y3
	AQLEEASSAR	531.265	862.426	19	35	y8
	AQLEEASSAR	531.265	749.342	19	35	y7
	AQLEEASSAR	531.265	620.3	19	35	y6
	DGLAEEVQR	508.754	731.368	18	35	y6
	DGLAEEVQR	508.754	660.331	18	35	y5
	DGLAEEVQR	508.754	531.289	18	35	y4
	AQYESLAAK	490.756	909.468	17	35	y8
	AQYESLAAK	490.756	781.409	17	35	y7
	AQYESLAAK	490.756	618.346	17	35	y6
	NLQSAEEWYK	634.301	912.41	22	35	y7
	NLQSAEEWYK	634.301	825.378	22	35	y6
	NLQSAEEWYK	634.301	754.341	22	35	y5
	FANLNEQAAR	567.289	801.421	20	35	y7
	FANLNEQAAR	567.289	688.337	20	35	y6
	FANLNEQAAR	567.289	574.294	20	35	y5
VIM	SYVTTSTR	457.733	664.362	16	35	y6	5.7232	2.7293	0.0163
	SYVTTSTR	457.733	565.294	16	35	y5
	SYVTTSTR	457.733	464.246	16	35	y4
	FLEQQNK	453.738	759.4	16	35	y6
	FLEQQNK	453.738	646.315	16	35	y5
	FLEQQNK	453.738	517.273	16	35	y4
	FADLSEAANR	547.267	760.395	19	35	y7
	FADLSEAANR	547.267	647.311	19	35	y6
	FADLSEAANR	547.267	560.279	19	35	y5
	LLEGEESR	466.738	706.3	16	35	y6
	LLEGEESR	466.738	577.258	16	35	y5
	LLEGEESR	466.738	520.236	16	35	y4
	DNLAEDIMR	538.756	847.434	19	35	y7
	DNLAEDIMR	538.756	734.35	19	35	y6
	DNLAEDIMR	538.756	663.313	19	35	y5
	LGDLYEEEMR	627.787	969.435	22	35	y7
	LGDLYEEEMR	627.787	856.351	22	35	y6
	LGDLYEEEMR	627.787	693.287	22	35	y5
GFAP	LSLAR	280.182	446.272	9	35	y4	1.5259	1.265	0.0408
	LSLAR	280.182	359.24	9	35	y3
	FASYIEK	429.224	710.372	15	35	y6
	FASYIEK	429.224	639.335	15	35	y5
	FASYIEK	429.224	552.303	15	35	y4
	FLEQQNK	453.738	759.4	16	35	y6
	FLEQQNK	453.738	646.315	16	35	y5
	FLEQQNK	453.738	517.273	16	35	y4
	ALAAELNQLR	549.817	843.468	19	35	y7
	ALAAELNQLR	549.817	772.431	19	35	y6
	ALAAELNQLR	549.817	643.389	19	35	y5
	LADVYQAELR	589.314	878.473	21	35	y7
	LADVYQAELR	589.314	779.405	21	35	y6
	LADVYQAELR	589.314	616.341	21	35	y5
	LDQLTANSAR	544.788	860.458	19	35	y8
	LDQLTANSAR	544.788	732.4	19	35	y7
	LDQLTANSAR	544.788	619.316	19	35	y6
	DNLAQDLGTLR	608.32	873.479	21	35	y8
	DNLAQDLGTLR	608.32	802.442	21	35	y7
	DNLAQDLGTLR	608.32	674.383	21	35	y6
	FADLNDAAAR	532.262	845.411	19	35	y8
	FADLNDAAAR	532.262	730.384	19	35	y7
	FADLNDAAAR	532.262	617.3	19	35	y6
	NAELLR	358.208	601.367	12	35	y5
	NAELLR	358.208	530.33	12	35	y4
	NAELLR	358.208	401.287	12	35	y3
	EAASYQEALAR	604.799	937.474	21	35	y8
	EAASYQEALAR	604.799	850.442	21	35	y7
	EAASYQEALAR	604.799	687.378	21	35	y6
	LLEGEENR	480.243	733.311	17	35	y6
	LLEGEENR	480.243	604.269	17	35	y5
	LLEGEENR	480.243	547.247	17	35	y4
	IESLEEEIR	559.29	875.447	20	35	y7
	IESLEEEIR	559.29	788.415	20	35	y6
	IESLEEEIR	559.29	675.331	20	35	y5
	MPPPLPAR	439.749	650.398	15	35	y6
	MPPPLPAR	439.749	553.346	15	35	y5
	MPPPLPAR	439.749	456.293	15	35	y4
	QLQALTC(+57.021464)DLESLR	773.898	1106.55	28	35	y9
	QLQALTC(+57.021464)DLESLR	773.898	993.467	28	35	y8
	QLQALTC(+57.021464)DLESLR	773.898	892.419	28	35	y7
NEFL	AQLQDLNDR	536.773	873.442	19	35	y7	0.2475	0.1698	0.0132
	AQLQDLNDR	536.773	760.358	19	35	y6
	AQLQDLNDR	536.773	632.3	19	35	y5
	VLEAELLVLR	577.861	813.519	20	35	y7
	VLEAELLVLR	577.861	742.482	20	35	y6
	VLEAELLVLR	577.861	613.44	20	35	y5
	ALYEQEIR	511.269	837.41	18	35	y6
	ALYEQEIR	511.269	674.347	18	35	y5
	ALYEQEIR	511.269	545.304	18	35	y4
	EGLEETLR	473.746	760.42	16	35	y6
	EGLEETLR	473.746	647.336	16	35	y5
	EGLEETLR	473.746	518.293	16	35	y4
	YEEEVLSR	512.751	861.431	18	35	y7
	YEEEVLSR	512.751	732.389	18	35	y6
	YEEEVLSR	512.751	603.346	18	35	y5
	FTVLTESAAK	533.793	818.462	19	35	y8
	FTVLTESAAK	533.793	719.393	19	35	y7
	FTVLTESAAK	533.793	606.309	19	35	y6
	GMNEALEK	446.216	703.362	15	35	y6
	GMNEALEK	446.216	589.319	15	35	y5
	GMNEALEK	446.216	460.277	15	35	y4
ANXA2	SNEQR	317.151	546.263	11	35	y4	5.2179	2.29	0.1407
	SNEQR	317.151	432.22	11	35	y3
	ELASALK	366.219	602.387	12	35	y6
	ELASALK	366.219	489.303	12	35	y5
	ELASALK	366.219	418.266	12	35	y4
	VFER	275.653	451.23	9	35	y3
	VFER	275.653	304.162	9	35	y2
	TNQELQEINR	622.815	901.474	22	35	y7
	TNQELQEINR	622.815	772.431	22	35	y6
	TNQELQEINR	622.815	659.347	22	35	y5
	WISIMTER	518.268	736.366	18	35	y6
	WISIMTER	518.268	649.334	18	35	y5
	WISIMTER	518.268	536.25	18	35	y4
TTR	VLDAVR	336.706	573.335	11	35	y5	4.0161	2.51	0.1168
	VLDAVR	336.706	460.251	11	35	y4
	VLDAVR	336.706	345.224	11	35	y3
	VLDAVRGSPAANVGVK	776.944	1225.7	28	35	y13
	VLDAVRGSPAANVGVK	776.944	1154.66	28	35	y12
	VLDAVRGSPAANVGVK	776.944	1055.6	28	35	y11
	VLDAVRGSPAANVGVK	776.944	899.495	28	35	y10
	VLDAVRGSPAANVGVK	776.944	842.473	28	35	y9
	GSPAANVGVK	450.251	842.473	16	35	y9
	GSPAANVGVK	450.251	755.441	16	35	y8
	GSPAANVGVK	450.251	658.388	16	35	y7
	GSPAANVGVK	450.251	587.351	16	35	y6
	GSPAANVGVK	450.251	516.314	16	35	y5
	GSPAANVGVKVFK	637.367	1032.62	23	35	y10
	GSPAANVGVKVFK	637.367	961.583	23	35	y9
	GSPAANVGVKVFK	637.367	890.546	23	35	y8
	GSPAANVGVKVFK	637.367	776.503	23	35	y7
	GSPAANVGVKVFK	637.367	677.434	23	35	y6
	VFKK	261.176	422.276	9	35	y3
	VFKK	261.176	275.208	9	35	y2
	KAADETWEPFASGK	768.87	1337.6	27	35	y12
	KAADETWEPFASGK	768.87	1266.56	27	35	y11
	KAADETWEPFASGK	768.87	1151.54	27	35	y10
	KAADETWEPFASGK	768.87	1022.49	27	35	y9
	KAADETWEPFASGK	768.87	921.446	27	35	y8
	AADETWEPFASGK	704.823	1266.56	25	35	y11
	AADETWEPFASGK	704.823	1151.54	25	35	y10
	AADETWEPFASGK	704.823	1022.49	25	35	y9
	AADETWEPFASGK	704.823	921.446	25	35	y8
	AADETWEPFASGK	704.823	735.367	25	35	y7
	TSESGELHGLTTEDK	802.376	1286.62	29	35	y12
	TSESGELHGLTTEDK	802.376	1199.59	29	35	y11
	TSESGELHGLTTEDK	802.376	1142.57	29	35	y10
	TSESGELHGLTTEDK	802.376	1013.53	29	35	y9
	TSESGELHGLTTEDK	802.376	900.442	29	35	y8
	FVEGLYK	428.234	708.393	15	35	y6
	FVEGLYK	428.234	609.324	15	35	y5
	FVEGLYK	428.234	480.282	15	35	y4
	FVEGLYKVELDTK	770.917	1294.69	27	35	y11
	FVEGLYKVELDTK	770.917	1165.65	27	35	y10
	FVEGLYKVELDTK	770.917	1108.62	27	35	y9
	FVEGLYKVELDTK	770.917	995.541	27	35	y8
	FVEGLYKVELDTK	770.917	832.477	27	35	y7
	VELDTK	352.695	605.314	12	35	y5
	VELDTK	352.695	476.271	12	35	y4
	VELDTK	352.695	363.187	12	35	y3
	VELDTKSYWK	634.83	1169.58	22	35	y9
	VELDTKSYWK	634.83	1040.54	22	35	y8
	VELDTKSYWK	634.83	927.457	22	35	y7
	VELDTKSYWK	634.83	812.43	22	35	y6
	VELDTKSYWK	634.83	711.382	22	35	y5
	SYWK	292.147	496.255	10	35	y3
	SYWK	292.147	333.192	10	35	y2
ATP6V1H	LNEK	252.145	390.198	8	35	y3	0.7158	0.79	0.0605
	LNEK	252.145	276.155	8	35	y2
	VIEQLGGK	422.25	744.425	15	35	y7
	VIEQLGGK	422.25	631.341	15	35	y6
	VIEQLGGK	422.25	502.298	15	35	y5
	YNALLAVQK	510.298	742.482	18	35	y7
	YNALLAVQK	510.298	671.445	18	35	y6
	YNALLAVQK	510.298	558.361	18	35	y5
	LGESVQDLSSFDEYSSELK	1067	1291.57	38	35	y11
	LGESVQDLSSFDEYSSELK	1067	1204.54	38	35	y10
	LGESVQDLSSFDEYSSELK	1067	1117.5	38	35	y9
PDHA1	ADQLYK	369.195	666.346	13	35	y5	0.7157	0.73	0.0557
	ADQLYK	369.195	551.319	13	35	y4
	ADQLYK	369.195	423.26	13	35	y3
	GLSVR	266.166	474.303	9	35	y4
	GLSVR	266.166	361.219	9	35	y3
	GLSVR	266.166	274.187	9	35	y2
	EILAELTGR	501.285	759.436	17	35	y7
	EILAELTGR	501.285	646.352	17	35	y6
	EILAELTGR	501.285	575.315	17	35	y5
	GDFIPGLR	437.743	702.43	15	35	y6
	GDFIPGLR	437.743	555.361	15	35	y5
	GDFIPGLR	437.743	442.277	15	35	y4
	EEIQEVR	451.733	773.415	16	35	y6
	EEIQEVR	451.733	644.373	16	35	y5
	EEIQEVR	451.733	531.289	16	35	y4
	GANQWIK	408.722	688.378	14	35	y5
	GANQWIK	408.722	574.335	14	35	y4
	GANQWIK	408.722	446.276	14	35	y3
	GPILMELQTYR	660.853	940.456	23	35	y7
	GPILMELQTYR	660.853	809.415	23	35	y6
	GPILMELQTYR	660.853	680.373	23	35	y5
	LEEGPPVTTVLTR	706.393	983.588	25	35	y9
	LEEGPPVTTVLTR	706.393	886.536	25	35	y8
	LEEGPPVTTVLTR	706.393	789.483	25	35	y7
	LPC(+57.021464)IFIC(+57.021464)ENNR	718.345	1065.51	26	35	y8
	LPC(+57.021464)IFIC(+57.021464)ENNR	718.345	952.431	26	35	y7
	LPC(+57.021464)IFIC(+57.021464)ENNR	718.345	805.362	26	35	y6
	MMQTVRRMELK	711.873	1032.6	25	35	y8
	MMQTVRRMELK	711.873	931.551	25	35	y7
	MMQTVRRMELK	711.873	832.482	25	35	y6
	YGMGTSVER	500.232	779.372	17	35	y7
	YGMGTSVER	500.232	648.331	17	35	y6
	YGMGTSVER	500.232	591.31	17	35	y5
	YHGHSMSDPGVSYR	796.849	1098.49	28	35	y10
	YHGHSMSDPGVSYR	796.849	1011.46	28	35	y9
	YHGHSMSDPGVSYR	796.849	880.416	28	35	y8
