# Supplementary material for: Proteomic signature profiling in the cortex of dairy cattle unravels the physiology of brain aging
Source: Front Aging Neurosci. 2023 Dec 7;15:1277546. doi: 10.3389/fnagi.2023.1277546 (PMC10733460; doi:10.3389/fnagi.2023.1277546)
Supplement: Supplementary file 2 [file Data_Sheet_1.xlsx]

## Sheet: Legend
Table S1 Label-free differential proteomics results
Sheet1: The protein groups generated by MaxQuant software is reported.
Sheet2: The proteins after Perseus and statistical filters are reported
Sheet3: The proteins filtered by the log2 fold change cutoffs are reported

## Sheet: sheet1_Raw protein groups
Protein IDs	Majority protein IDs	Peptide counts (all)	Peptide counts (razor+unique)	Peptide counts (unique)	Fasta headers	Number of proteins	Peptides	Razor + unique peptides	Unique peptides	Peptides AD3_REP1_2	Peptides AD3_REP2_2	Peptides AD4_REP1_2	Peptides AD4_REP2_2	Peptides AD5_REP1_2	Peptides AD5_REP2_2	Peptides AD1_REP1_2	Peptides AD1_REP2_2	Peptides AD2_REP1_2	Peptides AD2_REP2_2	Peptides AG1_REP1_6	Peptides AG1_REP2_6	Peptides AG3_REP1_6	Peptides AG3_REP2_6	Peptides AG4_REP1_6	Peptides AG4_REP2_6	Razor + unique peptides AD3_REP1_2	Razor + unique peptides AD3_REP2_2	Razor + unique peptides AD4_REP1_2	Razor + unique peptides AD4_REP2_2	Razor + unique peptides AD5_REP1_2	Razor + unique peptides AD5_REP2_2	Razor + unique peptides AD1_REP1_2	Razor + unique peptides AD1_REP2_2	Razor + unique peptides AD2_REP1_2	Razor + unique peptides AD2_REP2_2	Razor + unique peptides AG1_REP1_6	Razor + unique peptides AG1_REP2_6	Razor + unique peptides AG3_REP1_6	Razor + unique peptides AG3_REP2_6	Razor + unique peptides AG4_REP1_6	Razor + unique peptides AG4_REP2_6	Unique peptides AD3_REP1_2	Unique peptides AD3_REP2_2	Unique peptides AD4_REP1_2	Unique peptides AD4_REP2_2	Unique peptides AD5_REP1_2	Unique peptides AD5_REP2_2	Unique peptides AD1_REP1_2	Unique peptides AD1_REP2_2
CON__ENSEMBL:ENSBTAP00000007350	CON__ENSEMBL:ENSBTAP00000007350	19	19	3	>ENSEMBL:ENSBTAP00000007350 (Bos taurus) similar to Complement C4-A precursor	1	19	19	3	7	8	5	3	3	0	4	2	3	4	18	17	3	5	6	8	7	8	5	3	3	0	4	2	3	4	18	17	3	5	6	8	1	1	1	0	1	0	2	1
CON__ENSEMBL:ENSBTAP00000018229;sp|Q3MHN5|VTDB_BOVIN;CON__Q3MHN5	CON__ENSEMBL:ENSBTAP00000018229;sp|Q3MHN5|VTDB_BOVIN;CON__Q3MHN5	11;10;10	11;10;10	11;10;10	>ENSEMBL:ENSBTAP00000018229 (Bos taurus) 54 kDa protein;>sp|Q3MHN5|VTDB_BOVIN Vitamin D-binding protein OS=Bos taurus OX=9913 GN=GC PE=2 SV=1;>Q3MHN5 SWISS-PROT:Q3MHN5 (Bos taurus) Vitamin D-binding protein precursor	3	11	11	11	6	7	2	2	2	4	2	4	8	8	10	9	7	8	10	10	6	7	2	2	2	4	2	4	8	8	10	9	7	8	10	10	6	7	2	2	2	4	2	4
CON__ENSEMBL:ENSBTAP00000024462	CON__ENSEMBL:ENSBTAP00000024462	23	23	8	>ENSEMBL:ENSBTAP00000024462 (Bos taurus) 47 kDa protein	1	23	23	8	19	18	14	16	18	16	12	13	21	21	18	19	13	15	15	16	19	18	14	16	18	16	12	13	21	21	18	19	13	15	15	16	7	6	4	6	6	6	4	4
CON__ENSEMBL:ENSBTAP00000024466	CON__ENSEMBL:ENSBTAP00000024466	19	4	4	>ENSEMBL:ENSBTAP00000024466 (Bos taurus) 44 kDa protein	1	19	4	4	15	15	13	13	16	13	10	12	17	17	14	15	12	13	14	15	3	3	3	3	4	3	2	3	4	4	3	3	3	2	3	3	3	3	3	3	4	3	2	3
CON__ENSEMBL:ENSBTAP00000031900	CON__ENSEMBL:ENSBTAP00000031900	7	7	7	>ENSEMBL:ENSBTAP00000031900 (Bos taurus) 121 kDa protein	1	7	7	7	4	3	0	0	0	0	0	0	3	3	7	6	2	1	4	4	4	3	0	0	0	0	0	0	3	3	7	6	2	1	4	4	4	3	0	0	0	0	0	0
CON__ENSEMBL:ENSBTAP00000034412	CON__ENSEMBL:ENSBTAP00000034412	8	8	8	>ENSEMBL:ENSBTAP00000034412 (Bos taurus) similar to C4b-binding protein alpha chain	1	8	8	8	5	4	0	0	0	0	1	0	3	3	7	8	5	5	7	7	5	4	0	0	0	0	1	0	3	3	7	8	5	5	7	7	5	4	0	0	0	0	1	0
sp|P00735|THRB_BOVIN;CON__P00735	sp|P00735|THRB_BOVIN;CON__P00735	5;5	5;5	5;5	>sp|P00735|THRB_BOVIN Prothrombin OS=Bos taurus OX=9913 GN=F2 PE=1 SV=2;>P00735 SWISS-PROT:P00735 (Bos taurus) Prothrombin precursor (Fragment)	2	5	5	5	4	4	0	0	1	0	0	2	2	3	5	5	3	3	3	3	4	4	0	0	1	0	0	2	2	3	5	5	3	3	3	3	4	4	0	0	1	0	0	2
CON__P00761	CON__P00761	4	4	4	>P00761 SWISS-PROT:P00761|TRYP_PIG Trypsin - Sus scrofa (Pig).	1	4	4	4	4	4	4	4	4	4	4	4	4	4	4	4	4	4	4	4	4	4	4	4	4	4	4	4	4	4	4	4	4	4	4	4	4	4	4	4	4	4	4	4
sp|P01044|KNG1_BOVIN;CON__P01044-1;CON__Q2KJ62	sp|P01044|KNG1_BOVIN;CON__P01044-1;CON__Q2KJ62	12;12;11	12;12;11	3;3;3	>sp|P01044|KNG1_BOVIN Kininogen-1 OS=Bos taurus OX=9913 GN=KNG1 PE=1 SV=1;>P01044-1 SWISS-PROT:P01044-1 (Bos taurus) Isoform HMW of Kininogen-1 precursor;>Q2KJ62 TREMBL:Q2KJ62 (Bos taurus) KNG protein	3	12	12	3	6	4	0	0	0	0	1	1	7	7	11	11	5	4	9	10	6	4	0	0	0	0	1	1	7	7	11	11	5	4	9	10	0	0	0	0	0	0	0	0
sp|P01966|HBA_BOVIN;CON__P01966	sp|P01966|HBA_BOVIN;CON__P01966	27;27	27;27	27;27	>sp|P01966|HBA_BOVIN Hemoglobin subunit alpha OS=Bos taurus OX=9913 GN=HBA PE=1 SV=2;>P01966 SWISS-PROT:P01966 (Bos taurus) Hemoglobin subunit alpha	2	27	27	27	25	25	13	12	16	14	24	24	20	20	27	27	24	24	23	24	25	25	13	12	16	14	24	24	20	20	27	27	24	24	23	24	25	25	13	12	16	14	24	24
sp|P02070|HBB_BOVIN;CON__P02070	sp|P02070|HBB_BOVIN;CON__P02070	39;39	39;39	34;34	>sp|P02070|HBB_BOVIN Hemoglobin subunit beta OS=Bos taurus OX=9913 GN=HBB PE=1 SV=1;>P02070 SWISS-PROT:P02070 (Bos taurus) Hemoglobin subunit beta	2	39	39	34	35	34	20	19	21	24	33	34	29	28	38	38	32	34	32	33	35	34	20	19	21	24	33	34	29	28	38	38	32	34	32	33	30	29	16	15	17	20	28	29
CON__P02533;CON__P19012;CON__A2A4G1;CON__Q6IFX2;sp|P05785|K1C14_BOVIN;CON__Q61782	CON__P02533	19;6;6;5;3;3	15;3;2;4;3;3	4;0;0;0;1;1	>P02533 SWISS-PROT:P02533 Tax_Id=9606 Gene_Symbol=KRT14 Keratin, type I cytoskeletal 14	6	19	15	4	13	15	9	12	13	9	17	16	14	14	15	13	6	5	16	17	9	11	5	8	9	5	13	12	10	10	11	9	2	2	12	13	1	2	0	1	1	1	2	2
sp|P02584|PROF1_BOVIN;CON__P02584	sp|P02584|PROF1_BOVIN;CON__P02584	9;9	9;9	9;9	>sp|P02584|PROF1_BOVIN Profilin-1 OS=Bos taurus OX=9913 GN=PFN1 PE=1 SV=2;>P02584 SWISS-PROT:P02584 (Bos taurus) Profilin-1	2	9	9	9	8	9	9	9	9	9	9	8	8	9	6	6	8	8	8	9	8	9	9	9	9	9	9	8	8	9	6	6	8	8	8	9	8	9	9	9	9	9	9	8
sp|P02672|FIBA_BOVIN;CON__P02672	sp|P02672|FIBA_BOVIN;CON__P02672	55;55	55;55	55;55	>sp|P02672|FIBA_BOVIN Fibrinogen alpha chain OS=Bos taurus OX=9913 GN=FGA PE=1 SV=5;>P02672 SWISS-PROT:P02672 (Bos taurus) Fibrinogen alpha chain precursor	2	55	55	55	37	40	9	11	11	14	30	28	27	25	53	51	39	37	34	37	37	40	9	11	11	14	30	28	27	25	53	51	39	37	34	37	37	40	9	11	11	14	30	28
CON__P02676;sp|P02676|FIBB_BOVIN	CON__P02676;sp|P02676|FIBB_BOVIN	51;48	51;48	51;48	>P02676 SWISS-PROT:P02676 (Bos taurus) similar to Fibrinogen beta chain precursor;>sp|P02676|FIBB_BOVIN Fibrinogen beta chain OS=Bos taurus OX=9913 GN=FGB PE=1 SV=2	2	51	51	51	43	40	10	8	9	10	32	31	30	29	50	50	41	38	37	40	43	40	10	8	9	10	32	31	30	29	50	50	41	38	37	40	43	40	10	8	9	10	32	31
sp|P02769|ALBU_BOVIN;CON__P02769	sp|P02769|ALBU_BOVIN;CON__P02769	96;96	96;96	92;92	>sp|P02769|ALBU_BOVIN Albumin OS=Bos taurus OX=9913 GN=ALB PE=1 SV=4;>P02769 SWISS-PROT:P02769 (Bos taurus) Bovine serum albumin precursor	2	96	96	92	78	74	70	69	74	70	62	57	82	83	88	86	64	67	74	75	78	74	70	69	74	70	62	57	82	83	88	86	64	67	74	75	74	70	66	65	70	66	58	53
CON__P04264;CON__H-INV:HIT000016045	CON__P04264	48;2	48;2	35;0	>P04264 SWISS-PROT:P04264 Tax_Id=9606 Gene_Symbol=KRT1 Keratin, type II cytoskeletal 1	2	48	48	35	41	43	37	34	39	39	45	47	43	44	41	44	20	22	42	42	41	43	37	34	39	39	45	47	43	44	41	44	20	22	42	42	30	32	25	23	26	27	33	34
sp|P06868|PLMN_BOVIN;CON__P06868	sp|P06868|PLMN_BOVIN;CON__P06868	6;6	6;6	6;6	>sp|P06868|PLMN_BOVIN Plasminogen OS=Bos taurus OX=9913 GN=PLG PE=1 SV=2;>P06868 SWISS-PROT:P06868 (Bos taurus) Plasminogen precursor	2	6	6	6	1	2	0	0	0	0	0	0	2	1	6	6	5	3	4	5	1	2	0	0	0	0	0	0	2	1	6	6	5	3	4	5	1	2	0	0	0	0	0	0
CON__P08779	CON__P08779	19	8	7	>P08779 SWISS-PROT:P08779 Tax_Id=9606 Gene_Symbol=KRT16 Keratin, type I cytoskeletal 16	1	19	8	7	14	15	11	11	12	11	16	14	15	15	17	15	5	4	15	17	5	5	3	2	2	3	5	4	5	5	8	7	0	0	6	6	5	5	3	2	2	3	5	4
sp|P12763|FETUA_BOVIN;CON__P12763	sp|P12763|FETUA_BOVIN;CON__P12763	7;7	7;7	7;7	>sp|P12763|FETUA_BOVIN Alpha-2-HS-glycoprotein OS=Bos taurus OX=9913 GN=AHSG PE=1 SV=2;>P12763 SWISS-PROT:P12763 (Bos taurus) Alpha-2-HS-glycoprotein precursor	2	7	7	7	5	5	1	1	5	5	3	4	5	6	4	4	4	4	7	7	5	5	1	1	5	5	3	4	5	6	4	4	4	4	7	7	5	5	1	1	5	5	3	4
CON__P13645;sp|P06394|K1C10_BOVIN;CON__P02535-1;sp|Q148H6|K1C28_BOVIN;CON__Q148H6;CON__Q7Z3Y7;CON__P05784;sp|Q0P5J4|K1C25_BOVIN;CON__Q7Z3Z0;CON__Q7Z3Y8;sp|Q0P5J6|K1C27_BOVIN;CON__Q99456;CON__A2A5Y0;CON__Q92764;CON__A2AB72;CON__O76015;CON__O76013;CON__Q7Z3Y9;CON__O76014;CON__REFSEQ:XP_986630;CON__Q2M2I5	CON__P13645	37;12;8;3;3;3;2;2;2;2;2;2;1;1;1;1;1;1;1;1;1	37;12;8;3;3;3;2;2;2;2;2;2;1;1;1;1;1;1;1;1;1	32;8;5;1;1;1;0;1;1;1;1;0;0;0;0;0;0;0;0;0;0	>P13645 SWISS-PROT:P13645 Tax_Id=9606 Gene_Symbol=KRT10 Keratin, type I cytoskeletal 10	21	37	37	32	29	30	26	28	33	32	34	34	33	33	34	34	20	17	34	30	29	30	26	28	33	32	34	34	33	33	34	34	20	17	34	30	24	25	21	23	28	27	29	29
sp|P15497|APOA1_BOVIN;CON__P15497	sp|P15497|APOA1_BOVIN;CON__P15497	36;36	36;36	36;36	>sp|P15497|APOA1_BOVIN Apolipoprotein A-I OS=Bos taurus OX=9913 GN=APOA1 PE=1 SV=3;>P15497 SWISS-PROT:P15497 (Bos taurus) Apolipoprotein A-I precursor	2	36	36	36	35	35	21	18	20	18	29	27	32	31	35	35	31	28	33	34	35	35	21	18	20	18	29	27	32	31	35	35	31	28	33	34	35	35	21	18	20	18	29	27
sp|P17690|APOH_BOVIN;CON__P17690	sp|P17690|APOH_BOVIN;CON__P17690	7;7	7;7	7;7	>sp|P17690|APOH_BOVIN Beta-2-glycoprotein 1 OS=Bos taurus OX=9913 GN=APOH PE=1 SV=4;>P17690 SWISS-PROT:P17690 (Bos taurus) Beta-2-glycoprotein 1 precursor	2	7	7	7	2	2	0	0	0	0	0	0	0	0	5	7	2	3	6	6	2	2	0	0	0	0	0	0	0	0	5	7	2	3	6	6	2	2	0	0	0	0	0	0
sp|P17697|CLUS_BOVIN;CON__P17697	sp|P17697|CLUS_BOVIN;CON__P17697	10;10	10;10	10;10	>sp|P17697|CLUS_BOVIN Clusterin OS=Bos taurus OX=9913 GN=CLU PE=1 SV=1;>P17697 SWISS-PROT:P17697 (Bos taurus) Clusterin precursor	2	10	10	10	10	10	10	9	9	10	10	10	10	9	9	9	10	10	10	10	10	10	10	9	9	10	10	10	10	9	9	9	10	10	10	10	10	10	10	9	9	10	10	10
sp|P28800|A2AP_BOVIN;CON__P28800	sp|P28800|A2AP_BOVIN;CON__P28800	5;5	5;5	5;5	>sp|P28800|A2AP_BOVIN Alpha-2-antiplasmin OS=Bos taurus OX=9913 GN=SERPINF2 PE=1 SV=2;>P28800 SWISS-PROT:P28800 (Bos taurus) Alpha-2-antiplasmin precursor	2	5	5	5	4	4	0	0	0	0	2	1	3	2	5	4	2	3	3	4	4	4	0	0	0	0	2	1	3	2	5	4	2	3	3	4	4	4	0	0	0	0	2	1
sp|P34955|A1AT_BOVIN;CON__P34955	sp|P34955|A1AT_BOVIN;CON__P34955	17;17	17;17	17;17	>sp|P34955|A1AT_BOVIN Alpha-1-antiproteinase OS=Bos taurus OX=9913 GN=SERPINA1 PE=1 SV=1;>P34955 SWISS-PROT:P34955 (Bos taurus) Alpha-1-antiproteinase precursor	2	17	17	17	11	12	4	2	3	2	11	9	10	11	14	17	7	9	14	11	11	12	4	2	3	2	11	9	10	11	14	17	7	9	14	11	11	12	4	2	3	2	11	9
CON__P35527	CON__P35527	29	28	28	>P35527 SWISS-PROT:P35527 Tax_Id=9606 Gene_Symbol=KRT9 Keratin, type I cytoskeletal 9	1	29	28	28	28	28	21	24	24	25	28	29	28	27	28	29	16	16	29	27	27	27	20	23	23	24	27	28	27	26	27	28	15	15	28	26	27	27	20	23	23	24	27	28
CON__P35908;sp|P04262|K2CB_BOVIN;sp|P04261|K2C3_BOVIN;sp|Q148H8|K2C72_BOVIN;CON__Q7RTS7;CON__Q32MB2;CON__Q9R0H5;CON__Q14CN4-1;CON__Q6IME9;CON__Q3SY84;sp|Q148H5|K2C71_BOVIN;sp|A3KN27|K2C74_BOVIN;CON__REFSEQ:XP_932229	CON__P35908	42;4;4;4;4;4;3;2;2;2;2;2;1	39;4;4;4;4;4;2;2;2;2;2;2;1	27;0;0;0;0;0;0;0;0;0;0;0;0	>P35908 SWISS-PROT:P35908 Tax_Id=9606 Gene_Symbol=KRT2 Keratin, type II cytoskeletal 2 epidermal	13	42	39	27	31	31	23	22	30	29	41	41	37	38	32	33	9	8	38	34	29	30	21	21	27	27	39	38	35	36	31	31	8	7	35	32	20	21	13	14	19	19	27	26
sp|P41361|ANT3_BOVIN;CON__P41361	sp|P41361|ANT3_BOVIN;CON__P41361	17;17	17;17	17;17	>sp|P41361|ANT3_BOVIN Antithrombin-III OS=Bos taurus OX=9913 GN=SERPINC1 PE=1 SV=2;>P41361 SWISS-PROT:P41361 (Bos taurus) Antithrombin-III precursor	2	17	17	17	8	11	0	0	0	1	7	7	9	8	16	17	7	6	12	11	8	11	0	0	0	1	7	7	9	8	16	17	7	6	12	11	8	11	0	0	0	1	7	7
sp|P62894|CYC_BOVIN;CON__P62894	sp|P62894|CYC_BOVIN;CON__P62894	11;11	11;11	11;11	>sp|P62894|CYC_BOVIN Cytochrome c OS=Bos taurus OX=9913 GN=CYCS PE=1 SV=2;>P62894 SWISS-PROT:P62894 Cytochrome c - Bos taurus (Bovine).	2	11	11	11	11	11	11	11	11	11	11	9	10	10	6	6	9	9	10	10	11	11	11	11	11	11	11	9	10	10	6	6	9	9	10	10	11	11	11	11	11	11	11	9
sp|Q03247|APOE_BOVIN;CON__Q03247	sp|Q03247|APOE_BOVIN;CON__Q03247	18;18	18;18	18;18	>sp|Q03247|APOE_BOVIN Apolipoprotein E OS=Bos taurus OX=9913 GN=APOE PE=1 SV=1;>Q03247 SWISS-PROT:Q03247 (Bos taurus) Apolipoprotein E precursor	2	18	18	18	14	14	18	17	14	14	13	13	15	15	13	13	17	18	14	14	14	14	18	17	14	14	13	13	15	15	13	13	17	18	14	14	14	14	18	17	14	14	13	13
sp|Q05443|LUM_BOVIN;CON__Q05443	sp|Q05443|LUM_BOVIN;CON__Q05443	12;12	12;12	12;12	>sp|Q05443|LUM_BOVIN Lumican OS=Bos taurus OX=9913 GN=LUM PE=1 SV=1;>Q05443 SWISS-PROT:Q05443 (Bos taurus) Lumican precursor	2	12	12	12	8	9	0	0	0	0	0	4	5	7	12	12	4	6	10	11	8	9	0	0	0	0	0	4	5	7	12	12	4	6	10	11	8	9	0	0	0	0	0	4
CON__Q05B55	CON__Q05B55	9	9	9	>Q05B55 TREMBL:Q05B55 (Bos taurus) Similar to Ig kappa chain C region	1	9	9	9	7	7	2	2	1	1	3	5	9	7	8	9	9	8	9	9	7	7	2	2	1	1	3	5	9	7	8	9	9	8	9	9	7	7	2	2	1	1	3	5
CON__Q0IIK2;CON__Q29443;sp|Q29443|TRFE_BOVIN;sp|P24627|TRFL_BOVIN;CON__Q2HJF0	CON__Q0IIK2;CON__Q29443;sp|Q29443|TRFE_BOVIN	65;64;64;3;2	65;64;64;3;2	65;64;64;3;2	>Q0IIK2 TREMBL:Q0IIK2 (Bos taurus) Transferrin;>Q29443 SWISS-PROT:Q29443 Serotransferrin - Bos taurus (Bovine).;>sp|Q29443|TRFE_BOVIN Serotransferrin OS=Bos taurus OX=9913 GN=TF PE=2 SV=1	5	65	65	65	51	52	45	51	53	52	34	35	53	50	59	61	50	50	60	58	51	52	45	51	53	52	34	35	53	50	59	61	50	50	60	58	51	52	45	51	53	52	34	35
sp|Q0VCM5|ITIH1_BOVIN;CON__Q0VCM5	sp|Q0VCM5|ITIH1_BOVIN;CON__Q0VCM5	6;6	6;6	6;6	>sp|Q0VCM5|ITIH1_BOVIN Inter-alpha-trypsin inhibitor heavy chain H1 OS=Bos taurus OX=9913 GN=ITIH1 PE=1 SV=1;>Q0VCM5 TREMBL:Q0VCM5 (Bos taurus) Similar to Inter-alpha-trypsin inhibitor heavy chain H1	2	6	6	6	2	2	0	0	0	0	0	0	1	1	5	6	1	1	1	2	2	2	0	0	0	0	0	0	1	1	5	6	1	1	1	2	2	2	0	0	0	0	0	0
CON__Q1RMK2;CON__ENSEMBL:ENSBTAP00000011227	CON__Q1RMK2	18;1	18;1	17;0	>Q1RMK2 TREMBL:Q1RMK2 (Bos taurus) IGHM protein	2	18	18	17	15	14	7	8	11	9	6	7	14	15	17	16	12	13	14	16	15	14	7	8	11	9	6	7	14	15	17	16	12	13	14	16	14	13	7	8	10	8	5	6
CON__Q1RMN8	CON__Q1RMN8	10	10	10	>Q1RMN8 TREMBL:Q1RMN8 (Bos taurus) Similar to Immunoglobulin lambda-like polypeptide 1	1	10	10	10	6	6	4	4	6	6	7	6	10	9	6	6	9	8	9	10	6	6	4	4	6	6	7	6	10	9	6	6	9	8	9	10	6	6	4	4	6	6	7	6
sp|Q28085|CFAH_BOVIN;CON__Q28085	sp|Q28085|CFAH_BOVIN;CON__Q28085	6;6	6;6	6;6	>sp|Q28085|CFAH_BOVIN Complement factor H OS=Bos taurus OX=9913 GN=CFH PE=1 SV=3;>Q28085 SWISS-PROT:Q28085 (Bos taurus) Complement factor H precursor	2	6	6	6	1	4	0	0	0	0	1	0	1	2	6	6	5	4	4	4	1	4	0	0	0	0	1	0	1	2	6	6	5	4	4	4	1	4	0	0	0	0	1	0
sp|Q28178|TSP1_BOVIN;CON__Q28194	sp|Q28178|TSP1_BOVIN;CON__Q28194	5;5	5;5	5;5	>sp|Q28178|TSP1_BOVIN Thrombospondin-1 OS=Bos taurus OX=9913 GN=THBS1 PE=2 SV=2;>Q28194 TREMBL:Q28194 (Bos taurus) Thrombospondin-1	2	5	5	5	0	0	0	0	0	0	0	0	0	0	5	5	0	0	0	0	0	0	0	0	0	0	0	0	0	0	5	5	0	0	0	0	0	0	0	0	0	0	0	0
sp|Q2KIT0|HP20_BOVIN;CON__Q2KIT0	sp|Q2KIT0|HP20_BOVIN;CON__Q2KIT0	5;5	5;5	5;5	>sp|Q2KIT0|HP20_BOVIN Protein HP-20 homolog OS=Bos taurus OX=9913 PE=2 SV=1;>Q2KIT0 TREMBL:Q2KIT0 (Bos taurus) Similar to collagen, type X, alpha 1	2	5	5	5	4	4	1	1	0	0	1	1	3	2	5	4	2	3	3	4	4	4	1	1	0	0	1	1	3	2	5	4	2	3	3	4	4	4	1	1	0	0	1	1
sp|Q2KJF1|A1BG_BOVIN;CON__Q2KJF1	sp|Q2KJF1|A1BG_BOVIN;CON__Q2KJF1	12;12	12;12	12;12	>sp|Q2KJF1|A1BG_BOVIN Alpha-1B-glycoprotein OS=Bos taurus OX=9913 GN=A1BG PE=1 SV=1;>Q2KJF1 TREMBL:Q2KJF1 (Bos taurus) Alpha-1-B glycoprotein	2	12	12	12	10	9	1	1	0	0	2	6	11	9	12	11	9	11	12	12	10	9	1	1	0	0	2	6	11	9	12	11	9	11	12	12	10	9	1	1	0	0	2	6
sp|Q32PJ2|APOA4_BOVIN;CON__Q32PJ2	sp|Q32PJ2|APOA4_BOVIN;CON__Q32PJ2	7;7	7;7	7;7	>sp|Q32PJ2|APOA4_BOVIN Apolipoprotein A-IV OS=Bos taurus OX=9913 GN=APOA4 PE=2 SV=1;>Q32PJ2 SWISS-PROT:Q32PJ2 (Bos taurus) Apolipoprotein A-IV precursor	2	7	7	7	6	4	1	1	2	1	2	2	2	1	7	6	3	2	4	4	6	4	1	1	2	1	2	2	2	1	7	6	3	2	4	4	6	4	1	1	2	1	2	2
CON__Q3KUS7;sp|P81187|CFAB_BOVIN	CON__Q3KUS7;sp|P81187|CFAB_BOVIN	6;6	6;6	6;6	>Q3KUS7 TREMBL:Q3KUS7 (Bos taurus) Complement factor B;>sp|P81187|CFAB_BOVIN Complement factor B OS=Bos taurus OX=9913 GN=CFB PE=1 SV=2	2	6	6	6	1	2	1	1	2	2	3	2	4	2	6	6	2	1	4	1	1	2	1	1	2	2	3	2	4	2	6	6	2	1	4	1	1	2	1	1	2	2	3	2
sp|Q3SX14|GELS_BOVIN;CON__Q3SX14	sp|Q3SX14|GELS_BOVIN;CON__Q3SX14	26;26	26;26	26;26	>sp|Q3SX14|GELS_BOVIN Gelsolin OS=Bos taurus OX=9913 GN=GSN PE=2 SV=1;>Q3SX14 TREMBL:Q3SX14 (Bos taurus) Similar to Gelsolin	2	26	26	26	17	20	17	18	16	18	20	18	20	18	23	25	15	16	21	21	17	20	17	18	16	18	20	18	20	18	23	25	15	16	21	21	17	20	17	18	16	18	20	18
CON__Q3SX28;sp|Q5KR48|TPM2_BOVIN	CON__Q3SX28;sp|Q5KR48|TPM2_BOVIN	40;34	40;34	25;19	>Q3SX28 TREMBL:Q3SX28;Q5KR48 (Bos taurus) Tropomyosin 2;>sp|Q5KR48|TPM2_BOVIN Tropomyosin beta chain OS=Bos taurus OX=9913 GN=TPM2 PE=2 SV=1	2	40	40	25	30	33	10	10	9	9	26	24	29	27	40	38	24	21	37	36	30	33	10	10	9	9	26	24	29	27	40	38	24	21	37	36	15	18	1	0	0	1	11	11
sp|Q3SZR3|A1AG_BOVIN;CON__Q3SZR3	sp|Q3SZR3|A1AG_BOVIN;CON__Q3SZR3	7;7	7;7	7;7	>sp|Q3SZR3|A1AG_BOVIN Alpha-1-acid glycoprotein OS=Bos taurus OX=9913 GN=ORM1 PE=2 SV=1;>Q3SZR3 SWISS-PROT:Q3SZR3 (Bos taurus) Alpha-1-acid glycoprotein precursor	2	7	7	7	5	5	1	1	2	2	2	2	7	7	6	6	3	2	4	4	5	5	1	1	2	2	2	2	7	7	6	6	3	2	4	4	5	5	1	1	2	2	2	2
sp|Q3SZV7|HEMO_BOVIN;CON__Q3SZV7	sp|Q3SZV7|HEMO_BOVIN;CON__Q3SZV7	13;13	13;13	13;13	>sp|Q3SZV7|HEMO_BOVIN Hemopexin OS=Bos taurus OX=9913 GN=HPX PE=2 SV=1;>Q3SZV7 TREMBL:Q3SZV7 (Bos taurus) Similar to hemopexin	2	13	13	13	10	6	1	1	7	6	5	4	11	9	11	11	11	9	12	13	10	6	1	1	7	6	5	4	11	9	11	11	11	9	12	13	10	6	1	1	7	6	5	4
sp|Q3T052|ITIH4_BOVIN;CON__Q3T052	sp|Q3T052|ITIH4_BOVIN;CON__Q3T052	10;10	10;10	10;10	>sp|Q3T052|ITIH4_BOVIN Inter-alpha-trypsin inhibitor heavy chain H4 OS=Bos taurus OX=9913 GN=ITIH4 PE=1 SV=1;>Q3T052 TREMBL:Q3T052;Q5EA67 (Bos taurus) Inter-alpha (Globulin) inhibitor H4	2	10	10	10	1	3	0	0	0	0	2	0	8	9	10	10	2	2	5	6	1	3	0	0	0	0	2	0	8	9	10	10	2	2	5	6	1	3	0	0	0	0	2	0
CON__Q86YZ3	CON__Q86YZ3	12	12	12	>Q86YZ3 SWISS-PROT:Q86YZ3 Tax_Id=9606 Gene_Symbol=HRNR Hornerin	1	12	12	12	8	8	4	6	7	5	9	10	10	11	10	11	0	0	11	9	8	8	4	6	7	5	9	10	10	11	10	11	0	0	11	9	8	8	4	6	7	5	9	10
CON__Q9TRI1	CON__Q9TRI1	8	8	8	>Q9TRI1 TREMBL:Q9TRI1 (Bos taurus) similar to inter-alpha-trypsin inhibitor heavy chain2	1	8	8	8	6	4	0	0	0	0	3	1	1	4	8	8	5	2	4	7	6	4	0	0	0	0	3	1	1	4	8	8	5	2	4	7	6	4	0	0	0	0	3	1
sp|Q9TTE1|SPA31_BOVIN;sp|A2I7M9|SPA32_BOVIN;CON__Q9TTE1	sp|Q9TTE1|SPA31_BOVIN;sp|A2I7M9|SPA32_BOVIN;CON__Q9TTE1	9;9;9	9;9;9	5;5;5	>sp|Q9TTE1|SPA31_BOVIN Serpin A3-1 OS=Bos taurus OX=9913 GN=SERPINA3-1 PE=1 SV=3;>sp|A2I7M9|SPA32_BOVIN Serpin A3-2 OS=Bos taurus OX=9913 GN=SERPINA3-2 PE=3 SV=1;>Q9TTE1 SWISS-PROT:Q9TTE1 (Bos taurus) Endopin-1 precursor	3	9	9	5	5	5	2	1	2	3	3	4	7	7	7	8	4	5	9	7	5	5	2	1	2	3	3	4	7	7	7	8	4	5	9	7	3	3	1	0	1	2	1	2
CON__REFSEQ:XP_001252647	CON__REFSEQ:XP_001252647	10	10	3	>REFSEQ:XP_001252647 (Bos taurus) similar to endopin 2B	1	10	10	3	5	6	4	1	2	2	5	6	9	9	7	5	8	8	9	10	5	6	4	1	2	2	5	6	9	9	7	5	8	8	9	10	0	0	0	0	0	0	0	0
REV__sp|A6QQJ3|PERI_BOVIN	REV__sp|A6QQJ3|PERI_BOVIN	4	4	4	>sp|A6QQJ3|PERI_BOVIN Peripherin OS=Bos taurus OX=9913 GN=PRPH PE=2 SV=1	1	4	4	4	2	2	2	2	2	3	2	2	2	3	1	1	1	1	1	2	2	2	2	2	2	3	2	2	2	3	1	1	1	1	1	2	2	2	2	2	2	3	2	2
sp|A1A4J1|PFKAL_BOVIN	sp|A1A4J1|PFKAL_BOVIN	14	11	11	>sp|A1A4J1|PFKAL_BOVIN ATP-dependent 6-phosphofructokinase, liver type OS=Bos taurus OX=9913 GN=PFKL PE=2 SV=1	1	14	11	11	12	11	13	11	13	13	12	11	14	13	8	6	12	11	12	12	9	8	10	8	10	10	9	9	11	10	6	4	9	9	9	9	9	8	10	8	10	10	9	9
sp|A2VDL4|SATT_BOVIN	sp|A2VDL4|SATT_BOVIN	5	5	5	>sp|A2VDL4|SATT_BOVIN Neutral amino acid transporter A OS=Bos taurus OX=9913 GN=SLC1A4 PE=2 SV=1	1	5	5	5	4	4	2	3	4	5	4	5	5	5	1	3	5	5	4	5	4	4	2	3	4	5	4	5	5	5	1	3	5	5	4	5	4	4	2	3	4	5	4	5
sp|A2VDL6|AT1A2_BOVIN	sp|A2VDL6|AT1A2_BOVIN	63	40	39	>sp|A2VDL6|AT1A2_BOVIN Sodium/potassium-transporting ATPase subunit alpha-2 OS=Bos taurus OX=9913 GN=ATP1A2 PE=1 SV=1	1	63	40	39	61	59	62	59	61	60	61	61	62	60	47	50	59	60	59	59	38	37	39	36	38	37	39	38	39	37	28	30	36	38	38	36	38	37	39	36	38	37	39	38
sp|A2VDZ9|VAPB_BOVIN	sp|A2VDZ9|VAPB_BOVIN	10	10	9	>sp|A2VDZ9|VAPB_BOVIN Vesicle-associated membrane protein-associated protein B OS=Bos taurus OX=9913 GN=VAPB PE=2 SV=1	1	10	10	9	8	8	8	10	9	9	9	10	9	9	7	7	10	9	8	9	8	8	8	10	9	9	9	10	9	9	7	7	10	9	8	9	7	7	7	9	8	8	8	9
sp|A2VE21|COPG2_BOVIN;sp|P53620|COPG1_BOVIN	sp|A2VE21|COPG2_BOVIN;sp|P53620|COPG1_BOVIN	4;2	4;2	4;2	>sp|A2VE21|COPG2_BOVIN Coatomer subunit gamma-2 OS=Bos taurus OX=9913 GN=COPG2 PE=2 SV=1;>sp|P53620|COPG1_BOVIN Coatomer subunit gamma-1 OS=Bos taurus OX=9913 GN=COPG1 PE=1 SV=1	2	4	4	4	2	2	3	3	3	4	2	1	2	3	1	0	2	3	1	1	2	2	3	3	3	4	2	1	2	3	1	0	2	3	1	1	2	2	3	3	3	4	2	1
sp|A2VE58|SNG3_BOVIN	sp|A2VE58|SNG3_BOVIN	4	4	4	>sp|A2VE58|SNG3_BOVIN Synaptogyrin-3 OS=Bos taurus OX=9913 GN=SYNGR3 PE=2 SV=1	1	4	4	4	3	4	4	4	4	4	4	4	4	4	2	3	4	4	4	4	3	4	4	4	4	4	4	4	4	4	2	3	4	4	4	4	3	4	4	4	4	4	4	4
sp|A2VE99|SEP11_BOVIN	sp|A2VE99|SEP11_BOVIN	28	28	14	>sp|A2VE99|SEP11_BOVIN Septin-11 OS=Bos taurus OX=9913 GN=SEPTIN11 PE=2 SV=1	1	28	28	14	24	25	24	26	24	25	26	24	26	26	24	23	26	23	25	26	24	25	24	26	24	25	26	24	26	26	24	23	26	23	25	26	13	14	12	14	14	14	14	12
sp|A3KMV5|UBA1_BOVIN	sp|A3KMV5|UBA1_BOVIN	29	29	29	>sp|A3KMV5|UBA1_BOVIN Ubiquitin-like modifier-activating enzyme 1 OS=Bos taurus OX=9913 GN=UBA1 PE=2 SV=1	1	29	29	29	27	25	26	26	27	28	25	27	27	27	17	18	27	26	27	26	27	25	26	26	27	28	25	27	27	27	17	18	27	26	27	26	27	25	26	26	27	28	25	27
sp|A3KN12|PUR8_BOVIN	sp|A3KN12|PUR8_BOVIN	5	5	5	>sp|A3KN12|PUR8_BOVIN Adenylosuccinate lyase OS=Bos taurus OX=9913 GN=ADSL PE=2 SV=1	1	5	5	5	4	4	3	3	3	3	3	2	2	2	4	4	2	1	1	1	4	4	3	3	3	3	3	2	2	2	4	4	2	1	1	1	4	4	3	3	3	3	3	2
sp|A3KN22|UBC12_BOVIN	sp|A3KN22|UBC12_BOVIN	5	5	5	>sp|A3KN22|UBC12_BOVIN NEDD8-conjugating enzyme Ubc12 OS=Bos taurus OX=9913 GN=UBE2M PE=2 SV=1	1	5	5	5	3	4	5	4	3	5	4	3	4	5	2	0	4	4	4	3	3	4	5	4	3	5	4	3	4	5	2	0	4	4	4	3	3	4	5	4	3	5	4	3
sp|A4FUA8|CAZA1_BOVIN	sp|A4FUA8|CAZA1_BOVIN	6	5	5	>sp|A4FUA8|CAZA1_BOVIN F-actin-capping protein subunit alpha-1 OS=Bos taurus OX=9913 GN=CAPZA1 PE=2 SV=1	1	6	5	5	6	6	6	6	6	6	6	6	6	5	4	3	5	6	5	5	5	5	5	5	5	5	5	5	5	4	3	2	4	5	5	4	5	5	5	5	5	5	5	5
sp|A4FUY1|HECAM_BOVIN	sp|A4FUY1|HECAM_BOVIN	6	6	6	>sp|A4FUY1|HECAM_BOVIN Hepatocyte cell adhesion molecule OS=Bos taurus OX=9913 GN=HEPACAM PE=2 SV=1	1	6	6	6	6	6	6	6	6	6	6	6	6	6	5	4	6	6	6	6	6	6	6	6	6	6	6	6	6	6	5	4	6	6	6	6	6	6	6	6	6	6	6	6
sp|A4FV52|VGLU1_BOVIN	sp|A4FV52|VGLU1_BOVIN	10	10	9	>sp|A4FV52|VGLU1_BOVIN Vesicular glutamate transporter 1 OS=Bos taurus OX=9913 GN=SLC17A7 PE=2 SV=1	1	10	10	9	10	7	5	7	9	7	8	10	9	10	4	4	8	7	9	8	10	7	5	7	9	7	8	10	9	10	4	4	8	7	9	8	9	7	5	7	9	7	8	9
sp|A4IF63|TRIM2_BOVIN	sp|A4IF63|TRIM2_BOVIN	21	21	21	>sp|A4IF63|TRIM2_BOVIN Tripartite motif-containing protein 2 OS=Bos taurus OX=9913 GN=TRIM2 PE=2 SV=1	1	21	21	21	14	15	17	17	17	17	15	14	15	18	6	6	17	15	15	15	14	15	17	17	17	17	15	14	15	18	6	6	17	15	15	15	14	15	17	17	17	17	15	14
sp|A4IF97|ML12B_BOVIN;sp|Q5E9E2|MYL9_BOVIN	sp|A4IF97|ML12B_BOVIN;sp|Q5E9E2|MYL9_BOVIN	8;8	8;8	8;8	>sp|A4IF97|ML12B_BOVIN Myosin regulatory light chain 12B OS=Bos taurus OX=9913 GN=MYL12B PE=2 SV=1;>sp|Q5E9E2|MYL9_BOVIN Myosin regulatory light polypeptide 9 OS=Bos taurus OX=9913 GN=MYL9 PE=2 SV=3	2	8	8	8	5	5	6	6	6	6	7	5	6	7	7	7	6	6	7	7	5	5	6	6	6	6	7	5	6	7	7	7	6	6	7	7	5	5	6	6	6	6	7	5
sp|A4IFA7|CBR4_BOVIN	sp|A4IFA7|CBR4_BOVIN	4	4	4	>sp|A4IFA7|CBR4_BOVIN 3-oxoacyl-[acyl-carrier-protein] reductase OS=Bos taurus OX=9913 GN=CBR4 PE=2 SV=1	1	4	4	4	2	3	1	2	3	4	3	2	3	3	0	0	1	0	1	1	2	3	1	2	3	4	3	2	3	3	0	0	1	0	1	1	2	3	1	2	3	4	3	2
sp|A4IFD0|KAD5_BOVIN	sp|A4IFD0|KAD5_BOVIN	8	7	7	>sp|A4IFD0|KAD5_BOVIN Adenylate kinase isoenzyme 5 OS=Bos taurus OX=9913 GN=Ak5 PE=2 SV=1	1	8	7	7	5	5	5	6	5	5	6	5	6	6	1	2	6	6	3	4	4	4	4	5	4	4	5	4	5	5	1	2	5	5	3	4	4	4	4	5	4	4	5	4
sp|A4IFE3|ACTY_BOVIN	sp|A4IFE3|ACTY_BOVIN	7	7	7	>sp|A4IFE3|ACTY_BOVIN Beta-centractin OS=Bos taurus OX=9913 GN=ACTR1B PE=2 SV=1	1	7	7	7	7	6	7	7	7	7	7	7	7	7	4	3	7	6	7	6	7	6	7	7	7	7	7	7	7	7	4	3	7	6	7	6	7	6	7	7	7	7	7	7
sp|A5D7A0|EFHD2_BOVIN;sp|Q17QM6|EFHD1_BOVIN	sp|A5D7A0|EFHD2_BOVIN	4;1	4;1	4;1	>sp|A5D7A0|EFHD2_BOVIN EF-hand domain-containing protein D2 OS=Bos taurus OX=9913 GN=EFHD2 PE=2 SV=1	2	4	4	4	4	3	4	4	4	4	4	4	4	4	2	3	4	4	3	3	4	3	4	4	4	4	4	4	4	4	2	3	4	4	3	3	4	3	4	4	4	4	4	4
sp|A5D7D1|ACTN4_BOVIN	sp|A5D7D1|ACTN4_BOVIN	52	33	33	>sp|A5D7D1|ACTN4_BOVIN Alpha-actinin-4 OS=Bos taurus OX=9913 GN=ACTN4 PE=2 SV=1	1	52	33	33	45	44	46	48	49	43	45	46	49	47	37	36	41	40	46	46	27	25	27	29	30	26	27	27	31	29	23	22	22	22	28	28	27	25	27	29	30	26	27	27
sp|A5D7H3|CTL2_BOVIN	sp|A5D7H3|CTL2_BOVIN	5	5	5	>sp|A5D7H3|CTL2_BOVIN Choline transporter-like protein 2 OS=Bos taurus OX=9913 GN=SLC44A2 PE=2 SV=1	1	5	5	5	5	4	4	3	4	4	4	5	4	3	1	3	4	5	5	3	5	4	4	3	4	4	4	5	4	3	1	3	4	5	5	3	5	4	4	3	4	4	4	5
sp|A5PJI5|GET3_BOVIN	sp|A5PJI5|GET3_BOVIN	4	4	4	>sp|A5PJI5|GET3_BOVIN ATPase GET3 OS=Bos taurus OX=9913 GN=GET3 PE=2 SV=1	1	4	4	4	3	3	3	3	4	4	3	3	3	3	1	1	4	1	2	1	3	3	3	3	4	4	3	3	3	3	1	1	4	1	2	1	3	3	3	3	4	4	3	3
sp|A5PK65|DOPD_BOVIN	sp|A5PK65|DOPD_BOVIN	4	4	4	>sp|A5PK65|DOPD_BOVIN D-dopachrome decarboxylase OS=Bos taurus OX=9913 GN=DDT PE=3 SV=1	1	4	4	4	2	3	4	3	4	3	3	4	4	3	0	1	4	3	3	2	2	3	4	3	4	3	3	4	4	3	0	1	4	3	3	2	2	3	4	3	4	3	3	4
sp|A5PKL1|OXR1_BOVIN	sp|A5PKL1|OXR1_BOVIN	14	14	14	>sp|A5PKL1|OXR1_BOVIN Oxidation resistance protein 1 OS=Bos taurus OX=9913 GN=OXR1 PE=2 SV=2	1	14	14	14	8	10	8	9	11	12	12	9	10	10	2	2	12	9	9	9	8	10	8	9	11	12	12	9	10	10	2	2	12	9	9	9	8	10	8	9	11	12	12	9
sp|A6H767|NP1L1_BOVIN	sp|A6H767|NP1L1_BOVIN	8	6	6	>sp|A6H767|NP1L1_BOVIN Nucleosome assembly protein 1-like 1 OS=Bos taurus OX=9913 GN=NAP1L1 PE=2 SV=1	1	8	6	6	5	5	6	7	8	7	8	8	8	8	4	5	7	7	7	7	3	4	4	5	6	5	6	6	6	6	3	4	6	6	5	6	3	4	4	5	6	5	6	6
sp|A6H769|RS7_BOVIN	sp|A6H769|RS7_BOVIN	5	5	5	>sp|A6H769|RS7_BOVIN 40S ribosomal protein S7 OS=Bos taurus OX=9913 GN=RPS7 PE=1 SV=1	1	5	5	5	5	4	5	5	5	5	5	5	5	5	3	3	5	4	5	5	5	4	5	5	5	5	5	5	5	5	3	3	5	4	5	5	5	4	5	5	5	5	5	5
sp|A6H7B5|CSN3_BOVIN	sp|A6H7B5|CSN3_BOVIN	4	4	4	>sp|A6H7B5|CSN3_BOVIN COP9 signalosome complex subunit 3 OS=Bos taurus OX=9913 GN=COPS3 PE=2 SV=1	1	4	4	4	3	3	3	3	3	3	2	3	3	3	2	2	3	4	3	3	3	3	3	3	3	3	2	3	3	3	2	2	3	4	3	3	3	3	3	3	3	3	2	3
sp|A6H7G2|DBNL_BOVIN	sp|A6H7G2|DBNL_BOVIN	11	11	11	>sp|A6H7G2|DBNL_BOVIN Drebrin-like protein OS=Bos taurus OX=9913 GN=DBNL PE=2 SV=1	1	11	11	11	5	7	6	8	9	8	7	8	5	6	5	3	7	7	6	5	5	7	6	8	9	8	7	8	5	6	5	3	7	7	6	5	5	7	6	8	9	8	7	8
sp|A6H7I5|DYN2_BOVIN	sp|A6H7I5|DYN2_BOVIN	14	4	4	>sp|A6H7I5|DYN2_BOVIN Dynamin-2 OS=Bos taurus OX=9913 GN=DNM2 PE=2 SV=1	1	14	4	4	12	11	12	13	12	14	12	12	12	12	4	5	13	12	11	12	3	2	2	3	3	4	3	2	2	2	1	1	3	2	3	3	3	2	2	3	3	4	3	2
sp|A6QLG5|RS9_BOVIN	sp|A6QLG5|RS9_BOVIN	4	4	4	>sp|A6QLG5|RS9_BOVIN 40S ribosomal protein S9 OS=Bos taurus OX=9913 GN=RPS9 PE=2 SV=1	1	4	4	4	3	3	3	2	3	3	3	3	3	3	2	2	4	3	3	3	3	3	3	2	3	3	3	3	3	3	2	2	4	3	3	3	3	3	3	2	3	3	3	3
sp|A6QLP2|SAHH3_BOVIN	sp|A6QLP2|SAHH3_BOVIN	8	7	7	>sp|A6QLP2|SAHH3_BOVIN Adenosylhomocysteinase 3 OS=Bos taurus OX=9913 GN=AHCYL2 PE=1 SV=1	1	8	7	7	7	7	7	7	8	8	7	7	7	7	4	4	8	7	6	7	6	6	6	6	7	7	6	6	6	6	4	4	7	6	6	7	6	6	6	6	7	7	6	6
sp|A6QLR4|FLOT2_BOVIN	sp|A6QLR4|FLOT2_BOVIN	6	6	6	>sp|A6QLR4|FLOT2_BOVIN Flotillin-2 OS=Bos taurus OX=9913 GN=FLOT2 PE=2 SV=1	1	6	6	6	4	4	6	5	5	6	4	2	5	6	3	3	4	3	4	3	4	4	6	5	5	6	4	2	5	6	3	3	4	3	4	3	4	4	6	5	5	6	4	2
sp|A6QLU1|GPDM_BOVIN	sp|A6QLU1|GPDM_BOVIN	12	12	12	>sp|A6QLU1|GPDM_BOVIN Glycerol-3-phosphate dehydrogenase, mitochondrial OS=Bos taurus OX=9913 GN=GPD2 PE=2 SV=1	1	12	12	12	8	8	10	8	10	10	9	10	11	10	6	5	9	8	10	7	8	8	10	8	10	10	9	10	11	10	6	5	9	8	10	7	8	8	10	8	10	10	9	10
sp|A6QLY7|PBIP1_BOVIN	sp|A6QLY7|PBIP1_BOVIN	6	6	6	>sp|A6QLY7|PBIP1_BOVIN Pre-B-cell leukemia transcription factor-interacting protein 1 OS=Bos taurus OX=9913 GN=PBXIP1 PE=2 SV=1	1	6	6	6	3	4	5	4	4	6	4	5	5	4	1	1	4	4	4	6	3	4	5	4	4	6	4	5	5	4	1	1	4	4	4	6	3	4	5	4	4	6	4	5
sp|A6QNS3|ABR_BOVIN	sp|A6QNS3|ABR_BOVIN	7	7	7	>sp|A6QNS3|ABR_BOVIN Active breakpoint cluster region-related protein OS=Bos taurus OX=9913 GN=ABR PE=2 SV=1	1	7	7	7	5	5	6	7	7	7	6	7	7	7	3	2	6	6	7	5	5	5	6	7	7	7	6	7	7	7	3	2	6	6	7	5	5	5	6	7	7	7	6	7
sp|A6QQ21|CSN6_BOVIN	sp|A6QQ21|CSN6_BOVIN	5	5	5	>sp|A6QQ21|CSN6_BOVIN COP9 signalosome complex subunit 6 OS=Bos taurus OX=9913 GN=COPS6 PE=2 SV=1	1	5	5	5	4	2	4	5	3	3	4	4	4	4	1	1	3	3	3	2	4	2	4	5	3	3	4	4	4	4	1	1	3	3	3	2	4	2	4	5	3	3	4	4
sp|A6QQZ0|GDAP1_BOVIN	sp|A6QQZ0|GDAP1_BOVIN	8	8	8	>sp|A6QQZ0|GDAP1_BOVIN Ganglioside-induced differentiation-associated protein 1 OS=Bos taurus OX=9913 GN=GDAP1 PE=2 SV=1	1	8	8	8	4	5	8	7	8	7	5	5	6	6	2	2	6	4	4	5	4	5	8	7	8	7	5	5	6	6	2	2	6	4	4	5	4	5	8	7	8	7	5	5
sp|A6QR46|RAB6B_BOVIN	sp|A6QR46|RAB6B_BOVIN	8	8	8	>sp|A6QR46|RAB6B_BOVIN Ras-related protein Rab-6B OS=Bos taurus OX=9913 GN=RAB6B PE=2 SV=1	1	8	8	8	7	7	7	7	8	7	7	7	7	7	4	3	7	7	7	7	7	7	7	7	8	7	7	7	7	7	4	3	7	7	7	7	7	7	7	7	8	7	7	7
sp|A7MB35|ODPA_BOVIN	sp|A7MB35|ODPA_BOVIN	21	21	21	>sp|A7MB35|ODPA_BOVIN Pyruvate dehydrogenase E1 component subunit alpha, somatic form, mitochondrial OS=Bos taurus OX=9913 GN=PDHA1 PE=2 SV=1	1	21	21	21	14	14	17	18	17	19	15	14	20	19	9	10	14	14	15	13	14	14	17	18	17	19	15	14	20	19	9	10	14	14	15	13	14	14	17	18	17	19	15	14
sp|A7MB62|ARP2_BOVIN	sp|A7MB62|ARP2_BOVIN	15	15	15	>sp|A7MB62|ARP2_BOVIN Actin-related protein 2 OS=Bos taurus OX=9913 GN=ACTR2 PE=1 SV=1	1	15	15	15	9	10	12	12	14	13	8	7	13	12	4	4	10	10	9	9	9	10	12	12	14	13	8	7	13	12	4	4	10	10	9	9	9	10	12	12	14	13	8	7
sp|A7MBI0|PACN1_BOVIN	sp|A7MBI0|PACN1_BOVIN	27	27	27	>sp|A7MBI0|PACN1_BOVIN Protein kinase C and casein kinase substrate in neurons protein 1 OS=Bos taurus OX=9913 GN=PACSIN1 PE=2 SV=1	1	27	27	27	23	25	25	24	25	25	25	24	26	27	14	18	26	25	23	26	23	25	25	24	25	25	25	24	26	27	14	18	26	25	23	26	23	25	25	24	25	25	25	24
sp|A7MBJ5|CAND1_BOVIN	sp|A7MBJ5|CAND1_BOVIN	33	33	33	>sp|A7MBJ5|CAND1_BOVIN Cullin-associated NEDD8-dissociated protein 1 OS=Bos taurus OX=9913 GN=CAND1 PE=2 SV=1	1	33	33	33	28	28	23	23	27	27	25	29	29	31	13	10	26	27	23	25	28	28	23	23	27	27	25	29	29	31	13	10	26	27	23	25	28	28	23	23	27	27	25	29
sp|A7YWE4|AL4A1_BOVIN	sp|A7YWE4|AL4A1_BOVIN	5	5	5	>sp|A7YWE4|AL4A1_BOVIN Delta-1-pyrroline-5-carboxylate dehydrogenase, mitochondrial OS=Bos taurus OX=9913 GN=ALDH4A1 PE=2 SV=1	1	5	5	5	3	4	3	3	2	2	2	4	4	4	3	3	3	3	4	3	3	4	3	3	2	2	2	4	4	4	3	3	3	3	4	3	3	4	3	3	2	2	2	4
sp|D3K0R6|AT2B4_BOVIN	sp|D3K0R6|AT2B4_BOVIN	40	40	40	>sp|D3K0R6|AT2B4_BOVIN Plasma membrane calcium-transporting ATPase 4 OS=Bos taurus OX=9913 GN=ATP2B4 PE=1 SV=2	1	40	40	40	34	33	31	31	35	34	35	34	37	34	19	18	33	36	36	37	34	33	31	31	35	34	35	34	37	34	19	18	33	36	36	37	34	33	31	31	35	34	35	34
sp|F1MH24|AAK1_BOVIN	sp|F1MH24|AAK1_BOVIN	9	9	9	>sp|F1MH24|AAK1_BOVIN AP2-associated protein kinase 1 OS=Bos taurus OX=9913 GN=AAK1 PE=1 SV=2	1	9	9	9	7	8	7	5	7	8	8	8	8	8	0	1	6	6	5	8	7	8	7	5	7	8	8	8	8	8	0	1	6	6	5	8	7	8	7	5	7	8	8	8
sp|F1MVX2|LANC1_BOVIN	sp|F1MVX2|LANC1_BOVIN	20	20	20	>sp|F1MVX2|LANC1_BOVIN Glutathione S-transferase LANCL1 OS=Bos taurus OX=9913 GN=LANCL1 PE=1 SV=2	1	20	20	20	18	17	19	19	18	18	13	13	20	18	5	7	17	15	16	15	18	17	19	19	18	18	13	13	20	18	5	7	17	15	16	15	18	17	19	19	18	18	13	13
sp|F1N5C8|ENPP6_BOVIN	sp|F1N5C8|ENPP6_BOVIN	8	8	8	>sp|F1N5C8|ENPP6_BOVIN Glycerophosphocholine choline phosphodiesterase ENPP6 OS=Bos taurus OX=9913 GN=ENPP6 PE=1 SV=2	1	8	8	8	3	5	8	8	7	8	3	4	5	4	2	1	1	0	2	4	3	5	8	8	7	8	3	4	5	4	2	1	1	0	2	4	3	5	8	8	7	8	3	4
sp|O02675|DPYL2_BOVIN	sp|O02675|DPYL2_BOVIN	42	42	42	>sp|O02675|DPYL2_BOVIN Dihydropyrimidinase-related protein 2 OS=Bos taurus OX=9913 GN=DPYSL2 PE=1 SV=1	1	42	42	42	41	42	39	39	41	42	40	41	41	41	35	35	39	40	40	40	41	42	39	39	41	42	40	41	41	41	35	35	39	40	40	40	41	42	39	39	41	42	40	41
sp|O02691|HCD2_BOVIN	sp|O02691|HCD2_BOVIN	13	13	13	>sp|O02691|HCD2_BOVIN 3-hydroxyacyl-CoA dehydrogenase type-2 OS=Bos taurus OX=9913 GN=HSD17B10 PE=1 SV=3	1	13	13	13	11	12	11	12	12	12	11	12	12	13	11	10	11	10	12	12	11	12	11	12	12	12	11	12	12	13	11	10	11	10	12	12	11	12	11	12	12	12	11	12
sp|O02739|SPB6_BOVIN;sp|Q5BIR5|SPB8_BOVIN	sp|O02739|SPB6_BOVIN	7;1	7;1	6;0	>sp|O02739|SPB6_BOVIN Serpin B6 OS=Bos taurus OX=9913 GN=SERPINB6 PE=2 SV=1	2	7	7	6	4	5	4	5	4	5	7	7	7	7	3	4	5	4	5	3	4	5	4	5	4	5	7	7	7	7	3	4	5	4	5	3	3	4	3	4	3	4	6	6
sp|O02811|PI4KA_BOVIN	sp|O02811|PI4KA_BOVIN	5	5	5	>sp|O02811|PI4KA_BOVIN Phosphatidylinositol 4-kinase alpha OS=Bos taurus OX=9913 GN=PI4KA PE=2 SV=2	1	5	5	5	4	3	3	3	3	4	3	4	4	2	0	1	3	4	3	3	4	3	3	3	3	4	3	4	4	2	0	1	3	4	3	3	4	3	3	3	3	4	3	4
sp|O02853|PTGDS_BOVIN	sp|O02853|PTGDS_BOVIN	4	4	4	>sp|O02853|PTGDS_BOVIN Prostaglandin-H2 D-isomerase OS=Bos taurus OX=9913 GN=PTGDS PE=1 SV=1	1	4	4	4	4	4	4	4	4	4	4	4	4	4	3	3	4	4	3	4	4	4	4	4	4	4	4	4	4	4	3	3	4	4	3	4	4	4	4	4	4	4	4	4
sp|O18789|RS2_BOVIN	sp|O18789|RS2_BOVIN	5	5	5	>sp|O18789|RS2_BOVIN 40S ribosomal protein S2 OS=Bos taurus OX=9913 GN=RPS2 PE=2 SV=2	1	5	5	5	4	4	3	5	5	5	3	5	4	3	2	1	2	4	3	4	4	4	3	5	5	5	3	5	4	3	2	1	2	4	3	4	4	4	3	5	5	5	3	5
sp|O18964|SYNJ1_BOVIN	sp|O18964|SYNJ1_BOVIN	26	26	26	>sp|O18964|SYNJ1_BOVIN Synaptojanin-1 (Fragment) OS=Bos taurus OX=9913 GN=SYNJ1 PE=1 SV=2	1	26	26	26	21	24	25	25	26	26	22	24	24	26	14	15	24	24	19	20	21	24	25	25	26	26	22	24	24	26	14	15	24	24	19	20	21	24	25	25	26	26	22	24
sp|O41515|MLP3B_BOVIN	sp|O41515|MLP3B_BOVIN	6	6	4	>sp|O41515|MLP3B_BOVIN Microtubule-associated proteins 1A/1B light chain 3B OS=Bos taurus OX=9913 GN=MAP1LC3B PE=1 SV=4	1	6	6	4	6	4	5	6	6	4	5	4	5	5	2	2	6	5	5	4	6	4	5	6	6	4	5	4	5	5	2	2	6	5	5	4	4	2	3	4	4	2	3	2
sp|O46375|TTHY_BOVIN	sp|O46375|TTHY_BOVIN	8	8	8	>sp|O46375|TTHY_BOVIN Transthyretin OS=Bos taurus OX=9913 GN=TTR PE=1 SV=1	1	8	8	8	8	7	4	4	4	5	4	5	5	6	8	8	6	7	7	8	8	7	4	4	4	5	4	5	5	6	8	8	6	7	7	8	8	7	4	4	4	5	4	5
sp|O46414|FRIH_BOVIN	sp|O46414|FRIH_BOVIN	20	20	20	>sp|O46414|FRIH_BOVIN Ferritin heavy chain OS=Bos taurus OX=9913 GN=FTH1 PE=2 SV=3	1	20	20	20	18	18	18	20	18	16	16	17	18	19	12	12	18	15	17	16	18	18	18	20	18	16	16	17	18	19	12	12	18	15	17	16	18	18	18	20	18	16	16	17
sp|O46415|FRIL_BOVIN	sp|O46415|FRIL_BOVIN	9	9	9	>sp|O46415|FRIL_BOVIN Ferritin light chain OS=Bos taurus OX=9913 GN=FTL PE=2 SV=3	1	9	9	9	6	7	8	9	7	8	8	7	7	8	5	5	7	7	6	5	6	7	8	9	7	8	8	7	7	8	5	5	7	7	6	5	6	7	8	9	7	8	8	7
sp|O46510|EPB42_BOVIN	sp|O46510|EPB42_BOVIN	5	5	5	>sp|O46510|EPB42_BOVIN Protein 4.2 OS=Bos taurus OX=9913 GN=EPB42 PE=2 SV=3	1	5	5	5	3	3	1	1	1	1	3	3	1	1	3	4	5	4	2	4	3	3	1	1	1	1	3	3	1	1	3	4	5	4	2	4	3	3	1	1	1	1	3	3
sp|O46563|VATH_BOVIN	sp|O46563|VATH_BOVIN	14	14	14	>sp|O46563|VATH_BOVIN V-type proton ATPase subunit H OS=Bos taurus OX=9913 GN=ATP6V1H PE=1 SV=3	1	14	14	14	12	14	13	13	13	12	13	12	14	14	3	3	14	13	11	11	12	14	13	13	13	12	13	12	14	14	3	3	14	13	11	11	12	14	13	13	13	12	13	12
sp|O46629|ECHB_BOVIN	sp|O46629|ECHB_BOVIN	17	17	17	>sp|O46629|ECHB_BOVIN Trifunctional enzyme subunit beta, mitochondrial OS=Bos taurus OX=9913 GN=HADHB PE=2 SV=1	1	17	17	17	15	16	14	15	15	15	15	13	16	16	9	9	12	11	14	14	15	16	14	15	15	15	15	13	16	16	9	9	12	11	14	14	15	16	14	15	15	15	15	13
sp|O46631|SHPS1_BOVIN	sp|O46631|SHPS1_BOVIN	12	12	12	>sp|O46631|SHPS1_BOVIN Tyrosine-protein phosphatase non-receptor type substrate 1 OS=Bos taurus OX=9913 GN=SIRPA PE=2 SV=1	1	12	12	12	8	9	7	8	8	8	7	5	8	8	5	6	8	9	7	7	8	9	7	8	8	8	7	5	8	8	5	6	8	9	7	7	8	9	7	8	8	8	7	5
sp|O62654|DESM_BOVIN	sp|O62654|DESM_BOVIN	27	21	21	>sp|O62654|DESM_BOVIN Desmin OS=Bos taurus OX=9913 GN=DES PE=2 SV=3	1	27	21	21	15	15	4	6	5	5	13	13	15	16	23	23	10	10	22	23	9	9	0	1	0	0	7	7	9	10	17	17	4	4	16	17	9	9	0	1	0	0	7	7
sp|O62768|TRXR1_BOVIN	sp|O62768|TRXR1_BOVIN	5	5	4	>sp|O62768|TRXR1_BOVIN Thioredoxin reductase 1, cytoplasmic OS=Bos taurus OX=9913 GN=TXNRD1 PE=2 SV=3	1	5	5	4	4	4	4	5	5	4	3	4	5	5	3	3	4	4	4	5	4	4	4	5	5	4	3	4	5	5	3	3	4	4	4	5	3	3	3	4	4	3	3	3
sp|O77750|AQP4_BOVIN	sp|O77750|AQP4_BOVIN	7	7	7	>sp|O77750|AQP4_BOVIN Aquaporin-4 OS=Bos taurus OX=9913 GN=AQP4 PE=2 SV=3	1	7	7	7	7	7	7	6	7	7	7	7	7	7	6	6	7	7	7	7	7	7	7	6	7	7	7	7	7	7	6	6	7	7	7	7	7	7	7	6	7	7	7	7
sp|O77784|IDH3B_BOVIN	sp|O77784|IDH3B_BOVIN	13	13	13	>sp|O77784|IDH3B_BOVIN Isocitrate dehydrogenase [NAD] subunit beta, mitochondrial OS=Bos taurus OX=9913 GN=IDH3B PE=2 SV=2	1	13	13	13	13	12	10	12	12	10	12	12	13	12	2	4	11	10	10	12	13	12	10	12	12	10	12	12	13	12	2	4	11	10	10	12	13	12	10	12	12	10	12	12
sp|O77788|NFM_BOVIN	sp|O77788|NFM_BOVIN	88	88	82	>sp|O77788|NFM_BOVIN Neurofilament medium polypeptide OS=Bos taurus OX=9913 GN=NEFM PE=1 SV=3	1	88	88	82	80	82	81	84	81	78	62	64	63	60	41	42	52	46	41	42	80	82	81	84	81	78	62	64	63	60	41	42	52	46	41	42	74	76	76	78	75	72	56	58
sp|O77834|PRDX6_BOVIN	sp|O77834|PRDX6_BOVIN	17	17	17	>sp|O77834|PRDX6_BOVIN Peroxiredoxin-6 OS=Bos taurus OX=9913 GN=PRDX6 PE=1 SV=3	1	17	17	17	13	14	15	15	17	17	15	15	16	16	11	12	13	13	16	16	13	14	15	15	17	17	15	15	16	16	11	12	13	13	16	16	13	14	15	15	17	17	15	15
sp|O97680|THIO_BOVIN	sp|O97680|THIO_BOVIN	9	9	9	>sp|O97680|THIO_BOVIN Thioredoxin OS=Bos taurus OX=9913 GN=TXN PE=3 SV=3	1	9	9	9	6	7	9	9	9	9	7	6	8	8	6	7	7	7	7	8	6	7	9	9	9	9	7	6	8	8	6	7	7	7	7	8	6	7	9	9	9	9	7	6
sp|O97725|NDUAC_BOVIN	sp|O97725|NDUAC_BOVIN	5	5	5	>sp|O97725|NDUAC_BOVIN NADH dehydrogenase [ubiquinone] 1 alpha subcomplex subunit 12 OS=Bos taurus OX=9913 GN=NDUFA12 PE=1 SV=1	1	5	5	5	5	4	3	3	5	5	4	4	5	5	3	2	4	4	4	4	5	4	3	3	5	5	4	4	5	5	3	2	4	4	4	4	5	4	3	3	5	5	4	4
sp|O97764|QOR_BOVIN	sp|O97764|QOR_BOVIN	10	10	10	>sp|O97764|QOR_BOVIN Zeta-crystallin OS=Bos taurus OX=9913 GN=CRYZ PE=2 SV=2	1	10	10	10	9	10	9	10	10	9	10	9	10	9	7	7	10	10	8	8	9	10	9	10	10	9	10	9	10	9	7	7	10	10	8	8	9	10	9	10	10	9	10	9
sp|P00125|CY1_BOVIN	sp|P00125|CY1_BOVIN	9	9	9	>sp|P00125|CY1_BOVIN Cytochrome c1, heme protein, mitochondrial OS=Bos taurus OX=9913 GN=CYC1 PE=1 SV=2	1	9	9	9	9	8	8	9	9	9	9	9	9	8	6	6	9	8	9	8	9	8	8	9	9	9	9	9	9	8	6	6	9	8	9	8	9	8	8	9	9	9	9	9
sp|P00126|QCR6_BOVIN	sp|P00126|QCR6_BOVIN	4	4	4	>sp|P00126|QCR6_BOVIN Cytochrome b-c1 complex subunit 6, mitochondrial OS=Bos taurus OX=9913 GN=UQCRH PE=1 SV=2	1	4	4	4	4	4	4	4	4	4	4	4	4	4	4	3	4	4	4	4	4	4	4	4	4	4	4	4	4	4	4	3	4	4	4	4	4	4	4	4	4	4	4	4
sp|P00129|QCR7_BOVIN	sp|P00129|QCR7_BOVIN	13	13	13	>sp|P00129|QCR7_BOVIN Cytochrome b-c1 complex subunit 7 OS=Bos taurus OX=9913 GN=UQCRB PE=1 SV=3	1	13	13	13	10	10	11	13	11	12	12	12	11	12	7	6	9	11	10	12	10	10	11	13	11	12	12	12	11	12	7	6	9	11	10	12	10	10	11	13	11	12	12	12
sp|P00366|DHE3_BOVIN	sp|P00366|DHE3_BOVIN	31	31	31	>sp|P00366|DHE3_BOVIN Glutamate dehydrogenase 1, mitochondrial OS=Bos taurus OX=9913 GN=GLUD1 PE=1 SV=2	1	31	31	31	29	27	28	30	29	29	28	30	28	30	23	26	27	28	29	26	29	27	28	30	29	29	28	30	28	30	23	26	27	28	29	26	29	27	28	30	29	29	28	30
sp|P00423|COX41_BOVIN	sp|P00423|COX41_BOVIN	11	11	11	>sp|P00423|COX41_BOVIN Cytochrome c oxidase subunit 4 isoform 1, mitochondrial OS=Bos taurus OX=9913 GN=COX4I1 PE=1 SV=1	1	11	11	11	11	10	10	10	9	11	11	11	11	11	9	8	11	10	9	10	11	10	10	10	9	11	11	11	11	11	9	8	11	10	9	10	11	10	10	10	9	11	11	11
sp|P00426|COX5A_BOVIN	sp|P00426|COX5A_BOVIN	7	7	7	>sp|P00426|COX5A_BOVIN Cytochrome c oxidase subunit 5A, mitochondrial OS=Bos taurus OX=9913 GN=COX5A PE=1 SV=2	1	7	7	7	7	7	6	6	7	7	6	7	7	7	6	7	7	7	7	7	7	7	6	6	7	7	6	7	7	7	6	7	7	7	7	7	7	7	6	6	7	7	6	7
sp|P00428|COX5B_BOVIN	sp|P00428|COX5B_BOVIN	8	8	8	>sp|P00428|COX5B_BOVIN Cytochrome c oxidase subunit 5B, mitochondrial OS=Bos taurus OX=9913 GN=COX5B PE=1 SV=2	1	8	8	8	7	7	7	7	7	7	8	8	8	8	2	2	7	7	7	8	7	7	7	7	7	7	8	8	8	8	2	2	7	7	7	8	7	7	7	7	7	7	8	8
sp|P00429|CX6B1_BOVIN;sp|Q6YFP9|CX6B2_BOVIN	sp|P00429|CX6B1_BOVIN	11;1	11;1	11;1	>sp|P00429|CX6B1_BOVIN Cytochrome c oxidase subunit 6B1 OS=Bos taurus OX=9913 GN=COX6B1 PE=1 SV=2	2	11	11	11	11	11	11	10	11	11	10	10	11	11	6	8	11	11	10	10	11	11	11	10	11	11	10	10	11	11	6	8	11	11	10	10	11	11	11	10	11	11	10	10
sp|P00432|CATA_BOVIN	sp|P00432|CATA_BOVIN	21	21	21	>sp|P00432|CATA_BOVIN Catalase OS=Bos taurus OX=9913 GN=CAT PE=1 SV=3	1	21	21	21	17	15	14	14	15	16	16	16	17	15	18	19	17	18	18	17	17	15	14	14	15	16	16	16	17	15	18	19	17	18	18	17	17	15	14	14	15	16	16	16
sp|P00435|GPX1_BOVIN	sp|P00435|GPX1_BOVIN	4	4	4	>sp|P00435|GPX1_BOVIN Glutathione peroxidase 1 OS=Bos taurus OX=9913 GN=GPX1 PE=1 SV=3	1	4	4	4	2	3	2	2	1	1	2	1	2	2	2	2	2	2	3	2	2	3	2	2	1	1	2	1	2	2	2	2	2	2	3	2	2	3	2	2	1	1	2	1
sp|P00442|SODC_BOVIN	sp|P00442|SODC_BOVIN	12	12	12	>sp|P00442|SODC_BOVIN Superoxide dismutase [Cu-Zn] OS=Bos taurus OX=9913 GN=SOD1 PE=1 SV=2	1	12	12	12	11	11	10	11	11	9	11	11	11	11	11	11	10	10	10	11	11	11	10	11	11	9	11	11	11	11	11	11	10	10	10	11	11	11	10	11	11	9	11	11
sp|P00514|KAP0_BOVIN	sp|P00514|KAP0_BOVIN	5	5	5	>sp|P00514|KAP0_BOVIN cAMP-dependent protein kinase type I-alpha regulatory subunit OS=Bos taurus OX=9913 GN=PRKAR1A PE=1 SV=2	1	5	5	5	3	3	2	3	5	4	3	4	5	4	2	2	3	4	3	2	3	3	2	3	5	4	3	4	5	4	2	2	3	4	3	2	3	3	2	3	5	4	3	4
sp|P00515|KAP2_BOVIN	sp|P00515|KAP2_BOVIN	11	8	8	>sp|P00515|KAP2_BOVIN cAMP-dependent protein kinase type II-alpha regulatory subunit OS=Bos taurus OX=9913 GN=PRKAR2A PE=1 SV=2	1	11	8	8	11	10	8	10	10	10	11	10	11	10	10	8	9	10	10	9	8	7	6	8	7	8	8	8	8	8	7	6	7	7	8	6	8	7	6	8	7	8	8	8
sp|P00570|KAD1_BOVIN	sp|P00570|KAD1_BOVIN	20	20	19	>sp|P00570|KAD1_BOVIN Adenylate kinase isoenzyme 1 OS=Bos taurus OX=9913 GN=AK1 PE=1 SV=2	1	20	20	19	14	16	16	18	16	14	17	16	17	18	10	10	16	13	14	15	14	16	16	18	16	14	17	16	17	18	10	10	16	13	14	15	13	15	15	17	15	13	16	15
sp|P00727|AMPL_BOVIN	sp|P00727|AMPL_BOVIN	24	24	24	>sp|P00727|AMPL_BOVIN Cytosol aminopeptidase OS=Bos taurus OX=9913 GN=LAP3 PE=1 SV=3	1	24	24	24	19	18	20	21	21	19	20	19	21	21	15	16	20	18	17	19	19	18	20	21	21	19	20	19	21	21	15	16	20	18	17	19	19	18	20	21	21	19	20	19
sp|P00829|ATPB_BOVIN	sp|P00829|ATPB_BOVIN	32	32	32	>sp|P00829|ATPB_BOVIN ATP synthase subunit beta, mitochondrial OS=Bos taurus OX=9913 GN=ATP5F1B PE=1 SV=2	1	32	32	32	32	32	30	30	30	30	30	30	31	30	30	29	30	31	31	31	32	32	30	30	30	30	30	30	31	30	30	29	30	31	31	31	32	32	30	30	30	30	30	30
sp|P00921|CAH2_BOVIN	sp|P00921|CAH2_BOVIN	19	19	19	>sp|P00921|CAH2_BOVIN Carbonic anhydrase 2 OS=Bos taurus OX=9913 GN=CA2 PE=1 SV=3	1	19	19	19	12	13	8	8	8	7	13	12	9	7	17	17	14	15	12	13	12	13	8	8	8	7	13	12	9	7	17	17	14	15	12	13	12	13	8	8	8	7	13	12
sp|P01017|ANGT_BOVIN;CON__Q3SZH5	sp|P01017|ANGT_BOVIN;CON__Q3SZH5	5;4	5;4	5;4	>sp|P01017|ANGT_BOVIN Angiotensinogen OS=Bos taurus OX=9913 GN=AGT PE=1 SV=2;>Q3SZH5 TREMBL:Q3SZH5 (Bos taurus) Similar to Angiotensinogen	2	5	5	5	1	1	4	4	3	3	2	2	3	3	2	2	3	4	3	3	1	1	4	4	3	3	2	2	3	3	2	2	3	4	3	3	1	1	4	4	3	3	2	2
sp|P01096|ATIF1_BOVIN	sp|P01096|ATIF1_BOVIN	6	6	6	>sp|P01096|ATIF1_BOVIN ATPase inhibitor, mitochondrial OS=Bos taurus OX=9913 GN=ATP5IF1 PE=1 SV=2	1	6	6	6	5	4	4	5	6	5	5	5	4	5	3	4	5	5	4	5	5	4	4	5	6	5	5	5	4	5	3	4	5	5	4	5	5	4	4	5	6	5	5	5
sp|P01252|PTMA_BOVIN	sp|P01252|PTMA_BOVIN	4	4	4	>sp|P01252|PTMA_BOVIN Prothymosin alpha OS=Bos taurus OX=9913 GN=PTMA PE=1 SV=2	1	4	4	4	4	4	4	4	4	3	4	3	3	4	2	2	4	4	4	4	4	4	4	4	4	3	4	3	3	4	2	2	4	4	4	4	4	4	4	4	4	3	4	3
sp|P02253|H12_BOVIN;sp|A7MAZ5|H13_BOVIN;sp|G3N131|H11_BOVIN	sp|P02253|H12_BOVIN;sp|A7MAZ5|H13_BOVIN;sp|G3N131|H11_BOVIN	16;14;10	16;14;10	16;14;10	>sp|P02253|H12_BOVIN Histone H1.2 OS=Bos taurus OX=9913 GN=H1-2 PE=1 SV=2;>sp|A7MAZ5|H13_BOVIN Histone H1.3 OS=Bos taurus OX=9913 GN=H1-3 PE=1 SV=1;>sp|G3N131|H11_BOVIN Histone H1.1 OS=Bos taurus OX=9913 GN=H1-1 PE=1 SV=1	3	16	16	16	13	13	14	15	14	14	14	14	16	15	15	14	13	13	14	14	13	13	14	15	14	14	14	14	16	15	15	14	13	13	14	14	13	13	14	15	14	14	14	14
sp|P02453|CO1A1_BOVIN	sp|P02453|CO1A1_BOVIN	6	6	6	>sp|P02453|CO1A1_BOVIN Collagen alpha-1(I) chain OS=Bos taurus OX=9913 GN=COL1A1 PE=1 SV=3	1	6	6	6	2	4	1	1	1	1	3	3	1	1	6	6	2	2	4	4	2	4	1	1	1	1	3	3	1	1	6	6	2	2	4	4	2	4	1	1	1	1	3	3
sp|P02465|CO1A2_BOVIN	sp|P02465|CO1A2_BOVIN	11	11	11	>sp|P02465|CO1A2_BOVIN Collagen alpha-2(I) chain OS=Bos taurus OX=9913 GN=COL1A2 PE=1 SV=2	1	11	11	11	3	3	0	1	0	0	5	3	1	1	10	11	3	3	4	3	3	3	0	1	0	0	5	3	1	1	10	11	3	3	4	3	3	3	0	1	0	0	5	3
sp|P02510|CRYAB_BOVIN	sp|P02510|CRYAB_BOVIN	21	21	21	>sp|P02510|CRYAB_BOVIN Alpha-crystallin B chain OS=Bos taurus OX=9913 GN=CRYAB PE=1 SV=2	1	21	21	21	20	20	21	21	20	20	19	16	20	19	10	13	19	20	18	15	20	20	21	21	20	20	19	16	20	19	10	13	19	20	18	15	20	20	21	21	20	20	19	16
sp|P02548|NFL_BOVIN	sp|P02548|NFL_BOVIN	57	52	52	>sp|P02548|NFL_BOVIN Neurofilament light polypeptide OS=Bos taurus OX=9913 GN=NEFL PE=1 SV=3	1	57	52	52	52	52	53	55	54	55	47	47	45	47	33	31	40	40	38	37	47	47	48	50	49	50	42	42	40	42	29	27	35	35	33	32	47	47	48	50	49	50	42	42
sp|P02638|S100B_BOVIN	sp|P02638|S100B_BOVIN	6	6	6	>sp|P02638|S100B_BOVIN Protein S100-B OS=Bos taurus OX=9913 GN=S100B PE=1 SV=2	1	6	6	6	6	6	5	4	4	5	5	6	6	5	5	6	5	6	6	6	6	6	5	4	4	5	5	6	6	5	5	6	5	6	6	6	6	6	5	4	4	5	5	6
sp|P02639|S10A1_BOVIN	sp|P02639|S10A1_BOVIN	9	9	9	>sp|P02639|S10A1_BOVIN Protein S100-A1 OS=Bos taurus OX=9913 GN=S100A1 PE=1 SV=2	1	9	9	9	9	8	9	9	9	9	9	9	9	9	7	8	9	9	7	8	9	8	9	9	9	9	9	9	9	9	7	8	9	9	7	8	9	8	9	9	9	9	9	9
sp|P02687|MBP_BOVIN	sp|P02687|MBP_BOVIN	30	30	30	>sp|P02687|MBP_BOVIN Myelin basic protein OS=Bos taurus OX=9913 GN=MBP PE=1 SV=1	1	30	30	30	24	25	30	30	28	26	24	24	25	25	20	20	23	22	20	20	24	25	30	30	28	26	24	24	25	25	20	20	23	22	20	20	24	25	30	30	28	26	24	24
sp|P02722|ADT1_BOVIN	sp|P02722|ADT1_BOVIN	24	24	12	>sp|P02722|ADT1_BOVIN ADP/ATP translocase 1 OS=Bos taurus OX=9913 GN=SLC25A4 PE=1 SV=3	1	24	24	12	22	23	21	19	20	20	23	21	22	22	12	13	21	21	23	23	22	23	21	19	20	20	23	21	22	22	12	13	21	21	23	23	10	11	9	9	9	9	11	9
sp|P03968|FGF1_BOVIN	sp|P03968|FGF1_BOVIN	6	6	6	>sp|P03968|FGF1_BOVIN Fibroblast growth factor 1 OS=Bos taurus OX=9913 GN=FGF1 PE=1 SV=2	1	6	6	6	5	5	6	6	6	6	5	6	5	6	3	4	5	5	5	4	5	5	6	6	6	6	5	6	5	6	3	4	5	5	5	4	5	5	6	6	6	6	5	6
sp|P04038|COX6C_BOVIN	sp|P04038|COX6C_BOVIN	5	5	5	>sp|P04038|COX6C_BOVIN Cytochrome c oxidase subunit 6C OS=Bos taurus OX=9913 GN=COX6C PE=1 SV=2	1	5	5	5	5	5	5	5	5	5	5	5	5	5	4	5	5	5	5	5	5	5	5	5	5	5	5	5	5	5	4	5	5	5	5	5	5	5	5	5	5	5	5	5
sp|P04116|MYPR_BOVIN	sp|P04116|MYPR_BOVIN	15	15	15	>sp|P04116|MYPR_BOVIN Myelin proteolipid protein OS=Bos taurus OX=9913 GN=PLP1 PE=1 SV=3	1	15	15	15	12	14	15	15	15	15	12	13	14	15	11	10	13	12	11	12	12	14	15	15	15	15	12	13	14	15	11	10	13	12	11	12	12	14	15	15	15	15	12	13
sp|P04272|ANXA2_BOVIN	sp|P04272|ANXA2_BOVIN	23	23	23	>sp|P04272|ANXA2_BOVIN Annexin A2 OS=Bos taurus OX=9913 GN=ANXA2 PE=1 SV=2	1	23	23	23	11	12	7	9	9	11	13	10	13	11	22	20	11	9	21	23	11	12	7	9	9	11	13	10	13	11	22	20	11	9	21	23	11	12	7	9	9	11	13	10
sp|P04394|NDUV2_BOVIN	sp|P04394|NDUV2_BOVIN	8	8	8	>sp|P04394|NDUV2_BOVIN NADH dehydrogenase [ubiquinone] flavoprotein 2, mitochondrial OS=Bos taurus OX=9913 GN=NDUFV2 PE=1 SV=3	1	8	8	8	5	5	8	7	7	7	6	6	7	7	3	5	6	6	6	6	5	5	8	7	7	7	6	6	7	7	3	5	6	6	6	6	5	5	8	7	7	7	6	6
sp|P04409|KPCA_BOVIN	sp|P04409|KPCA_BOVIN	23	21	11	>sp|P04409|KPCA_BOVIN Protein kinase C alpha type OS=Bos taurus OX=9913 GN=PRKCA PE=1 SV=3	1	23	21	11	15	15	18	18	17	18	16	16	20	18	8	8	15	15	12	15	13	14	17	16	15	16	14	14	18	16	7	7	13	13	10	13	6	7	8	8	7	8	6	6
sp|P04896|GNAS2_BOVIN	sp|P04896|GNAS2_BOVIN	13	12	12	>sp|P04896|GNAS2_BOVIN Guanine nucleotide-binding protein G(s) subunit alpha isoforms short OS=Bos taurus OX=9913 GN=GNAS PE=1 SV=1	1	13	12	12	10	10	12	10	12	11	10	8	11	12	5	6	9	10	9	11	9	9	11	9	11	10	9	7	10	11	5	5	8	9	8	10	9	9	11	9	11	10	9	7
sp|P04973|CLCA_BOVIN	sp|P04973|CLCA_BOVIN	9	9	9	>sp|P04973|CLCA_BOVIN Clathrin light chain A OS=Bos taurus OX=9913 GN=CLTA PE=1 SV=1	1	9	9	9	9	9	8	8	8	9	9	9	9	9	3	5	7	8	7	8	9	9	8	8	8	9	9	9	9	9	3	5	7	8	7	8	9	9	8	8	8	9	9	9
sp|P04975|CLCB_BOVIN	sp|P04975|CLCB_BOVIN	14	14	14	>sp|P04975|CLCB_BOVIN Clathrin light chain B OS=Bos taurus OX=9913 GN=CLTB PE=1 SV=1	1	14	14	14	13	13	11	13	14	14	14	14	12	14	9	11	14	14	12	11	13	13	11	13	14	14	14	14	12	14	9	11	14	14	12	11	13	13	11	13	14	14	14	14
sp|P05126|KPCB_BOVIN	sp|P05126|KPCB_BOVIN	22	11	11	>sp|P05126|KPCB_BOVIN Protein kinase C beta type OS=Bos taurus OX=9913 GN=PRKCB PE=2 SV=4	1	22	11	11	18	18	20	19	19	20	18	17	20	18	9	8	17	15	13	14	10	10	10	10	10	11	9	8	9	9	4	3	9	8	7	7	10	10	10	10	10	11	9	8
sp|P05128|KPCG_BOVIN	sp|P05128|KPCG_BOVIN	26	26	24	>sp|P05128|KPCG_BOVIN Protein kinase C gamma type (Fragment) OS=Bos taurus OX=9913 GN=PRKCG PE=2 SV=1	1	26	26	24	21	20	25	24	23	25	19	20	25	25	11	9	21	24	21	19	21	20	25	24	23	25	19	20	25	25	11	9	21	24	21	19	19	19	24	22	21	23	17	18
sp|P05131|KAPCB_BOVIN	sp|P05131|KAPCB_BOVIN	16	16	5	>sp|P05131|KAPCB_BOVIN cAMP-dependent protein kinase catalytic subunit beta OS=Bos taurus OX=9913 GN=PRKACB PE=1 SV=2	1	16	16	5	13	14	12	13	14	13	15	13	14	14	5	7	14	15	14	12	13	14	12	13	14	13	15	13	14	14	5	7	14	15	14	12	5	5	5	5	5	5	5	5
sp|P05307|PDIA1_BOVIN	sp|P05307|PDIA1_BOVIN	13	13	13	>sp|P05307|PDIA1_BOVIN Protein disulfide-isomerase OS=Bos taurus OX=9913 GN=P4HB PE=1 SV=1	1	13	13	13	13	13	10	11	13	12	12	12	11	12	13	12	11	11	13	12	13	13	10	11	13	12	12	12	11	12	13	12	11	11	13	12	13	13	10	11	13	12	12	12
sp|P05630|ATPD_BOVIN	sp|P05630|ATPD_BOVIN	4	4	4	>sp|P05630|ATPD_BOVIN ATP synthase subunit delta, mitochondrial OS=Bos taurus OX=9913 GN=ATP5F1D PE=1 SV=2	1	4	4	4	4	3	4	3	4	4	3	3	4	3	3	2	4	4	3	4	4	3	4	3	4	4	3	3	4	3	3	2	4	4	3	4	4	3	4	3	4	4	3	3
sp|P05631|ATPG_BOVIN	sp|P05631|ATPG_BOVIN	16	16	16	>sp|P05631|ATPG_BOVIN ATP synthase subunit gamma, mitochondrial OS=Bos taurus OX=9913 GN=ATP5F1C PE=1 SV=3	1	16	16	16	16	15	15	14	14	14	15	15	15	15	11	11	14	15	15	16	16	15	15	14	14	14	15	15	15	15	11	11	14	15	15	16	16	15	15	14	14	14	15	15
sp|P06623|CN37_BOVIN	sp|P06623|CN37_BOVIN	56	56	56	>sp|P06623|CN37_BOVIN 2,3-cyclic-nucleotide 3-phosphodiesterase OS=Bos taurus OX=9913 GN=CNP PE=2 SV=2	1	56	56	56	54	54	54	54	56	55	52	51	54	54	43	42	48	48	43	44	54	54	54	54	56	55	52	51	54	54	43	42	48	48	43	44	54	54	54	54	56	55	52	51
sp|P06836|NEUM_BOVIN	sp|P06836|NEUM_BOVIN	27	27	27	>sp|P06836|NEUM_BOVIN Neuromodulin OS=Bos taurus OX=9913 GN=GAP43 PE=1 SV=3	1	27	27	27	24	27	20	25	24	22	21	24	27	27	17	18	26	24	26	26	24	27	20	25	24	22	21	24	27	27	17	18	26	24	26	26	24	27	20	25	24	22	21	24
sp|P07107|ACBP_BOVIN	sp|P07107|ACBP_BOVIN	13	13	13	>sp|P07107|ACBP_BOVIN Acyl-CoA-binding protein OS=Bos taurus OX=9913 GN=DBI PE=1 SV=2	1	13	13	13	12	12	11	12	12	12	12	12	13	12	10	9	12	12	12	12	12	12	11	12	12	12	12	12	13	12	10	9	12	12	12	12	12	12	11	12	12	12	12	12
sp|P07514|NB5R3_BOVIN	sp|P07514|NB5R3_BOVIN	13	13	13	>sp|P07514|NB5R3_BOVIN NADH-cytochrome b5 reductase 3 OS=Bos taurus OX=9913 GN=CYB5R3 PE=1 SV=3	1	13	13	13	9	11	9	10	10	6	9	10	11	13	9	8	11	12	13	13	9	11	9	10	10	6	9	10	11	13	9	8	11	12	13	13	9	11	9	10	10	6	9	10
sp|P07589|FINC_BOVIN	sp|P07589|FINC_BOVIN	21	21	21	>sp|P07589|FINC_BOVIN Fibronectin OS=Bos taurus OX=9913 GN=FN1 PE=1 SV=4	1	21	21	21	11	14	0	0	0	0	1	2	3	2	21	21	3	3	7	7	11	14	0	0	0	0	1	2	3	2	21	21	3	3	7	7	11	14	0	0	0	0	1	2
sp|P07857|SCP2_BOVIN	sp|P07857|SCP2_BOVIN	5	5	5	>sp|P07857|SCP2_BOVIN Sterol carrier protein 2 OS=Bos taurus OX=9913 GN=SCP2 PE=1 SV=2	1	5	5	5	5	4	5	5	5	5	5	4	5	5	3	3	5	5	5	5	5	4	5	5	5	5	5	4	5	5	3	3	5	5	5	5	5	4	5	5	5	5	5	4
sp|P08220|GBRB1_BOVIN;sp|P0C2W5|GBRB2_BOVIN	sp|P08220|GBRB1_BOVIN;sp|P0C2W5|GBRB2_BOVIN	4;3	4;3	4;3	>sp|P08220|GBRB1_BOVIN Gamma-aminobutyric acid receptor subunit beta-1 OS=Bos taurus OX=9913 GN=GABRB1 PE=1 SV=1;>sp|P0C2W5|GBRB2_BOVIN Gamma-aminobutyric acid receptor subunit beta-2 (Fragment) OS=Bos taurus OX=9913 GN=GABRB2 PE=1 SV=1	2	4	4	4	3	3	2	2	3	4	4	4	4	4	0	0	2	2	3	3	3	3	2	2	3	4	4	4	4	4	0	0	2	2	3	3	3	3	2	2	3	4	4	4
sp|P08239|GNAO_BOVIN	sp|P08239|GNAO_BOVIN	28	28	25	>sp|P08239|GNAO_BOVIN Guanine nucleotide-binding protein G(o) subunit alpha OS=Bos taurus OX=9913 GN=GNAO1 PE=1 SV=4	1	28	28	25	26	26	22	21	26	24	24	25	25	28	17	19	25	24	27	24	26	26	22	21	26	24	24	25	25	28	17	19	25	24	27	24	23	23	19	18	23	21	21	22
sp|P09867|ROA1_BOVIN	sp|P09867|ROA1_BOVIN	11	11	11	>sp|P09867|ROA1_BOVIN Heterogeneous nuclear ribonucleoprotein A1 OS=Bos taurus OX=9913 GN=HNRNPA1 PE=1 SV=2	1	11	11	11	8	8	9	9	11	9	11	11	10	10	10	9	10	10	10	10	8	8	9	9	11	9	11	11	10	10	10	9	10	10	10	10	8	8	9	9	11	9	11	11
sp|P0CH28|UBC_BOVIN;sp|P63048|RL40_BOVIN;sp|P62992|RS27A_BOVIN;sp|P0CG53|UBB_BOVIN	sp|P0CH28|UBC_BOVIN;sp|P63048|RL40_BOVIN;sp|P62992|RS27A_BOVIN;sp|P0CG53|UBB_BOVIN	11;10;10;10	11;10;10;10	11;10;10;10	>sp|P0CH28|UBC_BOVIN Polyubiquitin-C OS=Bos taurus OX=9913 GN=UBC PE=1 SV=1;>sp|P63048|RL40_BOVIN Ubiquitin-60S ribosomal protein L40 OS=Bos taurus OX=9913 GN=UBA52 PE=1 SV=2;>sp|P62992|RS27A_BOVIN Ubiquitin-40S ribosomal protein S27a OS=Bos taurus OX=9913	4	11	11	11	9	11	11	10	10	10	10	10	9	9	10	9	10	10	11	11	9	11	11	10	10	10	10	10	9	9	10	9	10	10	11	11	9	11	11	10	10	10	10	10
sp|P10096|G3P_BOVIN	sp|P10096|G3P_BOVIN	36	36	34	>sp|P10096|G3P_BOVIN Glyceraldehyde-3-phosphate dehydrogenase OS=Bos taurus OX=9913 GN=GAPDH PE=1 SV=4	1	36	36	34	33	35	30	32	31	30	33	33	33	32	26	27	31	29	31	33	33	35	30	32	31	30	33	33	33	32	26	27	31	29	31	33	31	33	28	30	29	28	32	31
sp|P10103|HMGB1_BOVIN	sp|P10103|HMGB1_BOVIN	10	10	9	>sp|P10103|HMGB1_BOVIN High mobility group protein B1 OS=Bos taurus OX=9913 GN=HMGB1 PE=1 SV=3	1	10	10	9	8	7	8	8	8	8	8	8	9	9	6	7	7	7	8	8	8	7	8	8	8	8	8	8	9	9	6	7	7	7	8	8	7	7	8	8	8	8	8	8
sp|P10123|RLBP1_BOVIN	sp|P10123|RLBP1_BOVIN	4	4	4	>sp|P10123|RLBP1_BOVIN Retinaldehyde-binding protein 1 OS=Bos taurus OX=9913 GN=RLBP1 PE=1 SV=4	1	4	4	4	2	4	1	1	0	2	4	2	3	2	1	2	4	4	4	4	2	4	1	1	0	2	4	2	3	2	1	2	4	4	4	4	2	4	1	1	0	2	4	2
sp|P10279|PRIO_BOVIN	sp|P10279|PRIO_BOVIN	7	7	7	>sp|P10279|PRIO_BOVIN Major prion protein OS=Bos taurus OX=9913 GN=PRNP PE=1 SV=2	1	7	7	7	5	4	5	6	6	5	6	4	6	6	2	4	5	5	5	4	5	4	5	6	6	5	6	4	6	6	2	4	5	5	5	4	5	4	5	6	6	5	6	4
sp|P10790|FABPH_BOVIN;sp|P48035|FABP4_BOVIN	sp|P10790|FABPH_BOVIN	8;1	8;1	7;0	>sp|P10790|FABPH_BOVIN Fatty acid-binding protein, heart OS=Bos taurus OX=9913 GN=FABP3 PE=1 SV=2	2	8	8	7	8	8	8	8	8	8	8	8	8	8	4	5	8	8	7	8	8	8	8	8	8	8	8	8	8	8	4	5	8	8	7	8	7	7	7	7	7	7	7	7
sp|P10894|PLCB1_BOVIN	sp|P10894|PLCB1_BOVIN	28	28	28	>sp|P10894|PLCB1_BOVIN 1-phosphatidylinositol 4,5-bisphosphate phosphodiesterase beta-1 OS=Bos taurus OX=9913 GN=PLCB1 PE=1 SV=1	1	28	28	28	22	24	20	21	25	25	24	24	24	22	10	8	22	25	24	21	22	24	20	21	25	25	24	24	24	22	10	8	22	25	24	21	22	24	20	21	25	25	24	24
sp|P10948|RAB3B_BOVIN	sp|P10948|RAB3B_BOVIN	6	4	4	>sp|P10948|RAB3B_BOVIN Ras-related protein Rab-3B OS=Bos taurus OX=9913 GN=RAB3B PE=2 SV=1	1	6	4	4	2	4	3	5	5	5	5	5	6	6	2	2	6	6	5	5	1	2	1	3	3	3	3	3	4	4	1	1	4	4	3	3	1	2	1	3	3	3	3	3
sp|P10949|RAB3C_BOVIN	sp|P10949|RAB3C_BOVIN	7	5	4	>sp|P10949|RAB3C_BOVIN Ras-related protein Rab-3C OS=Bos taurus OX=9913 GN=RAB3C PE=2 SV=3	1	7	5	4	5	6	6	5	5	6	7	7	7	7	5	5	6	6	6	7	3	4	4	3	4	4	5	5	5	5	3	3	4	5	4	5	3	3	3	2	3	3	4	4
sp|P11017|GBB2_BOVIN	sp|P11017|GBB2_BOVIN	17	17	11	>sp|P11017|GBB2_BOVIN Guanine nucleotide-binding protein G(I)/G(S)/G(T) subunit beta-2 OS=Bos taurus OX=9913 GN=GNB2 PE=2 SV=3	1	17	17	11	14	15	17	15	16	16	15	13	17	16	12	11	16	15	15	15	14	15	17	15	16	16	15	13	17	16	12	11	16	15	15	15	9	10	11	10	10	10	9	8
sp|P11019|VATE1_BOVIN;sp|Q32LB7|VATE2_BOVIN	sp|P11019|VATE1_BOVIN	14;4	14;4	14;4	>sp|P11019|VATE1_BOVIN V-type proton ATPase subunit E 1 OS=Bos taurus OX=9913 GN=ATP6V1E1 PE=1 SV=1	2	14	14	14	11	13	12	12	14	14	13	13	13	13	7	8	13	12	12	11	11	13	12	12	14	14	13	13	13	13	7	8	13	12	12	11	11	13	12	12	14	14	13	13
sp|P11023|RAB3A_BOVIN;sp|Q17QU4|RB39B_BOVIN	sp|P11023|RAB3A_BOVIN	14;1	14;1	12;0	>sp|P11023|RAB3A_BOVIN Ras-related protein Rab-3A OS=Bos taurus OX=9913 GN=RAB3A PE=1 SV=3	2	14	14	12	14	14	13	12	12	13	14	14	14	14	9	8	14	12	13	13	14	14	13	12	12	13	14	14	14	14	9	8	14	12	13	13	12	12	11	10	11	11	12	12
sp|P11024|NNTM_BOVIN	sp|P11024|NNTM_BOVIN	23	23	23	>sp|P11024|NNTM_BOVIN NAD(P) transhydrogenase, mitochondrial OS=Bos taurus OX=9913 GN=NNT PE=1 SV=3	1	23	23	23	20	21	19	18	17	17	21	22	21	18	13	10	20	18	18	19	20	21	19	18	17	17	21	22	21	18	13	10	20	18	18	19	20	21	19	18	17	17	21	22
sp|P11064|PPAC_BOVIN	sp|P11064|PPAC_BOVIN	5	5	5	>sp|P11064|PPAC_BOVIN Low molecular weight phosphotyrosine protein phosphatase OS=Bos taurus OX=9913 GN=ACP1 PE=1 SV=3	1	5	5	5	2	4	4	5	4	4	3	5	4	4	2	2	3	4	4	4	2	4	4	5	4	4	3	5	4	4	2	2	3	4	4	4	2	4	4	5	4	4	3	5
sp|P11116|LEG1_BOVIN	sp|P11116|LEG1_BOVIN	8	8	8	>sp|P11116|LEG1_BOVIN Galectin-1 OS=Bos taurus OX=9913 GN=LGALS1 PE=1 SV=2	1	8	8	8	7	7	7	7	7	7	7	7	7	7	8	8	7	7	8	7	7	7	7	7	7	7	7	7	7	7	8	8	7	7	8	7	7	7	7	7	7	7	7	7
sp|P11179|ODO2_BOVIN	sp|P11179|ODO2_BOVIN	13	13	13	>sp|P11179|ODO2_BOVIN Dihydrolipoyllysine-residue succinyltransferase component of 2-oxoglutarate dehydrogenase complex, mitochondrial OS=Bos taurus OX=9913 GN=DLST PE=1 SV=2	1	13	13	13	12	12	13	13	13	13	13	13	13	13	8	8	13	11	10	11	12	12	13	13	13	13	13	13	13	13	8	8	13	11	10	11	12	12	13	13	13	13	13	13
sp|P11181|ODB2_BOVIN	sp|P11181|ODB2_BOVIN	5	5	5	>sp|P11181|ODB2_BOVIN Lipoamide acyltransferase component of branched-chain alpha-keto acid dehydrogenase complex, mitochondrial OS=Bos taurus OX=9913 GN=DBT PE=1 SV=2	1	5	5	5	2	4	3	4	5	5	5	5	4	3	2	1	3	3	5	4	2	4	3	4	5	5	5	5	4	3	2	1	3	3	5	4	2	4	3	4	5	5	5	5
sp|P11834|OPCM_BOVIN	sp|P11834|OPCM_BOVIN	15	15	11	>sp|P11834|OPCM_BOVIN Opioid-binding protein/cell adhesion molecule OS=Bos taurus OX=9913 GN=OPCML PE=1 SV=1	1	15	15	11	13	15	15	12	13	12	14	13	15	15	7	8	14	15	12	14	13	15	15	12	13	12	14	13	15	15	7	8	14	15	12	14	9	11	11	10	10	10	11	10
sp|P11966|ODPB_BOVIN	sp|P11966|ODPB_BOVIN	20	20	20	>sp|P11966|ODPB_BOVIN Pyruvate dehydrogenase E1 component subunit beta, mitochondrial OS=Bos taurus OX=9913 GN=PDHB PE=1 SV=2	1	20	20	20	17	16	16	17	17	16	18	16	20	18	10	10	16	17	13	14	17	16	16	17	17	16	18	16	20	18	10	10	16	17	13	14	17	16	16	17	17	16	18	16
sp|P12234|MPCP_BOVIN	sp|P12234|MPCP_BOVIN	19	19	19	>sp|P12234|MPCP_BOVIN Phosphate carrier protein, mitochondrial OS=Bos taurus OX=9913 GN=SLC25A3 PE=1 SV=1	1	19	19	19	18	18	13	15	15	17	18	18	17	17	11	13	17	16	16	18	18	18	13	15	15	17	18	18	17	17	11	13	17	16	16	18	18	18	13	15	15	17	18	18
sp|P12344|AATM_BOVIN	sp|P12344|AATM_BOVIN	34	34	34	>sp|P12344|AATM_BOVIN Aspartate aminotransferase, mitochondrial OS=Bos taurus OX=9913 GN=GOT2 PE=1 SV=2	1	34	34	34	32	32	30	32	32	33	33	33	33	34	24	24	33	30	30	31	32	32	30	32	32	33	33	33	33	34	24	24	33	30	30	31	32	32	30	32	32	33	33	33
sp|P12624|MARCS_BOVIN	sp|P12624|MARCS_BOVIN	8	8	8	>sp|P12624|MARCS_BOVIN Myristoylated alanine-rich C-kinase substrate OS=Bos taurus OX=9913 GN=MARCKS PE=1 SV=6	1	8	8	8	7	7	7	7	7	8	7	7	7	7	6	6	7	8	8	8	7	7	7	7	7	8	7	7	7	7	6	6	7	8	8	8	7	7	7	7	7	8	7	7
sp|P12799|FIBG_BOVIN	sp|P12799|FIBG_BOVIN	21	21	21	>sp|P12799|FIBG_BOVIN Fibrinogen gamma-B chain OS=Bos taurus OX=9913 GN=FGG PE=1 SV=1	1	21	21	21	19	19	8	10	9	9	16	15	17	15	19	19	19	19	18	19	19	19	8	10	9	9	16	15	17	15	19	19	19	19	18	19	19	19	8	10	9	9	16	15
sp|P13135|CPNS1_BOVIN	sp|P13135|CPNS1_BOVIN	6	6	6	>sp|P13135|CPNS1_BOVIN Calpain small subunit 1 OS=Bos taurus OX=9913 GN=CAPNS1 PE=2 SV=1	1	6	6	6	5	5	5	5	4	4	5	4	5	6	5	5	6	5	5	6	5	5	5	5	4	4	5	4	5	6	5	5	6	5	5	6	5	5	5	5	4	4	5	4
sp|P13214|ANXA4_BOVIN	sp|P13214|ANXA4_BOVIN	5	5	5	>sp|P13214|ANXA4_BOVIN Annexin A4 OS=Bos taurus OX=9913 GN=ANXA4 PE=1 SV=2	1	5	5	5	3	2	3	4	1	2	2	2	1	3	3	3	1	2	5	5	3	2	3	4	1	2	2	2	1	3	3	3	1	2	5	5	3	2	3	4	1	2	2	2
sp|P13271|QCR8_BOVIN	sp|P13271|QCR8_BOVIN	7	7	7	>sp|P13271|QCR8_BOVIN Cytochrome b-c1 complex subunit 8 OS=Bos taurus OX=9913 GN=UQCRQ PE=1 SV=3	1	7	7	7	6	6	5	5	5	4	7	7	6	6	4	2	6	6	7	6	6	6	5	5	5	4	7	7	6	6	4	2	6	6	7	6	6	6	5	5	5	4	7	7
sp|P13272|UCRI_BOVIN	sp|P13272|UCRI_BOVIN	7	7	7	>sp|P13272|UCRI_BOVIN Cytochrome b-c1 complex subunit Rieske, mitochondrial OS=Bos taurus OX=9913 GN=UQCRFS1 PE=1 SV=3	1	7	7	7	7	7	6	7	7	7	7	7	7	7	4	5	7	7	5	7	7	7	6	7	7	7	7	7	7	7	4	5	7	7	5	7	7	7	6	7	7	7	7	7
sp|P13605|FMOD_BOVIN	sp|P13605|FMOD_BOVIN	6	6	6	>sp|P13605|FMOD_BOVIN Fibromodulin OS=Bos taurus OX=9913 GN=FMOD PE=1 SV=2	1	6	6	6	2	4	0	0	0	0	2	2	1	3	6	6	2	2	5	5	2	4	0	0	0	0	2	2	1	3	6	6	2	2	5	5	2	4	0	0	0	0	2	2
sp|P13619|AT5F1_BOVIN	sp|P13619|AT5F1_BOVIN	14	14	14	>sp|P13619|AT5F1_BOVIN ATP synthase F(0) complex subunit B1, mitochondrial OS=Bos taurus OX=9913 GN=ATP5PB PE=1 SV=2	1	14	14	14	14	14	14	14	14	14	14	14	14	14	12	12	12	14	13	14	14	14	14	14	14	14	14	14	14	14	12	12	12	14	13	14	14	14	14	14	14	14	14	14
sp|P13620|ATP5H_BOVIN	sp|P13620|ATP5H_BOVIN	15	15	15	>sp|P13620|ATP5H_BOVIN ATP synthase subunit d, mitochondrial OS=Bos taurus OX=9913 GN=ATP5PD PE=1 SV=2	1	15	15	15	12	12	14	14	13	13	13	13	13	13	8	8	13	13	12	11	12	12	14	14	13	13	13	13	13	13	8	8	13	13	12	11	12	12	14	14	13	13	13	13
sp|P13621|ATPO_BOVIN	sp|P13621|ATPO_BOVIN	13	13	13	>sp|P13621|ATPO_BOVIN ATP synthase subunit O, mitochondrial OS=Bos taurus OX=9913 GN=ATP5PO PE=1 SV=2	1	13	13	13	12	12	12	12	12	11	12	12	12	12	11	11	11	13	13	12	12	12	12	12	12	11	12	12	12	12	11	11	11	13	13	12	12	12	12	12	12	11	12	12
sp|P13696|PEBP1_BOVIN	sp|P13696|PEBP1_BOVIN	24	24	24	>sp|P13696|PEBP1_BOVIN Phosphatidylethanolamine-binding protein 1 OS=Bos taurus OX=9913 GN=PEBP1 PE=1 SV=2	1	24	24	24	23	23	22	23	22	23	23	23	23	23	18	17	22	22	21	23	23	23	22	23	22	23	23	23	23	23	18	17	22	22	21	23	23	23	22	23	22	23	23	23
sp|P15103|GLNA_BOVIN	sp|P15103|GLNA_BOVIN	28	28	28	>sp|P15103|GLNA_BOVIN Glutamine synthetase OS=Bos taurus OX=9913 GN=GLUL PE=2 SV=4	1	28	28	28	28	27	28	26	27	27	26	27	28	28	18	17	25	28	25	24	28	27	28	26	27	27	26	27	28	28	18	17	25	28	25	24	28	27	28	26	27	27	26	27
sp|P15246|PIMT_BOVIN	sp|P15246|PIMT_BOVIN	16	16	16	>sp|P15246|PIMT_BOVIN Protein-L-isoaspartate(D-aspartate) O-methyltransferase OS=Bos taurus OX=9913 GN=PCMT1 PE=1 SV=2	1	16	16	16	14	14	15	15	15	15	14	15	15	15	12	11	14	14	13	14	14	14	15	15	15	15	14	15	15	15	12	11	14	14	13	14	14	14	15	15	15	15	14	15
sp|P15690|NDUS1_BOVIN	sp|P15690|NDUS1_BOVIN	36	36	36	>sp|P15690|NDUS1_BOVIN NADH-ubiquinone oxidoreductase 75 kDa subunit, mitochondrial OS=Bos taurus OX=9913 GN=NDUFS1 PE=1 SV=1	1	36	36	36	32	32	28	30	28	29	30	27	35	33	19	14	27	27	31	25	32	32	28	30	28	29	30	27	35	33	19	14	27	27	31	25	32	32	28	30	28	29	30	27
sp|P16116|ALDR_BOVIN;sp|P52898|DDBX_BOVIN;sp|P52897|PGFS2_BOVIN;sp|P05980|PGFS1_BOVIN	sp|P16116|ALDR_BOVIN	12;1;1;1	12;1;1;1	12;1;1;1	>sp|P16116|ALDR_BOVIN Aldo-keto reductase family 1 member B1 OS=Bos taurus OX=9913 GN=AKR1B1 PE=1 SV=2	4	12	12	12	9	8	11	11	11	11	9	7	9	11	7	8	8	9	9	10	9	8	11	11	11	11	9	7	9	11	7	8	8	9	9	10	9	8	11	11	11	11	9	7
sp|P17248|SYWC_BOVIN	sp|P17248|SYWC_BOVIN	18	18	18	>sp|P17248|SYWC_BOVIN Tryptophan--tRNA ligase, cytoplasmic OS=Bos taurus OX=9913 GN=WARS1 PE=1 SV=3	1	18	18	18	14	13	15	17	17	18	14	16	17	17	8	9	13	13	15	14	14	13	15	17	17	18	14	16	17	17	8	9	13	13	15	14	14	13	15	17	17	18	14	16
sp|P17599|SYN1_BOVIN	sp|P17599|SYN1_BOVIN	43	43	43	>sp|P17599|SYN1_BOVIN Synapsin-1 OS=Bos taurus OX=9913 GN=SYN1 PE=1 SV=2	1	43	43	43	37	40	34	35	36	36	39	37	40	39	29	27	37	35	38	38	37	40	34	35	36	36	39	37	40	39	29	27	37	35	38	38	37	40	34	35	36	36	39	37
sp|P17694|NDUS2_BOVIN	sp|P17694|NDUS2_BOVIN	11	11	11	>sp|P17694|NDUS2_BOVIN NADH dehydrogenase [ubiquinone] iron-sulfur protein 2, mitochondrial OS=Bos taurus OX=9913 GN=NDUFS2 PE=1 SV=2	1	11	11	11	9	9	9	10	10	10	10	10	10	10	7	5	9	9	9	9	9	9	9	10	10	10	10	10	10	10	7	5	9	9	9	9	9	9	9	10	10	10	10	10
sp|P17870|ARRB1_BOVIN	sp|P17870|ARRB1_BOVIN	8	8	8	>sp|P17870|ARRB1_BOVIN Beta-arrestin-1 OS=Bos taurus OX=9913 GN=ARRB1 PE=1 SV=1	1	8	8	8	4	6	7	6	7	6	4	6	5	7	4	4	5	4	4	5	4	6	7	6	7	6	4	6	5	7	4	4	5	4	4	5	4	6	7	6	7	6	4	6
sp|P18203|FKB1A_BOVIN	sp|P18203|FKB1A_BOVIN	7	7	7	>sp|P18203|FKB1A_BOVIN Peptidyl-prolyl cis-trans isomerase FKBP1A OS=Bos taurus OX=9913 GN=FKBP1A PE=1 SV=2	1	7	7	7	6	7	5	5	5	5	6	6	7	7	7	7	7	7	7	7	6	7	5	5	5	5	6	6	7	7	7	7	7	7	7	7	6	7	5	5	5	5	6	6
sp|P18246|CXA1_BOVIN	sp|P18246|CXA1_BOVIN	10	10	10	>sp|P18246|CXA1_BOVIN Gap junction alpha-1 protein OS=Bos taurus OX=9913 GN=GJA1 PE=2 SV=2	1	10	10	10	6	6	6	8	10	10	8	7	9	9	6	5	8	10	9	9	6	6	6	8	10	10	8	7	9	9	6	5	8	10	9	9	6	6	6	8	10	10	8	7
sp|P19120|HSP7C_BOVIN	sp|P19120|HSP7C_BOVIN	49	49	36	>sp|P19120|HSP7C_BOVIN Heat shock cognate 71 kDa protein OS=Bos taurus OX=9913 GN=HSPA8 PE=1 SV=2	1	49	49	36	47	47	48	47	46	46	47	46	44	45	42	43	47	48	45	45	47	47	48	47	46	46	47	46	44	45	42	43	47	48	45	45	34	34	35	34	33	33	34	33
sp|P19483|ATPA_BOVIN	sp|P19483|ATPA_BOVIN	53	53	53	>sp|P19483|ATPA_BOVIN ATP synthase subunit alpha, mitochondrial OS=Bos taurus OX=9913 GN=ATP5F1A PE=1 SV=1	1	53	53	53	49	46	45	43	44	44	53	50	52	49	41	36	47	48	45	45	49	46	45	43	44	44	53	50	52	49	41	36	47	48	45	45	49	46	45	43	44	44	53	50
sp|P19534|CADH2_BOVIN	sp|P19534|CADH2_BOVIN	4	4	4	>sp|P19534|CADH2_BOVIN Cadherin-2 OS=Bos taurus OX=9913 GN=CDH2 PE=2 SV=2	1	4	4	4	3	4	3	3	4	3	4	4	4	4	0	1	3	4	3	4	3	4	3	3	4	3	4	4	4	4	0	1	3	4	3	4	3	4	3	3	4	3	4	4
sp|P19803|GDIR1_BOVIN	sp|P19803|GDIR1_BOVIN	12	12	12	>sp|P19803|GDIR1_BOVIN Rho GDP-dissociation inhibitor 1 OS=Bos taurus OX=9913 GN=ARHGDIA PE=1 SV=3	1	12	12	12	9	9	10	10	10	11	9	9	10	10	9	9	10	10	9	10	9	9	10	10	10	11	9	9	10	10	9	9	10	10	9	10	9	9	10	10	10	11	9	9
sp|P19858|LDHA_BOVIN	sp|P19858|LDHA_BOVIN	23	19	19	>sp|P19858|LDHA_BOVIN L-lactate dehydrogenase A chain OS=Bos taurus OX=9913 GN=LDHA PE=2 SV=2	1	23	19	19	17	21	17	17	18	19	15	16	22	22	10	11	19	20	16	13	13	17	13	13	14	15	11	12	18	18	7	8	15	16	12	10	13	17	13	13	14	15	11	12
sp|P19879|MIME_BOVIN	sp|P19879|MIME_BOVIN	11	11	11	>sp|P19879|MIME_BOVIN Mimecan OS=Bos taurus OX=9913 GN=OGN PE=1 SV=2	1	11	11	11	6	6	0	0	0	0	1	3	2	5	11	10	3	1	11	10	6	6	0	0	0	0	1	3	2	5	11	10	3	1	11	10	6	6	0	0	0	0	1	3
sp|P20000|ALDH2_BOVIN;sp|P52476|AL1B1_BOVIN	sp|P20000|ALDH2_BOVIN	20;1	20;1	20;1	>sp|P20000|ALDH2_BOVIN Aldehyde dehydrogenase, mitochondrial OS=Bos taurus OX=9913 GN=ALDH2 PE=1 SV=2	2	20	20	20	17	15	17	15	17	18	19	19	20	20	13	14	14	14	17	16	17	15	17	15	17	18	19	19	20	20	13	14	14	14	17	16	17	15	17	15	17	18	19	19
sp|P20004|ACON_BOVIN	sp|P20004|ACON_BOVIN	51	51	51	>sp|P20004|ACON_BOVIN Aconitate hydratase, mitochondrial OS=Bos taurus OX=9913 GN=ACO2 PE=1 SV=4	1	51	51	51	39	44	44	43	48	46	49	47	46	44	34	34	45	45	43	43	39	44	44	43	48	46	49	47	46	44	34	34	45	45	43	43	39	44	44	43	48	46	49	47
sp|P20456|IMPA1_BOVIN	sp|P20456|IMPA1_BOVIN	4	4	4	>sp|P20456|IMPA1_BOVIN Inositol monophosphatase 1 OS=Bos taurus OX=9913 GN=IMPA1 PE=1 SV=1	1	4	4	4	4	4	4	4	4	3	4	3	4	4	1	0	4	4	3	4	4	4	4	4	4	3	4	3	4	4	1	0	4	4	3	4	4	4	4	4	4	3	4	3
sp|P20488|SYPH_BOVIN	sp|P20488|SYPH_BOVIN	7	7	7	>sp|P20488|SYPH_BOVIN Synaptophysin OS=Bos taurus OX=9913 GN=SYP PE=1 SV=3	1	7	7	7	7	6	5	6	7	7	5	7	7	7	4	5	7	7	6	7	7	6	5	6	7	7	5	7	7	7	4	5	7	7	6	7	7	6	5	6	7	7	5	7
sp|P20616|SCG2_BOVIN	sp|P20616|SCG2_BOVIN	10	10	10	>sp|P20616|SCG2_BOVIN Secretogranin-2 OS=Bos taurus OX=9913 GN=SCG2 PE=2 SV=2	1	10	10	10	4	6	5	4	7	6	5	5	7	7	3	6	8	9	7	8	4	6	5	4	7	6	5	5	7	7	3	6	8	9	7	8	4	6	5	4	7	6	5	5
sp|P21282|VATC1_BOVIN	sp|P21282|VATC1_BOVIN	14	14	14	>sp|P21282|VATC1_BOVIN V-type proton ATPase subunit C 1 OS=Bos taurus OX=9913 GN=ATP6V1C1 PE=1 SV=3	1	14	14	14	13	12	14	12	14	13	12	13	14	14	6	6	13	13	12	13	13	12	14	12	14	13	12	13	14	14	6	6	13	13	12	13	13	12	14	12	14	13	12	13
sp|P21398|AOFA_BOVIN	sp|P21398|AOFA_BOVIN	13	13	10	>sp|P21398|AOFA_BOVIN Amine oxidase [flavin-containing] A OS=Bos taurus OX=9913 GN=MAOA PE=2 SV=2	1	13	13	10	10	11	10	8	10	12	11	12	12	12	10	11	11	12	13	13	10	11	10	8	10	12	11	12	12	12	10	11	11	12	13	13	7	8	7	5	7	9	8	9
sp|P21793|PGS2_BOVIN	sp|P21793|PGS2_BOVIN	10	10	10	>sp|P21793|PGS2_BOVIN Decorin OS=Bos taurus OX=9913 GN=DCN PE=1 SV=2	1	10	10	10	4	4	0	0	0	0	2	4	4	5	10	10	3	2	8	8	4	4	0	0	0	0	2	4	4	5	10	10	3	2	8	8	4	4	0	0	0	0	2	4
sp|P21809|PGS1_BOVIN	sp|P21809|PGS1_BOVIN	18	18	18	>sp|P21809|PGS1_BOVIN Biglycan OS=Bos taurus OX=9913 GN=BGN PE=1 SV=3	1	18	18	18	12	12	0	0	0	1	7	8	9	9	16	17	6	7	16	16	12	12	0	0	0	1	7	8	9	9	16	17	6	7	16	16	12	12	0	0	0	1	7	8
sp|P21856|GDIA_BOVIN	sp|P21856|GDIA_BOVIN	36	36	27	>sp|P21856|GDIA_BOVIN Rab GDP dissociation inhibitor alpha OS=Bos taurus OX=9913 GN=GDI1 PE=1 SV=1	1	36	36	27	33	31	33	34	33	35	30	31	34	34	23	25	32	30	32	33	33	31	33	34	33	35	30	31	34	34	23	25	32	30	32	33	24	22	25	26	24	26	21	22
sp|P22292|M2OM_BOVIN	sp|P22292|M2OM_BOVIN	18	18	18	>sp|P22292|M2OM_BOVIN Mitochondrial 2-oxoglutarate/malate carrier protein OS=Bos taurus OX=9913 GN=SLC25A11 PE=1 SV=3	1	18	18	18	16	16	16	13	16	16	17	17	17	18	8	7	15	15	18	18	16	16	16	13	16	16	17	17	17	18	8	7	15	15	18	18	16	16	16	13	16	16	17	17
sp|P22439|ODPX_BOVIN	sp|P22439|ODPX_BOVIN	8	8	8	>sp|P22439|ODPX_BOVIN Pyruvate dehydrogenase protein X component OS=Bos taurus OX=9913 GN=PDHX PE=1 SV=3	1	8	8	8	7	7	5	4	5	5	8	7	7	7	4	2	6	7	6	6	7	7	5	4	5	5	8	7	7	7	4	2	6	7	6	6	7	7	5	4	5	5	8	7
sp|P23004|QCR2_BOVIN	sp|P23004|QCR2_BOVIN	21	21	21	>sp|P23004|QCR2_BOVIN Cytochrome b-c1 complex subunit 2, mitochondrial OS=Bos taurus OX=9913 GN=UQCRC2 PE=1 SV=2	1	21	21	21	19	19	19	20	20	20	20	20	20	19	18	18	20	20	18	19	19	19	19	20	20	20	20	20	20	19	18	18	20	20	18	19	19	19	19	20	20	20	20	20
sp|P23356|UCHL1_BOVIN	sp|P23356|UCHL1_BOVIN	19	19	19	>sp|P23356|UCHL1_BOVIN Ubiquitin carboxyl-terminal hydrolase isozyme L1 OS=Bos taurus OX=9913 GN=UCHL1 PE=1 SV=2	1	19	19	19	19	19	18	17	19	18	19	19	19	18	18	17	18	19	18	19	19	19	18	17	19	18	19	19	19	18	18	17	18	19	18	19	19	19	18	17	19	18	19	19
sp|P23709|NDUS3_BOVIN	sp|P23709|NDUS3_BOVIN	15	15	15	>sp|P23709|NDUS3_BOVIN NADH dehydrogenase [ubiquinone] iron-sulfur protein 3, mitochondrial OS=Bos taurus OX=9913 GN=NDUFS3 PE=1 SV=1	1	15	15	15	12	13	12	13	13	13	14	13	13	15	8	7	13	13	14	13	12	13	12	13	13	13	14	13	13	15	8	7	13	13	14	13	12	13	12	13	13	13	14	13
sp|P23805|CONG_BOVIN;sp|P42916|CL43_BOVIN	sp|P23805|CONG_BOVIN	7;2	7;2	7;2	>sp|P23805|CONG_BOVIN Conglutinin OS=Bos taurus OX=9913 GN=CGN1 PE=1 SV=2	2	7	7	7	3	4	0	0	0	0	0	0	2	1	7	7	4	4	6	4	3	4	0	0	0	0	0	0	2	1	7	7	4	4	6	4	3	4	0	0	0	0	0	0
sp|P23934|NDUS6_BOVIN	sp|P23934|NDUS6_BOVIN	7	7	7	>sp|P23934|NDUS6_BOVIN NADH dehydrogenase [ubiquinone] iron-sulfur protein 6, mitochondrial OS=Bos taurus OX=9913 GN=NDUFS6 PE=1 SV=2	1	7	7	7	7	7	7	7	7	7	7	7	7	7	5	3	7	7	7	7	7	7	7	7	7	7	7	7	7	7	5	3	7	7	7	7	7	7	7	7	7	7	7	7
sp|P23935|NDUA5_BOVIN	sp|P23935|NDUA5_BOVIN	7	7	7	>sp|P23935|NDUA5_BOVIN NADH dehydrogenase [ubiquinone] 1 alpha subcomplex subunit 5 OS=Bos taurus OX=9913 GN=NDUFA5 PE=1 SV=3	1	7	7	7	6	6	7	7	7	6	7	7	7	7	4	4	6	6	6	6	6	6	7	7	7	6	7	7	7	7	4	4	6	6	6	6	6	6	7	7	7	6	7	7
sp|P24275|AKAP5_BOVIN	sp|P24275|AKAP5_BOVIN	4	4	4	>sp|P24275|AKAP5_BOVIN A-kinase anchor protein 5 OS=Bos taurus OX=9913 GN=AKAP5 PE=2 SV=1	1	4	4	4	3	3	3	2	4	4	3	4	4	4	1	1	3	4	3	4	3	3	3	2	4	4	3	4	4	4	1	1	3	4	3	4	3	3	3	2	4	4	3	4
sp|P25417|CYTB_BOVIN;sp|P35478|CYTX_BOVIN	sp|P25417|CYTB_BOVIN;sp|P35478|CYTX_BOVIN	4;4	4;4	4;4	>sp|P25417|CYTB_BOVIN Cystatin-B OS=Bos taurus OX=9913 GN=CSTB PE=1 SV=1;>sp|P35478|CYTX_BOVIN Stefin-C OS=Bos taurus OX=9913 PE=1 SV=1	2	4	4	4	3	3	3	3	3	3	3	3	3	3	2	2	3	3	3	4	3	3	3	3	3	3	3	3	3	3	2	2	3	3	3	4	3	3	3	3	3	3	3	3
sp|P25708|NDUV1_BOVIN	sp|P25708|NDUV1_BOVIN	22	22	22	>sp|P25708|NDUV1_BOVIN NADH dehydrogenase [ubiquinone] flavoprotein 1, mitochondrial OS=Bos taurus OX=9913 GN=NDUFV1 PE=1 SV=2	1	22	22	22	19	18	21	19	21	21	19	18	21	21	9	8	17	17	20	19	19	18	21	19	21	21	19	18	21	21	9	8	17	17	20	19	19	18	21	19	21	21	19	18
sp|P26452|RSSA_BOVIN	sp|P26452|RSSA_BOVIN	5	5	5	>sp|P26452|RSSA_BOVIN 40S ribosomal protein SA OS=Bos taurus OX=9913 GN=RPSA PE=2 SV=4	1	5	5	5	4	4	4	4	5	4	5	5	5	4	1	3	4	4	4	4	4	4	4	4	5	4	5	5	5	4	1	3	4	4	4	4	4	4	4	4	5	4	5	5
sp|P26779|SAP_BOVIN	sp|P26779|SAP_BOVIN	9	9	9	>sp|P26779|SAP_BOVIN Prosaposin OS=Bos taurus OX=9913 GN=PSAP PE=1 SV=3	1	9	9	9	7	7	9	9	9	9	7	6	9	9	3	4	8	8	8	8	7	7	9	9	9	9	7	6	9	9	3	4	8	8	8	8	7	7	9	9	9	9	7	6
sp|P26882|PPID_BOVIN	sp|P26882|PPID_BOVIN	4	4	4	>sp|P26882|PPID_BOVIN Peptidyl-prolyl cis-trans isomerase D OS=Bos taurus OX=9913 GN=PPID PE=1 SV=6	1	4	4	4	2	2	3	3	3	2	1	3	3	2	1	1	2	2	1	2	2	2	3	3	3	2	1	3	3	2	1	1	2	2	1	2	2	2	3	3	3	2	1	3
sp|P27595|HXK1_BOVIN	sp|P27595|HXK1_BOVIN	22	22	22	>sp|P27595|HXK1_BOVIN Hexokinase-1 OS=Bos taurus OX=9913 GN=HK1 PE=2 SV=1	1	22	22	22	22	22	21	19	19	19	21	21	22	22	15	13	20	21	20	20	22	22	21	19	19	19	21	21	22	22	15	13	20	21	20	20	22	22	21	19	19	19	21	21
sp|P27674|GTR1_BOVIN	sp|P27674|GTR1_BOVIN	5	5	5	>sp|P27674|GTR1_BOVIN Solute carrier family 2, facilitated glucose transporter member 1 OS=Bos taurus OX=9913 GN=SLC2A1 PE=1 SV=1	1	5	5	5	5	5	4	4	5	4	5	5	5	5	2	3	5	4	3	4	5	5	4	4	5	4	5	5	5	5	2	3	5	4	3	4	5	5	4	4	5	4	5	5
sp|P28801|GSTP1_BOVIN	sp|P28801|GSTP1_BOVIN	15	15	15	>sp|P28801|GSTP1_BOVIN Glutathione S-transferase P OS=Bos taurus OX=9913 GN=GSTP1 PE=1 SV=2	1	15	15	15	15	14	14	15	14	14	14	13	15	15	13	13	13	14	15	13	15	14	14	15	14	14	14	13	15	15	13	13	13	14	15	13	15	14	14	15	14	14	14	13
sp|P29104|HPCL4_BOVIN	sp|P29104|HPCL4_BOVIN	12	10	10	>sp|P29104|HPCL4_BOVIN Hippocalcin-like protein 4 OS=Bos taurus OX=9913 GN=HPCAL4 PE=1 SV=3	1	12	10	10	11	11	10	8	12	12	9	11	12	11	6	5	12	12	12	10	10	10	8	6	10	10	7	9	10	9	5	3	10	10	10	8	10	10	8	6	10	10	7	9
sp|P29105|HPCL1_BOVIN	sp|P29105|HPCL1_BOVIN	9	9	5	>sp|P29105|HPCL1_BOVIN Hippocalcin-like protein 1 OS=Bos taurus OX=9913 GN=HPCAL1 PE=1 SV=4	1	9	9	5	7	5	7	8	7	7	8	8	8	7	6	5	7	8	8	7	7	5	7	8	7	7	8	8	8	7	6	5	7	8	8	7	3	3	3	4	3	3	4	4
sp|P29172|TAU_BOVIN	sp|P29172|TAU_BOVIN	29	29	29	>sp|P29172|TAU_BOVIN Microtubule-associated protein tau OS=Bos taurus OX=9913 GN=MAPT PE=1 SV=3	1	29	29	29	28	27	29	28	28	27	27	25	26	26	19	19	27	27	26	26	28	27	29	28	28	27	27	25	26	26	19	19	27	27	26	26	28	27	29	28	28	27	27	25
sp|P30932|CD9_BOVIN	sp|P30932|CD9_BOVIN	6	6	6	>sp|P30932|CD9_BOVIN CD9 antigen OS=Bos taurus OX=9913 GN=CD9 PE=2 SV=2	1	6	6	6	6	6	6	6	6	6	5	6	6	6	3	2	6	6	6	6	6	6	6	6	6	6	5	6	6	6	3	2	6	6	6	6	6	6	6	6	6	6	5	6
sp|P31039|SDHA_BOVIN	sp|P31039|SDHA_BOVIN	22	22	22	>sp|P31039|SDHA_BOVIN Succinate dehydrogenase [ubiquinone] flavoprotein subunit, mitochondrial OS=Bos taurus OX=9913 GN=SDHA PE=1 SV=3	1	22	22	22	18	18	15	11	17	16	17	17	20	19	9	10	16	16	19	18	18	18	15	11	17	16	17	17	20	19	9	10	16	16	19	18	18	18	15	11	17	16	17	17
sp|P31081|CH60_BOVIN	sp|P31081|CH60_BOVIN	39	39	39	>sp|P31081|CH60_BOVIN 60 kDa heat shock protein, mitochondrial OS=Bos taurus OX=9913 GN=HSPD1 PE=1 SV=2	1	39	39	39	36	36	36	36	36	35	39	37	37	38	32	29	36	35	36	35	36	36	36	36	36	35	39	37	37	38	32	29	36	35	36	35	36	36	36	36	36	35	39	37
sp|P31322|KAP3_BOVIN	sp|P31322|KAP3_BOVIN	16	16	13	>sp|P31322|KAP3_BOVIN cAMP-dependent protein kinase type II-beta regulatory subunit OS=Bos taurus OX=9913 GN=PRKAR2B PE=2 SV=2	1	16	16	13	15	15	13	13	16	15	15	14	15	13	8	6	13	13	13	15	15	15	13	13	16	15	15	14	15	13	8	6	13	13	13	15	12	12	11	11	13	13	12	12
sp|P31404|VATA_BOVIN	sp|P31404|VATA_BOVIN	41	41	41	>sp|P31404|VATA_BOVIN V-type proton ATPase catalytic subunit A OS=Bos taurus OX=9913 GN=ATP6V1A PE=1 SV=2	1	41	41	41	36	35	35	35	38	40	38	39	39	39	27	24	37	37	37	36	36	35	35	35	38	40	38	39	39	39	27	24	37	37	37	36	36	35	35	35	38	40	38	39
sp|P31408|VATB2_BOVIN;sp|P31407|VATB1_BOVIN	sp|P31408|VATB2_BOVIN	32;9	32;9	32;9	>sp|P31408|VATB2_BOVIN V-type proton ATPase subunit B, brain isoform OS=Bos taurus OX=9913 GN=ATP6V1B2 PE=1 SV=3	2	32	32	32	28	31	28	28	30	30	32	30	29	31	18	17	31	30	27	28	28	31	28	28	30	30	32	30	29	31	18	17	31	30	27	28	28	31	28	28	30	30	32	30
sp|P31800|QCR1_BOVIN	sp|P31800|QCR1_BOVIN	23	23	23	>sp|P31800|QCR1_BOVIN Cytochrome b-c1 complex subunit 1, mitochondrial OS=Bos taurus OX=9913 GN=UQCRC1 PE=1 SV=2	1	23	23	23	21	22	21	23	22	22	22	23	22	23	16	15	23	23	21	21	21	22	21	23	22	22	22	23	22	23	16	15	23	23	21	21	21	22	21	23	22	22	22	23
sp|P31836|NCAM1_BOVIN	sp|P31836|NCAM1_BOVIN	42	42	42	>sp|P31836|NCAM1_BOVIN Neural cell adhesion molecule 1 OS=Bos taurus OX=9913 GN=NCAM1 PE=1 SV=1	1	42	42	42	38	39	37	39	39	37	39	41	40	37	28	29	39	40	38	36	38	39	37	39	39	37	39	41	40	37	28	29	39	40	38	36	38	39	37	39	39	37	39	41
sp|P31976|EZRI_BOVIN	sp|P31976|EZRI_BOVIN	18	18	12	>sp|P31976|EZRI_BOVIN Ezrin OS=Bos taurus OX=9913 GN=EZR PE=1 SV=2	1	18	18	12	16	16	16	16	14	15	16	17	15	16	13	12	16	16	16	17	16	16	16	16	14	15	16	17	15	16	13	12	16	16	16	17	11	10	10	10	8	9	10	11
sp|P32007|ADT3_BOVIN;sp|Q2YDD9|ADT4_BOVIN	sp|P32007|ADT3_BOVIN	23;3	12;0	8;0	>sp|P32007|ADT3_BOVIN ADP/ATP translocase 3 OS=Bos taurus OX=9913 GN=SLC25A6 PE=1 SV=3	2	23	12	8	22	22	20	19	21	21	23	23	23	23	11	11	21	20	22	22	11	11	9	10	11	11	12	12	12	12	6	6	10	10	11	11	8	8	5	6	7	7	8	8
sp|P32850|STX1A_BOVIN	sp|P32850|STX1A_BOVIN	20	16	16	>sp|P32850|STX1A_BOVIN Syntaxin-1A OS=Bos taurus OX=9913 GN=STX1A PE=1 SV=1	1	20	16	16	17	17	19	18	18	19	18	18	19	18	16	16	18	18	16	17	15	15	16	16	16	16	16	16	15	15	13	14	16	16	14	14	15	15	16	16	16	16	16	16
sp|P33097|AATC_BOVIN	sp|P33097|AATC_BOVIN	35	35	35	>sp|P33097|AATC_BOVIN Aspartate aminotransferase, cytoplasmic OS=Bos taurus OX=9913 GN=GOT1 PE=1 SV=3	1	35	35	35	32	35	32	32	33	32	33	33	33	34	20	22	33	33	31	30	32	35	32	32	33	32	33	33	33	34	20	22	33	33	31	30	32	35	32	32	33	32	33	33
sp|P33433|HRG_BOVIN	sp|P33433|HRG_BOVIN	4	4	4	>sp|P33433|HRG_BOVIN Histidine-rich glycoprotein (Fragments) OS=Bos taurus OX=9913 GN=HRG PE=1 SV=1	1	4	4	4	1	1	0	0	0	0	1	1	1	1	4	4	1	1	4	2	1	1	0	0	0	0	1	1	1	1	4	4	1	1	4	2	1	1	0	0	0	0	1	1
sp|P33567|SYUB_BOVIN;sp|Q9NZ50|SYUG_BOVIN	sp|P33567|SYUB_BOVIN	15;4	11;4	11;4	>sp|P33567|SYUB_BOVIN Beta-synuclein OS=Bos taurus OX=9913 GN=SNCB PE=1 SV=1	2	15	11	11	15	15	15	15	15	15	15	15	15	15	13	12	15	15	15	15	11	11	11	11	11	11	11	11	11	11	9	9	11	11	11	11	11	11	11	11	11	11	11	11
sp|P34942|NDUAA_BOVIN	sp|P34942|NDUAA_BOVIN	13	13	13	>sp|P34942|NDUAA_BOVIN NADH dehydrogenase [ubiquinone] 1 alpha subcomplex subunit 10, mitochondrial OS=Bos taurus OX=9913 GN=NDUFA10 PE=1 SV=1	1	13	13	13	11	13	9	9	10	10	12	11	13	11	6	5	12	12	9	11	11	13	9	9	10	10	12	11	13	11	6	5	12	12	9	11	11	13	9	9	10	10	12	11
sp|P34943|NDUA9_BOVIN	sp|P34943|NDUA9_BOVIN	15	15	15	>sp|P34943|NDUA9_BOVIN NADH dehydrogenase [ubiquinone] 1 alpha subcomplex subunit 9, mitochondrial OS=Bos taurus OX=9913 GN=NDUFA9 PE=1 SV=1	1	15	15	15	13	15	14	13	14	13	14	13	13	12	4	4	12	11	14	11	13	15	14	13	14	13	14	13	13	12	4	4	12	11	14	11	13	15	14	13	14	13	14	13
sp|P35466|S10A4_BOVIN	sp|P35466|S10A4_BOVIN	9	9	9	>sp|P35466|S10A4_BOVIN Protein S100-A4 OS=Bos taurus OX=9913 GN=S100A4 PE=1 SV=2	1	9	9	9	4	6	5	6	8	8	5	5	7	7	7	8	8	7	7	5	4	6	5	6	8	8	5	5	7	7	7	8	8	7	7	5	4	6	5	6	8	8	5	5
sp|P35705|PRDX3_BOVIN	sp|P35705|PRDX3_BOVIN	8	8	8	>sp|P35705|PRDX3_BOVIN Thioredoxin-dependent peroxide reductase, mitochondrial OS=Bos taurus OX=9913 GN=PRDX3 PE=1 SV=2	1	8	8	8	8	8	7	7	7	7	7	8	8	8	5	6	7	8	8	8	8	8	7	7	7	7	7	8	8	8	5	6	7	8	8	8	8	8	7	7	7	7	7	8
sp|P35722|NEUG_BOVIN	sp|P35722|NEUG_BOVIN	5	5	5	>sp|P35722|NEUG_BOVIN Neurogranin OS=Bos taurus OX=9913 GN=NRGN PE=1 SV=3	1	5	5	5	4	4	5	4	4	4	5	5	4	5	5	4	4	4	3	4	4	4	5	4	4	4	5	5	4	5	5	4	4	4	3	4	4	4	5	4	4	4	5	5
sp|P36225|MAP4_BOVIN	sp|P36225|MAP4_BOVIN	12	12	12	>sp|P36225|MAP4_BOVIN Microtubule-associated protein 4 OS=Bos taurus OX=9913 GN=MAP4 PE=1 SV=1	1	12	12	12	7	6	6	8	11	9	11	8	10	10	10	10	9	10	11	10	7	6	6	8	11	9	11	8	10	10	10	10	9	10	11	10	7	6	6	8	11	9	11	8
sp|P37359|MT3_BOVIN	sp|P37359|MT3_BOVIN	4	4	4	>sp|P37359|MT3_BOVIN Metallothionein-3 OS=Bos taurus OX=9913 GN=MT3 PE=1 SV=2	1	4	4	4	2	2	3	4	4	4	0	1	4	4	3	3	3	2	4	4	2	2	3	4	4	4	0	1	4	4	3	3	3	2	4	4	2	2	3	4	4	4	0	1
sp|P37980|IPYR_BOVIN	sp|P37980|IPYR_BOVIN	9	9	9	>sp|P37980|IPYR_BOVIN Inorganic pyrophosphatase OS=Bos taurus OX=9913 GN=PPA1 PE=1 SV=2	1	9	9	9	6	6	8	8	8	8	8	7	9	8	1	2	8	6	8	6	6	6	8	8	8	8	8	7	9	8	1	2	8	6	8	6	6	6	8	8	8	8	8	7
sp|P38657|PDIA3_BOVIN	sp|P38657|PDIA3_BOVIN	24	24	24	>sp|P38657|PDIA3_BOVIN Protein disulfide-isomerase A3 OS=Bos taurus OX=9913 GN=PDIA3 PE=2 SV=1	1	24	24	24	20	20	20	19	20	21	22	21	23	23	18	16	22	19	23	22	20	20	20	19	20	21	22	21	23	23	18	16	22	19	23	22	20	20	20	19	20	21	22	21
sp|P39872|RL3_BOVIN;sp|Q3SZ10|RL3L_BOVIN	sp|P39872|RL3_BOVIN	10;2	10;2	10;2	>sp|P39872|RL3_BOVIN 60S ribosomal protein L3 OS=Bos taurus OX=9913 GN=RPL3 PE=2 SV=2	2	10	10	10	7	8	8	9	8	9	9	8	10	10	6	7	10	9	8	7	7	8	8	9	8	9	9	8	10	10	6	7	10	9	8	7	7	8	8	9	8	9	9	8
sp|P39942|VATD_BOVIN	sp|P39942|VATD_BOVIN	8	8	8	>sp|P39942|VATD_BOVIN V-type proton ATPase subunit D OS=Bos taurus OX=9913 GN=ATP6V1D PE=1 SV=1	1	8	8	8	6	7	6	7	8	6	8	8	7	8	3	2	6	7	4	4	6	7	6	7	8	6	8	8	7	8	3	2	6	7	4	4	6	7	6	7	8	6	8	8
sp|P41500|ACYP1_BOVIN	sp|P41500|ACYP1_BOVIN	4	4	4	>sp|P41500|ACYP1_BOVIN Acylphosphatase-1 OS=Bos taurus OX=9913 GN=ACYP1 PE=1 SV=2	1	4	4	4	3	3	3	3	3	3	3	2	3	2	2	2	4	4	1	2	3	3	3	3	3	3	3	2	3	2	2	2	4	4	1	2	3	3	3	3	3	3	3	2
sp|P41563|IDH3A_BOVIN	sp|P41563|IDH3A_BOVIN	18	18	18	>sp|P41563|IDH3A_BOVIN Isocitrate dehydrogenase [NAD] subunit alpha, mitochondrial OS=Bos taurus OX=9913 GN=IDH3A PE=1 SV=1	1	18	18	18	18	17	14	16	18	17	18	18	17	17	13	11	17	17	17	16	18	17	14	16	18	17	18	18	17	17	13	11	17	17	17	16	18	17	14	16	18	17	18	18
sp|P41976|SODM_BOVIN	sp|P41976|SODM_BOVIN	10	10	10	>sp|P41976|SODM_BOVIN Superoxide dismutase [Mn], mitochondrial OS=Bos taurus OX=9913 GN=SOD2 PE=2 SV=1	1	10	10	10	10	10	8	7	7	7	9	10	10	10	5	5	10	9	8	10	10	10	8	7	7	7	9	10	10	10	5	5	10	9	8	10	10	10	8	7	7	7	9	10
sp|P42026|NDUS7_BOVIN	sp|P42026|NDUS7_BOVIN	7	7	7	>sp|P42026|NDUS7_BOVIN NADH dehydrogenase [ubiquinone] iron-sulfur protein 7, mitochondrial OS=Bos taurus OX=9913 GN=NDUFS7 PE=1 SV=1	1	7	7	7	7	7	6	5	5	7	6	6	7	7	2	4	5	5	6	5	7	7	6	5	5	7	6	6	7	7	2	4	5	5	6	5	7	7	6	5	5	7	6	6
sp|P42028|NDUS8_BOVIN	sp|P42028|NDUS8_BOVIN	6	6	6	>sp|P42028|NDUS8_BOVIN NADH dehydrogenase [ubiquinone] iron-sulfur protein 8, mitochondrial OS=Bos taurus OX=9913 GN=NDUFS8 PE=1 SV=1	1	6	6	6	6	6	6	6	6	6	6	5	5	6	4	2	5	5	5	5	6	6	6	6	6	6	6	5	5	6	4	2	5	5	5	5	6	6	6	6	6	6	6	5
sp|P42029|NDUA8_BOVIN	sp|P42029|NDUA8_BOVIN	10	10	10	>sp|P42029|NDUA8_BOVIN NADH dehydrogenase [ubiquinone] 1 alpha subcomplex subunit 8 OS=Bos taurus OX=9913 GN=NDUFA8 PE=1 SV=2	1	10	10	10	10	10	9	9	10	9	9	10	10	10	8	7	10	9	9	10	10	10	9	9	10	9	9	10	10	10	8	7	10	9	9	10	10	10	9	9	10	9	9	10
sp|P42659|DPP6_BOVIN	sp|P42659|DPP6_BOVIN	21	21	21	>sp|P42659|DPP6_BOVIN Dipeptidyl aminopeptidase-like protein 6 OS=Bos taurus OX=9913 GN=DPP6 PE=1 SV=1	1	21	21	21	18	18	19	18	19	19	18	18	21	21	7	5	18	20	17	13	18	18	19	18	19	19	18	18	21	21	7	5	18	20	17	13	18	18	19	18	19	19	18	18
sp|P42899|RLA2_BOVIN	sp|P42899|RLA2_BOVIN	7	7	7	>sp|P42899|RLA2_BOVIN 60S acidic ribosomal protein P2 OS=Bos taurus OX=9913 GN=RPLP2 PE=3 SV=1	1	7	7	7	7	6	7	7	7	7	7	7	7	6	6	5	7	7	7	7	7	6	7	7	7	7	7	7	7	6	6	5	7	7	7	7	7	6	7	7	7	7	7	7
sp|P43033|LIS1_BOVIN	sp|P43033|LIS1_BOVIN	11	11	11	>sp|P43033|LIS1_BOVIN Platelet-activating factor acetylhydrolase IB subunit beta OS=Bos taurus OX=9913 GN=PAFAH1B1 PE=1 SV=2	1	11	11	11	9	9	10	7	9	11	8	9	10	10	8	5	9	9	7	9	9	9	10	7	9	11	8	9	10	10	8	5	9	9	7	9	9	9	10	7	9	11	8	9
sp|P45478|PPT1_BOVIN	sp|P45478|PPT1_BOVIN	5	5	5	>sp|P45478|PPT1_BOVIN Palmitoyl-protein thioesterase 1 OS=Bos taurus OX=9913 GN=PPT1 PE=1 SV=1	1	5	5	5	2	3	4	3	3	4	3	2	4	4	1	1	3	3	2	3	2	3	4	3	3	4	3	2	4	4	1	1	3	3	2	3	2	3	4	3	3	4	3	2
sp|P45879|VDAC1_BOVIN	sp|P45879|VDAC1_BOVIN	21	21	21	>sp|P45879|VDAC1_BOVIN Voltage-dependent anion-selective channel protein 1 OS=Bos taurus OX=9913 GN=VDAC1 PE=1 SV=3	1	21	21	21	21	21	20	19	21	21	20	21	21	20	17	19	20	19	19	19	21	21	20	19	21	21	20	21	21	20	17	19	20	19	19	19	21	21	20	19	21	21	20	21
sp|P46193|ANXA1_BOVIN	sp|P46193|ANXA1_BOVIN	11	11	11	>sp|P46193|ANXA1_BOVIN Annexin A1 OS=Bos taurus OX=9913 GN=ANXA1 PE=1 SV=2	1	11	11	11	9	7	6	7	9	9	8	6	9	9	10	10	7	7	10	10	9	7	6	7	9	9	8	6	9	9	10	10	7	7	10	10	9	7	6	7	9	9	8	6
sp|P46196|MK01_BOVIN;sp|E1BMN8|NLK_BOVIN	sp|P46196|MK01_BOVIN	18;1	18;1	17;0	>sp|P46196|MK01_BOVIN Mitogen-activated protein kinase 1 OS=Bos taurus OX=9913 GN=MAPK1 PE=2 SV=3	2	18	18	17	17	18	18	17	18	18	18	17	18	18	12	12	17	18	17	17	17	18	18	17	18	18	18	17	18	18	12	12	17	18	17	17	16	17	17	16	17	17	17	16
sp|P46411|EAA1_BOVIN	sp|P46411|EAA1_BOVIN	13	13	13	>sp|P46411|EAA1_BOVIN Excitatory amino acid transporter 1 OS=Bos taurus OX=9913 GN=SLC1A3 PE=2 SV=1	1	13	13	13	12	11	10	11	13	13	12	13	13	13	10	8	12	12	12	12	12	11	10	11	13	13	12	13	13	13	10	8	12	12	12	12	12	11	10	11	13	13	12	13
sp|P48018|SYT1_BOVIN	sp|P48018|SYT1_BOVIN	30	30	30	>sp|P48018|SYT1_BOVIN Synaptotagmin-1 OS=Bos taurus OX=9913 GN=SYT1 PE=1 SV=1	1	30	30	30	29	29	28	28	28	29	29	29	28	28	19	20	29	28	30	29	29	29	28	28	28	29	29	29	28	28	19	20	29	28	30	29	29	29	28	28	28	29	29	29
sp|P48034|AOXA_BOVIN	sp|P48034|AOXA_BOVIN	5	5	5	>sp|P48034|AOXA_BOVIN Aldehyde oxidase 1 OS=Bos taurus OX=9913 GN=AOX1 PE=1 SV=2	1	5	5	5	1	2	1	1	1	0	3	3	4	4	5	4	3	3	5	5	1	2	1	1	1	0	3	3	4	4	5	4	3	3	5	5	1	2	1	1	1	0	3	3
sp|P48305|NDUB4_BOVIN	sp|P48305|NDUB4_BOVIN	4	4	4	>sp|P48305|NDUB4_BOVIN NADH dehydrogenase [ubiquinone] 1 beta subcomplex subunit 4 OS=Bos taurus OX=9913 GN=NDUFB4 PE=1 SV=2	1	4	4	4	4	3	4	3	4	4	4	4	3	4	2	2	3	3	3	3	4	3	4	3	4	4	4	4	3	4	2	2	3	3	3	3	4	3	4	3	4	4	4	4
sp|P48452|PP2BA_BOVIN	sp|P48452|PP2BA_BOVIN	26	26	26	>sp|P48452|PP2BA_BOVIN Serine/threonine-protein phosphatase 2B catalytic subunit alpha isoform OS=Bos taurus OX=9913 GN=PPP3CA PE=1 SV=1	1	26	26	26	23	23	21	21	23	22	22	22	23	24	11	13	22	20	20	22	23	23	21	21	23	22	22	22	23	24	11	13	22	20	20	22	23	23	21	21	23	22	22	22
sp|P48616|VIME_BOVIN	sp|P48616|VIME_BOVIN	73	68	60	>sp|P48616|VIME_BOVIN Vimentin OS=Bos taurus OX=9913 GN=VIM PE=1 SV=3	1	73	68	60	59	61	43	44	45	40	62	65	58	60	67	69	62	58	70	71	54	57	39	39	40	36	57	60	54	56	62	64	57	53	65	66	47	49	34	33	35	30	50	53
sp|P48644|AL1A1_BOVIN	sp|P48644|AL1A1_BOVIN	16	16	16	>sp|P48644|AL1A1_BOVIN Aldehyde dehydrogenase 1A1 OS=Bos taurus OX=9913 GN=ALDH1A1 PE=1 SV=3	1	16	16	16	7	9	3	3	2	4	7	6	5	5	13	14	6	9	10	9	7	9	3	3	2	4	7	6	5	5	13	14	6	9	10	9	7	9	3	3	2	4	7	6
sp|P49410|EFTU_BOVIN	sp|P49410|EFTU_BOVIN	25	25	25	>sp|P49410|EFTU_BOVIN Elongation factor Tu, mitochondrial OS=Bos taurus OX=9913 GN=TUFM PE=1 SV=1	1	25	25	25	24	25	22	21	22	24	24	23	24	24	17	17	19	18	22	20	24	25	22	21	22	24	24	23	24	24	17	17	19	18	22	20	24	25	22	21	22	24	24	23
sp|P49951|CLH1_BOVIN	sp|P49951|CLH1_BOVIN	102	102	102	>sp|P49951|CLH1_BOVIN Clathrin heavy chain 1 OS=Bos taurus OX=9913 GN=CLTC PE=1 SV=1	1	102	102	102	94	94	86	90	96	94	100	99	99	99	58	60	96	93	92	92	94	94	86	90	96	94	100	99	99	99	58	60	96	93	92	92	94	94	86	90	96	94	100	99
sp|P50397|GDIB_BOVIN	sp|P50397|GDIB_BOVIN	31	22	22	>sp|P50397|GDIB_BOVIN Rab GDP dissociation inhibitor beta OS=Bos taurus OX=9913 GN=GDI2 PE=2 SV=3	1	31	22	22	29	29	29	29	31	29	28	29	30	29	16	16	29	29	26	28	20	20	21	21	22	20	19	20	21	20	8	8	20	20	18	20	20	20	21	21	22	20	19	20
sp|P51176|TGM2_BOVIN	sp|P51176|TGM2_BOVIN	7	7	7	>sp|P51176|TGM2_BOVIN Protein-glutamine gamma-glutamyltransferase 2 OS=Bos taurus OX=9913 GN=TGM2 PE=1 SV=1	1	7	7	7	2	2	1	1	1	1	1	1	2	3	4	5	3	2	6	6	2	2	1	1	1	1	1	1	2	3	4	5	3	2	6	6	2	2	1	1	1	1	1	1
sp|P52193|CALR_BOVIN	sp|P52193|CALR_BOVIN	17	17	17	>sp|P52193|CALR_BOVIN Calreticulin OS=Bos taurus OX=9913 GN=CALR PE=1 SV=2	1	17	17	17	13	13	12	11	15	15	14	16	16	16	11	11	15	16	16	16	13	13	12	11	15	15	14	16	16	16	11	11	15	16	16	16	13	13	12	11	15	15	14	16
sp|P52556|BLVRB_BOVIN	sp|P52556|BLVRB_BOVIN	14	14	14	>sp|P52556|BLVRB_BOVIN Flavin reductase (NADPH) OS=Bos taurus OX=9913 GN=BLVRB PE=1 SV=2	1	14	14	14	13	13	8	7	8	8	10	11	11	11	14	14	9	11	10	12	13	13	8	7	8	8	10	11	11	11	14	14	9	11	10	12	13	13	8	7	8	8	10	11
sp|P53712|ITB1_BOVIN	sp|P53712|ITB1_BOVIN	5	5	5	>sp|P53712|ITB1_BOVIN Integrin beta-1 OS=Bos taurus OX=9913 GN=ITGB1 PE=1 SV=3	1	5	5	5	3	2	4	3	3	3	4	3	3	4	5	5	4	4	5	5	3	2	4	3	3	3	4	3	3	4	5	5	4	4	5	5	3	2	4	3	3	3	4	3
sp|P55052|FABP5_BOVIN	sp|P55052|FABP5_BOVIN	16	16	16	>sp|P55052|FABP5_BOVIN Fatty acid-binding protein 5 OS=Bos taurus OX=9913 GN=FABP5 PE=1 SV=4	1	16	16	16	16	14	13	15	16	16	14	14	16	16	12	12	16	15	15	15	16	14	13	15	16	16	14	14	16	16	12	12	16	15	15	15	16	14	13	15	16	16	14	14
sp|P55252|HPLN1_BOVIN	sp|P55252|HPLN1_BOVIN	12	12	12	>sp|P55252|HPLN1_BOVIN Hyaluronan and proteoglycan link protein 1 OS=Bos taurus OX=9913 GN=HAPLN1 PE=2 SV=1	1	12	12	12	10	8	10	10	9	8	11	9	10	9	6	5	10	9	11	11	10	8	10	10	9	8	11	9	10	9	6	5	10	9	11	11	10	8	10	10	9	8	11	9
sp|P55803|MOG_BOVIN	sp|P55803|MOG_BOVIN	17	17	17	>sp|P55803|MOG_BOVIN Myelin-oligodendrocyte glycoprotein OS=Bos taurus OX=9913 GN=MOG PE=1 SV=1	1	17	17	17	16	16	17	17	17	16	15	14	17	17	9	9	14	13	10	8	16	16	17	17	17	16	15	14	17	17	9	9	14	13	10	8	16	16	17	17	17	16	15	14
sp|P55859|PNPH_BOVIN	sp|P55859|PNPH_BOVIN	9	9	9	>sp|P55859|PNPH_BOVIN Purine nucleoside phosphorylase OS=Bos taurus OX=9913 GN=PNP PE=1 SV=3	1	9	9	9	8	9	8	7	9	9	8	8	9	9	6	7	8	8	8	8	8	9	8	7	9	9	8	8	9	9	6	7	8	8	8	8	8	9	8	7	9	9	8	8
sp|P56560|AOFB_BOVIN	sp|P56560|AOFB_BOVIN	10	7	7	>sp|P56560|AOFB_BOVIN Amine oxidase [flavin-containing] B OS=Bos taurus OX=9913 GN=MAOB PE=1 SV=4	1	10	7	7	8	8	5	7	8	6	9	9	10	9	6	6	10	10	8	9	5	5	2	4	5	3	6	6	7	6	3	3	7	7	5	6	5	5	2	4	5	3	6	6
sp|P56701|PSMD2_BOVIN	sp|P56701|PSMD2_BOVIN	12	12	12	>sp|P56701|PSMD2_BOVIN 26S proteasome non-ATPase regulatory subunit 2 OS=Bos taurus OX=9913 GN=PSMD2 PE=1 SV=2	1	12	12	12	8	8	12	9	11	10	7	9	10	10	8	7	7	9	5	9	8	8	12	9	11	10	7	9	10	10	8	7	7	9	5	9	8	8	12	9	11	10	7	9
sp|P56965|DDAH1_BOVIN	sp|P56965|DDAH1_BOVIN	21	21	20	>sp|P56965|DDAH1_BOVIN N(G),N(G)-dimethylarginine dimethylaminohydrolase 1 OS=Bos taurus OX=9913 GN=DDAH1 PE=1 SV=3	1	21	21	20	20	20	20	20	18	19	19	19	19	18	13	12	19	19	19	19	20	20	20	20	18	19	19	19	19	18	13	12	19	19	19	19	19	19	19	19	17	18	18	18
sp|P58352|GTR3_BOVIN	sp|P58352|GTR3_BOVIN	5	5	4	>sp|P58352|GTR3_BOVIN Solute carrier family 2, facilitated glucose transporter member 3 OS=Bos taurus OX=9913 GN=SLC2A3 PE=2 SV=1	1	5	5	4	5	5	5	5	5	5	5	5	5	5	3	1	4	5	5	4	5	5	5	5	5	5	5	5	5	5	3	1	4	5	5	4	4	4	4	4	4	4	4	4
sp|P58875|S14L2_BOVIN	sp|P58875|S14L2_BOVIN	8	8	8	>sp|P58875|S14L2_BOVIN SEC14-like protein 2 OS=Bos taurus OX=9913 GN=SEC14L2 PE=1 SV=2	1	8	8	8	6	5	7	5	7	5	8	7	7	8	5	4	8	8	8	8	6	5	7	5	7	5	8	7	7	8	5	4	8	8	8	8	6	5	7	5	7	5	8	7
sp|P60661|MYL6_BOVIN	sp|P60661|MYL6_BOVIN	7	7	7	>sp|P60661|MYL6_BOVIN Myosin light polypeptide 6 OS=Bos taurus OX=9913 GN=MYL6 PE=2 SV=2	1	7	7	7	7	7	6	7	7	7	7	7	7	7	7	7	7	7	7	7	7	7	6	7	7	7	7	7	7	7	7	7	7	7	7	7	7	7	6	7	7	7	7	7
sp|P63258|ACTG_BOVIN;sp|P60712|ACTB_BOVIN	sp|P63258|ACTG_BOVIN;sp|P60712|ACTB_BOVIN	38;38	38;38	20;20	>sp|P63258|ACTG_BOVIN Actin, cytoplasmic 2 OS=Bos taurus OX=9913 GN=ACTG1 PE=1 SV=1;>sp|P60712|ACTB_BOVIN Actin, cytoplasmic 1 OS=Bos taurus OX=9913 GN=ACTB PE=1 SV=1	2	38	38	20	35	35	34	35	33	33	35	35	36	35	31	31	33	33	35	35	35	35	34	35	33	33	35	35	36	35	31	31	33	33	35	35	18	17	16	18	16	16	18	19
sp|P60984|GMFB_BOVIN;sp|Q56JZ9|GMFG_BOVIN	sp|P60984|GMFB_BOVIN	5;2	5;2	5;2	>sp|P60984|GMFB_BOVIN Glia maturation factor beta OS=Bos taurus OX=9913 GN=GMFB PE=1 SV=2	2	5	5	5	3	3	5	5	5	5	3	4	5	5	3	3	3	3	3	2	3	3	5	5	5	5	3	4	5	5	3	3	3	3	3	2	3	3	5	5	5	5	3	4
sp|P61157|ARP3_BOVIN	sp|P61157|ARP3_BOVIN	15	15	15	>sp|P61157|ARP3_BOVIN Actin-related protein 3 OS=Bos taurus OX=9913 GN=ACTR3 PE=1 SV=3	1	15	15	15	11	10	12	12	11	11	9	9	13	13	5	5	12	10	10	11	11	10	12	12	11	11	9	9	13	13	5	5	12	10	10	11	11	10	12	12	11	11	9	9
sp|P61223|RAP1B_BOVIN	sp|P61223|RAP1B_BOVIN	15	4	4	>sp|P61223|RAP1B_BOVIN Ras-related protein Rap-1b OS=Bos taurus OX=9913 GN=RAP1B PE=2 SV=1	1	15	4	4	14	13	13	12	13	13	12	13	13	14	10	10	12	14	13	13	3	3	3	3	3	3	3	3	3	3	2	3	2	3	3	3	3	3	3	3	3	3	3	3
sp|P61267|STX1B_BOVIN	sp|P61267|STX1B_BOVIN	23	23	19	>sp|P61267|STX1B_BOVIN Syntaxin-1B OS=Bos taurus OX=9913 GN=STX1B PE=1 SV=1	1	23	23	19	21	21	20	19	20	22	21	20	21	21	18	16	18	19	19	17	21	21	20	19	20	22	21	20	21	21	18	16	18	19	19	17	19	19	17	17	18	19	19	18
sp|P61284|RL12_BOVIN	sp|P61284|RL12_BOVIN	4	4	4	>sp|P61284|RL12_BOVIN 60S ribosomal protein L12 OS=Bos taurus OX=9913 GN=RPL12 PE=2 SV=1	1	4	4	4	2	2	3	3	3	3	4	4	4	4	1	1	3	4	3	4	2	2	3	3	3	3	4	4	4	4	1	1	3	4	3	4	2	2	3	3	3	3	4	4
sp|P61286|PABP1_BOVIN	sp|P61286|PABP1_BOVIN	8	8	8	>sp|P61286|PABP1_BOVIN Polyadenylate-binding protein 1 OS=Bos taurus OX=9913 GN=PABPC1 PE=2 SV=1	1	8	8	8	5	4	5	6	5	5	7	6	6	7	1	2	5	4	4	4	5	4	5	6	5	5	7	6	6	7	1	2	5	4	4	4	5	4	5	6	5	5	7	6
sp|P61356|RL27_BOVIN	sp|P61356|RL27_BOVIN	4	4	4	>sp|P61356|RL27_BOVIN 60S ribosomal protein L27 OS=Bos taurus OX=9913 GN=RPL27 PE=2 SV=2	1	4	4	4	4	4	4	4	4	4	4	4	4	4	4	4	4	4	4	4	4	4	4	4	4	4	4	4	4	4	4	4	4	4	4	4	4	4	4	4	4	4	4	4
sp|P61420|VA0D1_BOVIN	sp|P61420|VA0D1_BOVIN	11	11	11	>sp|P61420|VA0D1_BOVIN V-type proton ATPase subunit d 1 OS=Bos taurus OX=9913 GN=ATP6V0D1 PE=1 SV=1	1	11	11	11	9	9	8	7	10	11	9	10	11	9	6	6	9	9	10	10	9	9	8	7	10	11	9	10	11	9	6	6	9	9	10	10	9	9	8	7	10	11	9	10
sp|P61585|RHOA_BOVIN	sp|P61585|RHOA_BOVIN	13	13	5	>sp|P61585|RHOA_BOVIN Transforming protein RhoA OS=Bos taurus OX=9913 GN=RHOA PE=1 SV=1	1	13	13	5	10	11	11	11	12	13	12	10	13	13	9	8	11	12	11	11	10	11	11	11	12	13	12	10	13	13	9	8	11	12	11	11	4	5	5	5	5	5	5	5
sp|P61602|NCALD_BOVIN	sp|P61602|NCALD_BOVIN	8	6	5	>sp|P61602|NCALD_BOVIN Neurocalcin-delta OS=Bos taurus OX=9913 GN=NCALD PE=1 SV=2	1	8	6	5	7	6	8	8	7	6	7	7	8	8	5	4	8	8	7	7	5	5	6	6	5	4	5	5	6	6	3	3	6	6	5	5	4	4	5	5	4	3	4	4
sp|P61603|CH10_BOVIN	sp|P61603|CH10_BOVIN	12	12	12	>sp|P61603|CH10_BOVIN 10 kDa heat shock protein, mitochondrial OS=Bos taurus OX=9913 GN=HSPE1 PE=3 SV=2	1	12	12	12	12	11	11	12	12	12	12	12	12	12	8	8	12	11	11	11	12	11	11	12	12	12	12	12	12	12	8	8	12	11	11	11	12	11	11	12	12	12	12	12
sp|P61763|STXB1_BOVIN	sp|P61763|STXB1_BOVIN	62	62	62	>sp|P61763|STXB1_BOVIN Syntaxin-binding protein 1 OS=Bos taurus OX=9913 GN=STXBP1 PE=1 SV=1	1	62	62	62	57	57	58	59	60	60	58	59	59	61	43	38	57	58	57	60	57	57	58	59	60	60	58	59	59	61	43	38	57	58	57	60	57	57	58	59	60	60	58	59
sp|P62157|CALM_BOVIN	sp|P62157|CALM_BOVIN	13	13	13	>sp|P62157|CALM_BOVIN Calmodulin OS=Bos taurus OX=9913 GN=CALM PE=1 SV=2	1	13	13	13	12	12	13	13	12	13	12	12	12	11	12	12	12	13	12	12	12	12	13	13	12	13	12	12	12	11	12	12	12	13	12	12	12	12	13	13	12	13	12	12
sp|P62194|PRS8_BOVIN	sp|P62194|PRS8_BOVIN	10	10	10	>sp|P62194|PRS8_BOVIN 26S proteasome regulatory subunit 8 OS=Bos taurus OX=9913 GN=PSMC5 PE=2 SV=1	1	10	10	10	4	4	5	6	5	5	8	7	5	7	3	3	8	8	5	6	4	4	5	6	5	5	8	7	5	7	3	3	8	8	5	6	4	4	5	6	5	5	8	7
sp|P62261|1433E_BOVIN	sp|P62261|1433E_BOVIN	28	25	25	>sp|P62261|1433E_BOVIN 14-3-3 protein epsilon OS=Bos taurus OX=9913 GN=YWHAE PE=2 SV=1	1	28	25	25	28	28	24	27	27	27	26	28	28	27	21	23	26	26	28	28	25	25	22	24	24	24	23	25	25	24	19	21	23	23	25	25	25	25	22	24	24	24	23	25
sp|P62326|TYB4_BOVIN	sp|P62326|TYB4_BOVIN	10	10	9	>sp|P62326|TYB4_BOVIN Thymosin beta-4 OS=Bos taurus OX=9913 GN=TMSB4 PE=1 SV=2	1	10	10	9	9	7	10	10	9	10	10	10	9	8	8	9	10	10	9	10	9	7	10	10	9	10	10	10	9	8	8	9	10	10	9	10	8	6	9	9	8	9	9	9
sp|P62763|VISL1_BOVIN	sp|P62763|VISL1_BOVIN	20	20	18	>sp|P62763|VISL1_BOVIN Visinin-like protein 1 OS=Bos taurus OX=9913 GN=VSNL1 PE=1 SV=2	1	20	20	18	19	19	19	19	20	18	19	20	19	19	14	13	19	18	18	18	19	19	19	19	20	18	19	20	19	19	14	13	19	18	18	18	18	18	17	17	18	16	17	18
sp|P62803|H4_BOVIN	sp|P62803|H4_BOVIN	17	17	17	>sp|P62803|H4_BOVIN Histone H4 OS=Bos taurus OX=9913 PE=1 SV=2	1	17	17	17	16	17	15	14	16	16	17	15	16	15	16	16	14	14	16	16	16	17	15	14	16	16	17	15	16	15	16	16	14	14	16	16	16	17	15	14	16	16	17	15
sp|P62808|H2B1_BOVIN;sp|Q32L48|H2B1N_BOVIN;sp|Q2M2T1|H2B1K_BOVIN	sp|P62808|H2B1_BOVIN;sp|Q32L48|H2B1N_BOVIN;sp|Q2M2T1|H2B1K_BOVIN	14;12;12	14;12;12	14;12;12	>sp|P62808|H2B1_BOVIN Histone H2B type 1 OS=Bos taurus OX=9913 PE=1 SV=2;>sp|Q32L48|H2B1N_BOVIN Histone H2B type 1-N OS=Bos taurus OX=9913 GN=H2BC15 PE=1 SV=3;>sp|Q2M2T1|H2B1K_BOVIN Histone H2B type 1-K OS=Bos taurus OX=9913 GN=H2BC12 PE=1 SV=3	3	14	14	14	13	14	13	14	13	14	13	12	14	13	13	11	11	13	13	13	13	14	13	14	13	14	13	12	14	13	13	11	11	13	13	13	13	14	13	14	13	14	13	12
sp|P62833|RAP1A_BOVIN	sp|P62833|RAP1A_BOVIN	15	15	4	>sp|P62833|RAP1A_BOVIN Ras-related protein Rap-1A OS=Bos taurus OX=9913 GN=RAP1A PE=1 SV=1	1	15	15	4	15	13	14	12	12	13	10	11	12	15	9	7	12	13	12	12	15	13	14	12	12	13	10	11	12	15	9	7	12	13	12	12	4	3	4	3	2	3	1	1
sp|P62871|GBB1_BOVIN	sp|P62871|GBB1_BOVIN	16	10	10	>sp|P62871|GBB1_BOVIN Guanine nucleotide-binding protein G(I)/G(S)/G(T) subunit beta-1 OS=Bos taurus OX=9913 GN=GNB1 PE=1 SV=3	1	16	10	10	15	15	15	15	16	16	16	15	16	16	14	13	16	15	15	16	10	10	9	10	10	10	10	10	10	10	9	8	10	10	10	10	10	10	9	10	10	10	10	10
sp|P62935|PPIA_BOVIN;sp|A4FV72|PPIE_BOVIN	sp|P62935|PPIA_BOVIN	15;1	15;1	15;1	>sp|P62935|PPIA_BOVIN Peptidyl-prolyl cis-trans isomerase A OS=Bos taurus OX=9913 GN=PPIA PE=1 SV=2	2	15	15	15	15	15	15	15	15	15	15	15	15	15	12	13	14	14	15	14	15	15	15	15	15	15	15	15	15	15	12	13	14	14	15	14	15	15	15	15	15	15	15	15
sp|P62958|HINT1_BOVIN	sp|P62958|HINT1_BOVIN	9	9	9	>sp|P62958|HINT1_BOVIN Adenosine 5-monophosphoramidase HINT1 OS=Bos taurus OX=9913 GN=HINT1 PE=1 SV=2	1	9	9	9	7	8	7	9	8	8	8	8	8	7	5	6	8	8	9	9	7	8	7	9	8	8	8	8	8	7	5	6	8	8	9	9	7	8	7	9	8	8	8	8
sp|P62964|RABP1_BOVIN	sp|P62964|RABP1_BOVIN	9	9	8	>sp|P62964|RABP1_BOVIN Cellular retinoic acid-binding protein 1 OS=Bos taurus OX=9913 GN=CRABP1 PE=1 SV=2	1	9	9	8	5	5	2	1	1	1	4	5	4	2	8	8	3	2	9	9	5	5	2	1	1	1	4	5	4	2	8	8	3	2	9	9	5	4	2	1	1	1	4	4
sp|P62998|RAC1_BOVIN	sp|P62998|RAC1_BOVIN	11	11	5	>sp|P62998|RAC1_BOVIN Ras-related C3 botulinum toxin substrate 1 OS=Bos taurus OX=9913 GN=RAC1 PE=1 SV=1	1	11	11	5	9	8	9	9	10	10	7	8	10	10	6	7	7	7	8	7	9	8	9	9	10	10	7	8	10	10	6	7	7	7	8	7	4	4	4	4	4	4	3	3
sp|P63009|AP2B1_BOVIN;sp|Q08DS7|AP1B1_BOVIN	sp|P63009|AP2B1_BOVIN;sp|Q08DS7|AP1B1_BOVIN	41;41	41;41	41;41	>sp|P63009|AP2B1_BOVIN AP-2 complex subunit beta OS=Bos taurus OX=9913 GN=AP2B1 PE=1 SV=2;>sp|Q08DS7|AP1B1_BOVIN AP-1 complex subunit beta-1 OS=Bos taurus OX=9913 GN=AP2B1 PE=2 SV=1	2	41	41	41	37	38	31	34	39	34	39	36	38	39	23	23	37	35	37	38	37	38	31	34	39	34	39	36	38	39	23	23	37	35	37	38	37	38	31	34	39	34	39	36
sp|P63026|VAMP2_BOVIN;sp|Q2KJD2|VAMP3_BOVIN	sp|P63026|VAMP2_BOVIN;sp|Q2KJD2|VAMP3_BOVIN	8;6	8;6	5;3	>sp|P63026|VAMP2_BOVIN Vesicle-associated membrane protein 2 OS=Bos taurus OX=9913 GN=VAMP2 PE=1 SV=2;>sp|Q2KJD2|VAMP3_BOVIN Vesicle-associated membrane protein 3 OS=Bos taurus OX=9913 GN=VAMP3 PE=3 SV=1	2	8	8	5	7	8	6	7	7	7	7	8	7	7	6	5	7	8	8	6	7	8	6	7	7	7	7	8	7	7	6	5	7	8	8	6	4	5	3	5	4	4	4	5
sp|P63097|GNAI1_BOVIN;sp|P04695|GNAT1_BOVIN;sp|P0C7Q4|GNAT3_BOVIN;sp|P04696|GNAT2_BOVIN	sp|P63097|GNAI1_BOVIN	23;2;2;2	20;1;1;1	20;1;1;1	>sp|P63097|GNAI1_BOVIN Guanine nucleotide-binding protein G(i) subunit alpha-1 OS=Bos taurus OX=9913 GN=GNAI1 PE=1 SV=2	4	23	20	20	22	20	22	22	22	20	19	20	22	22	12	12	21	20	22	20	19	17	19	19	19	17	16	17	19	19	10	9	18	17	19	17	19	17	19	19	19	17	16	17
sp|P63099|CANB1_BOVIN	sp|P63099|CANB1_BOVIN	12	12	12	>sp|P63099|CANB1_BOVIN Calcineurin subunit B type 1 OS=Bos taurus OX=9913 GN=PPP3R1 PE=1 SV=2	1	12	12	12	11	11	10	11	10	11	11	11	11	10	5	5	10	9	11	10	11	11	10	11	10	11	11	11	11	10	5	5	10	9	11	10	11	11	10	11	10	11	11	11
sp|P63103|1433Z_BOVIN	sp|P63103|1433Z_BOVIN	32	32	24	>sp|P63103|1433Z_BOVIN 14-3-3 protein zeta/delta OS=Bos taurus OX=9913 GN=YWHAZ PE=1 SV=1	1	32	32	24	32	31	31	32	32	32	31	31	32	32	24	25	32	32	32	30	32	31	31	32	32	32	31	31	32	32	24	25	32	32	32	30	24	24	24	24	24	24	23	23
sp|P63243|RACK1_BOVIN	sp|P63243|RACK1_BOVIN	5	5	5	>sp|P63243|RACK1_BOVIN Receptor of activated protein C kinase 1 OS=Bos taurus OX=9913 GN=RACK1 PE=2 SV=3	1	5	5	5	3	3	4	5	4	4	3	3	5	5	3	2	4	4	3	4	3	3	4	5	4	4	3	3	5	5	3	2	4	4	3	4	3	3	4	5	4	4	3	3
sp|P67774|PP2AA_BOVIN	sp|P67774|PP2AA_BOVIN	12	12	2	>sp|P67774|PP2AA_BOVIN Serine/threonine-protein phosphatase 2A catalytic subunit alpha isoform OS=Bos taurus OX=9913 GN=PPP2CA PE=1 SV=1	1	12	12	2	7	7	9	10	11	10	10	8	12	12	1	4	10	9	8	10	7	7	9	10	11	10	10	8	12	12	1	4	10	9	8	10	1	1	2	2	2	1	1	0
sp|P68002|VDAC2_BOVIN	sp|P68002|VDAC2_BOVIN	16	16	16	>sp|P68002|VDAC2_BOVIN Voltage-dependent anion-selective channel protein 2 OS=Bos taurus OX=9913 GN=VDAC2 PE=2 SV=2	1	16	16	16	16	16	15	15	15	15	15	15	15	15	13	13	15	16	15	16	16	16	15	15	15	15	15	15	15	15	13	13	15	16	15	16	16	16	15	15	15	15	15	15
sp|P68103|EF1A1_BOVIN	sp|P68103|EF1A1_BOVIN	19	9	9	>sp|P68103|EF1A1_BOVIN Elongation factor 1-alpha 1 OS=Bos taurus OX=9913 GN=EEF1A1 PE=1 SV=1	1	19	9	9	19	17	17	16	17	17	17	18	19	18	17	12	18	17	19	17	9	8	8	6	8	8	8	9	9	9	9	6	9	8	9	8	9	8	8	6	8	8	8	9
sp|P68250|1433B_BOVIN	sp|P68250|1433B_BOVIN	24	15	15	>sp|P68250|1433B_BOVIN 14-3-3 protein beta/alpha OS=Bos taurus OX=9913 GN=YWHAB PE=1 SV=2	1	24	15	15	23	23	22	24	24	24	24	24	24	23	17	18	24	24	23	21	14	14	14	15	15	15	15	15	15	14	10	11	15	15	14	12	14	14	14	15	15	15	15	15
sp|P68252|1433G_BOVIN	sp|P68252|1433G_BOVIN	26	21	18	>sp|P68252|1433G_BOVIN 14-3-3 protein gamma OS=Bos taurus OX=9913 GN=YWHAG PE=1 SV=2	1	26	21	18	26	25	21	21	23	24	25	24	25	25	20	21	25	24	25	24	21	21	17	16	18	19	20	19	20	20	17	18	20	19	20	20	18	18	14	13	15	16	17	16
sp|P68265|GLTP_BOVIN	sp|P68265|GLTP_BOVIN	4	4	4	>sp|P68265|GLTP_BOVIN Glycolipid transfer protein OS=Bos taurus OX=9913 GN=GLTP PE=1 SV=2	1	4	4	4	3	3	4	4	4	4	3	2	3	3	1	1	2	2	4	2	3	3	4	4	4	4	3	2	3	3	1	1	2	2	4	2	3	3	4	4	4	4	3	2
sp|P68399|CSK21_BOVIN	sp|P68399|CSK21_BOVIN	4	4	4	>sp|P68399|CSK21_BOVIN Casein kinase II subunit alpha OS=Bos taurus OX=9913 GN=CSNK2A1 PE=1 SV=1	1	4	4	4	3	2	2	4	3	4	3	3	3	4	2	2	3	3	2	3	3	2	2	4	3	4	3	3	3	4	2	2	3	3	2	3	3	2	2	4	3	4	3	3
sp|P68401|PA1B2_BOVIN	sp|P68401|PA1B2_BOVIN	5	5	5	>sp|P68401|PA1B2_BOVIN Platelet-activating factor acetylhydrolase IB subunit alpha2 OS=Bos taurus OX=9913 GN=PAFAH1B2P68402 PE=1 SV=1	1	5	5	5	4	5	3	2	3	4	5	5	5	5	3	3	4	5	5	5	4	5	3	2	3	4	5	5	5	5	3	3	4	5	5	5	4	5	3	2	3	4	5	5
sp|P68509|1433F_BOVIN	sp|P68509|1433F_BOVIN	21	15	15	>sp|P68509|1433F_BOVIN 14-3-3 protein eta OS=Bos taurus OX=9913 GN=YWHAH PE=1 SV=2	1	21	15	15	21	20	20	20	21	19	21	20	21	20	13	14	20	20	20	18	15	15	15	14	15	13	15	14	15	14	9	10	14	14	14	13	15	15	15	14	15	13	15	14
sp|P68530|COX2_BOVIN	sp|P68530|COX2_BOVIN	6	6	6	>sp|P68530|COX2_BOVIN Cytochrome c oxidase subunit 2 OS=Bos taurus OX=9913 GN=MT-CO2 PE=1 SV=1	1	6	6	6	6	6	5	5	6	6	6	6	6	6	3	3	6	5	5	5	6	6	5	5	6	6	6	6	6	6	3	3	6	5	5	5	6	6	5	5	6	6	6	6
sp|P79103|RS4_BOVIN	sp|P79103|RS4_BOVIN	5	5	5	>sp|P79103|RS4_BOVIN 40S ribosomal protein S4 OS=Bos taurus OX=9913 GN=RPS4 PE=2 SV=3	1	5	5	5	4	4	5	5	5	5	5	5	5	5	3	2	5	4	4	5	4	4	5	5	5	5	5	5	5	5	3	2	5	4	4	5	4	4	5	5	5	5	5	5
sp|P79132|CAV1_BOVIN;sp|Q2KI43|CAV3_BOVIN	sp|P79132|CAV1_BOVIN	4;1	4;1	4;1	>sp|P79132|CAV1_BOVIN Caveolin-1 OS=Bos taurus OX=9913 GN=CAV1 PE=2 SV=1	2	4	4	4	3	3	1	1	2	2	2	2	3	3	4	4	3	3	3	4	3	3	1	1	2	2	2	2	3	3	4	4	3	3	3	4	3	3	1	1	2	2	2	2
sp|P79134|ANXA6_BOVIN	sp|P79134|ANXA6_BOVIN	43	43	43	>sp|P79134|ANXA6_BOVIN Annexin A6 OS=Bos taurus OX=9913 GN=ANXA6 PE=1 SV=2	1	43	43	43	39	40	40	41	39	41	38	37	37	41	28	24	37	36	34	37	39	40	40	41	39	41	38	37	37	41	28	24	37	36	34	37	39	40	40	41	39	41	38	37
sp|P79136|CAPZB_BOVIN	sp|P79136|CAPZB_BOVIN	12	12	12	>sp|P79136|CAPZB_BOVIN F-actin-capping protein subunit beta OS=Bos taurus OX=9913 GN=CAPZB PE=1 SV=1	1	12	12	12	10	10	10	10	11	11	11	10	10	10	6	6	11	11	9	10	10	10	10	10	11	11	11	10	10	10	6	6	11	11	9	10	10	10	10	10	11	11	11	10
sp|P79334|PYGM_BOVIN	sp|P79334|PYGM_BOVIN	46	36	36	>sp|P79334|PYGM_BOVIN Glycogen phosphorylase, muscle form OS=Bos taurus OX=9913 GN=PYGM PE=1 SV=3	1	46	36	36	39	40	37	38	40	40	41	42	44	43	28	25	44	40	41	41	30	32	30	30	32	32	33	34	35	35	21	18	35	31	31	33	30	32	30	30	32	32	33	34
sp|P80177|MIF_BOVIN	sp|P80177|MIF_BOVIN	4	4	4	>sp|P80177|MIF_BOVIN Macrophage migration inhibitory factor OS=Bos taurus OX=9913 GN=MIF PE=1 SV=6	1	4	4	4	3	3	4	4	4	4	3	3	4	3	3	3	3	4	3	3	3	3	4	4	4	4	3	3	4	3	3	3	3	4	3	3	3	3	4	4	4	4	3	3
sp|P80209|CATD_BOVIN	sp|P80209|CATD_BOVIN	15	15	15	>sp|P80209|CATD_BOVIN Cathepsin D OS=Bos taurus OX=9913 GN=CTSD PE=1 SV=2	1	15	15	15	13	13	15	15	14	15	13	12	15	15	9	9	14	14	15	15	13	13	15	15	14	15	13	12	15	15	9	9	14	14	15	15	13	13	15	15	14	15	13	12
sp|P80311|PPIB_BOVIN	sp|P80311|PPIB_BOVIN	8	8	8	>sp|P80311|PPIB_BOVIN Peptidyl-prolyl cis-trans isomerase B OS=Bos taurus OX=9913 GN=PPIB PE=1 SV=4	1	8	8	8	7	6	8	8	8	8	7	7	7	7	7	6	7	6	7	7	7	6	8	8	8	8	7	7	7	7	7	6	7	6	7	7	7	6	8	8	8	8	7	7
sp|P80724|BASP1_BOVIN	sp|P80724|BASP1_BOVIN	32	32	32	>sp|P80724|BASP1_BOVIN Brain acid soluble protein 1 OS=Bos taurus OX=9913 GN=BASP1 PE=1 SV=3	1	32	32	32	31	29	31	32	27	27	31	31	32	32	24	24	32	32	32	31	31	29	31	32	27	27	31	31	32	32	24	24	32	32	32	31	31	29	31	32	27	27	31	31
sp|P81125|SNAA_BOVIN	sp|P81125|SNAA_BOVIN	18	16	16	>sp|P81125|SNAA_BOVIN Alpha-soluble NSF attachment protein OS=Bos taurus OX=9913 GN=NAPA PE=1 SV=1	1	18	16	16	14	17	18	17	16	17	15	15	14	15	9	9	14	16	13	13	12	15	16	15	14	15	13	13	12	13	7	7	12	14	11	11	12	15	16	15	14	15	13	13
sp|P81126|SNAB_BOVIN	sp|P81126|SNAB_BOVIN	21	21	19	>sp|P81126|SNAB_BOVIN Beta-soluble NSF attachment protein OS=Bos taurus OX=9913 GN=NAPB PE=1 SV=1	1	21	21	19	18	21	20	20	20	21	20	17	19	19	10	10	20	20	19	16	18	21	20	20	20	21	20	17	19	19	10	10	20	20	19	16	16	19	18	18	18	19	18	15
sp|P81127|SNAG_BOVIN	sp|P81127|SNAG_BOVIN	9	9	9	>sp|P81127|SNAG_BOVIN Gamma-soluble NSF attachment protein OS=Bos taurus OX=9913 GN=NAPG PE=1 SV=3	1	9	9	9	5	7	9	7	6	6	8	7	8	8	1	1	8	7	7	5	5	7	9	7	6	6	8	7	8	8	1	1	8	7	7	5	5	7	9	7	6	6	8	7
sp|P81282|CSPG2_BOVIN	sp|P81282|CSPG2_BOVIN	21	21	21	>sp|P81282|CSPG2_BOVIN Versican core protein OS=Bos taurus OX=9913 GN=VCAN PE=1 SV=2	1	21	21	21	18	18	20	21	19	21	17	13	21	20	6	6	18	19	17	15	18	18	20	21	19	21	17	13	21	20	6	6	18	19	17	15	18	18	20	21	19	21	17	13
sp|P81287|ANXA5_BOVIN	sp|P81287|ANXA5_BOVIN	24	24	24	>sp|P81287|ANXA5_BOVIN Annexin A5 OS=Bos taurus OX=9913 GN=ANXA5 PE=1 SV=3	1	24	24	24	21	22	19	19	21	19	18	21	20	21	19	17	20	20	20	21	21	22	19	19	21	19	18	21	20	21	19	17	20	20	20	21	21	22	19	19	21	19	18	21
sp|P81623|ERP29_BOVIN	sp|P81623|ERP29_BOVIN	6	6	6	>sp|P81623|ERP29_BOVIN Endoplasmic reticulum resident protein 29 OS=Bos taurus OX=9913 GN=ERP29 PE=1 SV=2	1	6	6	6	5	6	5	5	6	4	6	6	6	6	4	4	6	5	6	5	5	6	5	5	6	4	6	6	6	6	4	4	6	5	6	5	5	6	5	5	6	4	6	6
sp|P81948|TBA4A_BOVIN	sp|P81948|TBA4A_BOVIN	42	42	13	>sp|P81948|TBA4A_BOVIN Tubulin alpha-4A chain OS=Bos taurus OX=9913 GN=TUBA4A PE=1 SV=2	1	42	42	13	39	39	36	38	37	39	39	39	41	42	29	30	39	40	39	38	39	39	36	38	37	39	39	39	41	42	29	30	39	40	39	38	11	11	10	11	10	11	11	11
sp|P83939|SCRN1_BOVIN	sp|P83939|SCRN1_BOVIN	25	25	25	>sp|P83939|SCRN1_BOVIN Secernin-1 OS=Bos taurus OX=9913 GN=SCRN1 PE=1 SV=2	1	25	25	25	23	22	21	22	22	24	21	22	24	24	15	16	21	23	22	23	23	22	21	22	22	24	21	22	24	24	15	16	21	23	22	23	23	22	21	22	22	24	21	22
sp|P84088|CPLX2_BOVIN	sp|P84088|CPLX2_BOVIN	8	8	7	>sp|P84088|CPLX2_BOVIN Complexin-2 OS=Bos taurus OX=9913 GN=CPLX2 PE=1 SV=1	1	8	8	7	7	8	7	7	7	8	8	7	7	7	5	4	7	7	8	6	7	8	7	7	7	8	8	7	7	7	5	4	7	7	8	6	7	7	6	6	7	7	7	7
sp|Q00361|ATP5I_BOVIN	sp|Q00361|ATP5I_BOVIN	5	5	5	>sp|Q00361|ATP5I_BOVIN ATP synthase subunit e, mitochondrial OS=Bos taurus OX=9913 GN=ATP5ME PE=1 SV=2	1	5	5	5	5	5	5	5	5	5	5	5	5	5	4	3	5	5	4	5	5	5	5	5	5	5	5	5	5	5	4	3	5	5	4	5	5	5	5	5	5	5	5	5
sp|Q01321|NDUA4_BOVIN	sp|Q01321|NDUA4_BOVIN	7	7	7	>sp|Q01321|NDUA4_BOVIN Cytochrome c oxidase subunit NDUFA4 OS=Bos taurus OX=9913 GN=NDUFA4 PE=1 SV=1	1	7	7	7	7	7	7	6	7	7	7	7	7	7	4	4	7	7	6	6	7	7	7	6	7	7	7	7	7	7	4	4	7	7	6	6	7	7	7	6	7	7	7	7
sp|Q02368|NDUB7_BOVIN	sp|Q02368|NDUB7_BOVIN	5	5	5	>sp|Q02368|NDUB7_BOVIN NADH dehydrogenase [ubiquinone] 1 beta subcomplex subunit 7 OS=Bos taurus OX=9913 GN=NDUFB7 PE=1 SV=2	1	5	5	5	4	4	5	4	4	4	5	3	4	5	3	1	4	4	5	4	4	4	5	4	4	4	5	3	4	5	3	1	4	4	5	4	4	4	5	4	4	4	5	3
sp|Q02369|NDUB9_BOVIN	sp|Q02369|NDUB9_BOVIN	8	8	8	>sp|Q02369|NDUB9_BOVIN NADH dehydrogenase [ubiquinone] 1 beta subcomplex subunit 9 OS=Bos taurus OX=9913 GN=NDUFB9 PE=1 SV=2	1	8	8	8	7	8	7	8	7	7	8	8	8	8	4	4	8	6	6	7	7	8	7	8	7	7	8	8	8	8	4	4	8	6	6	7	7	8	7	8	7	7	8	8
sp|Q02370|NDUA2_BOVIN	sp|Q02370|NDUA2_BOVIN	5	5	5	>sp|Q02370|NDUA2_BOVIN NADH dehydrogenase [ubiquinone] 1 alpha subcomplex subunit 2 OS=Bos taurus OX=9913 GN=NDUFA2 PE=1 SV=2	1	5	5	5	4	4	5	5	5	4	5	4	4	4	2	2	4	4	4	4	4	4	5	5	5	4	5	4	4	4	2	2	4	4	4	4	4	4	5	5	5	4	5	4
sp|Q02372|NDUB8_BOVIN	sp|Q02372|NDUB8_BOVIN	6	6	6	>sp|Q02372|NDUB8_BOVIN NADH dehydrogenase [ubiquinone] 1 beta subcomplex subunit 8, mitochondrial OS=Bos taurus OX=9913 GN=NDUFB8 PE=1 SV=1	1	6	6	6	5	5	6	4	5	6	5	5	6	5	1	1	5	5	6	6	5	5	6	4	5	6	5	5	6	5	1	1	5	5	6	6	5	5	6	4	5	6	5	5
sp|Q02373|NDUBA_BOVIN	sp|Q02373|NDUBA_BOVIN	11	11	11	>sp|Q02373|NDUBA_BOVIN NADH dehydrogenase [ubiquinone] 1 beta subcomplex subunit 10 OS=Bos taurus OX=9913 GN=NDUFB10 PE=1 SV=2	1	11	11	11	11	11	11	11	11	11	11	11	11	10	6	7	9	10	9	11	11	11	11	11	11	11	11	11	11	10	6	7	9	10	9	11	11	11	11	11	11	11	11	11
sp|Q02375|NDUS4_BOVIN	sp|Q02375|NDUS4_BOVIN	8	8	8	>sp|Q02375|NDUS4_BOVIN NADH dehydrogenase [ubiquinone] iron-sulfur protein 4, mitochondrial OS=Bos taurus OX=9913 GN=NDUFS4 PE=1 SV=1	1	8	8	8	7	5	7	7	7	6	7	7	7	6	5	4	5	6	7	7	7	5	7	7	7	6	7	7	7	6	5	4	5	6	7	7	7	5	7	7	7	6	7	7
sp|Q02379|NDUS5_BOVIN	sp|Q02379|NDUS5_BOVIN	6	6	6	>sp|Q02379|NDUS5_BOVIN NADH dehydrogenase [ubiquinone] iron-sulfur protein 5 OS=Bos taurus OX=9913 GN=NDUFS5 PE=1 SV=2	1	6	6	6	4	6	5	5	4	4	5	5	6	4	2	2	5	3	6	4	4	6	5	5	4	4	5	5	6	4	2	2	5	3	6	4	4	6	5	5	4	4	5	5
sp|Q02399|CDK5_BOVIN	sp|Q02399|CDK5_BOVIN	7	7	6	>sp|Q02399|CDK5_BOVIN Cyclin-dependent-like kinase 5 OS=Bos taurus OX=9913 GN=CDK5 PE=1 SV=2	1	7	7	6	6	7	6	6	7	7	5	5	6	6	4	2	7	6	6	7	6	7	6	6	7	7	5	5	6	6	4	2	7	6	6	7	5	6	5	5	6	6	4	4
sp|Q02827|NDUC2_BOVIN	sp|Q02827|NDUC2_BOVIN	5	5	5	>sp|Q02827|NDUC2_BOVIN NADH dehydrogenase [ubiquinone] 1 subunit C2 OS=Bos taurus OX=9913 GN=NDUFC2 PE=1 SV=1	1	5	5	5	5	5	4	4	5	5	4	5	4	4	2	2	5	4	4	4	5	5	4	4	5	5	4	5	4	4	2	2	5	4	4	4	5	5	4	4	5	5	4	5
sp|Q04173|GDS1_BOVIN	sp|Q04173|GDS1_BOVIN	15	15	15	>sp|Q04173|GDS1_BOVIN Rap1 GTPase-GDP dissociation stimulator 1 OS=Bos taurus OX=9913 GN=RAP1GDS1 PE=1 SV=1	1	15	15	15	11	14	8	14	13	13	13	12	14	14	3	2	11	13	8	12	11	14	8	14	13	13	13	12	14	14	3	2	11	13	8	12	11	14	8	14	13	13	13	12
sp|Q04467|IDHP_BOVIN	sp|Q04467|IDHP_BOVIN	22	22	21	>sp|Q04467|IDHP_BOVIN Isocitrate dehydrogenase [NADP], mitochondrial OS=Bos taurus OX=9913 GN=IDH2 PE=1 SV=2	1	22	22	21	20	20	22	21	22	22	22	22	22	21	13	15	21	20	20	20	20	20	22	21	22	22	22	22	22	21	13	15	21	20	20	20	19	19	21	20	21	21	21	21
sp|Q05752|NDUA7_BOVIN	sp|Q05752|NDUA7_BOVIN	5	5	5	>sp|Q05752|NDUA7_BOVIN NADH dehydrogenase [ubiquinone] 1 alpha subcomplex subunit 7 OS=Bos taurus OX=9913 GN=NDUFA7 PE=1 SV=2	1	5	5	5	5	5	5	5	5	5	5	5	5	5	4	3	5	5	5	5	5	5	5	5	5	5	5	5	5	5	4	3	5	5	5	5	5	5	5	5	5	5	5	5
sp|Q05B89|NIF3L_BOVIN	sp|Q05B89|NIF3L_BOVIN	4	4	4	>sp|Q05B89|NIF3L_BOVIN NIF3-like protein 1 OS=Bos taurus OX=9913 GN=NIF3L1 PE=2 SV=1	1	4	4	4	3	3	4	2	4	4	4	4	4	4	3	3	4	4	4	4	3	3	4	2	4	4	4	4	4	4	3	3	4	4	4	4	3	3	4	2	4	4	4	4
sp|Q06846|RP3A_BOVIN	sp|Q06846|RP3A_BOVIN	21	21	21	>sp|Q06846|RP3A_BOVIN Rabphilin-3A OS=Bos taurus OX=9913 GN=RPH3A PE=1 SV=1	1	21	21	21	19	19	19	17	20	19	20	21	20	21	11	5	16	18	15	19	19	19	19	17	20	19	20	21	20	21	11	5	16	18	15	19	19	19	19	17	20	19	20	21
sp|Q07130|UGPA_BOVIN	sp|Q07130|UGPA_BOVIN	17	17	17	>sp|Q07130|UGPA_BOVIN UTP--glucose-1-phosphate uridylyltransferase OS=Bos taurus OX=9913 GN=UGP2 PE=1 SV=2	1	17	17	17	14	13	16	16	16	14	13	14	15	16	12	12	13	13	12	13	14	13	16	16	16	14	13	14	15	16	12	12	13	13	12	13	14	13	16	16	16	14	13	14
sp|Q07536|MMSA_BOVIN	sp|Q07536|MMSA_BOVIN	8	8	8	>sp|Q07536|MMSA_BOVIN Methylmalonate-semialdehyde dehydrogenase [acylating], mitochondrial OS=Bos taurus OX=9913 GN=ALDH6A1 PE=1 SV=1	1	8	8	8	7	6	7	7	7	7	7	7	7	7	4	4	5	6	6	6	7	6	7	7	7	7	7	7	7	7	4	4	5	6	6	6	7	6	7	7	7	7	7	7
sp|Q08DA1|AT1A1_BOVIN	sp|Q08DA1|AT1A1_BOVIN	68	68	45	>sp|Q08DA1|AT1A1_BOVIN Sodium/potassium-transporting ATPase subunit alpha-1 OS=Bos taurus OX=9913 GN=ATP1A1 PE=1 SV=1	1	68	68	45	65	64	62	65	62	65	64	63	65	64	47	50	61	60	63	56	65	64	62	65	62	65	64	63	65	64	47	50	61	60	63	56	42	42	39	42	39	42	42	40
sp|Q08DF4|DYN1_BOVIN	sp|Q08DF4|DYN1_BOVIN	63	63	53	>sp|Q08DF4|DYN1_BOVIN Dynamin-1 OS=Bos taurus OX=9913 GN=DNM1 PE=2 SV=1	1	63	63	53	55	56	56	56	59	60	57	56	60	58	32	32	56	55	56	54	55	56	56	56	59	60	57	56	60	58	32	32	56	55	56	54	46	47	46	46	50	50	48	46
sp|Q08DH7|AINX_BOVIN	sp|Q08DH7|AINX_BOVIN	53	47	47	>sp|Q08DH7|AINX_BOVIN Alpha-internexin OS=Bos taurus OX=9913 GN=INA PE=2 SV=1	1	53	47	47	47	47	51	51	47	46	47	45	44	45	32	28	46	43	38	36	41	41	46	45	41	40	41	39	38	39	27	23	40	37	32	30	41	41	46	45	41	40	41	39
sp|Q08DI5|RAP2C_BOVIN	sp|Q08DI5|RAP2C_BOVIN	5	5	5	>sp|Q08DI5|RAP2C_BOVIN Ras-related protein Rap-2c OS=Bos taurus OX=9913 GN=RAP2C PE=2 SV=1	1	5	5	5	5	5	4	3	5	5	5	4	5	4	1	1	4	4	5	3	5	5	4	3	5	5	5	4	5	4	1	1	4	4	5	3	5	5	4	3	5	5	5	4
sp|Q08DK4|GHC1_BOVIN	sp|Q08DK4|GHC1_BOVIN	15	15	15	>sp|Q08DK4|GHC1_BOVIN Mitochondrial glutamate carrier 1 OS=Bos taurus OX=9913 GN=SLC25A22 PE=2 SV=1	1	15	15	15	13	11	13	13	13	13	13	13	13	12	6	7	12	13	11	11	13	11	13	13	13	13	13	13	13	12	6	7	12	13	11	11	13	11	13	13	13	13	13	13
sp|Q08DK5|SHLB2_BOVIN	sp|Q08DK5|SHLB2_BOVIN	17	17	16	>sp|Q08DK5|SHLB2_BOVIN Endophilin-B2 OS=Bos taurus OX=9913 GN=SH3GLB2 PE=2 SV=1	1	17	17	16	15	14	15	14	16	14	14	13	12	14	9	8	16	16	14	13	15	14	15	14	16	14	14	13	12	14	9	8	16	16	14	13	14	13	14	13	15	13	13	12
sp|Q08DM1|DEMA_BOVIN	sp|Q08DM1|DEMA_BOVIN	8	8	8	>sp|Q08DM1|DEMA_BOVIN Dematin OS=Bos taurus OX=9913 GN=DMTN PE=2 SV=1	1	8	8	8	6	7	6	6	6	5	7	8	6	6	6	6	7	6	7	6	6	7	6	6	6	5	7	8	6	6	6	6	7	6	7	6	6	7	6	6	6	5	7	8
sp|Q08DM7|SEPT3_BOVIN	sp|Q08DM7|SEPT3_BOVIN	13	13	13	>sp|Q08DM7|SEPT3_BOVIN Neuronal-specific septin-3 OS=Bos taurus OX=9913 GN=SEPTIN3 PE=2 SV=3	1	13	13	13	12	12	9	10	9	11	10	12	12	12	8	6	13	12	12	12	12	12	9	10	9	11	10	12	12	12	8	6	13	12	12	12	12	12	9	10	9	11	10	12
sp|Q08DN8|FLOT1_BOVIN	sp|Q08DN8|FLOT1_BOVIN	8	8	8	>sp|Q08DN8|FLOT1_BOVIN Flotillin-1 OS=Bos taurus OX=9913 GN=FLOT1 PE=2 SV=1	1	8	8	8	5	7	5	5	8	7	5	4	7	7	5	4	6	7	6	7	5	7	5	5	8	7	5	4	7	7	5	4	6	7	6	7	5	7	5	5	8	7	5	4
sp|Q08DP0|PGM1_BOVIN	sp|Q08DP0|PGM1_BOVIN	30	30	30	>sp|Q08DP0|PGM1_BOVIN Phosphoglucomutase-1 OS=Bos taurus OX=9913 GN=PGM1 PE=2 SV=1	1	30	30	30	29	27	25	23	29	30	28	27	28	29	23	23	27	26	27	28	29	27	25	23	29	30	28	27	28	29	23	23	27	26	27	28	29	27	25	23	29	30	28	27
sp|Q08DU9|HP1B3_BOVIN	sp|Q08DU9|HP1B3_BOVIN	5	5	5	>sp|Q08DU9|HP1B3_BOVIN Heterochromatin protein 1-binding protein 3 OS=Bos taurus OX=9913 GN=HP1BP3 PE=2 SV=1	1	5	5	5	1	2	1	2	2	3	3	2	1	1	3	2	1	2	3	2	1	2	1	2	2	3	3	2	1	1	3	2	1	2	3	2	1	2	1	2	2	3	3	2
sp|Q08E20|ESTD_BOVIN	sp|Q08E20|ESTD_BOVIN	10	10	10	>sp|Q08E20|ESTD_BOVIN S-formylglutathione hydrolase OS=Bos taurus OX=9913 GN=ESD PE=2 SV=1	1	10	10	10	8	8	7	8	8	8	10	9	8	9	4	4	8	7	10	9	8	8	7	8	8	8	10	9	8	9	4	4	8	7	10	9	8	8	7	8	8	8	10	9
sp|Q08E52|PAK1_BOVIN	sp|Q08E52|PAK1_BOVIN	14	14	14	>sp|Q08E52|PAK1_BOVIN Serine/threonine-protein kinase PAK 1 OS=Bos taurus OX=9913 GN=PAK1 PE=1 SV=1	1	14	14	14	12	11	11	12	13	13	13	14	12	13	3	2	13	12	14	13	12	11	11	12	13	13	13	14	12	13	3	2	13	12	14	13	12	11	11	12	13	13	13	14
sp|Q09139|FABP7_BOVIN	sp|Q09139|FABP7_BOVIN	5	5	5	>sp|Q09139|FABP7_BOVIN Fatty acid-binding protein, brain OS=Bos taurus OX=9913 GN=FABP7 PE=1 SV=2	1	5	5	5	5	4	5	5	5	5	5	5	5	5	4	4	5	5	5	5	5	4	5	5	5	5	5	5	5	5	4	4	5	5	5	5	5	4	5	5	5	5	5	5
sp|Q09430|PROF2_BOVIN	sp|Q09430|PROF2_BOVIN	8	8	8	>sp|Q09430|PROF2_BOVIN Profilin-2 OS=Bos taurus OX=9913 GN=PFN2 PE=1 SV=2	1	8	8	8	5	5	6	6	7	5	5	5	6	6	2	3	6	6	5	6	5	5	6	6	7	5	5	5	6	6	2	3	6	6	5	6	5	5	6	6	7	5	5	5
sp|Q0II59|PDXK_BOVIN	sp|Q0II59|PDXK_BOVIN	15	15	15	>sp|Q0II59|PDXK_BOVIN Pyridoxal kinase OS=Bos taurus OX=9913 GN=PDXK PE=2 SV=1	1	15	15	15	14	15	14	15	15	14	13	14	14	15	11	12	15	14	14	14	14	15	14	15	15	14	13	14	14	15	11	12	15	14	14	14	14	15	14	15	15	14	13	14
sp|Q0IIF7|UBP14_BOVIN	sp|Q0IIF7|UBP14_BOVIN	9	9	9	>sp|Q0IIF7|UBP14_BOVIN Ubiquitin carboxyl-terminal hydrolase 14 OS=Bos taurus OX=9913 GN=USP14 PE=2 SV=3	1	9	9	9	7	7	7	7	7	8	7	7	8	7	4	4	7	8	9	9	7	7	7	7	7	8	7	7	8	7	4	4	7	8	9	9	7	7	7	7	7	8	7	7
sp|Q0IIG5|PFKAM_BOVIN	sp|Q0IIG5|PFKAM_BOVIN	36	36	33	>sp|Q0IIG5|PFKAM_BOVIN ATP-dependent 6-phosphofructokinase, muscle type OS=Bos taurus OX=9913 GN=PFKM PE=2 SV=1	1	36	36	33	32	32	33	33	33	34	33	32	35	34	16	16	34	33	30	28	32	32	33	33	33	34	33	32	35	34	16	16	34	33	30	28	29	29	30	30	30	31	30	30
sp|Q0IIG7|RAB5A_BOVIN	sp|Q0IIG7|RAB5A_BOVIN	7	7	5	>sp|Q0IIG7|RAB5A_BOVIN Ras-related protein Rab-5A OS=Bos taurus OX=9913 GN=RAB5A PE=1 SV=1	1	7	7	5	6	5	6	7	7	7	5	5	7	6	2	2	6	5	3	4	6	5	6	7	7	7	5	5	7	6	2	2	6	5	3	4	4	3	4	5	5	5	3	3
sp|Q0IIG8|RAB18_BOVIN	sp|Q0IIG8|RAB18_BOVIN	7	7	7	>sp|Q0IIG8|RAB18_BOVIN Ras-related protein Rab-18 OS=Bos taurus OX=9913 GN=RAB18 PE=2 SV=1	1	7	7	7	5	5	7	7	6	6	5	4	7	6	1	1	7	6	5	5	5	5	7	7	6	6	5	4	7	6	1	1	7	6	5	5	5	5	7	7	6	6	5	4
sp|Q0IIJ3|WASF1_BOVIN	sp|Q0IIJ3|WASF1_BOVIN	10	10	10	>sp|Q0IIJ3|WASF1_BOVIN Wiskott-Aldrich syndrome protein family member 1 OS=Bos taurus OX=9913 GN=WASF1 PE=2 SV=1	1	10	10	10	6	5	6	6	9	6	5	5	7	8	5	2	6	6	4	7	6	5	6	6	9	6	5	5	7	8	5	2	6	6	4	7	6	5	6	6	9	6	5	5
sp|Q0IIK5|DDX1_BOVIN	sp|Q0IIK5|DDX1_BOVIN	7	7	7	>sp|Q0IIK5|DDX1_BOVIN ATP-dependent RNA helicase DDX1 OS=Bos taurus OX=9913 GN=DDX1 PE=2 SV=1	1	7	7	7	6	7	6	7	6	7	7	6	7	7	3	4	7	5	7	6	6	7	6	7	6	7	7	6	7	7	3	4	7	5	7	6	6	7	6	7	6	7	7	6
sp|Q0IIL7|CPLX1_BOVIN	sp|Q0IIL7|CPLX1_BOVIN	6	5	5	>sp|Q0IIL7|CPLX1_BOVIN Complexin-1 OS=Bos taurus OX=9913 GN=CPLX1 PE=2 SV=1	1	6	5	5	4	4	4	4	4	4	4	3	2	4	1	1	1	2	3	1	4	3	3	3	4	3	3	3	2	4	1	1	1	2	2	1	4	3	3	3	4	3	3	3
sp|Q0IIM3|HS105_BOVIN	sp|Q0IIM3|HS105_BOVIN	38	38	38	>sp|Q0IIM3|HS105_BOVIN Heat shock protein 105 kDa OS=Bos taurus OX=9913 GN=HSPH1 PE=2 SV=1	1	38	38	38	38	35	35	33	36	34	35	34	35	35	15	15	35	34	34	32	38	35	35	33	36	34	35	34	35	35	15	15	35	34	34	32	38	35	35	33	36	34	35	34
sp|Q0P5K3|UBE2N_BOVIN	sp|Q0P5K3|UBE2N_BOVIN	10	10	10	>sp|Q0P5K3|UBE2N_BOVIN Ubiquitin-conjugating enzyme E2 N OS=Bos taurus OX=9913 GN=UBE2N PE=2 SV=1	1	10	10	10	9	9	7	6	7	8	9	9	10	7	8	7	9	9	8	8	9	9	7	6	7	8	9	9	10	7	8	7	9	9	8	8	9	9	7	6	7	8	9	9
sp|Q0V7N0|VAMP1_BOVIN	sp|Q0V7N0|VAMP1_BOVIN	7	4	4	>sp|Q0V7N0|VAMP1_BOVIN Vesicle-associated membrane protein 1 OS=Bos taurus OX=9913 GN=VAMP1 PE=3 SV=2	1	7	4	4	7	6	7	6	7	7	7	7	7	6	4	3	7	6	6	4	4	3	4	4	4	4	4	4	4	3	2	1	4	3	3	2	4	3	4	4	4	4	4	4
sp|Q0V8B6|TPP1_BOVIN	sp|Q0V8B6|TPP1_BOVIN	5	5	5	>sp|Q0V8B6|TPP1_BOVIN Tripeptidyl-peptidase 1 OS=Bos taurus OX=9913 GN=TPP1 PE=2 SV=1	1	5	5	5	4	4	4	4	4	3	3	4	4	4	4	4	4	4	5	5	4	4	4	4	4	3	3	4	4	4	4	4	4	4	5	5	4	4	4	4	4	3	3	4
sp|Q0V8S0|HGS_BOVIN	sp|Q0V8S0|HGS_BOVIN	4	4	4	>sp|Q0V8S0|HGS_BOVIN Hepatocyte growth factor-regulated tyrosine kinase substrate OS=Bos taurus OX=9913 GN=HGS PE=2 SV=1	1	4	4	4	3	2	4	3	4	4	4	3	4	4	1	1	3	3	2	1	3	2	4	3	4	4	4	3	4	4	1	1	3	3	2	1	3	2	4	3	4	4	4	3
sp|Q0VC68|SEPT5_BOVIN	sp|Q0VC68|SEPT5_BOVIN	24	24	23	>sp|Q0VC68|SEPT5_BOVIN Septin-5 OS=Bos taurus OX=9913 GN=SEPTIN5 PE=2 SV=1	1	24	24	23	18	19	21	22	21	22	20	20	22	22	12	12	22	20	19	21	18	19	21	22	21	22	20	20	22	22	12	12	22	20	19	21	18	19	21	22	21	21	20	20
sp|Q0VCA3|LETM1_BOVIN	sp|Q0VCA3|LETM1_BOVIN	22	22	22	>sp|Q0VCA3|LETM1_BOVIN Mitochondrial proton/calcium exchanger protein OS=Bos taurus OX=9913 GN=LETM1 PE=2 SV=1	1	22	22	22	22	20	20	18	22	21	22	21	21	21	12	11	21	19	19	20	22	20	20	18	22	21	22	21	21	21	12	11	21	19	19	20	22	20	20	18	22	21	22	21
sp|Q0VCG3|PRVA_BOVIN	sp|Q0VCG3|PRVA_BOVIN	5	5	5	>sp|Q0VCG3|PRVA_BOVIN Parvalbumin alpha OS=Bos taurus OX=9913 GN=PVALB PE=3 SV=3	1	5	5	5	5	5	5	5	5	5	5	5	5	5	1	2	0	0	2	1	5	5	5	5	5	5	5	5	5	5	1	2	0	0	2	1	5	5	5	5	5	5	5	5
sp|Q0VCK0|PUR9_BOVIN	sp|Q0VCK0|PUR9_BOVIN	22	22	22	>sp|Q0VCK0|PUR9_BOVIN Bifunctional purine biosynthesis protein ATIC OS=Bos taurus OX=9913 GN=ATIC PE=2 SV=1	1	22	22	22	19	14	20	20	20	21	19	22	19	19	15	16	20	19	19	20	19	14	20	20	20	21	19	22	19	19	15	16	20	19	19	20	19	14	20	20	20	21	19	22
sp|Q0VCK5|AP2A2_BOVIN	sp|Q0VCK5|AP2A2_BOVIN	32	32	32	>sp|Q0VCK5|AP2A2_BOVIN AP-2 complex subunit alpha-2 OS=Bos taurus OX=9913 GN=AP2A2 PE=1 SV=1	1	32	32	32	28	29	29	29	29	31	30	29	30	30	15	19	29	31	27	28	28	29	29	29	29	31	30	29	30	30	15	19	29	31	27	28	28	29	29	29	29	31	30	29
sp|Q0VCP1|KAD4_BOVIN	sp|Q0VCP1|KAD4_BOVIN	5	5	5	>sp|Q0VCP1|KAD4_BOVIN Adenylate kinase 4, mitochondrial OS=Bos taurus OX=9913 GN=AK4 PE=2 SV=1	1	5	5	5	3	3	4	4	4	3	4	5	5	4	3	3	5	4	5	5	3	3	4	4	4	3	4	5	5	4	3	3	5	4	5	5	3	3	4	4	4	3	4	5
sp|Q0VCP3|OLFL3_BOVIN	sp|Q0VCP3|OLFL3_BOVIN	12	12	12	>sp|Q0VCP3|OLFL3_BOVIN Olfactomedin-like protein 3 OS=Bos taurus OX=9913 GN=OLFML3 PE=2 SV=1	1	12	12	12	2	3	0	0	0	0	3	3	3	1	12	12	0	1	4	7	2	3	0	0	0	0	3	3	3	1	12	12	0	1	4	7	2	3	0	0	0	0	3	3
sp|Q0VCP4|SEPT8_BOVIN	sp|Q0VCP4|SEPT8_BOVIN	21	16	16	>sp|Q0VCP4|SEPT8_BOVIN Septin-8 OS=Bos taurus OX=9913 GN=SEPTIN8 PE=2 SV=3	1	21	16	16	16	16	20	20	19	18	17	17	16	18	12	12	16	15	16	14	12	12	16	16	16	14	13	13	12	14	8	8	12	12	12	10	12	12	16	16	16	14	13	13
sp|Q0VCV6|VATG2_BOVIN	sp|Q0VCV6|VATG2_BOVIN	8	8	8	>sp|Q0VCV6|VATG2_BOVIN V-type proton ATPase subunit G 2 OS=Bos taurus OX=9913 GN=ATP6V1G2 PE=1 SV=1	1	8	8	8	8	8	8	6	8	8	8	8	7	8	7	7	8	8	7	7	8	8	8	6	8	8	8	8	7	8	7	7	8	8	7	7	8	8	8	6	8	8	8	8
sp|Q0VCX2|BIP_BOVIN	sp|Q0VCX2|BIP_BOVIN	32	30	30	>sp|Q0VCX2|BIP_BOVIN Endoplasmic reticulum chaperone BiP OS=Bos taurus OX=9913 GN=HSPA5 PE=2 SV=1	1	32	30	30	23	25	23	25	26	23	26	25	26	27	21	25	26	26	25	27	21	23	21	23	24	21	24	23	24	25	19	23	24	24	23	25	21	23	21	23	24	21	24	23
sp|Q0VCX4|CTNB1_BOVIN	sp|Q0VCX4|CTNB1_BOVIN	12	12	10	>sp|Q0VCX4|CTNB1_BOVIN Catenin beta-1 OS=Bos taurus OX=9913 GN=CTNNB1 PE=1 SV=1	1	12	12	10	10	9	9	9	10	8	11	11	11	10	4	6	9	9	10	9	10	9	9	9	10	8	11	11	11	10	4	6	9	9	10	9	9	8	8	8	8	7	10	10
sp|Q0VCY0|AT2A1_BOVIN	sp|Q0VCY0|AT2A1_BOVIN	7	7	7	>sp|Q0VCY0|AT2A1_BOVIN Sarcoplasmic/endoplasmic reticulum calcium ATPase 1 OS=Bos taurus OX=9913 GN=ATP2A1 PE=1 SV=1	1	7	7	7	7	6	6	6	7	7	6	6	7	7	4	4	7	7	7	7	7	6	6	6	7	7	6	6	7	7	4	4	7	7	7	7	7	6	6	6	7	7	6	6
sp|Q0VCY1|VAPA_BOVIN	sp|Q0VCY1|VAPA_BOVIN	10	9	9	>sp|Q0VCY1|VAPA_BOVIN Vesicle-associated membrane protein-associated protein A OS=Bos taurus OX=9913 GN=VAPA PE=2 SV=1	1	10	9	9	10	10	10	8	10	10	10	10	10	10	7	9	8	9	9	9	9	9	9	7	9	9	9	9	9	9	6	8	7	8	8	8	9	9	9	7	9	9	9	9
sp|Q0VCY7|SRSF1_BOVIN	sp|Q0VCY7|SRSF1_BOVIN	4	4	4	>sp|Q0VCY7|SRSF1_BOVIN Serine/arginine-rich splicing factor 1 OS=Bos taurus OX=9913 GN=SRSF1 PE=2 SV=1	1	4	4	4	3	4	4	4	4	4	4	3	3	4	2	3	3	4	3	4	3	4	4	4	4	4	4	3	3	4	2	3	3	4	3	4	3	4	4	4	4	4	4	3
sp|Q0VD07|GPM6A_BOVIN	sp|Q0VD07|GPM6A_BOVIN	9	9	9	>sp|Q0VD07|GPM6A_BOVIN Neuronal membrane glycoprotein M6-a OS=Bos taurus OX=9913 GN=GPM6A PE=2 SV=1	1	9	9	9	8	9	8	8	9	9	8	8	9	9	8	8	9	9	9	9	8	9	8	8	9	9	8	8	9	9	8	8	9	9	9	9	8	9	8	8	9	9	8	8
sp|Q0VD18|LHPP_BOVIN	sp|Q0VD18|LHPP_BOVIN	7	7	7	>sp|Q0VD18|LHPP_BOVIN Phospholysine phosphohistidine inorganic pyrophosphate phosphatase OS=Bos taurus OX=9913 GN=LHPP PE=1 SV=1	1	7	7	7	6	6	5	6	6	6	6	6	7	7	5	4	6	6	6	5	6	6	5	6	6	6	6	6	7	7	5	4	6	6	6	5	6	6	5	6	6	6	6	6
sp|Q0VD34|PHYIP_BOVIN	sp|Q0VD34|PHYIP_BOVIN	10	8	8	>sp|Q0VD34|PHYIP_BOVIN Phytanoyl-CoA hydroxylase-interacting protein OS=Bos taurus OX=9913 GN=PHYHIP PE=2 SV=1	1	10	8	8	7	7	7	9	6	8	8	7	9	8	5	4	8	7	9	9	5	5	5	7	4	6	6	5	7	6	4	3	6	5	7	7	5	5	5	7	4	6	6	5
sp|Q0VFX8|CRIP2_BOVIN	sp|Q0VFX8|CRIP2_BOVIN	4	4	4	>sp|Q0VFX8|CRIP2_BOVIN Cysteine-rich protein 2 OS=Bos taurus OX=9913 GN=CRIP2 PE=2 SV=1	1	4	4	4	3	4	3	3	3	3	3	3	4	4	3	2	4	4	4	4	3	4	3	3	3	3	3	3	4	4	3	2	4	4	4	4	3	4	3	3	3	3	3	3
sp|Q148C4|PCP4_BOVIN	sp|Q148C4|PCP4_BOVIN	4	4	4	>sp|Q148C4|PCP4_BOVIN Calmodulin regulator protein PCP4 OS=Bos taurus OX=9913 GN=PCP4 PE=3 SV=1	1	4	4	4	2	3	3	2	2	2	3	3	4	4	1	1	4	4	4	4	2	3	3	2	2	2	3	3	4	4	1	1	4	4	4	4	2	3	3	2	2	2	3	3
sp|Q148C9|HEBP1_BOVIN	sp|Q148C9|HEBP1_BOVIN	10	10	10	>sp|Q148C9|HEBP1_BOVIN Heme-binding protein 1 OS=Bos taurus OX=9913 GN=HEBP1 PE=2 SV=1	1	10	10	10	8	8	8	8	8	8	9	10	10	9	9	8	10	9	10	10	8	8	8	8	8	8	9	10	10	9	9	8	10	9	10	10	8	8	8	8	8	8	9	10
sp|Q148D5|SUCB1_BOVIN	sp|Q148D5|SUCB1_BOVIN	18	18	18	>sp|Q148D5|SUCB1_BOVIN Succinate--CoA ligase [ADP-forming] subunit beta, mitochondrial OS=Bos taurus OX=9913 GN=SUCLA2 PE=2 SV=1	1	18	18	18	15	16	13	14	17	17	16	15	17	17	10	11	15	16	16	16	15	16	13	14	17	17	16	15	17	17	10	11	15	16	16	16	15	16	13	14	17	17	16	15
sp|Q148F1|COF2_BOVIN	sp|Q148F1|COF2_BOVIN	12	9	9	>sp|Q148F1|COF2_BOVIN Cofilin-2 OS=Bos taurus OX=9913 GN=CFL2 PE=2 SV=1	1	12	9	9	11	9	10	10	9	10	8	9	9	9	6	5	9	9	9	10	8	7	7	7	7	8	6	7	7	7	4	3	7	7	7	8	8	7	7	7	7	8	6	7
sp|Q148G5|PROD_BOVIN	sp|Q148G5|PROD_BOVIN	4	4	4	>sp|Q148G5|PROD_BOVIN Proline dehydrogenase 1, mitochondrial OS=Bos taurus OX=9913 GN=PRODH PE=2 SV=1	1	4	4	4	3	3	1	2	3	3	3	3	2	3	1	3	4	1	2	3	3	3	1	2	3	3	3	3	2	3	1	3	4	1	2	3	3	3	1	2	3	3	3	3
sp|Q148J6|ARPC4_BOVIN	sp|Q148J6|ARPC4_BOVIN	7	7	7	>sp|Q148J6|ARPC4_BOVIN Actin-related protein 2/3 complex subunit 4 OS=Bos taurus OX=9913 GN=ARPC4 PE=1 SV=3	1	7	7	7	5	4	3	5	4	4	7	5	6	7	2	2	3	3	4	3	5	4	3	5	4	4	7	5	6	7	2	2	3	3	4	3	5	4	3	5	4	4	7	5
sp|Q148N0|ODO1_BOVIN	sp|Q148N0|ODO1_BOVIN	29	29	29	>sp|Q148N0|ODO1_BOVIN 2-oxoglutarate dehydrogenase, mitochondrial OS=Bos taurus OX=9913 GN=OGDH PE=2 SV=1	1	29	29	29	26	25	26	23	26	28	26	26	28	27	14	11	25	25	26	25	26	25	26	23	26	28	26	26	28	27	14	11	25	25	26	25	26	25	26	23	26	28	26	26
sp|Q17QC0|PGRC1_BOVIN	sp|Q17QC0|PGRC1_BOVIN	8	8	8	>sp|Q17QC0|PGRC1_BOVIN Membrane-associated progesterone receptor component 1 OS=Bos taurus OX=9913 GN=PGRMC1 PE=2 SV=3	1	8	8	8	8	6	6	5	8	7	8	7	8	7	6	3	8	8	8	7	8	6	6	5	8	7	8	7	8	7	6	3	8	8	8	7	8	6	6	5	8	7	8	7
sp|Q17QC5|AP2S1_BOVIN	sp|Q17QC5|AP2S1_BOVIN	4	4	4	>sp|Q17QC5|AP2S1_BOVIN AP-2 complex subunit sigma OS=Bos taurus OX=9913 GN=AP2S1 PE=2 SV=1	1	4	4	4	4	4	3	4	3	3	4	4	4	4	1	0	4	4	4	4	4	4	3	4	3	3	4	4	4	4	1	0	4	4	4	4	4	4	3	4	3	3	4	4
sp|Q17QG2|NUDC_BOVIN	sp|Q17QG2|NUDC_BOVIN	6	6	6	>sp|Q17QG2|NUDC_BOVIN Nuclear migration protein nudC OS=Bos taurus OX=9913 GN=NUDC PE=2 SV=1	1	6	6	6	3	6	4	6	4	5	6	6	4	5	3	3	5	5	5	4	3	6	4	6	4	5	6	6	4	5	3	3	5	5	5	4	3	6	4	6	4	5	6	6
sp|Q17QH8|D39U1_BOVIN	sp|Q17QH8|D39U1_BOVIN	5	5	5	>sp|Q17QH8|D39U1_BOVIN Epimerase family protein SDR39U1 OS=Bos taurus OX=9913 GN=SDR39U1 PE=2 SV=1	1	5	5	5	5	5	3	5	4	4	5	4	5	5	3	3	5	4	4	5	5	5	3	5	4	4	5	4	5	5	3	3	5	4	4	5	5	5	3	5	4	4	5	4
sp|Q17QJ1|ACSF2_BOVIN	sp|Q17QJ1|ACSF2_BOVIN	5	5	5	>sp|Q17QJ1|ACSF2_BOVIN Medium-chain acyl-CoA ligase ACSF2, mitochondrial OS=Bos taurus OX=9913 GN=ACSF2 PE=2 SV=1	1	5	5	5	3	4	3	3	3	1	3	4	4	5	2	3	1	1	4	3	3	4	3	3	3	1	3	4	4	5	2	3	1	1	4	3	3	4	3	3	3	1	3	4
sp|Q17QK8|SPRE_BOVIN	sp|Q17QK8|SPRE_BOVIN	5	5	5	>sp|Q17QK8|SPRE_BOVIN Sepiapterin reductase OS=Bos taurus OX=9913 GN=SPR PE=2 SV=1	1	5	5	5	5	5	5	4	5	5	4	5	5	5	2	3	5	5	4	5	5	5	5	4	5	5	4	5	5	5	2	3	5	5	4	5	5	5	5	4	5	5	4	5
sp|Q17QM9|CNRP1_BOVIN	sp|Q17QM9|CNRP1_BOVIN	6	6	6	>sp|Q17QM9|CNRP1_BOVIN CB1 cannabinoid receptor-interacting protein 1 OS=Bos taurus OX=9913 GN=CNRIP1 PE=2 SV=1	1	6	6	6	6	6	6	5	6	5	6	5	6	6	3	3	6	6	6	6	6	6	6	5	6	5	6	5	6	6	3	3	6	6	6	6	6	6	6	5	6	5	6	5
sp|Q17QQ3|SNP25_BOVIN	sp|Q17QQ3|SNP25_BOVIN	26	26	26	>sp|Q17QQ3|SNP25_BOVIN Synaptosomal-associated protein 25 OS=Bos taurus OX=9913 GN=SNAP25 PE=1 SV=1	1	26	26	26	25	25	25	24	24	23	22	24	25	26	16	17	24	23	25	23	25	25	25	24	24	23	22	24	25	26	16	17	24	23	25	23	25	25	25	24	24	23	22	24
sp|Q17R14|MYO1D_BOVIN	sp|Q17R14|MYO1D_BOVIN	12	12	12	>sp|Q17R14|MYO1D_BOVIN Unconventional myosin-Id OS=Bos taurus OX=9913 GN=MYO1D PE=2 SV=1	1	12	12	12	5	5	8	10	9	9	3	2	5	4	2	0	5	2	0	1	5	5	8	10	9	9	3	2	5	4	2	0	5	2	0	1	5	5	8	10	9	9	3	2
sp|Q1JP79|ARC1A_BOVIN	sp|Q1JP79|ARC1A_BOVIN	10	10	10	>sp|Q1JP79|ARC1A_BOVIN Actin-related protein 2/3 complex subunit 1A OS=Bos taurus OX=9913 GN=ARPC1A PE=2 SV=1	1	10	10	10	9	9	9	9	9	10	10	10	10	10	7	5	9	8	9	7	9	9	9	9	9	10	10	10	10	10	7	5	9	8	9	7	9	9	9	9	9	10	10	10
sp|Q1JPA0|AL3B1_BOVIN	sp|Q1JPA0|AL3B1_BOVIN	5	5	5	>sp|Q1JPA0|AL3B1_BOVIN Aldehyde dehydrogenase family 3 member B1 OS=Bos taurus OX=9913 GN=ALDH3B1 PE=2 SV=1	1	5	5	5	3	2	5	4	5	4	3	2	3	2	0	0	1	1	1	1	3	2	5	4	5	4	3	2	3	2	0	0	1	1	1	1	3	2	5	4	5	4	3	2
sp|Q1JPH6|IF4H_BOVIN	sp|Q1JPH6|IF4H_BOVIN	5	5	5	>sp|Q1JPH6|IF4H_BOVIN Eukaryotic translation initiation factor 4H OS=Bos taurus OX=9913 GN=EIF4H PE=2 SV=1	1	5	5	5	4	4	3	3	3	3	4	4	5	5	3	2	4	4	5	4	4	4	3	3	3	3	4	4	5	5	3	2	4	4	5	4	4	4	3	3	3	3	4	4
sp|Q1JQE6|NCEH1_BOVIN	sp|Q1JQE6|NCEH1_BOVIN	5	5	5	>sp|Q1JQE6|NCEH1_BOVIN Neutral cholesterol ester hydrolase 1 OS=Bos taurus OX=9913 GN=NCEH1 PE=2 SV=2	1	5	5	5	5	4	4	3	4	4	3	4	4	4	0	1	4	4	4	3	5	4	4	3	4	4	3	4	4	4	0	1	4	4	4	3	5	4	4	3	4	4	3	4
sp|Q1RMH8|SNX3_BOVIN	sp|Q1RMH8|SNX3_BOVIN	4	4	4	>sp|Q1RMH8|SNX3_BOVIN Sorting nexin-3 OS=Bos taurus OX=9913 GN=SNX3 PE=2 SV=3	1	4	4	4	4	4	4	4	4	4	4	4	4	4	2	3	4	4	4	4	4	4	4	4	4	4	4	4	4	4	2	3	4	4	4	4	4	4	4	4	4	4	4	4
sp|Q1RMX2|UB2D2_BOVIN;sp|Q3ZCF7|UB2D3_BOVIN;sp|Q2TA10|UB2D1_BOVIN	sp|Q1RMX2|UB2D2_BOVIN;sp|Q3ZCF7|UB2D3_BOVIN	4;2;1	4;2;1	4;2;1	>sp|Q1RMX2|UB2D2_BOVIN Ubiquitin-conjugating enzyme E2 D2 OS=Bos taurus OX=9913 GN=UBE2D2 PE=2 SV=1;>sp|Q3ZCF7|UB2D3_BOVIN Ubiquitin-conjugating enzyme E2 D3 OS=Bos taurus OX=9913 GN=UBE2D3 PE=2 SV=1	3	4	4	4	3	2	4	3	4	4	3	3	3	4	1	1	3	2	2	2	3	2	4	3	4	4	3	3	3	4	1	1	3	2	2	2	3	2	4	3	4	4	3	3
sp|Q27955|KCAB2_BOVIN	sp|Q27955|KCAB2_BOVIN	5	5	5	>sp|Q27955|KCAB2_BOVIN Voltage-gated potassium channel subunit beta-2 OS=Bos taurus OX=9913 GN=KCNAB2 PE=1 SV=1	1	5	5	5	3	4	5	5	5	5	4	4	4	3	1	1	3	3	3	3	3	4	5	5	5	5	4	4	4	3	1	1	3	3	3	3	3	4	5	5	5	5	4	4
sp|Q27957|TPPP_BOVIN	sp|Q27957|TPPP_BOVIN	25	25	25	>sp|Q27957|TPPP_BOVIN Tubulin polymerization-promoting protein OS=Bos taurus OX=9913 GN=TPPP PE=1 SV=1	1	25	25	25	21	20	23	23	25	23	24	24	24	22	16	18	22	23	21	22	21	20	23	23	25	23	24	24	24	22	16	18	22	23	21	22	21	20	23	23	25	23	24	24
sp|Q27975|HS71A_BOVIN;sp|Q27965|HS71B_BOVIN	sp|Q27975|HS71A_BOVIN;sp|Q27965|HS71B_BOVIN	33;33	28;28	20;20	>sp|Q27975|HS71A_BOVIN Heat shock 70 kDa protein 1A OS=Bos taurus OX=9913 GN=HSPA1A PE=1 SV=2;>sp|Q27965|HS71B_BOVIN Heat shock 70 kDa protein 1B OS=Bos taurus OX=9913 GN=HSPA1B PE=2 SV=1	2	33	28	20	27	28	29	29	29	27	29	27	29	29	29	28	29	30	29	29	22	23	24	24	24	22	24	22	24	24	24	23	24	25	24	24	16	16	17	17	17	15	18	16
sp|Q27974|AUXI_BOVIN	sp|Q27974|AUXI_BOVIN	17	17	17	>sp|Q27974|AUXI_BOVIN Putative tyrosine-protein phosphatase auxilin OS=Bos taurus OX=9913 GN=DNAJC6 PE=1 SV=1	1	17	17	17	11	13	14	15	14	14	10	12	13	13	4	5	12	14	13	12	11	13	14	15	14	14	10	12	13	13	4	5	12	14	13	12	11	13	14	15	14	14	10	12
sp|Q27991|MYH10_BOVIN	sp|Q27991|MYH10_BOVIN	66	66	65	>sp|Q27991|MYH10_BOVIN Myosin-10 OS=Bos taurus OX=9913 GN=MYH10 PE=2 SV=2	1	66	66	65	59	58	54	56	58	56	58	60	60	58	48	44	53	58	59	56	59	58	54	56	58	56	58	60	60	58	48	44	53	58	59	56	58	57	53	55	57	55	57	59
sp|Q28021|ROCK2_BOVIN	sp|Q28021|ROCK2_BOVIN	6	6	6	>sp|Q28021|ROCK2_BOVIN Rho-associated protein kinase 2 OS=Bos taurus OX=9913 GN=ROCK2 PE=1 SV=1	1	6	6	6	3	3	5	4	4	4	4	4	4	4	3	2	3	4	2	3	3	3	5	4	4	4	4	4	4	4	3	2	3	4	2	3	3	3	5	4	4	4	4	4
sp|Q28029|VATF_BOVIN	sp|Q28029|VATF_BOVIN	6	6	6	>sp|Q28029|VATF_BOVIN V-type proton ATPase subunit F OS=Bos taurus OX=9913 GN=ATP6V1F PE=1 SV=2	1	6	6	6	6	5	5	5	6	6	5	5	6	6	2	3	4	5	5	4	6	5	5	5	6	6	5	5	6	6	2	3	4	5	5	4	6	5	5	5	6	6	5	5
sp|Q28030|AT1B2_BOVIN	sp|Q28030|AT1B2_BOVIN	9	9	9	>sp|Q28030|AT1B2_BOVIN Sodium/potassium-transporting ATPase subunit beta-2 OS=Bos taurus OX=9913 GN=ATP1B2 PE=2 SV=1	1	9	9	9	8	8	8	8	9	9	9	9	9	9	5	5	7	9	8	7	8	8	8	8	9	9	9	9	9	9	5	5	7	9	8	7	8	8	8	8	9	9	9	9
sp|Q28055|ARP19_BOVIN	sp|Q28055|ARP19_BOVIN	4	4	3	>sp|Q28055|ARP19_BOVIN cAMP-regulated phosphoprotein 19 OS=Bos taurus OX=9913 GN=ARPP19 PE=1 SV=2	1	4	4	3	3	3	3	3	3	3	3	3	3	3	1	2	3	3	3	4	3	3	3	3	3	3	3	3	3	3	1	2	3	3	3	4	2	2	2	2	2	2	2	2
sp|Q28062|PGCB_BOVIN	sp|Q28062|PGCB_BOVIN	20	20	20	>sp|Q28062|PGCB_BOVIN Brevican core protein OS=Bos taurus OX=9913 GN=BCAN PE=1 SV=1	1	20	20	20	17	16	18	18	19	18	15	16	19	19	9	10	17	18	19	18	17	16	18	18	19	18	15	16	19	19	9	10	17	18	19	18	17	16	18	18	19	18	15	16
sp|Q28106|CNTN1_BOVIN	sp|Q28106|CNTN1_BOVIN	49	49	49	>sp|Q28106|CNTN1_BOVIN Contactin-1 OS=Bos taurus OX=9913 GN=CNTN1 PE=2 SV=1	1	49	49	49	42	40	45	44	47	46	45	44	47	48	29	25	45	47	44	40	42	40	45	44	47	46	45	44	47	48	29	25	45	47	44	40	42	40	45	44	47	46	45	44
sp|Q28115|GFAP_BOVIN;CON__Q61726;CON__O43790;sp|A4FUZ0|KRT83_BOVIN;CON__Q6NT21;CON__P78385;sp|Q148H4|KRT81_BOVIN;CON__Q14533;CON__P78386;CON__Q6KB66-1	sp|Q28115|GFAP_BOVIN	73;2;2;2;2;2;2;2;2;1	73;2;2;2;2;2;2;2;2;1	69;0;0;0;0;0;0;0;0;0	>sp|Q28115|GFAP_BOVIN Glial fibrillary acidic protein OS=Bos taurus OX=9913 GN=GFAP PE=1 SV=2	10	73	73	69	66	65	64	68	70	72	70	67	70	69	65	64	71	72	71	71	66	65	64	68	70	72	70	67	70	69	65	64	71	72	71	71	62	62	60	64	66	69	66	63
sp|Q28146|NRX1A_BOVIN	sp|Q28146|NRX1A_BOVIN	4	4	4	>sp|Q28146|NRX1A_BOVIN Neurexin-1 OS=Bos taurus OX=9913 GN=NRXN1 PE=1 SV=1	1	4	4	4	4	3	1	2	2	2	3	2	3	3	0	0	4	3	2	3	4	3	1	2	2	2	3	2	3	3	0	0	4	3	2	3	4	3	1	2	2	2	3	2
sp|Q28824|MYLK_BOVIN	sp|Q28824|MYLK_BOVIN	4	4	4	>sp|Q28824|MYLK_BOVIN Myosin light chain kinase, smooth muscle OS=Bos taurus OX=9913 GN=MYLK PE=1 SV=1	1	4	4	4	1	2	1	1	1	1	2	1	2	2	3	3	2	1	1	4	1	2	1	1	1	1	2	1	2	2	3	3	2	1	1	4	1	2	1	1	1	1	2	1
sp|Q28852|ATP5L_BOVIN	sp|Q28852|ATP5L_BOVIN	4	4	4	>sp|Q28852|ATP5L_BOVIN ATP synthase subunit g, mitochondrial OS=Bos taurus OX=9913 GN=ATP5MG PE=1 SV=3	1	4	4	4	4	4	3	4	4	4	4	4	4	4	2	3	4	3	4	3	4	4	3	4	4	4	4	4	4	4	2	3	4	3	4	3	4	4	3	4	4	4	4	4
sp|Q29397|SV2A_BOVIN	sp|Q29397|SV2A_BOVIN	14	14	14	>sp|Q29397|SV2A_BOVIN Synaptic vesicle glycoprotein 2A OS=Bos taurus OX=9913 GN=SV2A PE=2 SV=1	1	14	14	14	12	13	11	12	11	12	13	12	14	13	8	6	14	13	12	11	12	13	11	12	11	12	13	12	14	13	8	6	14	13	12	11	12	13	11	12	11	12	13	12
sp|Q29437|AOCX_BOVIN	sp|Q29437|AOCX_BOVIN	6	6	3	>sp|Q29437|AOCX_BOVIN Primary amine oxidase, liver isozyme OS=Bos taurus OX=9913 PE=1 SV=1	1	6	6	3	1	2	0	0	0	0	0	1	0	2	4	5	2	3	4	3	1	2	0	0	0	0	0	1	0	2	4	5	2	3	4	3	0	1	0	0	0	0	0	0
sp|Q29449|AT8A1_BOVIN	sp|Q29449|AT8A1_BOVIN	6	6	6	>sp|Q29449|AT8A1_BOVIN Probable phospholipid-transporting ATPase IA OS=Bos taurus OX=9913 GN=ATP8A1 PE=1 SV=2	1	6	6	6	3	2	2	2	5	4	5	6	5	6	1	1	6	5	4	1	3	2	2	2	5	4	5	6	5	6	1	1	6	5	4	1	3	2	2	2	5	4	5	6
sp|Q29455|DNJC5_BOVIN	sp|Q29455|DNJC5_BOVIN	8	8	8	>sp|Q29455|DNJC5_BOVIN DnaJ homolog subfamily C member 5 OS=Bos taurus OX=9913 GN=DNAJC5 PE=1 SV=1	1	8	8	8	5	6	5	5	7	7	7	8	6	6	1	3	6	6	4	7	5	6	5	5	7	7	7	8	6	6	1	3	6	6	4	7	5	6	5	5	7	7	7	8
sp|Q29465|SYYC_BOVIN	sp|Q29465|SYYC_BOVIN	4	4	4	>sp|Q29465|SYYC_BOVIN Tyrosine--tRNA ligase, cytoplasmic OS=Bos taurus OX=9913 GN=YARS1 PE=2 SV=4	1	4	4	4	3	3	3	4	4	3	4	3	4	4	0	1	4	4	3	2	3	3	3	4	4	3	4	3	4	4	0	1	4	4	3	2	3	3	3	4	4	3	4	3
sp|Q29466|VPP1_BOVIN	sp|Q29466|VPP1_BOVIN	28	28	28	>sp|Q29466|VPP1_BOVIN V-type proton ATPase 116 kDa subunit a 1 OS=Bos taurus OX=9913 GN=ATP6V0A1 PE=1 SV=1	1	28	28	28	26	25	25	24	28	27	26	26	26	26	14	13	26	26	28	27	26	25	25	24	28	27	26	26	26	26	14	13	26	26	28	27	26	25	25	24	28	27	26	26
sp|Q29RK1|CISY_BOVIN	sp|Q29RK1|CISY_BOVIN	20	20	20	>sp|Q29RK1|CISY_BOVIN Citrate synthase, mitochondrial OS=Bos taurus OX=9913 GN=CS PE=1 SV=1	1	20	20	20	19	18	16	15	16	16	17	18	16	17	8	12	19	16	15	16	19	18	16	15	16	16	17	18	16	17	8	12	19	16	15	16	19	18	16	15	16	16	17	18
sp|Q29RK2|PYC_BOVIN	sp|Q29RK2|PYC_BOVIN	13	13	13	>sp|Q29RK2|PYC_BOVIN Pyruvate carboxylase, mitochondrial OS=Bos taurus OX=9913 GN=PC PE=2 SV=2	1	13	13	13	11	13	10	10	12	12	12	12	12	12	3	3	11	9	12	11	11	13	10	10	12	12	12	12	12	12	3	3	11	9	12	11	11	13	10	10	12	12	12	12
sp|Q29RK4|RD23B_BOVIN	sp|Q29RK4|RD23B_BOVIN	7	7	6	>sp|Q29RK4|RD23B_BOVIN UV excision repair protein RAD23 homolog B OS=Bos taurus OX=9913 GN=RAD23B PE=2 SV=1	1	7	7	6	6	6	6	5	6	6	6	5	6	7	6	5	5	6	7	6	6	6	6	5	6	6	6	5	6	7	6	5	5	6	7	6	5	5	5	4	5	5	5	4
sp|Q29RM3|REEP5_BOVIN	sp|Q29RM3|REEP5_BOVIN	4	4	4	>sp|Q29RM3|REEP5_BOVIN Receptor expression-enhancing protein 5 OS=Bos taurus OX=9913 GN=REEP5 PE=2 SV=1	1	4	4	4	4	3	4	3	4	3	4	3	4	4	2	3	4	4	4	3	4	3	4	3	4	3	4	3	4	4	2	3	4	4	4	3	4	3	4	3	4	3	4	3
sp|Q29RQ3|DC1I1_BOVIN	sp|Q29RQ3|DC1I1_BOVIN	6	6	6	>sp|Q29RQ3|DC1I1_BOVIN Cytoplasmic dynein 1 intermediate chain 1 OS=Bos taurus OX=9913 GN=DYNC1I1 PE=1 SV=1	1	6	6	6	4	5	6	6	4	4	3	5	5	6	3	2	3	6	5	5	4	5	6	6	4	4	3	5	5	6	3	2	3	6	5	5	4	5	6	6	4	4	3	5
sp|Q29RZ0|THIL_BOVIN	sp|Q29RZ0|THIL_BOVIN	9	9	9	>sp|Q29RZ0|THIL_BOVIN Acetyl-CoA acetyltransferase, mitochondrial OS=Bos taurus OX=9913 GN=ACAT1 PE=2 SV=1	1	9	9	9	7	8	8	9	7	7	7	7	7	8	6	7	8	7	7	7	7	8	8	9	7	7	7	7	7	8	6	7	8	7	7	7	7	8	8	9	7	7	7	7
sp|Q2HJ33|OLA1_BOVIN	sp|Q2HJ33|OLA1_BOVIN	6	6	6	>sp|Q2HJ33|OLA1_BOVIN Obg-like ATPase 1 OS=Bos taurus OX=9913 GN=OLA1 PE=2 SV=1	1	6	6	6	5	5	4	4	5	5	5	4	5	5	3	3	5	5	5	5	5	5	4	4	5	5	5	4	5	5	3	3	5	5	5	5	5	5	4	4	5	5	5	4
sp|Q2HJ38|CNN1_BOVIN	sp|Q2HJ38|CNN1_BOVIN	14	14	14	>sp|Q2HJ38|CNN1_BOVIN Calponin-1 OS=Bos taurus OX=9913 GN=CNN1 PE=2 SV=1	1	14	14	14	5	3	0	1	0	1	5	3	1	4	12	13	2	1	11	13	5	3	0	1	0	1	5	3	1	4	12	13	2	1	11	13	5	3	0	1	0	1	5	3
sp|Q2HJ49|MOES_BOVIN	sp|Q2HJ49|MOES_BOVIN	15	9	9	>sp|Q2HJ49|MOES_BOVIN Moesin OS=Bos taurus OX=9913 GN=MSN PE=2 SV=3	1	15	9	9	11	11	10	11	11	10	10	10	13	12	11	11	12	13	13	14	6	5	4	5	5	4	4	4	7	6	6	6	6	7	7	8	6	5	4	5	5	4	4	4
sp|Q2HJ58|PRPS1_BOVIN	sp|Q2HJ58|PRPS1_BOVIN	9	9	9	>sp|Q2HJ58|PRPS1_BOVIN Ribose-phosphate pyrophosphokinase 1 OS=Bos taurus OX=9913 GN=PRPS1 PE=2 SV=3	1	9	9	9	7	6	6	5	8	8	7	7	8	7	5	4	7	7	7	7	7	6	6	5	8	8	7	7	8	7	5	4	7	7	7	7	7	6	6	5	8	8	7	7
sp|Q2HJ60|ROA2_BOVIN	sp|Q2HJ60|ROA2_BOVIN	20	20	20	>sp|Q2HJ60|ROA2_BOVIN Heterogeneous nuclear ribonucleoproteins A2/B1 OS=Bos taurus OX=9913 GN=HNRNPA2B1 PE=2 SV=1	1	20	20	20	17	16	16	15	16	15	18	18	18	18	14	13	16	17	15	17	17	16	16	15	16	15	18	18	18	18	14	13	16	17	15	17	17	16	16	15	16	15	18	18
sp|Q2HJ86|TBA1D_BOVIN	sp|Q2HJ86|TBA1D_BOVIN	40	15	3	>sp|Q2HJ86|TBA1D_BOVIN Tubulin alpha-1D chain OS=Bos taurus OX=9913 GN=TUBA1D PE=1 SV=1	1	40	15	3	38	38	35	35	37	38	39	38	40	40	30	31	38	38	37	38	14	14	12	12	14	14	15	14	15	15	12	12	13	13	13	14	3	3	2	2	2	2	3	3
sp|Q2HJ94|DNJA2_BOVIN	sp|Q2HJ94|DNJA2_BOVIN	5	5	5	>sp|Q2HJ94|DNJA2_BOVIN DnaJ homolog subfamily A member 2 OS=Bos taurus OX=9913 GN=DNAJA2 PE=2 SV=1	1	5	5	5	5	3	4	4	3	4	4	5	5	5	2	3	5	5	4	3	5	3	4	4	3	4	4	5	5	5	2	3	5	5	4	3	5	3	4	4	3	4	4	5
sp|Q2HJ97|PHB2_BOVIN	sp|Q2HJ97|PHB2_BOVIN	17	17	17	>sp|Q2HJ97|PHB2_BOVIN Prohibitin-2 OS=Bos taurus OX=9913 GN=PHB2 PE=2 SV=1	1	17	17	17	15	15	15	13	14	14	14	14	15	16	11	11	16	16	13	16	15	15	15	13	14	14	14	14	15	16	11	11	16	16	13	16	15	15	15	13	14	14	14	14
sp|Q2HJD7|3HIDH_BOVIN	sp|Q2HJD7|3HIDH_BOVIN	5	5	5	>sp|Q2HJD7|3HIDH_BOVIN 3-hydroxyisobutyrate dehydrogenase, mitochondrial OS=Bos taurus OX=9913 GN=HIBADH PE=2 SV=1	1	5	5	5	4	5	3	2	2	4	4	2	5	5	4	2	4	4	4	5	4	5	3	2	2	4	4	2	5	5	4	2	4	4	4	5	4	5	3	2	2	4	4	2
sp|Q2HJF7|KCC2D_BOVIN	sp|Q2HJF7|KCC2D_BOVIN	15	10	10	>sp|Q2HJF7|KCC2D_BOVIN Calcium/calmodulin-dependent protein kinase type II subunit delta OS=Bos taurus OX=9913 GN=CAMK2D PE=2 SV=1	1	15	10	10	12	14	14	15	14	15	14	15	15	14	10	11	14	15	15	15	7	9	9	10	9	10	9	10	10	9	5	6	9	10	10	10	7	9	9	10	9	10	9	10
sp|Q2HJG5|VPS35_BOVIN	sp|Q2HJG5|VPS35_BOVIN	12	12	12	>sp|Q2HJG5|VPS35_BOVIN Vacuolar protein sorting-associated protein 35 OS=Bos taurus OX=9913 GN=VPS35 PE=2 SV=1	1	12	12	12	11	8	9	9	10	9	10	12	11	11	6	4	11	11	9	10	11	8	9	9	10	9	10	12	11	11	6	4	11	11	9	10	11	8	9	9	10	9	10	12
sp|Q2HJH2|RAB1B_BOVIN;sp|Q1RMR4|RAB15_BOVIN	sp|Q2HJH2|RAB1B_BOVIN	8;1	8;1	7;0	>sp|Q2HJH2|RAB1B_BOVIN Ras-related protein Rab-1B OS=Bos taurus OX=9913 GN=RAB1B PE=2 SV=1	2	8	8	7	7	7	7	7	7	7	7	8	7	7	6	5	7	7	7	7	7	7	7	7	7	7	7	8	7	7	6	5	7	7	7	7	6	6	6	6	6	6	6	7
sp|Q2HJH3|CK054_BOVIN	sp|Q2HJH3|CK054_BOVIN	5	5	5	>sp|Q2HJH3|CK054_BOVIN Ester hydrolase C11orf54 homolog OS=Bos taurus OX=9913 PE=2 SV=1	1	5	5	5	5	5	5	5	5	5	5	5	5	5	3	5	5	5	5	5	5	5	5	5	5	5	5	5	5	5	3	5	5	5	5	5	5	5	5	5	5	5	5	5
sp|Q2HJH9|PDCD5_BOVIN	sp|Q2HJH9|PDCD5_BOVIN	4	4	4	>sp|Q2HJH9|PDCD5_BOVIN Programmed cell death protein 5 OS=Bos taurus OX=9913 GN=PDCD5 PE=2 SV=3	1	4	4	4	4	4	4	3	4	4	4	4	4	4	3	2	4	4	4	4	4	4	4	3	4	4	4	4	4	4	3	2	4	4	4	4	4	4	4	3	4	4	4	4
sp|Q2KHX6|CRYM_BOVIN	sp|Q2KHX6|CRYM_BOVIN	12	12	12	>sp|Q2KHX6|CRYM_BOVIN Ketimine reductase mu-crystallin OS=Bos taurus OX=9913 GN=CRYM PE=2 SV=1	1	12	12	12	11	10	10	10	11	10	10	10	11	11	9	8	12	12	11	12	11	10	10	10	11	10	10	10	11	11	9	8	12	12	11	12	11	10	10	10	11	10	10	10
sp|Q2KHY1|CPNE6_BOVIN	sp|Q2KHY1|CPNE6_BOVIN	10	10	10	>sp|Q2KHY1|CPNE6_BOVIN Copine-6 OS=Bos taurus OX=9913 GN=CPNE6 PE=2 SV=1	1	10	10	10	7	9	6	7	7	6	5	6	7	7	2	0	9	9	9	9	7	9	6	7	7	6	5	6	7	7	2	0	9	9	9	9	7	9	6	7	7	6	5	6
sp|Q2KI07|ARL8B_BOVIN	sp|Q2KI07|ARL8B_BOVIN	7	7	7	>sp|Q2KI07|ARL8B_BOVIN ADP-ribosylation factor-like protein 8B OS=Bos taurus OX=9913 GN=ARL8B PE=2 SV=1	1	7	7	7	5	3	6	7	6	7	4	4	5	5	3	3	7	5	5	6	5	3	6	7	6	7	4	4	5	5	3	3	7	5	5	6	5	3	6	7	6	7	4	4
sp|Q2KI42|PSD11_BOVIN	sp|Q2KI42|PSD11_BOVIN	7	7	7	>sp|Q2KI42|PSD11_BOVIN 26S proteasome non-ATPase regulatory subunit 11 OS=Bos taurus OX=9913 GN=PSMD11 PE=2 SV=3	1	7	7	7	6	4	4	5	6	5	6	6	5	6	3	3	5	3	3	4	6	4	4	5	6	5	6	6	5	6	3	3	5	3	3	4	6	4	4	5	6	5	6	6
sp|Q2KIA5|DNM1L_BOVIN	sp|Q2KIA5|DNM1L_BOVIN	31	31	31	>sp|Q2KIA5|DNM1L_BOVIN Dynamin-1-like protein OS=Bos taurus OX=9913 GN=DNM1L PE=2 SV=1	1	31	31	31	26	28	27	23	26	29	30	27	29	28	9	7	26	27	24	25	26	28	27	23	26	29	30	27	29	28	9	7	26	27	24	25	26	28	27	23	26	29	30	27
sp|Q2KIB0|FAHD2_BOVIN	sp|Q2KIB0|FAHD2_BOVIN	4	4	4	>sp|Q2KIB0|FAHD2_BOVIN Fumarylacetoacetate hydrolase domain-containing protein 2 OS=Bos taurus OX=9913 GN=FAHD2 PE=2 SV=1	1	4	4	4	2	4	3	2	2	3	3	2	3	3	2	2	4	3	4	4	2	4	3	2	2	3	3	2	3	3	2	2	4	3	4	4	2	4	3	2	2	3	3	2
sp|Q2KIV2|TIM9_BOVIN	sp|Q2KIV2|TIM9_BOVIN	4	4	4	>sp|Q2KIV2|TIM9_BOVIN Mitochondrial import inner membrane translocase subunit Tim9 OS=Bos taurus OX=9913 GN=TIMM9 PE=3 SV=1	1	4	4	4	4	3	3	3	3	3	4	4	3	4	2	2	4	4	4	4	4	3	3	3	3	3	4	4	3	4	2	2	4	4	4	4	4	3	3	3	3	3	4	4
sp|Q2KIW6|PRS10_BOVIN	sp|Q2KIW6|PRS10_BOVIN	4	4	4	>sp|Q2KIW6|PRS10_BOVIN 26S proteasome regulatory subunit 10B OS=Bos taurus OX=9913 GN=PSMC6 PE=2 SV=1	1	4	4	4	3	3	3	2	4	3	2	3	4	3	3	2	3	4	1	2	3	3	3	2	4	3	2	3	4	3	3	2	3	4	1	2	3	3	3	2	4	3	2	3
sp|Q2KIW9|KCY_BOVIN	sp|Q2KIW9|KCY_BOVIN	9	9	9	>sp|Q2KIW9|KCY_BOVIN UMP-CMP kinase OS=Bos taurus OX=9913 GN=CMPK1 PE=2 SV=2	1	9	9	9	6	6	9	8	8	8	8	7	8	7	4	5	8	5	7	7	6	6	9	8	8	8	8	7	8	7	4	5	8	5	7	7	6	6	9	8	8	8	8	7
sp|Q2KJ32|SBP1_BOVIN	sp|Q2KJ32|SBP1_BOVIN	8	8	8	>sp|Q2KJ32|SBP1_BOVIN Methanethiol oxidase OS=Bos taurus OX=9913 GN=SELENBP1 PE=1 SV=1	1	8	8	8	5	4	2	3	5	3	7	7	6	5	7	7	4	6	6	5	5	4	2	3	5	3	7	7	6	5	7	7	4	6	6	5	5	4	2	3	5	3	7	7
sp|Q2KJ44|PTPA_BOVIN	sp|Q2KJ44|PTPA_BOVIN	6	6	6	>sp|Q2KJ44|PTPA_BOVIN Serine/threonine-protein phosphatase 2A activator OS=Bos taurus OX=9913 GN=PTPA PE=2 SV=1	1	6	6	6	6	5	5	4	5	4	4	4	6	5	2	2	5	6	5	6	6	5	5	4	5	4	4	4	6	5	2	2	5	6	5	6	6	5	5	4	5	4	4	4
sp|Q2KJ46|PSMD3_BOVIN	sp|Q2KJ46|PSMD3_BOVIN	4	4	4	>sp|Q2KJ46|PSMD3_BOVIN 26S proteasome non-ATPase regulatory subunit 3 OS=Bos taurus OX=9913 GN=PSMD3 PE=2 SV=1	1	4	4	4	4	2	3	3	3	4	2	3	3	1	1	1	4	4	2	3	4	2	3	3	3	4	2	3	3	1	1	1	4	4	2	3	4	2	3	3	3	4	2	3
sp|Q2KJ56|HOME1_BOVIN	sp|Q2KJ56|HOME1_BOVIN	9	9	9	>sp|Q2KJ56|HOME1_BOVIN Homer protein homolog 1 OS=Bos taurus OX=9913 GN=HOMER1 PE=2 SV=1	1	9	9	9	6	7	7	7	9	9	7	8	8	8	1	1	6	8	6	8	6	7	7	7	9	9	7	8	8	8	1	1	6	8	6	8	6	7	7	7	9	9	7	8
sp|Q2KJ93|CDC42_BOVIN	sp|Q2KJ93|CDC42_BOVIN	10	9	9	>sp|Q2KJ93|CDC42_BOVIN Cell division control protein 42 homolog OS=Bos taurus OX=9913 GN=CDC42 PE=1 SV=1	1	10	9	9	10	9	9	8	10	10	9	10	10	10	9	7	10	10	10	9	9	9	9	8	9	9	9	9	9	9	8	6	9	9	9	9	9	9	9	8	9	9	9	9
sp|Q2KJ97|NCDN_BOVIN	sp|Q2KJ97|NCDN_BOVIN	21	21	21	>sp|Q2KJ97|NCDN_BOVIN Neurochondrin OS=Bos taurus OX=9913 GN=NCDN PE=2 SV=1	1	21	21	21	19	21	18	20	18	20	17	19	21	20	9	7	17	19	18	18	19	21	18	20	18	20	17	19	21	20	9	7	17	19	18	18	19	21	18	20	18	20	17	19
sp|Q2KJA1|SH3G1_BOVIN	sp|Q2KJA1|SH3G1_BOVIN	7	7	7	>sp|Q2KJA1|SH3G1_BOVIN Endophilin-A2 OS=Bos taurus OX=9913 GN=SH3GL1 PE=2 SV=1	1	7	7	7	4	4	5	6	5	4	4	4	5	5	4	5	6	6	3	4	4	4	5	6	5	4	4	4	5	5	4	5	6	6	3	4	4	4	5	6	5	4	4	4
sp|Q2KJC9|AL7A1_BOVIN	sp|Q2KJC9|AL7A1_BOVIN	11	11	11	>sp|Q2KJC9|AL7A1_BOVIN Alpha-aminoadipic semialdehyde dehydrogenase OS=Bos taurus OX=9913 GN=ALDH7A1 PE=2 SV=4	1	11	11	11	10	10	10	10	10	10	9	8	10	9	10	10	10	9	10	10	10	10	10	10	10	10	9	8	10	9	10	10	10	9	10	10	10	10	10	10	10	10	9	8
sp|Q2KJD0|TBB5_BOVIN	sp|Q2KJD0|TBB5_BOVIN	39	6	6	>sp|Q2KJD0|TBB5_BOVIN Tubulin beta-5 chain OS=Bos taurus OX=9913 GN=TUBB5 PE=2 SV=1	1	39	6	6	36	36	36	35	36	36	33	35	38	38	32	33	35	36	37	36	6	6	6	6	5	6	5	5	6	6	6	6	5	6	5	5	6	6	6	6	5	6	5	5
sp|Q2KJE4|ETFA_BOVIN	sp|Q2KJE4|ETFA_BOVIN	8	8	8	>sp|Q2KJE4|ETFA_BOVIN Electron transfer flavoprotein subunit alpha, mitochondrial OS=Bos taurus OX=9913 GN=ETFA PE=2 SV=1	1	8	8	8	6	6	5	5	7	6	6	5	6	5	5	4	7	6	7	7	6	6	5	5	7	6	6	5	6	5	5	4	7	6	7	7	6	6	5	5	7	6	6	5
sp|Q2KJG3|SYNC_BOVIN	sp|Q2KJG3|SYNC_BOVIN	5	5	5	>sp|Q2KJG3|SYNC_BOVIN Asparagine--tRNA ligase, cytoplasmic OS=Bos taurus OX=9913 GN=NARS PE=2 SV=3	1	5	5	5	4	5	5	5	5	4	5	5	4	5	2	1	5	5	5	5	4	5	5	5	5	4	5	5	4	5	2	1	5	5	5	5	4	5	5	5	5	4	5	5
sp|Q2KJH4|WDR1_BOVIN	sp|Q2KJH4|WDR1_BOVIN	16	16	16	>sp|Q2KJH4|WDR1_BOVIN WD repeat-containing protein 1 OS=Bos taurus OX=9913 GN=WDR1 PE=2 SV=3	1	16	16	16	14	14	15	13	15	14	14	13	15	15	10	10	14	16	14	13	14	14	15	13	15	14	14	13	15	15	10	10	14	16	14	13	14	14	15	13	15	14	14	13
sp|Q2KJH9|AL9A1_BOVIN	sp|Q2KJH9|AL9A1_BOVIN	11	11	11	>sp|Q2KJH9|AL9A1_BOVIN 4-trimethylaminobutyraldehyde dehydrogenase OS=Bos taurus OX=9913 GN=ALDH9A1 PE=2 SV=1	1	11	11	11	9	9	10	9	10	10	10	9	10	10	7	7	9	9	9	8	9	9	10	9	10	10	10	9	10	10	7	7	9	9	9	8	9	9	10	9	10	10	10	9
sp|Q2KJI3|CYRIB_BOVIN	sp|Q2KJI3|CYRIB_BOVIN	9	9	7	>sp|Q2KJI3|CYRIB_BOVIN CYFIP-related Rac1 interactor B OS=Bos taurus OX=9913 GN=CYRIB PE=2 SV=1	1	9	9	7	9	8	9	9	8	8	8	8	8	8	5	5	8	8	8	6	9	8	9	9	8	8	8	8	8	8	5	5	8	8	8	6	7	6	7	7	6	6	6	6
sp|Q2KJI7|AFG32_BOVIN	sp|Q2KJI7|AFG32_BOVIN	7	7	7	>sp|Q2KJI7|AFG32_BOVIN AFG3-like protein 2 OS=Bos taurus OX=9913 GN=AFG3L2 PE=2 SV=1	1	7	7	7	5	4	4	3	6	6	6	6	6	6	3	4	5	6	6	5	5	4	4	3	6	6	6	6	6	6	3	4	5	6	6	5	5	4	4	3	6	6	6	6
sp|Q2KJJ8|PLD3_BOVIN	sp|Q2KJJ8|PLD3_BOVIN	5	5	5	>sp|Q2KJJ8|PLD3_BOVIN 5-3 exonuclease PLD3 OS=Bos taurus OX=9913 GN=PLD3 PE=2 SV=1	1	5	5	5	5	5	5	4	5	5	5	5	5	5	1	0	5	4	4	2	5	5	5	4	5	5	5	5	5	5	1	0	5	4	4	2	5	5	5	4	5	5	5	5
sp|Q2LGB5|TOLIP_BOVIN	sp|Q2LGB5|TOLIP_BOVIN	9	9	9	>sp|Q2LGB5|TOLIP_BOVIN Toll-interacting protein OS=Bos taurus OX=9913 GN=TOLLIP PE=2 SV=1	1	9	9	9	8	8	8	8	8	9	9	8	9	9	4	5	9	8	8	8	8	8	8	8	8	9	9	8	9	9	4	5	9	8	8	8	8	8	8	8	8	9	9	8
sp|Q2NKY7|SEPT2_BOVIN	sp|Q2NKY7|SEPT2_BOVIN	11	11	11	>sp|Q2NKY7|SEPT2_BOVIN Septin-2 OS=Bos taurus OX=9913 GN=SEPTIN2 PE=2 SV=1	1	11	11	11	10	9	9	11	10	10	10	10	10	11	5	7	9	11	8	9	10	9	9	11	10	10	10	10	10	11	5	7	9	11	8	9	10	9	9	11	10	10	10	10
sp|Q2NKZ1|TCPH_BOVIN	sp|Q2NKZ1|TCPH_BOVIN	18	18	18	>sp|Q2NKZ1|TCPH_BOVIN T-complex protein 1 subunit eta OS=Bos taurus OX=9913 GN=CCT7 PE=1 SV=1	1	18	18	18	16	16	16	15	16	15	18	15	18	17	8	9	17	17	17	14	16	16	16	15	16	15	18	15	18	17	8	9	17	17	17	14	16	16	16	15	16	15	18	15
sp|Q2NL05|KIF2A_BOVIN	sp|Q2NL05|KIF2A_BOVIN	4	4	4	>sp|Q2NL05|KIF2A_BOVIN Kinesin-like protein KIF2A OS=Bos taurus OX=9913 GN=KIF2A PE=2 SV=1	1	4	4	4	2	3	3	3	4	3	2	3	3	3	2	1	3	3	3	3	2	3	3	3	4	3	2	3	3	3	2	1	3	3	3	3	2	3	3	3	4	3	2	3
sp|Q2NL29|INO1_BOVIN	sp|Q2NL29|INO1_BOVIN	4	4	4	>sp|Q2NL29|INO1_BOVIN Inositol-3-phosphate synthase 1 OS=Bos taurus OX=9913 GN=ISYNA1 PE=2 SV=1	1	4	4	4	1	1	1	1	1	0	1	0	2	2	4	3	2	2	2	2	1	1	1	1	1	0	1	0	2	2	4	3	2	2	2	2	1	1	1	1	1	0	1	0
sp|Q2T9S0|TBB3_BOVIN	sp|Q2T9S0|TBB3_BOVIN	34	18	16	>sp|Q2T9S0|TBB3_BOVIN Tubulin beta-3 chain OS=Bos taurus OX=9913 GN=TUBB3 PE=1 SV=1	1	34	18	16	34	32	31	31	32	30	30	31	32	34	27	29	32	32	32	30	18	17	16	16	17	15	15	16	17	18	13	15	16	16	16	15	16	15	14	14	15	13	13	14
sp|Q2T9S4|PGP_BOVIN	sp|Q2T9S4|PGP_BOVIN	5	5	5	>sp|Q2T9S4|PGP_BOVIN Glycerol-3-phosphate phosphatase OS=Bos taurus OX=9913 GN=PGP PE=2 SV=1	1	5	5	5	4	5	5	5	5	5	5	5	5	5	4	2	4	5	5	5	4	5	5	5	5	5	5	5	5	5	4	2	4	5	5	5	4	5	5	5	5	5	5	5
sp|Q2T9X2|TCPD_BOVIN	sp|Q2T9X2|TCPD_BOVIN	21	21	21	>sp|Q2T9X2|TCPD_BOVIN T-complex protein 1 subunit delta OS=Bos taurus OX=9913 GN=CCT4 PE=1 SV=3	1	21	21	21	17	17	18	20	18	17	16	17	17	18	9	12	19	16	14	15	17	17	18	20	18	17	16	17	17	18	9	12	19	16	14	15	17	17	18	20	18	17	16	17
sp|Q2T9X8|SPICE_BOVIN	sp|Q2T9X8|SPICE_BOVIN	4	4	4	>sp|Q2T9X8|SPICE_BOVIN Spindle and centriole-associated protein 1 OS=Bos taurus OX=9913 GN=SPICE1 PE=2 SV=1	1	4	4	4	2	1	1	1	1	1	1	1	1	2	2	2	2	2	2	2	2	1	1	1	1	1	1	1	1	2	2	2	2	2	2	2	2	1	1	1	1	1	1	1
sp|Q2TA40|NP1L4_BOVIN	sp|Q2TA40|NP1L4_BOVIN	8	8	6	>sp|Q2TA40|NP1L4_BOVIN Nucleosome assembly protein 1-like 4 OS=Bos taurus OX=9913 GN=NAP1L4 PE=2 SV=1	1	8	8	6	6	6	7	7	7	6	8	7	6	8	2	4	5	5	6	4	6	6	7	7	7	6	8	7	6	8	2	4	5	5	6	4	4	5	5	5	5	4	6	5
sp|Q2TBG8|UCHL3_BOVIN	sp|Q2TBG8|UCHL3_BOVIN	5	5	5	>sp|Q2TBG8|UCHL3_BOVIN Ubiquitin carboxyl-terminal hydrolase isozyme L3 OS=Bos taurus OX=9913 GN=UCHL3 PE=2 SV=1	1	5	5	5	3	4	4	4	4	4	4	4	5	4	4	4	4	4	4	4	3	4	4	4	4	4	4	4	5	4	4	4	4	4	4	4	3	4	4	4	4	4	4	4
sp|Q2TBL6|TALDO_BOVIN	sp|Q2TBL6|TALDO_BOVIN	9	9	9	>sp|Q2TBL6|TALDO_BOVIN Transaldolase OS=Bos taurus OX=9913 GN=TALDO1 PE=2 SV=1	1	9	9	9	7	7	5	5	7	7	7	6	7	7	6	5	5	6	9	7	7	7	5	5	7	7	7	6	7	7	6	5	5	6	9	7	7	7	5	5	7	7	7	6
sp|Q2TBQ5|RL7A_BOVIN	sp|Q2TBQ5|RL7A_BOVIN	6	6	6	>sp|Q2TBQ5|RL7A_BOVIN 60S ribosomal protein L7a OS=Bos taurus OX=9913 GN=RPL7A PE=2 SV=3	1	6	6	6	3	4	3	5	5	5	5	4	5	5	3	4	4	3	4	4	3	4	3	5	5	5	5	4	5	5	3	4	4	3	4	4	3	4	3	5	5	5	5	4
sp|Q2TBQ8|6PGL_BOVIN	sp|Q2TBQ8|6PGL_BOVIN	5	5	5	>sp|Q2TBQ8|6PGL_BOVIN 6-phosphogluconolactonase OS=Bos taurus OX=9913 GN=PGLS PE=2 SV=1	1	5	5	5	5	5	4	4	5	5	5	5	5	5	2	2	1	5	4	5	5	5	4	4	5	5	5	5	5	5	2	2	1	5	4	5	5	5	4	4	5	5	5	5
sp|Q2TBW7|SNX2_BOVIN	sp|Q2TBW7|SNX2_BOVIN	4	4	3	>sp|Q2TBW7|SNX2_BOVIN Sorting nexin-2 OS=Bos taurus OX=9913 GN=SNX2 PE=2 SV=1	1	4	4	3	1	0	4	3	4	4	3	3	4	3	0	0	3	4	2	2	1	0	4	3	4	4	3	3	4	3	0	0	3	4	2	2	1	0	3	3	3	3	2	2
sp|Q2TBX2|PFD3_BOVIN	sp|Q2TBX2|PFD3_BOVIN	6	6	6	>sp|Q2TBX2|PFD3_BOVIN Prefoldin subunit 3 OS=Bos taurus OX=9913 GN=VBP1 PE=2 SV=1	1	6	6	6	2	2	5	6	5	4	3	3	3	5	4	2	4	2	2	4	2	2	5	6	5	4	3	3	3	5	4	2	4	2	2	4	2	2	5	6	5	4	3	3
sp|Q2TBX6|PSB1_BOVIN	sp|Q2TBX6|PSB1_BOVIN	4	4	4	>sp|Q2TBX6|PSB1_BOVIN Proteasome subunit beta type-1 OS=Bos taurus OX=9913 GN=PSMB1 PE=1 SV=1	1	4	4	4	4	4	3	3	4	4	2	3	4	4	3	3	3	2	3	3	4	4	3	3	4	4	2	3	4	4	3	3	3	2	3	3	4	4	3	3	4	4	2	3
sp|Q32KL2|PSB5_BOVIN	sp|Q32KL2|PSB5_BOVIN	4	4	4	>sp|Q32KL2|PSB5_BOVIN Proteasome subunit beta type-5 OS=Bos taurus OX=9913 GN=PSMB5 PE=1 SV=1	1	4	4	4	4	4	4	3	4	4	4	4	4	4	3	3	4	4	3	4	4	4	4	3	4	4	4	4	4	4	3	3	4	4	3	4	4	4	4	3	4	4	4	4
sp|Q32KP9|NTF2_BOVIN	sp|Q32KP9|NTF2_BOVIN	4	4	4	>sp|Q32KP9|NTF2_BOVIN Nuclear transport factor 2 OS=Bos taurus OX=9913 GN=NUTF2 PE=2 SV=1	1	4	4	4	4	4	4	4	4	4	4	4	4	4	3	3	4	4	4	4	4	4	4	4	4	4	4	4	4	4	3	3	4	4	4	4	4	4	4	4	4	4	4	4
sp|Q32KX0|ISOC2_BOVIN	sp|Q32KX0|ISOC2_BOVIN	5	5	5	>sp|Q32KX0|ISOC2_BOVIN Isochorismatase domain-containing protein 2 OS=Bos taurus OX=9913 GN=ISOC2 PE=2 SV=1	1	5	5	5	5	5	1	1	4	3	3	4	5	3	1	1	2	3	4	4	5	5	1	1	4	3	3	4	5	3	1	1	2	3	4	4	5	5	1	1	4	3	3	4
sp|Q32KY0|APOD_BOVIN	sp|Q32KY0|APOD_BOVIN	4	4	4	>sp|Q32KY0|APOD_BOVIN Apolipoprotein D OS=Bos taurus OX=9913 GN=APOD PE=2 SV=1	1	4	4	4	3	3	4	4	4	4	2	2	3	3	1	1	2	2	2	2	3	3	4	4	4	4	2	2	3	3	1	1	2	2	2	2	3	3	4	4	4	4	2	2
sp|Q32L40|TCPA_BOVIN	sp|Q32L40|TCPA_BOVIN	18	18	18	>sp|Q32L40|TCPA_BOVIN T-complex protein 1 subunit alpha OS=Bos taurus OX=9913 GN=TCP1 PE=1 SV=1	1	18	18	18	16	15	17	18	18	17	14	15	15	18	9	8	16	16	16	15	16	15	17	18	18	17	14	15	15	18	9	8	16	16	16	15	16	15	17	18	18	17	14	15
sp|Q32L92|CNN3_BOVIN	sp|Q32L92|CNN3_BOVIN	5	5	5	>sp|Q32L92|CNN3_BOVIN Calponin-3 OS=Bos taurus OX=9913 GN=CNN3 PE=2 SV=1	1	5	5	5	2	1	1	1	1	2	1	2	3	3	5	3	4	3	4	4	2	1	1	1	1	2	1	2	3	3	5	3	4	3	4	4	2	1	1	1	1	2	1	2
sp|Q32L93|GMPR2_BOVIN	sp|Q32L93|GMPR2_BOVIN	4	4	4	>sp|Q32L93|GMPR2_BOVIN GMP reductase 2 OS=Bos taurus OX=9913 GN=GMPR2 PE=2 SV=1	1	4	4	4	3	3	4	3	3	3	3	3	4	4	3	3	2	4	3	3	3	3	4	3	3	3	3	3	4	4	3	3	2	4	3	3	3	3	4	3	3	3	3	3
sp|Q32L96|PHIPL_BOVIN	sp|Q32L96|PHIPL_BOVIN	10	10	8	>sp|Q32L96|PHIPL_BOVIN Phytanoyl-CoA hydroxylase interacting protein-like OS=Bos taurus OX=9913 GN=PHYHIPL PE=2 SV=2	1	10	10	8	10	10	9	9	10	9	9	9	8	10	4	6	10	10	10	10	10	10	9	9	10	9	9	9	8	10	4	6	10	10	10	10	8	8	7	7	8	7	7	7
sp|Q32L99|PTGR2_BOVIN	sp|Q32L99|PTGR2_BOVIN	4	4	4	>sp|Q32L99|PTGR2_BOVIN Prostaglandin reductase 2 OS=Bos taurus OX=9913 GN=PTGR2 PE=2 SV=1	1	4	4	4	4	3	2	2	2	3	2	1	2	4	0	1	3	3	3	2	4	3	2	2	2	3	2	1	2	4	0	1	3	3	3	2	4	3	2	2	2	3	2	1
sp|Q32LG3|MDHM_BOVIN	sp|Q32LG3|MDHM_BOVIN	30	30	30	>sp|Q32LG3|MDHM_BOVIN Malate dehydrogenase, mitochondrial OS=Bos taurus OX=9913 GN=MDH2 PE=1 SV=1	1	30	30	30	29	27	27	26	28	27	28	28	29	28	22	22	27	27	26	25	29	27	27	26	28	27	28	28	29	28	22	22	27	27	26	25	29	27	27	26	28	27	28	28
sp|Q32LM2|SGTA_BOVIN	sp|Q32LM2|SGTA_BOVIN	7	7	7	>sp|Q32LM2|SGTA_BOVIN Small glutamine-rich tetratricopeptide repeat-containing protein alpha OS=Bos taurus OX=9913 GN=SGTA PE=2 SV=1	1	7	7	7	6	6	7	7	7	7	6	4	7	7	4	5	6	6	6	6	6	6	7	7	7	7	6	4	7	7	4	5	6	6	6	6	6	6	7	7	7	7	6	4
sp|Q32LM6|LIN7A_BOVIN;sp|Q0P5F3|LIN7C_BOVIN;sp|Q2KIB6|LIN7B_BOVIN	sp|Q32LM6|LIN7A_BOVIN;sp|Q0P5F3|LIN7C_BOVIN	6;3;2	6;3;2	6;3;2	>sp|Q32LM6|LIN7A_BOVIN Protein lin-7 homolog A OS=Bos taurus OX=9913 GN=LIN7A PE=2 SV=1;>sp|Q0P5F3|LIN7C_BOVIN Protein lin-7 homolog C OS=Bos taurus OX=9913 GN=LIN7C PE=2 SV=1	3	6	6	6	6	6	5	6	5	5	6	6	6	6	2	2	6	6	6	5	6	6	5	6	5	5	6	6	6	6	2	2	6	6	6	5	6	6	5	6	5	5	6	6
sp|Q32LP2|RADI_BOVIN	sp|Q32LP2|RADI_BOVIN	12	6	6	>sp|Q32LP2|RADI_BOVIN Radixin OS=Bos taurus OX=9913 GN=RDX PE=2 SV=1	1	12	6	6	7	9	12	11	10	10	8	7	7	8	6	6	8	7	6	6	2	3	6	5	4	4	2	1	1	2	1	1	2	1	0	0	2	3	6	5	4	4	2	1
sp|Q32PA4|PHP14_BOVIN	sp|Q32PA4|PHP14_BOVIN	4	4	4	>sp|Q32PA4|PHP14_BOVIN 14 kDa phosphohistidine phosphatase OS=Bos taurus OX=9913 GN=PHPT1 PE=2 SV=1	1	4	4	4	3	3	4	3	4	4	2	2	4	3	1	1	3	3	3	3	3	3	4	3	4	4	2	2	4	3	1	1	3	3	3	3	3	3	4	3	4	4	2	2
sp|Q32PB0|SSBP_BOVIN	sp|Q32PB0|SSBP_BOVIN	6	6	6	>sp|Q32PB0|SSBP_BOVIN Single-stranded DNA-binding protein, mitochondrial OS=Bos taurus OX=9913 GN=SSBP1 PE=2 SV=1	1	6	6	6	5	4	5	5	5	5	5	5	5	5	3	4	5	5	6	6	5	4	5	5	5	5	5	5	5	5	3	4	5	5	6	6	5	4	5	5	5	5	5	5
sp|Q32PD5|RS19_BOVIN	sp|Q32PD5|RS19_BOVIN	6	6	6	>sp|Q32PD5|RS19_BOVIN 40S ribosomal protein S19 OS=Bos taurus OX=9913 GN=RPS19 PE=2 SV=3	1	6	6	6	5	5	6	5	5	4	4	4	5	5	4	4	4	4	4	4	5	5	6	5	5	4	4	4	5	5	4	4	4	4	4	4	5	5	6	5	5	4	4	4
sp|Q32PF2|ACLY_BOVIN	sp|Q32PF2|ACLY_BOVIN	20	20	20	>sp|Q32PF2|ACLY_BOVIN ATP-citrate synthase OS=Bos taurus OX=9913 GN=ACLY PE=2 SV=1	1	20	20	20	17	15	18	13	17	18	16	17	16	15	6	9	16	16	14	16	17	15	18	13	17	18	16	17	16	15	6	9	16	16	14	16	17	15	18	13	17	18	16	17
sp|Q32PH8|EF1A2_BOVIN	sp|Q32PH8|EF1A2_BOVIN	21	21	11	>sp|Q32PH8|EF1A2_BOVIN Elongation factor 1-alpha 2 OS=Bos taurus OX=9913 GN=EEF1A2 PE=2 SV=1	1	21	21	11	21	20	20	21	20	20	20	20	21	20	15	13	20	20	21	18	21	20	20	21	20	20	20	20	21	20	15	13	20	20	21	18	11	11	11	11	11	11	11	11
sp|Q32PI5|2AAA_BOVIN	sp|Q32PI5|2AAA_BOVIN	26	26	26	>sp|Q32PI5|2AAA_BOVIN Serine/threonine-protein phosphatase 2A 65 kDa regulatory subunit A alpha isoform OS=Bos taurus OX=9913 GN=PPP2R1A PE=1 SV=1	1	26	26	26	24	23	21	22	22	24	23	24	23	24	16	17	23	24	22	23	24	23	21	22	22	24	23	24	23	24	16	17	23	24	22	23	24	23	21	22	22	24	23	24
sp|Q3B7M2|GLO2_BOVIN	sp|Q3B7M2|GLO2_BOVIN	10	10	10	>sp|Q3B7M2|GLO2_BOVIN Hydroxyacylglutathione hydrolase, mitochondrial OS=Bos taurus OX=9913 GN=HAGH PE=2 SV=3	1	10	10	10	10	10	10	9	10	10	10	10	9	10	7	6	9	10	9	10	10	10	10	9	10	10	10	10	9	10	7	6	9	10	9	10	10	10	10	9	10	10	10	10
sp|Q3B7M5|LASP1_BOVIN	sp|Q3B7M5|LASP1_BOVIN	13	13	13	>sp|Q3B7M5|LASP1_BOVIN LIM and SH3 domain protein 1 OS=Bos taurus OX=9913 GN=LASP1 PE=2 SV=1	1	13	13	13	11	12	10	11	11	11	9	9	13	12	8	9	12	12	10	11	11	12	10	11	11	11	9	9	13	12	8	9	12	12	10	11	11	12	10	11	11	11	9	9
sp|Q3B7M9|PYGB_BOVIN	sp|Q3B7M9|PYGB_BOVIN	50	50	40	>sp|Q3B7M9|PYGB_BOVIN Glycogen phosphorylase, brain form OS=Bos taurus OX=9913 GN=PYGB PE=2 SV=3	1	50	50	40	46	42	44	43	45	46	44	42	45	45	31	31	41	43	43	44	46	42	44	43	45	46	44	42	45	45	31	31	41	43	43	44	37	34	37	35	37	38	36	34
sp|Q3B7N0|CAD13_BOVIN	sp|Q3B7N0|CAD13_BOVIN	5	5	5	>sp|Q3B7N0|CAD13_BOVIN Cadherin-13 OS=Bos taurus OX=9913 GN=CDH13 PE=2 SV=1	1	5	5	5	2	2	3	4	5	5	3	3	3	5	3	2	4	4	3	2	2	2	3	4	5	5	3	3	3	5	3	2	4	4	3	2	2	2	3	4	5	5	3	3
sp|Q3B7N2|ACTN1_BOVIN	sp|Q3B7N2|ACTN1_BOVIN	53	53	33	>sp|Q3B7N2|ACTN1_BOVIN Alpha-actinin-1 OS=Bos taurus OX=9913 GN=ACTN1 PE=2 SV=1	1	53	53	33	44	44	43	41	44	41	44	45	46	47	37	34	45	44	46	44	44	44	43	41	44	41	44	45	46	47	37	34	45	44	46	44	26	25	24	22	25	24	26	26
sp|Q3MHJ9|KCC2B_BOVIN	sp|Q3MHJ9|KCC2B_BOVIN	28	28	23	>sp|Q3MHJ9|KCC2B_BOVIN Calcium/calmodulin-dependent protein kinase type II subunit beta OS=Bos taurus OX=9913 GN=CAMK2B PE=2 SV=1	1	28	28	23	27	25	24	26	27	25	25	24	27	26	16	16	26	25	25	27	27	25	24	26	27	25	25	24	27	26	16	16	26	25	25	27	22	20	19	21	22	20	20	19
sp|Q3MHK4|CLD11_BOVIN	sp|Q3MHK4|CLD11_BOVIN	4	4	4	>sp|Q3MHK4|CLD11_BOVIN Claudin-11 OS=Bos taurus OX=9913 GN=CLDN11 PE=2 SV=1	1	4	4	4	4	3	4	3	4	3	4	4	4	4	2	3	3	3	4	3	4	3	4	3	4	3	4	4	4	4	2	3	3	3	4	3	4	3	4	3	4	3	4	4
sp|Q3MHL4|SAHH_BOVIN	sp|Q3MHL4|SAHH_BOVIN	14	14	13	>sp|Q3MHL4|SAHH_BOVIN Adenosylhomocysteinase OS=Bos taurus OX=9913 GN=AHCY PE=2 SV=3	1	14	14	13	11	11	13	13	12	11	13	12	14	13	7	9	10	9	11	9	11	11	13	13	12	11	13	12	14	13	7	9	10	9	11	9	10	10	12	12	11	10	12	11
sp|Q3MHL7|TCPZ_BOVIN;sp|Q3T084|TCPW_BOVIN	sp|Q3MHL7|TCPZ_BOVIN	16;6	16;6	16;6	>sp|Q3MHL7|TCPZ_BOVIN T-complex protein 1 subunit zeta OS=Bos taurus OX=9913 GN=CCT6A PE=1 SV=3	2	16	16	16	16	16	16	16	16	16	16	15	16	16	9	11	16	16	16	16	16	16	16	16	16	16	16	15	16	16	9	11	16	16	16	16	16	16	16	16	16	16	16	15
sp|Q3MHM5|TBB4B_BOVIN	sp|Q3MHM5|TBB4B_BOVIN	42	13	2	>sp|Q3MHM5|TBB4B_BOVIN Tubulin beta-4B chain OS=Bos taurus OX=9913 GN=TUBB4B PE=1 SV=1	1	42	13	2	39	38	39	38	39	38	36	38	40	41	34	35	39	39	41	39	13	12	13	13	12	12	13	11	12	13	11	11	13	13	13	12	2	2	2	2	2	2	2	2
sp|Q3MHM6|CTNA1_BOVIN	sp|Q3MHM6|CTNA1_BOVIN	8	8	8	>sp|Q3MHM6|CTNA1_BOVIN Catenin alpha-1 OS=Bos taurus OX=9913 GN=CTNNA1 PE=2 SV=1	1	8	8	8	5	5	6	5	5	6	6	6	6	7	3	2	3	4	7	3	5	5	6	5	5	6	6	6	6	7	3	2	3	4	7	3	5	5	6	5	5	6	6	6
sp|Q3MHN0|PSB6_BOVIN	sp|Q3MHN0|PSB6_BOVIN	6	6	6	>sp|Q3MHN0|PSB6_BOVIN Proteasome subunit beta type-6 OS=Bos taurus OX=9913 GN=PSMB6 PE=1 SV=1	1	6	6	6	6	5	6	6	6	6	6	6	6	6	5	6	6	5	5	5	6	5	6	6	6	6	6	6	6	6	5	6	6	5	5	5	6	5	6	6	6	6	6	6
sp|Q3MHP1|UB2L3_BOVIN	sp|Q3MHP1|UB2L3_BOVIN	6	6	6	>sp|Q3MHP1|UB2L3_BOVIN Ubiquitin-conjugating enzyme E2 L3 OS=Bos taurus OX=9913 GN=UBE2L3 PE=2 SV=1	1	6	6	6	5	6	5	5	5	5	6	6	6	6	2	2	5	5	3	4	5	6	5	5	5	5	6	6	6	6	2	2	5	5	3	4	5	6	5	5	5	5	6	6
sp|Q3MHP2|RB11B_BOVIN;sp|Q2TA29|RB11A_BOVIN;sp|Q58DW6|RAB25_BOVIN	sp|Q3MHP2|RB11B_BOVIN;sp|Q2TA29|RB11A_BOVIN	10;7;1	10;7;1	10;7;1	>sp|Q3MHP2|RB11B_BOVIN Ras-related protein Rab-11B OS=Bos taurus OX=9913 GN=RAB11B PE=2 SV=3;>sp|Q2TA29|RB11A_BOVIN Ras-related protein Rab-11A OS=Bos taurus OX=9913 GN=RAB11A PE=2 SV=3	3	10	10	10	10	9	8	6	8	8	9	8	9	9	4	3	9	9	8	8	10	9	8	6	8	8	9	8	9	9	4	3	9	9	8	8	10	9	8	6	8	8	9	8
sp|Q3MHR3|DYL2_BOVIN	sp|Q3MHR3|DYL2_BOVIN	8	8	5	>sp|Q3MHR3|DYL2_BOVIN Dynein light chain 2, cytoplasmic OS=Bos taurus OX=9913 GN=DYNLL2 PE=3 SV=1	1	8	8	5	6	6	8	8	7	8	6	7	8	8	4	5	7	7	6	7	6	6	8	8	7	8	6	7	8	8	4	5	7	7	6	7	4	4	5	5	4	5	4	5
sp|Q3MHR7|ARPC2_BOVIN	sp|Q3MHR7|ARPC2_BOVIN	7	7	7	>sp|Q3MHR7|ARPC2_BOVIN Actin-related protein 2/3 complex subunit 2 OS=Bos taurus OX=9913 GN=ARPC2 PE=1 SV=1	1	7	7	7	6	5	6	6	6	5	7	7	7	7	4	4	5	6	5	5	6	5	6	6	6	5	7	7	7	7	4	4	5	6	5	5	6	5	6	6	6	5	7	7
sp|Q3MHY1|CSRP1_BOVIN	sp|Q3MHY1|CSRP1_BOVIN	10	10	10	>sp|Q3MHY1|CSRP1_BOVIN Cysteine and glycine-rich protein 1 OS=Bos taurus OX=9913 GN=CSRP1 PE=2 SV=3	1	10	10	10	7	6	8	9	8	7	6	6	8	9	8	7	8	8	8	9	7	6	8	9	8	7	6	6	8	9	8	7	8	8	8	9	7	6	8	9	8	7	6	6
sp|Q3SWW9|PP1B_BOVIN;sp|Q3T0E7|PP1A_BOVIN	sp|Q3SWW9|PP1B_BOVIN;sp|Q3T0E7|PP1A_BOVIN	12;9	12;9	3;0	>sp|Q3SWW9|PP1B_BOVIN Serine/threonine-protein phosphatase PP1-beta catalytic subunit OS=Bos taurus OX=9913 GN=PPP1CB PE=2 SV=1;>sp|Q3T0E7|PP1A_BOVIN Serine/threonine-protein phosphatase PP1-alpha catalytic subunit OS=Bos taurus OX=9913 GN=PPP1CA PE=2 SV=1	2	12	12	3	10	11	9	10	11	11	7	8	11	11	1	3	9	9	8	9	10	11	9	10	11	11	7	8	11	11	1	3	9	9	8	9	3	3	2	2	3	2	2	2
sp|Q3SX44|DDAH2_BOVIN	sp|Q3SX44|DDAH2_BOVIN	8	7	7	>sp|Q3SX44|DDAH2_BOVIN N(G),N(G)-dimethylarginine dimethylaminohydrolase 2 OS=Bos taurus OX=9913 GN=DDAH2 PE=2 SV=1	1	8	7	7	7	7	7	6	6	6	6	7	6	5	6	6	6	7	6	6	6	6	6	5	5	5	5	6	5	4	6	6	5	6	5	5	6	6	6	5	5	5	5	6
sp|Q3SYU2|EF2_BOVIN;sp|A4FUD3|U5S1_BOVIN	sp|Q3SYU2|EF2_BOVIN	29;1	29;1	29;1	>sp|Q3SYU2|EF2_BOVIN Elongation factor 2 OS=Bos taurus OX=9913 GN=EEF2 PE=2 SV=3	2	29	29	29	27	27	27	27	27	25	25	22	28	28	22	19	24	25	27	25	27	27	27	27	27	25	25	22	28	28	22	19	24	25	27	25	27	27	27	27	27	25	25	22
sp|Q3SYV4|CAP1_BOVIN	sp|Q3SYV4|CAP1_BOVIN	22	22	22	>sp|Q3SYV4|CAP1_BOVIN Adenylyl cyclase-associated protein 1 OS=Bos taurus OX=9913 GN=CAP1 PE=2 SV=3	1	22	22	22	20	21	19	20	20	19	19	18	20	21	15	13	18	19	18	18	20	21	19	20	20	19	19	18	20	21	15	13	18	19	18	18	20	21	19	20	20	19	19	18
sp|Q3SYX0|NDRG1_BOVIN	sp|Q3SYX0|NDRG1_BOVIN	8	8	8	>sp|Q3SYX0|NDRG1_BOVIN Protein NDRG1 OS=Bos taurus OX=9913 GN=NDRG1 PE=2 SV=1	1	8	8	8	5	6	8	7	8	7	6	4	7	5	4	4	5	5	3	4	5	6	8	7	8	7	6	4	7	5	4	4	5	5	3	4	5	6	8	7	8	7	6	4
sp|Q3SYZ4|SYDC_BOVIN	sp|Q3SYZ4|SYDC_BOVIN	8	8	8	>sp|Q3SYZ4|SYDC_BOVIN Aspartate--tRNA ligase, cytoplasmic OS=Bos taurus OX=9913 GN=DARS1 PE=2 SV=1	1	8	8	8	5	5	6	4	5	6	6	6	5	5	4	3	4	3	3	4	5	5	6	4	5	6	6	6	5	5	4	3	4	3	3	4	5	5	6	4	5	6	6	6
sp|Q3SZ18|HPRT_BOVIN	sp|Q3SZ18|HPRT_BOVIN	11	11	11	>sp|Q3SZ18|HPRT_BOVIN Hypoxanthine-guanine phosphoribosyltransferase OS=Bos taurus OX=9913 GN=HPRT1 PE=2 SV=3	1	11	11	11	11	11	11	11	11	11	11	11	10	10	10	10	10	10	10	11	11	11	11	11	11	11	11	11	10	10	10	10	10	10	10	11	11	11	11	11	11	11	11	11
sp|Q3SZ43|UB2V2_BOVIN;sp|Q3SZ52|UB2V1_BOVIN	sp|Q3SZ43|UB2V2_BOVIN;sp|Q3SZ52|UB2V1_BOVIN	5;3	5;3	5;3	>sp|Q3SZ43|UB2V2_BOVIN Ubiquitin-conjugating enzyme E2 variant 2 OS=Bos taurus OX=9913 GN=UBE2V2 PE=2 SV=3;>sp|Q3SZ52|UB2V1_BOVIN Ubiquitin-conjugating enzyme E2 variant 1 OS=Bos taurus OX=9913 GN=UBE2V1 PE=2 SV=1	2	5	5	5	4	4	5	5	4	4	4	3	4	5	3	2	4	4	3	4	4	4	5	5	4	4	4	3	4	5	3	2	4	4	3	4	4	4	5	5	4	4	4	3
sp|Q3SZ62|PGAM1_BOVIN;sp|Q32KV0|PGAM2_BOVIN	sp|Q3SZ62|PGAM1_BOVIN	22;6	22;6	22;6	>sp|Q3SZ62|PGAM1_BOVIN Phosphoglycerate mutase 1 OS=Bos taurus OX=9913 GN=PGAM1 PE=2 SV=3	2	22	22	22	21	21	21	20	20	20	22	22	22	22	17	19	21	20	20	21	21	21	21	20	20	20	22	22	22	22	17	19	21	20	20	21	21	21	21	20	20	20	22	22
sp|Q3SZ65|IF4A2_BOVIN;sp|Q3SZ54|IF4A1_BOVIN;sp|Q2NL22|IF4A3_BOVIN	sp|Q3SZ65|IF4A2_BOVIN;sp|Q3SZ54|IF4A1_BOVIN	10;7;1	10;7;1	10;7;1	>sp|Q3SZ65|IF4A2_BOVIN Eukaryotic initiation factor 4A-II OS=Bos taurus OX=9913 GN=EIF4A2 PE=2 SV=1;>sp|Q3SZ54|IF4A1_BOVIN Eukaryotic initiation factor 4A-I OS=Bos taurus OX=9913 GN=EIF4A1 PE=2 SV=1	3	10	10	10	9	9	8	8	9	10	9	9	9	9	7	6	9	9	9	9	9	9	8	8	9	10	9	9	9	9	7	6	9	9	9	9	9	9	8	8	9	10	9	9
sp|Q3SZ73|ABHDB_BOVIN	sp|Q3SZ73|ABHDB_BOVIN	14	14	14	>sp|Q3SZ73|ABHDB_BOVIN Protein ABHD11 OS=Bos taurus OX=9913 GN=ABHD11 PE=2 SV=1	1	14	14	14	13	11	11	9	12	10	13	13	14	14	5	5	12	10	10	11	13	11	11	9	12	10	13	13	14	14	5	5	12	10	10	11	13	11	11	9	12	10	13	13
sp|Q3SZA0|CSN4_BOVIN	sp|Q3SZA0|CSN4_BOVIN	11	11	11	>sp|Q3SZA0|CSN4_BOVIN COP9 signalosome complex subunit 4 OS=Bos taurus OX=9913 GN=COPS4 PE=2 SV=1	1	11	11	11	8	8	9	9	9	10	10	10	9	9	4	2	10	9	10	6	8	8	9	9	9	10	10	10	9	9	4	2	10	9	10	6	8	8	9	9	9	10	10	10
sp|Q3SZC4|NSF1C_BOVIN	sp|Q3SZC4|NSF1C_BOVIN	9	9	9	>sp|Q3SZC4|NSF1C_BOVIN NSFL1 cofactor p47 OS=Bos taurus OX=9913 GN=NSFL1C PE=2 SV=1	1	9	9	9	8	9	8	8	8	9	9	8	9	9	3	5	7	9	7	8	8	9	8	8	8	9	9	8	9	9	3	5	7	9	7	8	8	9	8	8	8	9	9	8
sp|Q3SZF0|ACBD7_BOVIN	sp|Q3SZF0|ACBD7_BOVIN	9	9	9	>sp|Q3SZF0|ACBD7_BOVIN Acyl-CoA-binding domain-containing protein 7 OS=Bos taurus OX=9913 GN=ACBD7 PE=3 SV=1	1	9	9	9	8	8	7	7	8	7	8	8	7	8	9	9	9	9	8	8	8	8	7	7	8	7	8	8	7	8	9	9	9	9	8	8	8	8	7	7	8	7	8	8
sp|Q3SZF2|ARF4_BOVIN	sp|Q3SZF2|ARF4_BOVIN	9	5	5	>sp|Q3SZF2|ARF4_BOVIN ADP-ribosylation factor 4 OS=Bos taurus OX=9913 GN=ARF4 PE=2 SV=3	1	9	5	5	8	7	7	7	7	8	8	8	8	8	2	2	5	6	8	7	4	4	3	4	4	4	4	4	4	4	1	1	2	2	4	3	4	4	3	4	4	4	4	4
sp|Q3SZI4|1433T_BOVIN	sp|Q3SZI4|1433T_BOVIN	21	15	15	>sp|Q3SZI4|1433T_BOVIN 14-3-3 protein theta OS=Bos taurus OX=9913 GN=YWHAQ PE=1 SV=1	1	21	15	15	21	20	20	21	21	21	21	21	21	20	16	16	20	21	20	20	15	14	15	15	15	15	15	15	15	14	12	12	14	15	14	14	15	14	15	15	15	15	15	15
sp|Q3SZI8|IVD_BOVIN	sp|Q3SZI8|IVD_BOVIN	8	8	8	>sp|Q3SZI8|IVD_BOVIN Isovaleryl-CoA dehydrogenase, mitochondrial OS=Bos taurus OX=9913 GN=IVD PE=2 SV=1	1	8	8	8	6	8	8	8	8	8	7	8	8	8	4	4	6	8	7	7	6	8	8	8	8	8	7	8	8	8	4	4	6	8	7	7	6	8	8	8	8	8	7	8
sp|Q3SZJ4|PTGR1_BOVIN	sp|Q3SZJ4|PTGR1_BOVIN	7	7	7	>sp|Q3SZJ4|PTGR1_BOVIN Prostaglandin reductase 1 OS=Bos taurus OX=9913 GN=PTGR1 PE=2 SV=1	1	7	7	7	2	2	1	1	0	0	6	6	1	3	6	6	7	5	7	7	2	2	1	1	0	0	6	6	1	3	6	6	7	5	7	7	2	2	1	1	0	0	6	6
sp|Q3SZK8|NHRF1_BOVIN	sp|Q3SZK8|NHRF1_BOVIN	11	11	11	>sp|Q3SZK8|NHRF1_BOVIN Na(+)/H(+) exchange regulatory cofactor NHE-RF1 OS=Bos taurus OX=9913 GN=SLC9A3R1 PE=2 SV=1	1	11	11	11	8	7	9	9	9	9	9	10	8	9	6	6	8	8	9	8	8	7	9	9	9	9	9	10	8	9	6	6	8	8	9	8	8	7	9	9	9	9	9	10
sp|Q3SZN0|SEPT6_BOVIN	sp|Q3SZN0|SEPT6_BOVIN	20	8	8	>sp|Q3SZN0|SEPT6_BOVIN Septin-6 OS=Bos taurus OX=9913 GN=SEPTIN6 PE=2 SV=1	1	20	8	8	18	18	18	18	17	18	19	18	19	19	14	15	18	16	19	20	8	8	7	8	8	8	8	7	8	8	4	5	7	6	8	8	8	8	7	8	8	8	8	7
sp|Q3SZP2|MARE2_BOVIN	sp|Q3SZP2|MARE2_BOVIN	11	11	11	>sp|Q3SZP2|MARE2_BOVIN Microtubule-associated protein RP/EB family member 2 OS=Bos taurus OX=9913 GN=MAPRE2 PE=2 SV=1	1	11	11	11	10	10	9	10	9	10	11	11	10	11	8	7	10	10	8	9	10	10	9	10	9	10	11	11	10	11	8	7	10	10	8	9	10	10	9	10	9	10	11	11
sp|Q3SZR8|SRSF3_BOVIN	sp|Q3SZR8|SRSF3_BOVIN	4	4	4	>sp|Q3SZR8|SRSF3_BOVIN Serine/arginine-rich splicing factor 3 OS=Bos taurus OX=9913 GN=SRSF3 PE=2 SV=1	1	4	4	4	4	3	3	4	4	4	4	4	4	4	3	2	4	2	4	4	4	3	3	4	4	4	4	4	4	4	3	2	4	2	4	4	4	3	3	4	4	4	4	4
sp|Q3SZV3|EF1G_BOVIN	sp|Q3SZV3|EF1G_BOVIN	8	8	8	>sp|Q3SZV3|EF1G_BOVIN Elongation factor 1-gamma OS=Bos taurus OX=9913 GN=EEF1G PE=2 SV=1	1	8	8	8	8	7	6	6	7	8	8	7	7	8	4	4	7	8	7	6	8	7	6	6	7	8	8	7	7	8	4	4	7	8	7	6	8	7	6	6	7	8	8	7
sp|Q3SZX4|CAH3_BOVIN	sp|Q3SZX4|CAH3_BOVIN	20	20	20	>sp|Q3SZX4|CAH3_BOVIN Carbonic anhydrase 3 OS=Bos taurus OX=9913 GN=CA3 PE=2 SV=3	1	20	20	20	20	19	20	20	20	19	19	20	20	20	18	18	20	19	19	20	20	19	20	20	20	19	19	20	20	20	18	18	20	19	19	20	20	19	20	20	20	19	19	20
sp|Q3T030|PRS6B_BOVIN	sp|Q3T030|PRS6B_BOVIN	4	4	4	>sp|Q3T030|PRS6B_BOVIN 26S proteasome regulatory subunit 6B OS=Bos taurus OX=9913 GN=PSMC4 PE=2 SV=1	1	4	4	4	4	4	3	3	2	4	3	4	3	3	3	2	4	4	2	2	4	4	3	3	2	4	3	4	3	3	3	2	4	4	2	2	4	4	3	3	2	4	3	4
sp|Q3T035|ARPC3_BOVIN	sp|Q3T035|ARPC3_BOVIN	6	6	6	>sp|Q3T035|ARPC3_BOVIN Actin-related protein 2/3 complex subunit 3 OS=Bos taurus OX=9913 GN=ARPC3 PE=1 SV=3	1	6	6	6	6	6	6	6	6	6	6	6	6	6	5	5	6	6	6	6	6	6	6	6	6	6	6	6	6	6	5	5	6	6	6	6	6	6	6	6	6	6	6	6
sp|Q3T054|RAN_BOVIN	sp|Q3T054|RAN_BOVIN	12	12	12	>sp|Q3T054|RAN_BOVIN GTP-binding nuclear protein Ran OS=Bos taurus OX=9913 GN=RAN PE=2 SV=3	1	12	12	12	12	11	12	12	12	12	11	10	12	12	8	7	12	11	12	11	12	11	12	12	12	12	11	10	12	12	8	7	12	11	12	11	12	11	12	12	12	12	11	10
sp|Q3T061|COX7R_BOVIN	sp|Q3T061|COX7R_BOVIN	4	4	4	>sp|Q3T061|COX7R_BOVIN Cytochrome c oxidase subunit 7A-related protein, mitochondrial OS=Bos taurus OX=9913 GN=COX7A2L PE=3 SV=1	1	4	4	4	4	3	4	4	4	4	4	4	4	4	3	3	4	3	4	4	4	3	4	4	4	4	4	4	4	4	3	3	4	3	4	4	4	3	4	4	4	4	4	4
sp|Q3T067|SCPDL_BOVIN	sp|Q3T067|SCPDL_BOVIN	8	8	8	>sp|Q3T067|SCPDL_BOVIN Saccharopine dehydrogenase-like oxidoreductase OS=Bos taurus OX=9913 GN=SCCPDH PE=2 SV=1	1	8	8	8	7	6	6	7	7	6	6	6	6	6	2	2	5	7	6	6	7	6	6	7	7	6	6	6	6	6	2	2	5	7	6	6	7	6	6	7	7	6	6	6
sp|Q3T087|RL11_BOVIN	sp|Q3T087|RL11_BOVIN	4	4	4	>sp|Q3T087|RL11_BOVIN 60S ribosomal protein L11 OS=Bos taurus OX=9913 GN=RPL11 PE=2 SV=3	1	4	4	4	2	2	2	3	3	3	2	2	2	2	3	3	2	3	3	2	2	2	2	3	3	3	2	2	2	2	3	3	2	3	3	2	2	2	2	3	3	3	2	2
sp|Q3T093|NECP1_BOVIN	sp|Q3T093|NECP1_BOVIN	6	6	6	>sp|Q3T093|NECP1_BOVIN Adaptin ear-binding coat-associated protein 1 OS=Bos taurus OX=9913 GN=NECAP1 PE=2 SV=1	1	6	6	6	5	3	3	3	4	5	5	3	5	5	1	2	4	5	4	5	5	3	3	3	4	5	5	3	5	5	1	2	4	5	4	5	5	3	3	3	4	5	5	3
sp|Q3T0C7|STMN1_BOVIN;sp|A4IFK9|STMN3_BOVIN	sp|Q3T0C7|STMN1_BOVIN	19;1	19;1	19;1	>sp|Q3T0C7|STMN1_BOVIN Stathmin OS=Bos taurus OX=9913 GN=STMN1 PE=2 SV=3	2	19	19	19	17	16	18	19	17	17	18	16	17	17	10	11	18	18	18	19	17	16	18	19	17	17	18	16	17	17	10	11	18	18	18	19	17	16	18	19	17	17	18	16
sp|Q3T0D0|HNRPK_BOVIN	sp|Q3T0D0|HNRPK_BOVIN	16	16	16	>sp|Q3T0D0|HNRPK_BOVIN Heterogeneous nuclear ribonucleoprotein K OS=Bos taurus OX=9913 GN=HNRNPK PE=2 SV=1	1	16	16	16	13	14	15	12	15	14	14	15	14	15	13	12	13	15	13	12	13	14	15	12	15	14	14	15	14	15	13	12	13	15	13	12	13	14	15	12	15	14	14	15
sp|Q3T0D7|SAR1A_BOVIN	sp|Q3T0D7|SAR1A_BOVIN	5	5	3	>sp|Q3T0D7|SAR1A_BOVIN GTP-binding protein SAR1a OS=Bos taurus OX=9913 GN=SAR1A PE=2 SV=1	1	5	5	3	4	3	4	4	5	4	3	5	5	4	3	1	5	3	4	3	4	3	4	4	5	4	3	5	5	4	3	1	5	3	4	3	2	2	3	3	3	3	2	3
sp|Q3T0E0|ATOX1_BOVIN	sp|Q3T0E0|ATOX1_BOVIN	4	4	4	>sp|Q3T0E0|ATOX1_BOVIN Copper transport protein ATOX1 OS=Bos taurus OX=9913 GN=ATOX1 PE=3 SV=1	1	4	4	4	3	3	4	4	4	4	3	3	4	4	2	3	4	4	4	4	3	3	4	4	4	4	3	3	4	4	2	3	4	4	4	4	3	3	4	4	4	4	3	3
sp|Q3T0E5|APMAP_BOVIN	sp|Q3T0E5|APMAP_BOVIN	4	4	4	>sp|Q3T0E5|APMAP_BOVIN Adipocyte plasma membrane-associated protein OS=Bos taurus OX=9913 GN=APMAP PE=2 SV=1	1	4	4	4	3	3	1	2	4	3	3	4	3	3	3	3	3	3	2	2	3	3	1	2	4	3	3	4	3	3	3	3	3	3	2	2	3	3	1	2	4	3	3	4
sp|Q3T0F5|RAB7A_BOVIN	sp|Q3T0F5|RAB7A_BOVIN	8	8	8	>sp|Q3T0F5|RAB7A_BOVIN Ras-related protein Rab-7a OS=Bos taurus OX=9913 GN=RAB7A PE=2 SV=1	1	8	8	8	6	6	8	7	8	7	8	7	7	7	3	5	6	7	6	6	6	6	8	7	8	7	8	7	7	7	3	5	6	7	6	6	6	6	8	7	8	7	8	7
sp|Q3T0F7|MTPN_BOVIN	sp|Q3T0F7|MTPN_BOVIN	5	5	5	>sp|Q3T0F7|MTPN_BOVIN Myotrophin OS=Bos taurus OX=9913 GN=MTPN PE=1 SV=3	1	5	5	5	5	5	5	5	4	4	4	5	5	5	3	3	5	5	5	5	5	5	5	5	4	4	4	5	5	5	3	3	5	5	5	5	5	5	5	5	4	4	4	5
sp|Q3T0G5|PLPHP_BOVIN	sp|Q3T0G5|PLPHP_BOVIN	6	6	6	>sp|Q3T0G5|PLPHP_BOVIN Pyridoxal phosphate homeostasis protein OS=Bos taurus OX=9913 GN=PLPBP PE=2 SV=1	1	6	6	6	4	4	6	6	5	6	5	5	6	5	5	4	5	6	4	4	4	4	6	6	5	6	5	5	6	5	5	4	5	6	4	4	4	4	6	6	5	6	5	5
sp|Q3T0G8|SYUA_BOVIN	sp|Q3T0G8|SYUA_BOVIN	15	15	11	>sp|Q3T0G8|SYUA_BOVIN Alpha-synuclein OS=Bos taurus OX=9913 GN=SNCA PE=2 SV=1	1	15	15	11	15	15	15	14	15	15	15	15	15	15	15	14	15	15	15	15	15	15	15	14	15	15	15	15	15	15	15	14	15	15	15	15	11	11	11	10	11	11	11	11
sp|Q3T0K2|TCPG_BOVIN	sp|Q3T0K2|TCPG_BOVIN	26	26	26	>sp|Q3T0K2|TCPG_BOVIN T-complex protein 1 subunit gamma OS=Bos taurus OX=9913 GN=CCT3 PE=1 SV=1	1	26	26	26	19	19	20	21	25	22	22	20	24	24	9	7	21	20	20	21	19	19	20	21	25	22	22	20	24	24	9	7	21	20	20	21	19	19	20	21	25	22	22	20
sp|Q3T0M7|RANG_BOVIN	sp|Q3T0M7|RANG_BOVIN	4	4	4	>sp|Q3T0M7|RANG_BOVIN Ran-specific GTPase-activating protein OS=Bos taurus OX=9913 GN=RANBP1 PE=2 SV=1	1	4	4	4	3	3	2	3	2	3	3	3	4	3	1	2	2	2	3	4	3	3	2	3	2	3	3	3	4	3	1	2	2	2	3	4	3	3	2	3	2	3	3	3
sp|Q3T0P6|PGK1_BOVIN	sp|Q3T0P6|PGK1_BOVIN	36	36	36	>sp|Q3T0P6|PGK1_BOVIN Phosphoglycerate kinase 1 OS=Bos taurus OX=9913 GN=PGK1 PE=2 SV=3	1	36	36	36	35	34	34	33	35	34	34	35	36	36	28	28	34	34	34	33	35	34	34	33	35	34	34	35	36	36	28	28	34	34	34	33	35	34	34	33	35	34	34	35
sp|Q3T0Q4|NDKB_BOVIN;sp|P52174|NDKA1_BOVIN	sp|Q3T0Q4|NDKB_BOVIN	9;3	9;3	6;0	>sp|Q3T0Q4|NDKB_BOVIN Nucleoside diphosphate kinase B OS=Bos taurus OX=9913 GN=NME2 PE=1 SV=1	2	9	9	6	8	9	9	9	9	9	9	9	9	9	8	8	8	8	8	9	8	9	9	9	9	9	9	9	9	9	8	8	8	8	8	9	5	6	6	6	6	6	6	6
sp|Q3T0R1|RS18_BOVIN	sp|Q3T0R1|RS18_BOVIN	4	4	4	>sp|Q3T0R1|RS18_BOVIN 40S ribosomal protein S18 OS=Bos taurus OX=9913 GN=RPS18 PE=2 SV=3	1	4	4	4	3	4	4	4	4	4	3	4	4	4	3	2	4	4	4	4	3	4	4	4	4	4	3	4	4	4	3	2	4	4	4	4	3	4	4	4	4	4	3	4
sp|Q3T0S6|RL8_BOVIN	sp|Q3T0S6|RL8_BOVIN	4	4	4	>sp|Q3T0S6|RL8_BOVIN 60S ribosomal protein L8 OS=Bos taurus OX=9913 GN=RPL8 PE=1 SV=3	1	4	4	4	3	3	3	4	3	3	4	4	4	3	3	2	3	4	4	3	3	3	3	4	3	3	4	4	4	3	3	2	3	4	4	3	3	3	3	4	3	3	4	4
sp|Q3T0T5|JUPI1_BOVIN	sp|Q3T0T5|JUPI1_BOVIN	4	4	4	>sp|Q3T0T5|JUPI1_BOVIN Jupiter microtubule associated homolog 1 OS=Bos taurus OX=9913 GN=JPT1 PE=2 SV=3	1	4	4	4	2	3	3	2	3	3	3	4	4	3	2	2	3	3	3	4	2	3	3	2	3	3	3	4	4	3	2	2	3	3	3	4	2	3	3	2	3	3	3	4
sp|Q3T0W4|PP1R7_BOVIN	sp|Q3T0W4|PP1R7_BOVIN	6	6	6	>sp|Q3T0W4|PP1R7_BOVIN Protein phosphatase 1 regulatory subunit 7 OS=Bos taurus OX=9913 GN=PPP1R7 PE=1 SV=1	1	6	6	6	6	6	6	6	6	6	6	6	6	6	1	1	6	6	6	6	6	6	6	6	6	6	6	6	6	6	1	1	6	6	6	6	6	6	6	6	6	6	6	6
sp|Q3T0X5|PSA1_BOVIN	sp|Q3T0X5|PSA1_BOVIN	4	4	4	>sp|Q3T0X5|PSA1_BOVIN Proteasome subunit alpha type-1 OS=Bos taurus OX=9913 GN=PSMA1 PE=1 SV=1	1	4	4	4	4	4	3	2	4	4	4	4	4	4	3	4	4	4	4	4	4	4	3	2	4	4	4	4	4	4	3	4	4	4	4	4	4	4	3	2	4	4	4	4
sp|Q3T0Z7|DHPR_BOVIN	sp|Q3T0Z7|DHPR_BOVIN	11	11	11	>sp|Q3T0Z7|DHPR_BOVIN Dihydropteridine reductase OS=Bos taurus OX=9913 GN=QDPR PE=2 SV=1	1	11	11	11	10	11	11	11	11	11	11	10	11	11	9	9	10	9	10	10	10	11	11	11	11	11	11	10	11	11	9	9	10	9	10	10	10	11	11	11	11	11	11	10
sp|Q3T100|MGST3_BOVIN	sp|Q3T100|MGST3_BOVIN	6	6	6	>sp|Q3T100|MGST3_BOVIN Microsomal glutathione S-transferase 3 OS=Bos taurus OX=9913 GN=MGST3 PE=2 SV=1	1	6	6	6	6	6	5	3	5	5	4	4	6	6	1	1	5	6	6	6	6	6	5	3	5	5	4	4	6	6	1	1	5	6	6	6	6	6	5	3	5	5	4	4
sp|Q3T114|RIDA_BOVIN	sp|Q3T114|RIDA_BOVIN	8	8	8	>sp|Q3T114|RIDA_BOVIN 2-iminobutanoate/2-iminopropanoate deaminase OS=Bos taurus OX=9913 GN=RIDA PE=2 SV=3	1	8	8	8	7	7	7	7	7	7	8	8	5	8	6	6	7	7	7	7	7	7	7	7	7	7	8	8	5	8	6	6	7	7	7	7	7	7	7	7	7	7	8	8
sp|Q3T140|DLRB1_BOVIN	sp|Q3T140|DLRB1_BOVIN	4	4	4	>sp|Q3T140|DLRB1_BOVIN Dynein light chain roadblock-type 1 OS=Bos taurus OX=9913 GN=DYNLRB1 PE=3 SV=1	1	4	4	4	4	4	2	4	4	4	3	3	4	4	2	2	4	4	3	3	4	4	2	4	4	4	3	3	4	4	2	2	4	4	3	3	4	4	2	4	4	4	3	3
sp|Q3T145|MDHC_BOVIN	sp|Q3T145|MDHC_BOVIN	26	26	26	>sp|Q3T145|MDHC_BOVIN Malate dehydrogenase, cytoplasmic OS=Bos taurus OX=9913 GN=MDH1 PE=2 SV=3	1	26	26	26	25	25	22	23	25	25	24	25	25	24	20	20	25	26	25	23	25	25	22	23	25	25	24	25	25	24	20	20	25	26	25	23	25	25	22	23	25	25	24	25
sp|Q3T149|HSPB1_BOVIN	sp|Q3T149|HSPB1_BOVIN	22	22	22	>sp|Q3T149|HSPB1_BOVIN Heat shock protein beta-1 OS=Bos taurus OX=9913 GN=HSPB1 PE=2 SV=1	1	22	22	22	18	18	19	20	19	19	19	19	20	19	21	21	18	19	20	21	18	18	19	20	19	19	19	19	20	19	21	21	18	19	20	21	18	18	19	20	19	19	19	19
sp|Q3T160|NPM_BOVIN	sp|Q3T160|NPM_BOVIN	5	5	5	>sp|Q3T160|NPM_BOVIN Nucleophosmin OS=Bos taurus OX=9913 GN=NPM1 PE=2 SV=1	1	5	5	5	4	5	5	5	5	5	4	5	5	5	1	2	5	3	2	3	4	5	5	5	5	5	4	5	5	5	1	2	5	3	2	3	4	5	5	5	5	5	4	5
sp|Q3T165|PHB1_BOVIN	sp|Q3T165|PHB1_BOVIN	15	15	15	>sp|Q3T165|PHB1_BOVIN Prohibitin 1 OS=Bos taurus OX=9913 GN=PHB1 PE=2 SV=1	1	15	15	15	15	15	15	15	13	15	15	15	15	15	13	13	15	15	14	14	15	15	15	15	13	15	15	15	15	15	13	13	15	15	14	14	15	15	15	15	13	15	15	15
sp|Q3T168|CYBP_BOVIN	sp|Q3T168|CYBP_BOVIN	11	11	11	>sp|Q3T168|CYBP_BOVIN Calcyclin-binding protein OS=Bos taurus OX=9913 GN=CACYBP PE=2 SV=1	1	11	11	11	8	8	9	6	8	8	8	7	7	7	6	7	8	8	8	7	8	8	9	6	8	8	8	7	7	7	6	7	8	8	8	7	8	8	9	6	8	8	8	7
sp|Q3T169|RS3_BOVIN	sp|Q3T169|RS3_BOVIN	7	7	7	>sp|Q3T169|RS3_BOVIN 40S ribosomal protein S3 OS=Bos taurus OX=9913 GN=RPS3 PE=2 SV=1	1	7	7	7	5	7	4	6	5	6	4	6	7	7	4	3	7	6	5	7	5	7	4	6	5	6	4	6	7	7	4	3	7	6	5	7	5	7	4	6	5	6	4	6
sp|Q3T189|SDHB_BOVIN	sp|Q3T189|SDHB_BOVIN	8	8	8	>sp|Q3T189|SDHB_BOVIN Succinate dehydrogenase [ubiquinone] iron-sulfur subunit, mitochondrial OS=Bos taurus OX=9913 GN=SDHB PE=2 SV=1	1	8	8	8	7	5	6	6	7	6	6	6	8	7	4	4	6	7	5	5	7	5	6	6	7	6	6	6	8	7	4	4	6	7	5	5	7	5	6	6	7	6	6	6
sp|Q3ZBA8|NDRG2_BOVIN	sp|Q3ZBA8|NDRG2_BOVIN	16	16	16	>sp|Q3ZBA8|NDRG2_BOVIN Protein NDRG2 OS=Bos taurus OX=9913 GN=NDRG2 PE=2 SV=1	1	16	16	16	15	13	14	14	15	15	15	14	15	16	12	11	15	15	15	15	15	13	14	14	15	15	15	14	15	16	12	11	15	15	15	15	15	13	14	14	15	15	15	14
sp|Q3ZBD3|PHS_BOVIN	sp|Q3ZBD3|PHS_BOVIN	5	5	5	>sp|Q3ZBD3|PHS_BOVIN Pterin-4-alpha-carbinolamine dehydratase OS=Bos taurus OX=9913 GN=PCBD1 PE=3 SV=2	1	5	5	5	4	4	4	4	5	4	4	5	4	4	5	5	4	4	4	4	4	4	4	4	5	4	4	5	4	4	5	5	4	4	4	4	4	4	4	4	5	4	4	5
sp|Q3ZBD7|G6PI_BOVIN;CON__Q3ZBD7	sp|Q3ZBD7|G6PI_BOVIN;CON__Q3ZBD7	30;29	30;29	30;29	>sp|Q3ZBD7|G6PI_BOVIN Glucose-6-phosphate isomerase OS=Bos taurus OX=9913 GN=GPI PE=2 SV=4;>Q3ZBD7 SWISS-PROT:Q3ZBD7 (Bos taurus) Glucose-6-phosphate isomerase	2	30	30	30	27	27	26	27	28	28	28	27	27	28	22	22	28	27	27	26	27	27	26	27	28	28	28	27	27	28	22	22	28	27	27	26	27	27	26	27	28	28	28	27
sp|Q3ZBD9|MARE1_BOVIN	sp|Q3ZBD9|MARE1_BOVIN	7	7	7	>sp|Q3ZBD9|MARE1_BOVIN Microtubule-associated protein RP/EB family member 1 OS=Bos taurus OX=9913 GN=MAPRE1 PE=2 SV=3	1	7	7	7	5	6	6	6	7	7	6	6	5	7	4	5	4	6	4	5	5	6	6	6	7	7	6	6	5	7	4	5	4	6	4	5	5	6	6	6	7	7	6	6
sp|Q3ZBF6|ACADS_BOVIN	sp|Q3ZBF6|ACADS_BOVIN	5	5	5	>sp|Q3ZBF6|ACADS_BOVIN Short-chain specific acyl-CoA dehydrogenase, mitochondrial OS=Bos taurus OX=9913 GN=ACADS PE=1 SV=1	1	5	5	5	3	4	4	5	3	3	5	5	4	5	2	2	3	3	3	4	3	4	4	5	3	3	5	5	4	5	2	2	3	3	3	4	3	4	4	5	3	3	5	5
sp|Q3ZBF7|TEBP_BOVIN	sp|Q3ZBF7|TEBP_BOVIN	5	5	5	>sp|Q3ZBF7|TEBP_BOVIN Prostaglandin E synthase 3 OS=Bos taurus OX=9913 GN=PTGES3 PE=1 SV=1	1	5	5	5	4	4	5	5	4	5	5	5	5	5	2	2	4	5	5	5	4	4	5	5	4	5	5	5	5	5	2	2	4	5	5	5	4	4	5	5	4	5	5	5
sp|Q3ZBF9|PLPP_BOVIN	sp|Q3ZBF9|PLPP_BOVIN	6	6	6	>sp|Q3ZBF9|PLPP_BOVIN Chronophin OS=Bos taurus OX=9913 GN=PDXP PE=1 SV=1	1	6	6	6	6	5	6	6	5	5	4	6	6	5	3	3	4	6	6	6	6	5	6	6	5	5	4	6	6	5	3	3	4	6	6	6	6	5	6	6	5	5	4	6
sp|Q3ZBG0|PSA7_BOVIN	sp|Q3ZBG0|PSA7_BOVIN	8	8	8	>sp|Q3ZBG0|PSA7_BOVIN Proteasome subunit alpha type-7 OS=Bos taurus OX=9913 GN=PSMA7 PE=1 SV=1	1	8	8	8	7	7	5	8	7	8	7	8	8	8	5	5	7	7	6	7	7	7	5	8	7	8	7	8	8	8	5	5	7	7	6	7	7	7	5	8	7	8	7	8
sp|Q3ZBH0|TCPB_BOVIN	sp|Q3ZBH0|TCPB_BOVIN	23	23	23	>sp|Q3ZBH0|TCPB_BOVIN T-complex protein 1 subunit beta OS=Bos taurus OX=9913 GN=CCT2 PE=1 SV=3	1	23	23	23	21	19	17	19	19	19	21	19	21	21	14	13	20	18	20	16	21	19	17	19	19	19	21	19	21	21	14	13	20	18	20	16	21	19	17	19	19	19	21	19
sp|Q3ZBK2|PXL2A_BOVIN	sp|Q3ZBK2|PXL2A_BOVIN	6	6	6	>sp|Q3ZBK2|PXL2A_BOVIN Peroxiredoxin-like 2A OS=Bos taurus OX=9913 GN=PRXL2A PE=2 SV=1	1	6	6	6	4	3	5	5	4	5	4	5	5	6	4	4	3	4	3	4	4	3	5	5	4	5	4	5	5	6	4	4	3	4	3	4	4	3	5	5	4	5	4	5
sp|Q3ZBL4|LZTL1_BOVIN	sp|Q3ZBL4|LZTL1_BOVIN	6	6	6	>sp|Q3ZBL4|LZTL1_BOVIN Leucine zipper transcription factor-like protein 1 OS=Bos taurus OX=9913 GN=LZTFL1 PE=2 SV=1	1	6	6	6	3	3	4	4	4	4	4	4	4	4	2	2	4	4	5	5	3	3	4	4	4	4	4	4	4	4	2	2	4	4	5	5	3	3	4	4	4	4	4	4
sp|Q3ZBR9|ERMIN_BOVIN	sp|Q3ZBR9|ERMIN_BOVIN	6	6	6	>sp|Q3ZBR9|ERMIN_BOVIN Ermin OS=Bos taurus OX=9913 GN=ERMN PE=2 SV=1	1	6	6	6	2	2	4	4	6	6	4	2	3	4	2	3	3	2	1	2	2	2	4	4	6	6	4	2	3	4	2	3	3	2	1	2	2	2	4	4	6	6	4	2
sp|Q3ZBT1|TERA_BOVIN	sp|Q3ZBT1|TERA_BOVIN	36	36	36	>sp|Q3ZBT1|TERA_BOVIN Transitional endoplasmic reticulum ATPase OS=Bos taurus OX=9913 GN=VCP PE=2 SV=1	1	36	36	36	32	31	32	33	34	34	31	32	34	34	25	21	33	34	33	32	32	31	32	33	34	34	31	32	34	34	25	21	33	34	33	32	32	31	32	33	34	34	31	32
sp|Q3ZBT5|STX7_BOVIN	sp|Q3ZBT5|STX7_BOVIN	6	6	6	>sp|Q3ZBT5|STX7_BOVIN Syntaxin-7 OS=Bos taurus OX=9913 GN=STX7 PE=2 SV=1	1	6	6	6	5	6	6	6	5	5	6	6	6	6	4	3	6	6	6	6	5	6	6	6	5	5	6	6	6	6	4	3	6	6	6	6	5	6	6	6	5	5	6	6
sp|Q3ZBU2|CISD1_BOVIN	sp|Q3ZBU2|CISD1_BOVIN	6	6	6	>sp|Q3ZBU2|CISD1_BOVIN CDGSH iron-sulfur domain-containing protein 1 OS=Bos taurus OX=9913 GN=CISD1 PE=1 SV=1	1	6	6	6	6	6	6	6	6	6	6	6	6	6	6	5	6	6	6	6	6	6	6	6	6	6	6	6	6	6	6	5	6	6	6	6	6	6	6	6	6	6	6	6
sp|Q3ZBU7|TBB4A_BOVIN	sp|Q3ZBU7|TBB4A_BOVIN	39	9	9	>sp|Q3ZBU7|TBB4A_BOVIN Tubulin beta-4A chain OS=Bos taurus OX=9913 GN=TUBB4A PE=2 SV=1	1	39	9	9	37	36	37	36	36	36	35	36	37	38	33	33	37	37	39	37	9	9	9	9	9	9	9	9	9	9	8	8	9	9	9	9	9	9	9	9	9	9	9	9
sp|Q3ZBV8|SYTC_BOVIN	sp|Q3ZBV8|SYTC_BOVIN	8	8	8	>sp|Q3ZBV8|SYTC_BOVIN Threonine--tRNA ligase 1, cytoplasmic OS=Bos taurus OX=9913 GN=TARS1 PE=2 SV=1	1	8	8	8	7	6	7	7	6	8	6	7	6	7	3	4	7	7	7	5	7	6	7	7	6	8	6	7	6	7	3	4	7	7	7	5	7	6	7	7	6	8	6	7
sp|Q3ZBW5|RHOB_BOVIN	sp|Q3ZBW5|RHOB_BOVIN	11	9	8	>sp|Q3ZBW5|RHOB_BOVIN Rho-related GTP-binding protein RhoB OS=Bos taurus OX=9913 GN=RHOB PE=2 SV=1	1	11	9	8	9	9	11	11	8	11	8	8	11	11	5	5	8	9	9	9	8	8	9	9	7	9	6	7	9	9	4	4	7	8	8	8	7	7	8	8	7	8	6	6
sp|Q3ZBY2|TAGL3_BOVIN	sp|Q3ZBY2|TAGL3_BOVIN	16	16	15	>sp|Q3ZBY2|TAGL3_BOVIN Transgelin-3 OS=Bos taurus OX=9913 GN=TAGLN3 PE=2 SV=1	1	16	16	15	14	15	15	16	14	16	15	15	14	13	12	12	15	14	15	15	14	15	15	16	14	16	15	15	14	13	12	12	15	14	15	15	13	14	14	15	13	15	14	14
sp|Q3ZBY3|CALB2_BOVIN;sp|P04467|CALB1_BOVIN	sp|Q3ZBY3|CALB2_BOVIN	9;1	9;1	9;1	>sp|Q3ZBY3|CALB2_BOVIN Calretinin OS=Bos taurus OX=9913 GN=CALB2 PE=2 SV=1	2	9	9	9	2	3	4	3	6	6	3	2	8	8	8	7	9	8	8	8	2	3	4	3	6	6	3	2	8	8	8	7	9	8	8	8	2	3	4	3	6	6	3	2
sp|Q3ZBZ8|STIP1_BOVIN	sp|Q3ZBZ8|STIP1_BOVIN	36	36	36	>sp|Q3ZBZ8|STIP1_BOVIN Stress-induced-phosphoprotein 1 OS=Bos taurus OX=9913 GN=STIP1 PE=2 SV=1	1	36	36	36	33	32	31	33	32	34	33	31	35	34	22	19	33	33	34	34	33	32	31	33	32	34	33	31	35	34	22	19	33	33	34	34	33	32	31	33	32	34	33	31
sp|Q3ZC09|ENOB_BOVIN	sp|Q3ZC09|ENOB_BOVIN	11	4	4	>sp|Q3ZC09|ENOB_BOVIN Beta-enolase OS=Bos taurus OX=9913 GN=ENO3 PE=2 SV=1	1	11	4	4	11	11	11	11	11	11	11	11	11	11	11	11	11	11	11	11	4	4	4	4	4	4	4	4	4	4	4	4	4	4	4	4	4	4	4	4	4	4	4	4
sp|Q3ZC13|AP2M1_BOVIN	sp|Q3ZC13|AP2M1_BOVIN	19	19	19	>sp|Q3ZC13|AP2M1_BOVIN AP-2 complex subunit mu OS=Bos taurus OX=9913 GN=AP2M1 PE=1 SV=1	1	19	19	19	18	18	17	17	18	19	18	19	18	17	8	9	17	17	17	15	18	18	17	17	18	19	18	19	18	17	8	9	17	17	17	15	18	18	17	17	18	19	18	19
sp|Q3ZC42|ADHX_BOVIN	sp|Q3ZC42|ADHX_BOVIN	16	16	16	>sp|Q3ZC42|ADHX_BOVIN Alcohol dehydrogenase class-3 OS=Bos taurus OX=9913 GN=ADH5 PE=2 SV=1	1	16	16	16	14	14	13	11	14	14	13	14	15	15	10	10	16	16	15	15	14	14	13	11	14	14	13	14	15	15	10	10	16	16	15	15	14	14	13	11	14	14	13	14
sp|Q3ZC55|ACTN2_BOVIN	sp|Q3ZC55|ACTN2_BOVIN	33	22	20	>sp|Q3ZC55|ACTN2_BOVIN Alpha-actinin-2 OS=Bos taurus OX=9913 GN=ACTN2 PE=2 SV=1	1	33	22	20	26	29	28	28	30	30	28	29	32	30	18	14	31	30	25	26	17	19	18	18	20	21	19	19	22	20	10	6	20	20	16	17	16	17	16	16	18	19	17	17
sp|Q3ZC84|CNDP2_BOVIN	sp|Q3ZC84|CNDP2_BOVIN	10	10	10	>sp|Q3ZC84|CNDP2_BOVIN Cytosolic non-specific dipeptidase OS=Bos taurus OX=9913 GN=CNDP2 PE=2 SV=1	1	10	10	10	7	9	8	8	9	8	7	6	8	10	6	6	8	10	9	9	7	9	8	8	9	8	7	6	8	10	6	6	8	10	9	9	7	9	8	8	9	8	7	6
sp|Q3ZCC8|TPPP3_BOVIN	sp|Q3ZCC8|TPPP3_BOVIN	4	4	4	>sp|Q3ZCC8|TPPP3_BOVIN Tubulin polymerization-promoting protein family member 3 OS=Bos taurus OX=9913 GN=TPPP3 PE=1 SV=1	1	4	4	4	1	1	4	4	4	3	1	1	3	2	1	1	1	1	3	2	1	1	4	4	4	3	1	1	3	2	1	1	1	1	3	2	1	1	4	4	4	3	1	1
sp|Q3ZCD0|CD81_BOVIN	sp|Q3ZCD0|CD81_BOVIN	4	4	4	>sp|Q3ZCD0|CD81_BOVIN CD81 antigen OS=Bos taurus OX=9913 GN=CD81 PE=2 SV=1	1	4	4	4	3	4	4	4	4	3	3	3	4	4	3	1	4	4	4	4	3	4	4	4	4	3	3	3	4	4	3	1	4	4	4	4	3	4	4	4	4	3	3	3
sp|Q3ZCF0|DCTN2_BOVIN	sp|Q3ZCF0|DCTN2_BOVIN	15	15	15	>sp|Q3ZCF0|DCTN2_BOVIN Dynactin subunit 2 OS=Bos taurus OX=9913 GN=DCTN2 PE=2 SV=1	1	15	15	15	13	14	15	15	13	14	15	14	14	14	11	11	15	14	13	13	13	14	15	15	13	14	15	14	14	14	11	11	15	14	13	13	13	14	15	15	13	14	15	14
sp|Q3ZCF3|SKP1_BOVIN	sp|Q3ZCF3|SKP1_BOVIN	11	11	11	>sp|Q3ZCF3|SKP1_BOVIN S-phase kinase-associated protein 1 OS=Bos taurus OX=9913 GN=SKP1 PE=2 SV=1	1	11	11	11	7	8	9	9	9	9	9	10	10	9	5	6	9	9	8	7	7	8	9	9	9	9	9	10	10	9	5	6	9	9	8	7	7	8	9	9	9	9	9	10
sp|Q3ZCF5|OAT_BOVIN	sp|Q3ZCF5|OAT_BOVIN	13	13	13	>sp|Q3ZCF5|OAT_BOVIN Ornithine aminotransferase, mitochondrial OS=Bos taurus OX=9913 GN=OAT PE=2 SV=1	1	13	13	13	11	10	10	10	11	9	9	10	11	11	1	5	9	8	10	10	11	10	10	10	11	9	9	10	11	11	1	5	9	8	10	10	11	10	10	10	11	9	9	10
sp|Q3ZCH0|GRP75_BOVIN	sp|Q3ZCH0|GRP75_BOVIN	31	31	31	>sp|Q3ZCH0|GRP75_BOVIN Stress-70 protein, mitochondrial OS=Bos taurus OX=9913 GN=HSPA9 PE=2 SV=1	1	31	31	31	30	29	23	25	26	26	30	30	26	25	22	23	26	27	28	27	30	29	23	25	26	26	30	30	26	25	22	23	26	27	28	27	30	29	23	25	26	26	30	30
sp|Q3ZCH9|HDHD2_BOVIN	sp|Q3ZCH9|HDHD2_BOVIN	10	10	10	>sp|Q3ZCH9|HDHD2_BOVIN Haloacid dehalogenase-like hydrolase domain-containing protein 2 OS=Bos taurus OX=9913 GN=HDHD2 PE=2 SV=1	1	10	10	10	10	9	10	8	10	9	10	9	10	10	4	4	10	10	9	9	10	9	10	8	10	9	10	9	10	10	4	4	10	10	9	9	10	9	10	8	10	9	10	9
sp|Q3ZCI9|TCPQ_BOVIN	sp|Q3ZCI9|TCPQ_BOVIN	20	20	20	>sp|Q3ZCI9|TCPQ_BOVIN T-complex protein 1 subunit theta OS=Bos taurus OX=9913 GN=CCT8 PE=1 SV=3	1	20	20	20	12	13	17	16	16	17	16	15	17	17	7	8	16	17	11	17	12	13	17	16	16	17	16	15	17	17	7	8	16	17	11	17	12	13	17	16	16	17	16	15
sp|Q3ZCJ2|AK1A1_BOVIN	sp|Q3ZCJ2|AK1A1_BOVIN	12	12	12	>sp|Q3ZCJ2|AK1A1_BOVIN Aldo-keto reductase family 1 member A1 OS=Bos taurus OX=9913 GN=AKR1A1 PE=2 SV=1	1	12	12	12	11	11	10	10	11	10	11	11	12	12	7	7	12	12	11	11	11	11	10	10	11	10	11	11	12	12	7	7	12	12	11	11	11	11	10	10	11	10	11	11
sp|Q3ZCK3|BPNT1_BOVIN	sp|Q3ZCK3|BPNT1_BOVIN	4	4	4	>sp|Q3ZCK3|BPNT1_BOVIN 3(2),5-bisphosphate nucleotidase 1 OS=Bos taurus OX=9913 GN=BPNT1 PE=2 SV=1	1	4	4	4	4	3	3	3	3	3	4	4	3	3	2	2	3	4	4	4	4	3	3	3	3	3	4	4	3	3	2	2	3	4	4	4	4	3	3	3	3	3	4	4
sp|Q3ZCK9|PSA4_BOVIN	sp|Q3ZCK9|PSA4_BOVIN	4	4	4	>sp|Q3ZCK9|PSA4_BOVIN Proteasome subunit alpha type-4 OS=Bos taurus OX=9913 GN=PSMA4 PE=1 SV=1	1	4	4	4	4	4	4	4	4	4	3	4	4	4	3	2	4	4	4	4	4	4	4	4	4	4	3	4	4	4	3	2	4	4	4	4	4	4	4	4	4	4	3	4
sp|Q3ZCL8|SH3L3_BOVIN	sp|Q3ZCL8|SH3L3_BOVIN	6	6	6	>sp|Q3ZCL8|SH3L3_BOVIN SH3 domain-binding glutamic acid-rich-like protein 3 OS=Bos taurus OX=9913 GN=SH3BGRL3 PE=3 SV=1	1	6	6	6	4	5	5	5	6	5	5	5	6	6	5	5	6	6	5	6	4	5	5	5	6	5	5	5	6	6	5	5	6	6	5	6	4	5	5	5	6	5	5	5
sp|Q56JV9|RS3A_BOVIN	sp|Q56JV9|RS3A_BOVIN	8	8	8	>sp|Q56JV9|RS3A_BOVIN 40S ribosomal protein S3a OS=Bos taurus OX=9913 GN=RPS3A PE=2 SV=3	1	8	8	8	6	7	7	7	7	7	7	7	6	7	4	4	7	7	6	6	6	7	7	7	7	7	7	7	6	7	4	4	7	7	6	6	6	7	7	7	7	7	7	7
sp|Q56JW4|APT_BOVIN	sp|Q56JW4|APT_BOVIN	7	7	7	>sp|Q56JW4|APT_BOVIN Adenine phosphoribosyltransferase OS=Bos taurus OX=9913 GN=APRT PE=2 SV=1	1	7	7	7	4	4	4	2	3	4	5	3	6	6	2	4	5	5	6	6	4	4	4	2	3	4	5	3	6	6	2	4	5	5	6	6	4	4	4	2	3	4	5	3
sp|Q56JX8|RS13_BOVIN	sp|Q56JX8|RS13_BOVIN	4	4	4	>sp|Q56JX8|RS13_BOVIN 40S ribosomal protein S13 OS=Bos taurus OX=9913 GN=RPS13 PE=2 SV=3	1	4	4	4	4	4	3	4	3	4	4	4	4	4	3	2	4	4	3	4	4	4	3	4	3	4	4	4	4	4	3	2	4	4	3	4	4	4	3	4	3	4	4	4
sp|Q56JZ1|RL13_BOVIN	sp|Q56JZ1|RL13_BOVIN	4	4	4	>sp|Q56JZ1|RL13_BOVIN 60S ribosomal protein L13 OS=Bos taurus OX=9913 GN=RPL13 PE=2 SV=3	1	4	4	4	4	3	4	4	2	4	4	3	4	4	3	1	4	4	4	3	4	3	4	4	2	4	4	3	4	4	3	1	4	4	4	3	4	3	4	4	2	4	4	3
sp|Q58CP0|IDH3G_BOVIN	sp|Q58CP0|IDH3G_BOVIN	12	12	12	>sp|Q58CP0|IDH3G_BOVIN Isocitrate dehydrogenase [NAD] subunit gamma, mitochondrial OS=Bos taurus OX=9913 GN=IDH3G PE=2 SV=1	1	12	12	12	12	12	9	10	11	9	11	11	12	12	3	4	10	11	9	9	12	12	9	10	11	9	11	11	12	12	3	4	10	11	9	9	12	12	9	10	11	9	11	11
sp|Q58D08|P5CR3_BOVIN	sp|Q58D08|P5CR3_BOVIN	7	7	7	>sp|Q58D08|P5CR3_BOVIN Pyrroline-5-carboxylate reductase 3 OS=Bos taurus OX=9913 GN=PYCR3 PE=2 SV=1	1	7	7	7	6	6	6	6	6	6	6	4	6	7	5	5	5	7	7	6	6	6	6	6	6	6	6	4	6	7	5	5	5	7	7	6	6	6	6	6	6	6	6	4
sp|Q58D31|DHSO_BOVIN	sp|Q58D31|DHSO_BOVIN	6	6	6	>sp|Q58D31|DHSO_BOVIN Sorbitol dehydrogenase OS=Bos taurus OX=9913 GN=SORD PE=1 SV=3	1	6	6	6	6	5	5	5	4	4	5	5	6	6	4	3	5	5	6	5	6	5	5	5	4	4	5	5	6	6	4	3	5	5	6	5	6	5	5	5	4	4	5	5
sp|Q58D72|ATLA1_BOVIN	sp|Q58D72|ATLA1_BOVIN	18	18	18	>sp|Q58D72|ATLA1_BOVIN Atlastin-1 OS=Bos taurus OX=9913 GN=ATL1 PE=2 SV=2	1	18	18	18	17	13	16	16	16	16	15	15	17	18	5	5	14	15	13	14	17	13	16	16	16	16	15	15	17	18	5	5	14	15	13	14	17	13	16	16	16	16	15	15
sp|Q58DA0|PSMD4_BOVIN	sp|Q58DA0|PSMD4_BOVIN	4	4	4	>sp|Q58DA0|PSMD4_BOVIN 26S proteasome non-ATPase regulatory subunit 4 OS=Bos taurus OX=9913 GN=PSMD4 PE=2 SV=1	1	4	4	4	2	2	4	4	4	4	4	3	4	4	1	1	3	3	4	4	2	2	4	4	4	4	4	3	4	4	1	1	3	3	4	4	2	2	4	4	4	4	4	3
sp|Q58DA5|NTRI_BOVIN	sp|Q58DA5|NTRI_BOVIN	12	8	8	>sp|Q58DA5|NTRI_BOVIN Neurotrimin OS=Bos taurus OX=9913 GN=NTM PE=2 SV=1	1	12	8	8	12	12	10	9	10	10	10	10	12	11	5	6	12	11	11	12	8	8	6	7	7	8	7	7	8	7	4	5	8	7	8	8	8	8	6	7	7	8	7	7
sp|Q58DM8|ECHM_BOVIN	sp|Q58DM8|ECHM_BOVIN	11	11	11	>sp|Q58DM8|ECHM_BOVIN Enoyl-CoA hydratase, mitochondrial OS=Bos taurus OX=9913 GN=ECHS1 PE=2 SV=1	1	11	11	11	10	10	9	8	6	9	10	9	10	11	6	7	10	9	10	8	10	10	9	8	6	9	10	9	10	11	6	7	10	9	10	8	10	10	9	8	6	9	10	9
sp|Q58DN4|PPME1_BOVIN	sp|Q58DN4|PPME1_BOVIN	6	6	6	>sp|Q58DN4|PPME1_BOVIN Protein phosphatase methylesterase 1 OS=Bos taurus OX=9913 GN=PPME1 PE=2 SV=3	1	6	6	6	2	2	3	3	3	2	3	3	4	4	1	0	4	4	4	4	2	2	3	3	3	2	3	3	4	4	1	0	4	4	4	4	2	2	3	3	3	2	3	3
sp|Q58DQ3|RL6_BOVIN	sp|Q58DQ3|RL6_BOVIN	5	5	5	>sp|Q58DQ3|RL6_BOVIN 60S ribosomal protein L6 OS=Bos taurus OX=9913 GN=RPL6 PE=2 SV=3	1	5	5	5	3	3	5	4	5	4	5	4	3	5	1	3	5	4	4	4	3	3	5	4	5	4	5	4	3	5	1	3	5	4	4	4	3	3	5	4	5	4	5	4
sp|Q58DR8|SUCA_BOVIN	sp|Q58DR8|SUCA_BOVIN	12	12	12	>sp|Q58DR8|SUCA_BOVIN Succinate--CoA ligase [ADP/GDP-forming] subunit alpha, mitochondrial OS=Bos taurus OX=9913 GN=SUCLG1 PE=2 SV=3	1	12	12	12	11	11	11	11	10	10	10	11	11	10	9	8	10	9	10	9	11	11	11	11	10	10	10	11	11	10	9	8	10	9	10	9	11	11	11	11	10	10	10	11
sp|Q58DS9|RAB5C_BOVIN	sp|Q58DS9|RAB5C_BOVIN	6	4	4	>sp|Q58DS9|RAB5C_BOVIN Ras-related protein Rab-5C OS=Bos taurus OX=9913 GN=RAB5C PE=2 SV=1	1	6	4	4	6	6	6	6	6	6	6	6	6	6	5	5	6	6	6	6	4	4	4	4	4	4	4	4	4	4	4	4	4	4	4	4	4	4	4	4	4	4	4	4
sp|Q58DT1|RL7_BOVIN	sp|Q58DT1|RL7_BOVIN	4	4	4	>sp|Q58DT1|RL7_BOVIN 60S ribosomal protein L7 OS=Bos taurus OX=9913 GN=RPL7 PE=2 SV=1	1	4	4	4	3	3	3	3	3	3	4	3	3	3	2	2	3	3	3	3	3	3	3	3	3	3	4	3	3	3	2	2	3	3	3	3	3	3	3	3	3	3	4	3
sp|Q58DW0|RL4_BOVIN	sp|Q58DW0|RL4_BOVIN	6	6	6	>sp|Q58DW0|RL4_BOVIN 60S ribosomal protein L4 OS=Bos taurus OX=9913 GN=RPL4 PE=2 SV=3	1	6	6	6	6	6	5	6	6	6	6	6	6	5	2	2	6	5	6	6	6	6	5	6	6	6	6	6	6	5	2	2	6	5	6	6	6	6	5	6	6	6	6	6
sp|Q58DW5|RL5_BOVIN	sp|Q58DW5|RL5_BOVIN	4	4	4	>sp|Q58DW5|RL5_BOVIN 60S ribosomal protein L5 OS=Bos taurus OX=9913 GN=RPL5 PE=2 SV=3	1	4	4	4	3	3	4	4	3	4	3	3	4	4	2	1	4	3	4	4	3	3	4	4	3	4	3	3	4	4	2	1	4	3	4	4	3	3	4	4	3	4	3	3
sp|Q59A32|PUR2_BOVIN	sp|Q59A32|PUR2_BOVIN	4	4	4	>sp|Q59A32|PUR2_BOVIN Trifunctional purine biosynthetic protein adenosine-3 OS=Bos taurus OX=9913 GN=GART PE=2 SV=1	1	4	4	4	2	3	2	1	0	2	1	1	2	2	1	1	1	2	2	4	2	3	2	1	0	2	1	1	2	2	1	1	1	2	2	4	2	3	2	1	0	2	1	1
sp|Q59HJ6|LONM_BOVIN	sp|Q59HJ6|LONM_BOVIN	8	8	8	>sp|Q59HJ6|LONM_BOVIN Lon protease homolog, mitochondrial OS=Bos taurus OX=9913 GN=LONP1 PE=1 SV=1	1	8	8	8	6	8	6	6	8	8	8	6	8	7	2	3	6	3	8	7	6	8	6	6	8	8	8	6	8	7	2	3	6	3	8	7	6	8	6	6	8	8	8	6
sp|Q5BIN5|PIN1_BOVIN	sp|Q5BIN5|PIN1_BOVIN	7	7	7	>sp|Q5BIN5|PIN1_BOVIN Peptidyl-prolyl cis-trans isomerase NIMA-interacting 1 OS=Bos taurus OX=9913 GN=PIN1 PE=2 SV=1	1	7	7	7	5	5	6	7	6	7	6	6	7	6	2	2	6	5	5	5	5	5	6	7	6	7	6	6	7	6	2	2	6	5	5	5	5	5	6	7	6	7	6	6
sp|Q5E946|PARK7_BOVIN	sp|Q5E946|PARK7_BOVIN	20	20	20	>sp|Q5E946|PARK7_BOVIN Parkinson disease protein 7 homolog OS=Bos taurus OX=9913 GN=PARK7 PE=2 SV=1	1	20	20	20	18	18	19	19	19	20	19	18	19	20	17	14	19	19	19	20	18	18	19	19	19	20	19	18	19	20	17	14	19	19	19	20	18	18	19	19	19	20	19	18
sp|Q5E947|PRDX1_BOVIN	sp|Q5E947|PRDX1_BOVIN	17	17	14	>sp|Q5E947|PRDX1_BOVIN Peroxiredoxin-1 OS=Bos taurus OX=9913 GN=PRDX1 PE=2 SV=1	1	17	17	14	14	15	15	15	15	15	16	15	16	16	9	9	15	14	15	15	14	15	15	15	15	15	16	15	16	16	9	9	15	14	15	15	12	13	13	13	13	13	14	13
sp|Q5E948|OCAD1_BOVIN	sp|Q5E948|OCAD1_BOVIN	7	7	7	>sp|Q5E948|OCAD1_BOVIN OCIA domain-containing protein 1 OS=Bos taurus OX=9913 GN=Ociad1 PE=2 SV=1	1	7	7	7	6	6	6	7	5	5	5	5	5	5	0	0	5	5	4	5	6	6	6	7	5	5	5	5	5	5	0	0	5	5	4	5	6	6	6	7	5	5	5	5
sp|Q5E951|TBCB_BOVIN	sp|Q5E951|TBCB_BOVIN	4	4	4	>sp|Q5E951|TBCB_BOVIN Tubulin-folding cofactor B OS=Bos taurus OX=9913 GN=TBCB PE=2 SV=1	1	4	4	4	3	3	4	3	1	2	3	2	3	2	2	2	4	4	1	3	3	3	4	3	1	2	3	2	3	2	2	2	4	4	1	3	3	3	4	3	1	2	3	2
sp|Q5E954|DNJA1_BOVIN	sp|Q5E954|DNJA1_BOVIN	12	12	12	>sp|Q5E954|DNJA1_BOVIN DnaJ homolog subfamily A member 1 OS=Bos taurus OX=9913 GN=DNAJA1 PE=2 SV=2	1	12	12	12	10	8	11	10	10	12	7	8	9	9	5	5	9	10	8	8	10	8	11	10	10	12	7	8	9	9	5	5	9	10	8	8	10	8	11	10	10	12	7	8
sp|Q5E956|TPIS_BOVIN	sp|Q5E956|TPIS_BOVIN	28	28	28	>sp|Q5E956|TPIS_BOVIN Triosephosphate isomerase OS=Bos taurus OX=9913 GN=TPI1 PE=2 SV=3	1	28	28	28	28	27	24	24	26	25	25	27	27	28	25	22	27	26	25	25	28	27	24	24	26	25	25	27	27	28	25	22	27	26	25	25	28	27	24	24	26	25	25	27
sp|Q5E958|RS8_BOVIN	sp|Q5E958|RS8_BOVIN	4	4	4	>sp|Q5E958|RS8_BOVIN 40S ribosomal protein S8 OS=Bos taurus OX=9913 GN=RPS8 PE=2 SV=3	1	4	4	4	4	3	3	2	2	2	2	2	1	3	2	2	3	2	3	3	4	3	3	2	2	2	2	2	1	3	2	2	3	2	3	3	4	3	3	2	2	2	2	2
sp|Q5E959|STRAP_BOVIN	sp|Q5E959|STRAP_BOVIN	4	4	4	>sp|Q5E959|STRAP_BOVIN Serine-threonine kinase receptor-associated protein OS=Bos taurus OX=9913 GN=STRAP PE=2 SV=1	1	4	4	4	3	3	4	4	4	4	4	4	4	4	0	0	4	4	3	4	3	3	4	4	4	4	4	4	4	4	0	0	4	4	3	4	3	3	4	4	4	4	4	4
sp|Q5E963|ARP5L_BOVIN	sp|Q5E963|ARP5L_BOVIN	6	6	6	>sp|Q5E963|ARP5L_BOVIN Actin-related protein 2/3 complex subunit 5-like protein OS=Bos taurus OX=9913 GN=ARPC5L PE=2 SV=1	1	6	6	6	3	3	5	5	3	6	5	4	4	5	1	2	2	2	4	4	3	3	5	5	3	6	5	4	4	5	1	2	2	2	4	4	3	3	5	5	3	6	5	4
sp|Q5E964|PSD13_BOVIN	sp|Q5E964|PSD13_BOVIN	6	6	6	>sp|Q5E964|PSD13_BOVIN 26S proteasome non-ATPase regulatory subunit 13 OS=Bos taurus OX=9913 GN=PSMD13 PE=2 SV=1	1	6	6	6	4	6	5	5	6	5	5	5	5	6	3	2	4	4	4	5	4	6	5	5	6	5	5	5	5	6	3	2	4	4	4	5	4	6	5	5	6	5	5	5
sp|Q5E984|TCTP_BOVIN	sp|Q5E984|TCTP_BOVIN	6	6	6	>sp|Q5E984|TCTP_BOVIN Translationally-controlled tumor protein OS=Bos taurus OX=9913 GN=TPT1 PE=2 SV=1	1	6	6	6	5	4	4	6	5	5	5	4	4	4	5	5	5	4	6	5	5	4	4	6	5	5	5	4	4	4	5	5	5	4	6	5	5	4	4	6	5	5	5	4
sp|Q5E988|RS5_BOVIN	sp|Q5E988|RS5_BOVIN	4	4	4	>sp|Q5E988|RS5_BOVIN 40S ribosomal protein S5 OS=Bos taurus OX=9913 GN=RPS5 PE=2 SV=3	1	4	4	4	4	4	4	4	4	4	4	4	4	4	2	3	4	4	4	4	4	4	4	4	4	4	4	4	4	4	2	3	4	4	4	4	4	4	4	4	4	4	4	4
sp|Q5E997|CAZA2_BOVIN	sp|Q5E997|CAZA2_BOVIN	7	7	6	>sp|Q5E997|CAZA2_BOVIN F-actin-capping protein subunit alpha-2 OS=Bos taurus OX=9913 GN=CAPZA2 PE=1 SV=3	1	7	7	6	7	6	7	7	7	7	7	6	6	6	5	6	7	6	5	5	7	6	7	7	7	7	7	6	6	6	5	6	7	6	5	5	6	5	6	6	6	6	6	5
sp|Q5E9A3|PCBP1_BOVIN;sp|Q0VCU0|PCBP4_BOVIN	sp|Q5E9A3|PCBP1_BOVIN	13;1	13;1	13;1	>sp|Q5E9A3|PCBP1_BOVIN Poly(rC)-binding protein 1 OS=Bos taurus OX=9913 GN=PCBP1 PE=2 SV=1	2	13	13	13	11	11	9	11	11	12	12	12	13	13	7	3	11	12	10	11	11	11	9	11	11	12	12	12	13	13	7	3	11	12	10	11	11	11	9	11	11	12	12	12
sp|Q5E9B1|LDHB_BOVIN	sp|Q5E9B1|LDHB_BOVIN	28	28	24	>sp|Q5E9B1|LDHB_BOVIN L-lactate dehydrogenase B chain OS=Bos taurus OX=9913 GN=LDHB PE=2 SV=4	1	28	28	24	27	27	25	24	25	25	27	28	27	27	22	22	25	27	27	23	27	27	25	24	25	25	27	28	27	27	22	22	25	27	27	23	23	23	21	20	21	21	23	24
sp|Q5E9D3|MIC19_BOVIN	sp|Q5E9D3|MIC19_BOVIN	12	12	12	>sp|Q5E9D3|MIC19_BOVIN MICOS complex subunit MIC19 OS=Bos taurus OX=9913 GN=CHCHD3 PE=2 SV=1	1	12	12	12	10	12	9	10	10	11	12	11	9	10	8	6	10	9	10	11	10	12	9	10	10	11	12	11	9	10	8	6	10	9	10	11	10	12	9	10	10	11	12	11
sp|Q5E9D5|DEST_BOVIN	sp|Q5E9D5|DEST_BOVIN	14	12	12	>sp|Q5E9D5|DEST_BOVIN Destrin OS=Bos taurus OX=9913 GN=DSTN PE=2 SV=3	1	14	12	12	12	12	13	12	11	10	11	10	12	12	11	11	12	12	13	13	10	11	11	10	10	9	10	9	11	11	10	10	11	11	12	12	10	11	11	10	10	9	10	9
sp|Q5E9E6|RL10A_BOVIN	sp|Q5E9E6|RL10A_BOVIN	4	4	4	>sp|Q5E9E6|RL10A_BOVIN 60S ribosomal protein L10a OS=Bos taurus OX=9913 GN=RPL10A PE=2 SV=3	1	4	4	4	3	3	4	3	4	4	4	4	4	4	3	3	4	3	3	3	3	3	4	3	4	4	4	4	4	4	3	3	4	3	3	3	3	3	4	3	4	4	4	4
sp|Q5E9F5|TAGL2_BOVIN	sp|Q5E9F5|TAGL2_BOVIN	9	8	8	>sp|Q5E9F5|TAGL2_BOVIN Transgelin-2 OS=Bos taurus OX=9913 GN=TAGLN2 PE=2 SV=3	1	9	8	8	5	6	6	7	8	8	7	7	7	8	7	7	7	8	8	7	4	5	5	6	7	7	6	6	6	7	6	6	6	7	7	6	4	5	5	6	7	7	6	6
sp|Q5E9F7|COF1_BOVIN	sp|Q5E9F7|COF1_BOVIN	22	22	19	>sp|Q5E9F7|COF1_BOVIN Cofilin-1 OS=Bos taurus OX=9913 GN=CFL1 PE=2 SV=3	1	22	22	19	20	18	20	21	19	18	19	18	21	19	14	13	18	18	17	16	20	18	20	21	19	18	19	18	21	19	14	13	18	18	17	16	17	16	17	18	17	16	17	16
sp|Q5E9F8|H33_BOVIN;sp|A5PK61|H3C_BOVIN	sp|Q5E9F8|H33_BOVIN;sp|A5PK61|H3C_BOVIN	7;6	7;6	2;2	>sp|Q5E9F8|H33_BOVIN Histone H3.3 OS=Bos taurus OX=9913 GN=H3-3A PE=1 SV=3;>sp|A5PK61|H3C_BOVIN Histone H3.3C OS=Bos taurus OX=9913 GN=H3-5 PE=2 SV=1	2	7	7	2	7	6	5	5	6	5	7	7	7	6	7	6	5	7	7	7	7	6	5	5	6	5	7	7	7	6	7	6	5	7	7	7	2	2	1	1	1	1	2	2
sp|Q5E9F9|PRS7_BOVIN	sp|Q5E9F9|PRS7_BOVIN	4	4	4	>sp|Q5E9F9|PRS7_BOVIN 26S proteasome regulatory subunit 7 OS=Bos taurus OX=9913 GN=PSMC2 PE=2 SV=3	1	4	4	4	2	1	1	2	1	1	1	1	1	1	2	2	1	3	3	3	2	1	1	2	1	1	1	1	1	1	2	2	1	3	3	3	2	1	1	2	1	1	1	1
sp|Q5E9I6|ARF3_BOVIN;sp|P84080|ARF1_BOVIN;sp|P84081|ARF2_BOVIN	sp|Q5E9I6|ARF3_BOVIN;sp|P84080|ARF1_BOVIN;sp|P84081|ARF2_BOVIN	16;15;8	16;15;8	12;11;4	>sp|Q5E9I6|ARF3_BOVIN ADP-ribosylation factor 3 OS=Bos taurus OX=9913 GN=ARF3 PE=2 SV=3;>sp|P84080|ARF1_BOVIN ADP-ribosylation factor 1 OS=Bos taurus OX=9913 GN=ARF1 PE=1 SV=2;>sp|P84081|ARF2_BOVIN ADP-ribosylation factor 2 OS=Bos taurus OX=9913 GN=ARF2 PE	3	16	16	12	14	13	13	12	11	13	14	13	15	14	6	7	12	14	15	14	14	13	13	12	11	13	14	13	15	14	6	7	12	14	15	14	10	10	9	9	8	9	10	9
sp|Q5E9M8|SFXN1_BOVIN	sp|Q5E9M8|SFXN1_BOVIN	14	14	12	>sp|Q5E9M8|SFXN1_BOVIN Sideroflexin-1 OS=Bos taurus OX=9913 GN=SFXN1 PE=2 SV=3	1	14	14	12	13	13	11	13	14	14	13	12	13	13	9	10	12	13	12	12	13	13	11	13	14	14	13	12	13	13	9	10	12	13	12	12	12	12	9	11	12	12	11	10
sp|Q5E9Q7|2ABB_BOVIN	sp|Q5E9Q7|2ABB_BOVIN	4	4	4	>sp|Q5E9Q7|2ABB_BOVIN Serine/threonine-protein phosphatase 2A 55 kDa regulatory subunit B beta isoform OS=Bos taurus OX=9913 GN=PPP2R2B PE=2 SV=1	1	4	4	4	3	2	4	4	3	4	3	3	4	3	1	1	4	3	2	3	3	2	4	4	3	4	3	3	4	3	1	1	4	3	2	3	3	2	4	4	3	4	3	3
sp|Q5E9R3|EHD1_BOVIN	sp|Q5E9R3|EHD1_BOVIN	8	8	8	>sp|Q5E9R3|EHD1_BOVIN EH domain-containing protein 1 OS=Bos taurus OX=9913 GN=EHD1 PE=1 SV=1	1	8	8	8	8	8	5	5	4	7	8	5	8	8	4	2	8	6	7	6	8	8	5	5	4	7	8	5	8	8	4	2	8	6	7	6	8	8	5	5	4	7	8	5
sp|Q5E9T6|LGI1_BOVIN	sp|Q5E9T6|LGI1_BOVIN	7	7	7	>sp|Q5E9T6|LGI1_BOVIN Leucine-rich glioma-inactivated protein 1 OS=Bos taurus OX=9913 GN=LGI1 PE=2 SV=1	1	7	7	7	6	7	7	7	7	7	7	7	6	7	0	0	7	7	6	5	6	7	7	7	7	7	7	7	6	7	0	0	7	7	6	5	6	7	7	7	7	7	7	7
sp|Q5EA61|KCRB_BOVIN;sp|Q9XSC6|KCRM_BOVIN	sp|Q5EA61|KCRB_BOVIN	36;1	36;1	36;1	>sp|Q5EA61|KCRB_BOVIN Creatine kinase B-type OS=Bos taurus OX=9913 GN=CKB PE=1 SV=1	2	36	36	36	35	35	35	35	35	35	35	35	36	36	30	29	35	35	36	35	35	35	35	35	35	35	35	35	36	36	30	29	35	35	36	35	35	35	35	35	35	35	35	35
sp|Q5EA88|GPDA_BOVIN	sp|Q5EA88|GPDA_BOVIN	11	11	11	>sp|Q5EA88|GPDA_BOVIN Glycerol-3-phosphate dehydrogenase [NAD(+)], cytoplasmic OS=Bos taurus OX=9913 GN=GPD1 PE=2 SV=3	1	11	11	11	11	8	11	11	10	9	4	5	8	8	3	3	4	3	3	3	11	8	11	11	10	9	4	5	8	8	3	3	4	3	3	3	11	8	11	11	10	9	4	5
sp|Q5EAC6|CDC37_BOVIN;REV__sp|Q4GZT3|PKD2_BOVIN	sp|Q5EAC6|CDC37_BOVIN	12;1	12;1	12;1	>sp|Q5EAC6|CDC37_BOVIN Hsp90 co-chaperone Cdc37 OS=Bos taurus OX=9913 GN=CDC37 PE=2 SV=1	2	12	12	12	11	11	11	12	11	11	11	11	11	12	6	6	11	11	10	9	11	11	11	12	11	11	11	11	11	12	6	6	11	11	10	9	11	11	11	12	11	11	11	11
sp|Q5EAD0|BAIP2_BOVIN	sp|Q5EAD0|BAIP2_BOVIN	17	17	17	>sp|Q5EAD0|BAIP2_BOVIN Brain-specific angiogenesis inhibitor 1-associated protein 2 OS=Bos taurus OX=9913 GN=BAIAP2 PE=2 SV=1	1	17	17	17	17	14	11	11	14	15	14	15	14	12	1	2	13	15	12	11	17	14	11	11	14	15	14	15	14	12	1	2	13	15	12	11	17	14	11	11	14	15	14	15
sp|Q5EAD2|SERA_BOVIN	sp|Q5EAD2|SERA_BOVIN	17	17	17	>sp|Q5EAD2|SERA_BOVIN D-3-phosphoglycerate dehydrogenase OS=Bos taurus OX=9913 GN=PHGDH PE=2 SV=3	1	17	17	17	16	14	15	15	15	14	17	14	16	16	11	11	16	17	16	15	16	14	15	15	15	14	17	14	16	16	11	11	16	17	16	15	16	14	15	15	15	14	17	14
sp|Q5EAD4|ACDSB_BOVIN	sp|Q5EAD4|ACDSB_BOVIN	7	7	7	>sp|Q5EAD4|ACDSB_BOVIN Short/branched chain specific acyl-CoA dehydrogenase, mitochondrial OS=Bos taurus OX=9913 GN=ACADSB PE=2 SV=1	1	7	7	7	5	5	4	3	4	5	5	5	6	6	4	4	5	7	7	7	5	5	4	3	4	5	5	5	6	6	4	4	5	7	7	7	5	5	4	3	4	5	5	5
sp|Q5EAD6|RL15_BOVIN	sp|Q5EAD6|RL15_BOVIN	4	4	4	>sp|Q5EAD6|RL15_BOVIN 60S ribosomal protein L15 OS=Bos taurus OX=9913 GN=RPL15 PE=2 SV=3	1	4	4	4	4	4	3	4	4	4	4	4	4	3	2	3	4	4	3	3	4	4	3	4	4	4	4	4	4	3	2	3	4	4	3	3	4	4	3	4	4	4	4	4
sp|Q5KR47|TPM3_BOVIN	sp|Q5KR47|TPM3_BOVIN	28	14	14	>sp|Q5KR47|TPM3_BOVIN Tropomyosin alpha-3 chain OS=Bos taurus OX=9913 GN=TPM3 PE=2 SV=1	1	28	14	14	25	24	19	22	21	22	26	22	24	24	22	21	24	24	24	26	12	11	10	12	12	12	12	10	11	12	8	9	12	10	11	13	12	11	10	12	12	12	12	10
sp|Q5KR49|TPM1_BOVIN	sp|Q5KR49|TPM1_BOVIN	31	16	13	>sp|Q5KR49|TPM1_BOVIN Tropomyosin alpha-1 chain OS=Bos taurus OX=9913 GN=TPM1 PE=2 SV=1	1	31	16	13	27	27	19	22	18	18	29	28	27	26	28	27	27	28	28	29	12	12	10	12	9	10	14	15	14	12	13	14	13	14	14	15	10	10	9	10	7	8	11	12
sp|Q6B855|TKT_BOVIN	sp|Q6B855|TKT_BOVIN	27	27	27	>sp|Q6B855|TKT_BOVIN Transketolase OS=Bos taurus OX=9913 GN=TKT PE=2 SV=1	1	27	27	27	24	24	27	26	23	25	24	23	24	24	19	20	23	24	26	23	24	24	27	26	23	25	24	23	24	24	19	20	23	24	26	23	24	24	27	26	23	25	24	23
sp|Q6B856|TBB2B_BOVIN	sp|Q6B856|TBB2B_BOVIN	43	43	11	>sp|Q6B856|TBB2B_BOVIN Tubulin beta-2B chain OS=Bos taurus OX=9913 GN=TUBB2B PE=1 SV=2	1	43	43	11	36	39	38	37	40	40	35	39	42	41	34	34	38	38	40	39	36	39	38	37	40	40	35	39	42	41	34	34	38	38	40	39	7	10	9	9	10	11	9	9
sp|Q6EWQ7|IF5A1_BOVIN	sp|Q6EWQ7|IF5A1_BOVIN	6	6	6	>sp|Q6EWQ7|IF5A1_BOVIN Eukaryotic translation initiation factor 5A-1 OS=Bos taurus OX=9913 GN=EIF5A PE=2 SV=3	1	6	6	6	6	5	6	5	5	5	6	6	5	5	3	4	5	5	5	5	6	5	6	5	5	5	6	6	5	5	3	4	5	5	5	5	6	5	6	5	5	5	6	6
sp|Q6Q137|SEPT7_BOVIN	sp|Q6Q137|SEPT7_BOVIN	34	34	34	>sp|Q6Q137|SEPT7_BOVIN Septin-7 OS=Bos taurus OX=9913 GN=SEPTIN7 PE=2 SV=2	1	34	34	34	30	29	31	32	33	32	31	30	32	33	26	24	31	32	29	31	30	29	31	32	33	32	31	30	32	33	26	24	31	32	29	31	30	29	31	32	33	32	31	30
sp|Q6QRN6|NNRE_BOVIN	sp|Q6QRN6|NNRE_BOVIN	5	5	5	>sp|Q6QRN6|NNRE_BOVIN NAD(P)H-hydrate epimerase OS=Bos taurus OX=9913 GN=NAXE PE=2 SV=1	1	5	5	5	4	4	4	4	4	5	5	5	5	5	3	2	5	5	5	5	4	4	4	4	4	5	5	5	5	5	3	2	5	5	5	5	4	4	4	4	4	5	5	5
sp|Q71SP7|FAS_BOVIN	sp|Q71SP7|FAS_BOVIN	28	28	28	>sp|Q71SP7|FAS_BOVIN Fatty acid synthase OS=Bos taurus OX=9913 GN=FASN PE=1 SV=1	1	28	28	28	19	21	24	23	27	21	22	22	24	25	10	6	24	20	19	22	19	21	24	23	27	21	22	22	24	25	10	6	24	20	19	22	19	21	24	23	27	21	22	22
sp|Q76I81|RS12_BOVIN	sp|Q76I81|RS12_BOVIN	4	4	4	>sp|Q76I81|RS12_BOVIN 40S ribosomal protein S12 OS=Bos taurus OX=9913 GN=RPS12 PE=2 SV=1	1	4	4	4	1	2	3	4	4	3	3	3	3	4	0	0	3	2	3	3	1	2	3	4	4	3	3	3	3	4	0	0	3	2	3	3	1	2	3	4	4	3	3	3
sp|Q76LV1|HS90B_BOVIN	sp|Q76LV1|HS90B_BOVIN	43	24	22	>sp|Q76LV1|HS90B_BOVIN Heat shock protein HSP 90-beta OS=Bos taurus OX=9913 GN=HSP90AB1 PE=2 SV=3	1	43	24	22	38	37	40	40	41	39	41	40	39	40	30	25	39	42	38	40	22	20	21	22	22	20	23	21	21	22	16	12	21	23	19	21	20	18	19	20	20	18	21	19
sp|Q76LV2|HS90A_BOVIN	sp|Q76LV2|HS90A_BOVIN	62	62	43	>sp|Q76LV2|HS90A_BOVIN Heat shock protein HSP 90-alpha OS=Bos taurus OX=9913 GN=HSP90AA1 PE=1 SV=3	1	62	62	43	56	57	59	60	59	60	58	59	59	60	44	43	60	58	58	58	56	57	59	60	59	60	58	59	59	60	44	43	60	58	58	58	40	40	40	42	40	41	40	40
sp|Q7SIH1|A2MG_BOVIN;CON__ENSEMBL:ENSBTAP00000024146	sp|Q7SIH1|A2MG_BOVIN;CON__ENSEMBL:ENSBTAP00000024146	62;60	62;60	62;60	>sp|Q7SIH1|A2MG_BOVIN Alpha-2-macroglobulin OS=Bos taurus OX=9913 GN=A2M PE=1 SV=2;>ENSEMBL:ENSBTAP00000024146 (Bos taurus) similar to alpha-2-macroglobulin isoform 1	2	62	62	62	46	49	21	20	23	20	32	34	44	48	60	58	47	50	53	56	46	49	21	20	23	20	32	34	44	48	60	58	47	50	53	56	46	49	21	20	23	20	32	34
sp|Q865S1|AP3D1_BOVIN	sp|Q865S1|AP3D1_BOVIN	6	6	6	>sp|Q865S1|AP3D1_BOVIN AP-3 complex subunit delta-1 OS=Bos taurus OX=9913 GN=AP3D1 PE=1 SV=2	1	6	6	6	4	5	2	3	5	5	4	3	4	5	1	2	4	3	6	4	4	5	2	3	5	5	4	3	4	5	1	2	4	3	6	4	4	5	2	3	5	5	4	3
sp|Q8HXG5|NDUBB_BOVIN	sp|Q8HXG5|NDUBB_BOVIN	4	4	4	>sp|Q8HXG5|NDUBB_BOVIN NADH dehydrogenase [ubiquinone] 1 beta subcomplex subunit 11, mitochondrial OS=Bos taurus OX=9913 GN=NDUFB11 PE=1 SV=2	1	4	4	4	2	3	2	4	4	4	3	3	3	3	1	1	2	3	2	3	2	3	2	4	4	4	3	3	3	3	1	1	2	3	2	3	2	3	2	4	4	4	3	3
sp|Q8HXG6|NDUAB_BOVIN	sp|Q8HXG6|NDUAB_BOVIN	5	5	5	>sp|Q8HXG6|NDUAB_BOVIN NADH dehydrogenase [ubiquinone] 1 alpha subcomplex subunit 11 OS=Bos taurus OX=9913 GN=NDUFA11 PE=1 SV=3	1	5	5	5	5	5	5	5	5	4	4	5	5	4	3	1	3	4	4	3	5	5	5	5	5	4	4	5	5	4	3	1	3	4	4	3	5	5	5	5	5	4	4	5
sp|Q8SQH5|ADT2_BOVIN	sp|Q8SQH5|ADT2_BOVIN	21	5	5	>sp|Q8SQH5|ADT2_BOVIN ADP/ATP translocase 2 OS=Bos taurus OX=9913 GN=SLC25A5 PE=2 SV=3	1	21	5	5	17	18	20	18	20	19	19	19	20	20	9	7	18	17	19	19	2	3	4	4	5	4	3	3	4	4	2	1	3	3	3	3	2	3	4	4	5	4	3	3
sp|Q8WMY2|FPPS_BOVIN	sp|Q8WMY2|FPPS_BOVIN	4	4	4	>sp|Q8WMY2|FPPS_BOVIN Farnesyl pyrophosphate synthase OS=Bos taurus OX=9913 GN=FDPS PE=1 SV=1	1	4	4	4	4	4	4	4	4	4	4	3	4	4	2	2	4	4	4	4	4	4	4	4	4	4	4	3	4	4	2	2	4	4	4	4	4	4	4	4	4	4	4	3
sp|Q92176|COR1A_BOVIN	sp|Q92176|COR1A_BOVIN	16	16	16	>sp|Q92176|COR1A_BOVIN Coronin-1A OS=Bos taurus OX=9913 GN=CORO1A PE=1 SV=3	1	16	16	16	13	13	15	13	15	13	14	12	16	16	7	6	14	12	12	11	13	13	15	13	15	13	14	12	16	16	7	6	14	12	12	11	13	13	15	13	15	13	14	12
sp|Q95140|RLA0_BOVIN	sp|Q95140|RLA0_BOVIN	7	7	7	>sp|Q95140|RLA0_BOVIN 60S acidic ribosomal protein P0 OS=Bos taurus OX=9913 GN=RPLP0 PE=2 SV=3	1	7	7	7	5	7	6	6	7	7	7	6	7	7	3	4	6	7	6	7	5	7	6	6	7	7	7	6	7	7	3	4	6	7	6	7	5	7	6	6	7	7	7	6
sp|Q95KV7|NDUAD_BOVIN	sp|Q95KV7|NDUAD_BOVIN	5	5	5	>sp|Q95KV7|NDUAD_BOVIN NADH dehydrogenase [ubiquinone] 1 alpha subcomplex subunit 13 OS=Bos taurus OX=9913 GN=NDUFA13 PE=1 SV=3	1	5	5	5	5	4	4	3	5	4	5	5	4	4	3	4	4	3	3	3	5	4	4	3	5	4	5	5	4	4	3	4	4	3	3	3	5	4	4	3	5	4	5	5
sp|Q95M18|ENPL_BOVIN	sp|Q95M18|ENPL_BOVIN	27	25	25	>sp|Q95M18|ENPL_BOVIN Endoplasmin OS=Bos taurus OX=9913 GN=HSP90B1 PE=2 SV=1	1	27	25	25	24	23	22	23	23	23	24	26	25	24	21	21	24	25	25	24	22	21	20	21	21	21	22	24	23	22	19	19	22	23	23	22	22	21	20	21	21	21	22	24
sp|Q9BE40|MYH1_BOVIN	sp|Q9BE40|MYH1_BOVIN	5	4	2	>sp|Q9BE40|MYH1_BOVIN Myosin-1 OS=Bos taurus OX=9913 GN=MYH1 PE=2 SV=2	1	5	4	2	4	2	3	3	3	1	2	3	2	1	2	1	3	4	3	3	3	1	2	2	2	0	1	2	1	0	1	0	2	3	2	2	2	0	1	1	2	0	0	1
sp|Q9BGI0|GABT_BOVIN	sp|Q9BGI0|GABT_BOVIN	13	13	13	>sp|Q9BGI0|GABT_BOVIN 4-aminobutyrate aminotransferase, mitochondrial OS=Bos taurus OX=9913 GN=ABAT PE=2 SV=1	1	13	13	13	10	11	9	9	12	11	11	11	12	11	9	9	10	11	10	8	10	11	9	9	12	11	11	11	12	11	9	9	10	11	10	8	10	11	9	9	12	11	11	11
sp|Q9BGI1|PRDX5_BOVIN	sp|Q9BGI1|PRDX5_BOVIN	9	9	9	>sp|Q9BGI1|PRDX5_BOVIN Peroxiredoxin-5, mitochondrial OS=Bos taurus OX=9913 GN=PRDX5 PE=2 SV=2	1	9	9	9	5	5	5	6	7	6	7	8	6	7	7	7	6	6	6	7	5	5	5	6	7	6	7	8	6	7	7	7	6	6	6	7	5	5	5	6	7	6	7	8
sp|Q9BGI3|PRDX2_BOVIN	sp|Q9BGI3|PRDX2_BOVIN	17	17	17	>sp|Q9BGI3|PRDX2_BOVIN Peroxiredoxin-2 OS=Bos taurus OX=9913 GN=PRDX2 PE=2 SV=1	1	17	17	17	17	16	15	14	15	14	17	17	16	17	17	16	17	16	17	17	17	16	15	14	15	14	17	17	16	17	17	16	17	16	17	17	17	16	15	14	15	14	17	17
sp|Q9BH13|CD166_BOVIN	sp|Q9BH13|CD166_BOVIN	12	12	12	>sp|Q9BH13|CD166_BOVIN CD166 antigen OS=Bos taurus OX=9913 GN=ALCAM PE=2 SV=1	1	12	12	12	7	7	4	6	6	7	9	5	10	10	11	9	8	10	11	12	7	7	4	6	6	7	9	5	10	10	11	9	8	10	11	12	7	7	4	6	6	7	9	5
sp|Q9GKN8|PRELP_BOVIN	sp|Q9GKN8|PRELP_BOVIN	16	16	16	>sp|Q9GKN8|PRELP_BOVIN Prolargin OS=Bos taurus OX=9913 GN=PRELP PE=2 SV=1	1	16	16	16	12	12	0	0	0	0	6	9	7	9	15	14	6	6	15	16	12	12	0	0	0	0	6	9	7	9	15	14	6	6	15	16	12	12	0	0	0	0	6	9
sp|Q9GL77|S4A4_BOVIN	sp|Q9GL77|S4A4_BOVIN	9	9	9	>sp|Q9GL77|S4A4_BOVIN Electrogenic sodium bicarbonate cotransporter 1 OS=Bos taurus OX=9913 GN=SLC4A4 PE=1 SV=1	1	9	9	9	6	7	5	6	9	9	8	9	9	8	5	5	8	8	8	8	6	7	5	6	9	9	8	9	9	8	5	5	8	8	8	8	6	7	5	6	9	9	8	9
sp|Q9GMB8|SYSC_BOVIN	sp|Q9GMB8|SYSC_BOVIN	15	15	15	>sp|Q9GMB8|SYSC_BOVIN Serine--tRNA ligase, cytoplasmic OS=Bos taurus OX=9913 GN=SARS1 PE=2 SV=3	1	15	15	15	14	14	12	14	15	13	11	10	13	12	11	9	12	13	11	10	14	14	12	14	15	13	11	10	13	12	11	9	12	13	11	10	14	14	12	14	15	13	11	10
sp|Q9MZ08|BCAM_BOVIN	sp|Q9MZ08|BCAM_BOVIN	5	5	5	>sp|Q9MZ08|BCAM_BOVIN Basal cell adhesion molecule OS=Bos taurus OX=9913 GN=BCAM PE=2 SV=2	1	5	5	5	2	2	1	2	2	3	3	3	4	4	2	2	3	2	3	4	2	2	1	2	2	3	3	3	4	4	2	2	3	2	3	4	2	2	1	2	2	3	3	3
sp|Q9MZ13|VDAC3_BOVIN	sp|Q9MZ13|VDAC3_BOVIN	10	10	10	>sp|Q9MZ13|VDAC3_BOVIN Voltage-dependent anion-selective channel protein 3 OS=Bos taurus OX=9913 GN=VDAC3 PE=2 SV=1	1	10	10	10	10	9	9	9	10	10	9	9	10	10	7	8	10	10	10	10	10	9	9	9	10	10	9	9	10	10	7	8	10	10	10	10	10	9	9	9	10	10	9	9
sp|Q9N0V4|GSTM1_BOVIN	sp|Q9N0V4|GSTM1_BOVIN	17	17	17	>sp|Q9N0V4|GSTM1_BOVIN Glutathione S-transferase Mu 1 OS=Bos taurus OX=9913 GN=GSTM1 PE=1 SV=3	1	17	17	17	17	15	15	14	14	14	14	12	16	17	13	14	17	17	17	17	17	15	15	14	14	14	14	12	16	17	13	14	17	17	17	17	17	15	15	14	14	14	14	12
sp|Q9N179|EPB41_BOVIN	sp|Q9N179|EPB41_BOVIN	8	8	8	>sp|Q9N179|EPB41_BOVIN Protein 4.1 OS=Bos taurus OX=9913 GN=EPB41 PE=2 SV=1	1	8	8	8	3	3	2	3	2	3	4	3	3	3	6	7	3	5	4	4	3	3	2	3	2	3	4	3	3	3	6	7	3	5	4	4	3	3	2	3	2	3	4	3
sp|Q9N285|MTCH2_BOVIN	sp|Q9N285|MTCH2_BOVIN	9	9	9	>sp|Q9N285|MTCH2_BOVIN Mitochondrial carrier homolog 2 OS=Bos taurus OX=9913 GN=MTCH2 PE=2 SV=3	1	9	9	9	8	9	9	9	9	9	8	8	9	9	5	4	9	9	8	9	8	9	9	9	9	9	8	8	9	9	5	4	9	9	8	9	8	9	9	9	9	9	8	8
sp|Q9TRY0|FKBP4_BOVIN	sp|Q9TRY0|FKBP4_BOVIN	13	13	13	>sp|Q9TRY0|FKBP4_BOVIN Peptidyl-prolyl cis-trans isomerase FKBP4 OS=Bos taurus OX=9913 GN=FKBP4 PE=1 SV=4	1	13	13	13	9	9	11	10	12	12	11	11	9	11	6	6	8	9	8	9	9	9	11	10	12	12	11	11	9	11	6	6	8	9	8	9	9	9	11	10	12	12	11	11
sp|Q9TS87|TAGL_BOVIN	sp|Q9TS87|TAGL_BOVIN	23	23	23	>sp|Q9TS87|TAGL_BOVIN Transgelin OS=Bos taurus OX=9913 GN=TAGLN PE=1 SV=4	1	23	23	23	19	19	8	8	8	6	19	20	18	17	23	23	16	16	21	23	19	19	8	8	8	6	19	20	18	17	23	23	16	16	21	23	19	19	8	8	8	6	19	20
sp|Q9TTK8|KCRU_BOVIN;sp|Q3ZBP1|KCRS_BOVIN	sp|Q9TTK8|KCRU_BOVIN	23;2	23;2	23;2	>sp|Q9TTK8|KCRU_BOVIN Creatine kinase U-type, mitochondrial OS=Bos taurus OX=9913 GN=CKMT1 PE=2 SV=1	2	23	23	23	22	22	19	20	19	20	21	21	22	22	18	17	21	20	20	20	22	22	19	20	19	20	21	21	22	22	18	17	21	20	20	20	22	22	19	20	19	20	21	21
sp|Q9XSA7|CLIC4_BOVIN	sp|Q9XSA7|CLIC4_BOVIN	5	5	5	>sp|Q9XSA7|CLIC4_BOVIN Chloride intracellular channel protein 4 OS=Bos taurus OX=9913 GN=CLIC4 PE=2 SV=3	1	5	5	5	3	3	4	5	4	4	4	4	4	4	3	4	3	3	2	3	3	3	4	5	4	4	4	4	4	4	3	4	3	3	2	3	3	3	4	5	4	4	4	4
sp|Q9XSG3|IDHC_BOVIN	sp|Q9XSG3|IDHC_BOVIN	20	19	19	>sp|Q9XSG3|IDHC_BOVIN Isocitrate dehydrogenase [NADP] cytoplasmic OS=Bos taurus OX=9913 GN=IDH1 PE=2 SV=1	1	20	19	19	17	14	18	16	19	19	17	16	18	18	10	10	16	19	15	14	16	13	17	15	18	18	16	15	17	17	9	9	15	18	14	13	16	13	17	15	18	18	16	15
sp|Q9XSI3|RL10_BOVIN;sp|Q2TBW8|RL10L_BOVIN	sp|Q9XSI3|RL10_BOVIN;sp|Q2TBW8|RL10L_BOVIN	4;3	4;3	4;3	>sp|Q9XSI3|RL10_BOVIN 60S ribosomal protein L10 OS=Bos taurus OX=9913 GN=RPL10 PE=2 SV=4;>sp|Q2TBW8|RL10L_BOVIN 60S ribosomal protein L10-like OS=Bos taurus OX=9913 GN=RPL10L PE=2 SV=1	2	4	4	4	4	2	4	4	4	3	3	4	4	4	3	0	4	4	4	4	4	2	4	4	4	3	3	4	4	4	3	0	4	4	4	4	4	2	4	4	4	3	3	4
sp|Q9XSJ4|ENOA_BOVIN	sp|Q9XSJ4|ENOA_BOVIN	44	44	37	>sp|Q9XSJ4|ENOA_BOVIN Alpha-enolase OS=Bos taurus OX=9913 GN=ENO1 PE=1 SV=4	1	44	44	37	41	42	40	41	39	41	41	44	42	42	36	37	40	38	39	41	41	42	40	41	39	41	41	44	42	42	36	37	40	38	39	41	34	35	33	34	32	34	34	37
[truncated: 110 more columns]

## Sheet: sheet2_AG_AD Student's T-test
LFQ intensity AD3_REP1_2	LFQ intensity AD3_REP2_2	LFQ intensity AD4_REP1_2	LFQ intensity AD4_REP2_2	LFQ intensity AD5_REP1_2	LFQ intensity AD5_REP2_2	LFQ intensity AD1_REP1_2	LFQ intensity AD1_REP2_2	LFQ intensity AD2_REP1_2	LFQ intensity AD2_REP2_2	LFQ intensity AG1_REP1_6	LFQ intensity AG1_REP2_6	LFQ intensity AG3_REP1_6	LFQ intensity AG3_REP2_6	LFQ intensity AG4_REP1_6	LFQ intensity AG4_REP2_6	Student's T-test Significant AGED_ADULT	Student's T-test significant	LOG2 fold change	Fold change	Peptides	Unique peptides	Uniprot Code	Name	Gene
ADULT	ADULT	ADULT	ADULT	ADULT	ADULT	ADULT	ADULT	ADULT	ADULT	AGED	AGED	AGED	AGED	AGED	AGED
22.9659	23.1559	23.7358	23.4695	23.4485	23.4187	23.4534	23.4298	22.8787	23.1974	22.7301	22.6739	23.1968	23.2219	22.7788	22.9418	+	AGED_ADULT	-0.391461	0.762357	10	9	A2VDZ9	Vesicle-associated membrane protein-associated protein B	VAPB
23.2734	22.9467	23.7604	23.7332	23.6463	23.6147	23.2684	23.3302	23.5302	23.2466	22.5799	22.7901	23.2771	23.3292	22.813	22.8171	+	AGED_ADULT	-0.500594	0.706816	21	21	A4IF63	Tripartite motif-containing protein 2	TRIM2
22.4847	22.4361	22.5046	22.3919	22.4034	22.3431	22.3391	22.5349	22.1763	22.1591	24.0952	24.2201	22.9193	22.8224	23.1641	23.123	+	AGED_ADULT	1.01341	2.01868	8	8	A4IF97	Myosin regulatory light chain 12B	MYL12B
23.295	23.4553	23.6208	23.7075	23.8022	23.8015	23.8569	23.6978	23.4308	23.2765	22.4277	22.6568	23.3122	23.2564	23.4605	23.5197	+	AGED_ADULT	-0.488891	0.712573	8	7	A6QLP2	Adenosylhomocysteinase 3	AHCYL2
23.58	23.6069	23.5532	23.6079	23.8679	23.9839	23.5673	23.7595	23.4687	23.4722	22.3985	22.1768	23.6622	23.5619	23.3576	23.1952	+	AGED_ADULT	-0.588081	0.665227	8	8	A6QR46	Ras-related protein Rab-6B	RAB6B
24.4137	24.3295	24.2955	24.3549	24.3393	24.2757	24.4083	24.3365	24.1218	24.3346	23.257	23.1866	24.2045	24.2332	24.1584	23.9909	+	AGED_ADULT	-0.482544	0.715714	21	21	A7MB35	Pyruvate dehydrogenase E1 component subunit alpha, somatic form, mitochondrial	PDHA1
19.4498	19.6412	19.7423	19.6891	19.0425	19.4565	19.3596	19.5501	19.6884	19.4769	20.359	20.1653	19.686	19.4862	20.2048	20.232	+	AGED_ADULT	0.51258	1.4266	5	5	A7YWE4	Delta-1-pyrroline-5-carboxylate dehydrogenase, mitochondrial	ALDH4A1
24.3189	24.4656	25.2103	25.228	24.7211	24.6434	24.0772	24.0717	24.444	24.5173	22.8776	23.2213	24.2101	24.1875	24.0276	23.9321	+	AGED_ADULT	-0.827036	0.563686	20	20	F1MVX2	Glutathione S-transferase LANCL1	LANCL1
21.0105	21.1974	21.9694	22.1098	22.0956	21.9183	20.7445	20.3768	21.1141	20.6935	20.6375	20.0492	20.2814	21.1091	19.6585	20.2698	+	AGED_ADULT	-0.988734	0.50392	8	8	F1N5C8	Glycerophosphocholine choline phosphodiesterase ENPP6	ENPP6
23.7873	23.5678	21.0876	21.9088	22.0513	21.8667	22.1191	22.2716	22.4812	21.9349	25.9847	26.0992	22.7586	22.9025	24.0317	24.104	+	AGED_ADULT	2.00581	4.01614	8	8	O46375	Transthyretin	TTR
23.7678	23.7726	23.688	23.5275	23.9277	23.9809	23.8937	23.9991	24.1063	24.017	22.991	22.6363	23.8748	23.8971	23.4691	23.4461	+	AGED_ADULT	-0.482329	0.715821	14	14	O46563	V-type proton ATPase subunit H	ATP6V1H
20.5821	20.6674	19.1211	19.5126	19.1914	20.4285	20.4116	20.3396	20.5479	20.6852	25.5928	25.3482	20.0926	19.1213	23.9317	23.6996	+	AGED_ADULT	2.81565	7.04036	27	21	O62654	Desmin	DES
23.8824	23.8702	23.5656	23.5818	24.3795	24.1601	24.5771	24.4241	24.4078	24.4455	24.6706	24.7746	25.2164	25.2628	25.2917	25.3456	+	AGED_ADULT	0.964202	1.95098	7	7	O77750	Aquaporin-4	AQP4
28.4193	28.4089	29.7741	29.948	28.6681	28.5699	27.2583	27.215	26.7789	26.7857	26.1043	26.1331	26.1638	26.1693	25.6809	25.5829	+	AGED_ADULT	-2.21022	0.216101	88	82	O77788	Neurofilament medium polypeptide	NEFM
25.3901	25.4012	25.6293	25.3792	25.5274	25.4312	24.8475	24.9016	25.1237	25.2528	25.9187	25.8412	25.5374	25.4189	25.5488	25.6323	+	AGED_ADULT	0.361161	1.28446	17	17	O77834	Peroxiredoxin-6	PRDX6
24.1193	24.2554	24.1581	24.1418	23.8966	23.8821	24.4044	24.2832	23.8284	23.8266	23.3244	23.2871	23.9967	23.9814	23.8477	23.6957	+	AGED_ADULT	-0.39074	0.762738	13	13	P00129	Cytochrome b-c1 complex subunit 7	UQCRB
26.6882	26.7009	26.7801	26.6224	26.681	26.5747	27.067	27.2019	26.5922	26.6649	25.995	25.8826	26.3159	26.3956	26.1664	26.1478	+	AGED_ADULT	-0.606792	0.656655	31	31	P00366	Glutamate dehydrogenase 1, mitochondrial	GLUD1
25.3781	25.3139	25.1858	25.2278	25.2206	25.1664	25.5105	25.4786	24.9967	25.1023	24.383	24.2317	25.072	25.0707	25.1843	24.8357	+	AGED_ADULT	-0.461848	0.726056	11	11	P00423	Cytochrome c oxidase subunit 4 isoform 1, mitochondrial	COX4I1
23.794	23.8613	23.0755	23.3099	22.5549	22.7649	23.4624	23.4003	22.7078	22.6621	25.4738	25.465	23.8284	23.7881	23.5502	23.7011	+	AGED_ADULT	1.14179	2.20655	21	21	P00432	Catalase	CAT
23.573	23.63	24.3173	24.1909	24.0155	24.0693	23.6362	23.7625	24.0342	23.9183	23.607	23.6502	23.7811	23.6051	23.4285	23.4415	+	AGED_ADULT	-0.329146	0.796007	24	24	P00727	Cytosol aminopeptidase	LAP3
24.7589	24.8437	23.3012	23.1335	22.4841	22.7292	24.5194	24.5467	22.7688	22.7902	27.1482	26.9594	25.3428	25.351	25.4413	25.2797	+	AGED_ADULT	2.33283	5.03793	19	19	P00921	Carbonic anhydrase 2	CA2
28.4499	28.4393	29.3097	29.3512	28.3564	28.3423	27.2027	27.3182	26.8286	26.7725	26.2246	26.1816	26.3108	26.2398	25.5316	25.6481	+	AGED_ADULT	-2.01432	0.247531	57	52	P02548	Neurofilament light polypeptide	NEFL
29.5667	29.4935	31.3107	31.6062	30.4944	30.3126	29.3347	29.1853	29.2742	29.5066	28.3949	28.4283	28.529	28.6018	27.7975	27.703	+	AGED_ADULT	-1.76608	0.294007	30	30	P02687	Myelin basic protein	MBP
27.1645	27.2025	26.7071	26.7145	26.9085	26.8293	27.1666	27.0948	26.8816	26.9474	25.6807	25.7477	26.7301	26.7554	26.7642	26.5625	+	AGED_ADULT	-0.588223	0.665162	24	12	P02722	ADP/ATP translocase 1	SLC25A4
24.1282	24.2788	24.2232	24.3514	23.6792	23.8349	24.129	24.2076	23.7933	23.7233	22.6017	22.8387	23.8318	23.7901	23.9485	23.5138	+	AGED_ADULT	-0.614132	0.653323	5	5	P04038	Cytochrome c oxidase subunit 6C	COX6C
28.7778	28.6552	30.0741	30.3466	29.9096	29.8044	28.4501	28.3213	28.7895	28.8022	27.1338	27.2067	27.5376	27.7255	27.1159	26.9904	+	AGED_ADULT	-1.90808	0.266447	15	15	P04116	Myelin proteolipid protein	PLP1
23.2571	23.3596	21.2702	21.9247	21.4874	21.6277	23.1748	23.3094	22.944	23.1142	26.4766	26.3275	22.9197	23.1264	25.3291	25.4029	+	AGED_ADULT	2.38346	5.21787	23	23	P04272	Annexin A2	ANXA2
23.3972	23.5369	23.7268	23.7975	23.5093	23.5495	23.0772	22.9888	23.4769	23.506	22.061	21.94	23.2033	23.068	23.0334	22.8156	+	AGED_ADULT	-0.769736	0.586525	23	11	P04409	Protein kinase C alpha type	PRKCA
22.6145	22.7506	23.2716	23.3419	23.162	23.1744	22.8831	22.8379	22.9373	22.7685	21.7013	22.1472	22.7199	22.7875	22.6109	22.6022	+	AGED_ADULT	-0.546004	0.684915	13	12	P04896	Guanine nucleotide-binding protein G(s) subunit alpha isoforms short	GNAS
22.2213	22.546	23.3309	23.14	22.685	22.7951	22.04	21.8919	22.317	22.5305	20.9346	21.1608	21.7123	21.8297	20.8782	21.4225	+	AGED_ADULT	-1.22673	0.427286	22	11	P05126	Protein kinase C beta type	PRKCB
23.4944	23.1845	23.1191	22.9705	23.2338	23.3117	23.2085	23.495	23.277	23.239	22.189	22.2078	23.0365	23.0595	23.1893	22.913	+	AGED_ADULT	-0.487495	0.713262	16	5	P05131	cAMP-dependent protein kinase catalytic subunit beta	PRKACB
22.7852	22.8443	22.954	23.3073	22.7672	23.0343	23.0126	23.1017	22.7422	22.7306	23.9615	23.846	22.8223	22.9401	23.4773	23.4902	+	AGED_ADULT	0.494961	1.40928	13	13	P05307	Protein disulfide-isomerase	P4HB
28.7756	28.7933	30.2247	30.3457	29.6278	29.5645	28.2879	28.2928	28.5605	28.5487	27.7761	27.8114	28.0926	28.0207	27.2887	27.1871	+	AGED_ADULT	-1.40605	0.377345	56	56	P06623	2,3-cyclic-nucleotide 3-phosphodiesterase	CNP
25.4714	25.3479	26.0447	26.0515	25.4127	25.4372	25.6423	25.8475	25.5583	25.5598	26.1113	26.0093	25.9248	25.994	25.9629	25.9434	+	AGED_ADULT	0.353614	1.27776	13	13	P07107	Acyl-CoA-binding protein	DBI
23.8588	23.6068	23.5669	23.1353	23.3872	23.0369	23.5221	23.3151	23.5723	23.6497	24.0949	23.8436	24.066	24.0623	24.0486	24.0447	+	AGED_ADULT	0.561597	1.4759	13	13	P07514	NADH-cytochrome b5 reductase 3	CYB5R3
21.1793	21.1743	21.9751	21.7646	21.6449	21.5077	21.1927	21.465	21.3112	21.256	19.8366	19.8517	21.2304	21.0459	21.188	21.3205	+	AGED_ADULT	-0.701565	0.614905	5	5	P07857	Sterol carrier protein 2	SCP2
29.6391	29.5631	29.5544	29.4097	29.5557	29.476	29.4356	29.3593	29.4584	29.5172	28.9319	29.0066	29.4623	29.4781	29.2772	29.3382	+	AGED_ADULT	-0.24776	0.842203	36	34	P10096	Glyceraldehyde-3-phosphate dehydrogenase	GAPDH
23.6671	23.6635	23.8107	23.5206	23.8323	23.8594	23.8541	23.9022	23.7032	23.8126	22.499	22.1486	23.7368	23.5743	23.1465	23.0599	+	AGED_ADULT	-0.735086	0.600782	28	28	P10894	1-phosphatidylinositol 4,5-bisphosphate phosphodiesterase beta-1	PLCB1
23.9976	23.8484	23.6761	23.6292	23.7791	23.8647	24.1717	24.0309	23.7154	23.8633	23.033	23.1332	23.7218	23.7188	23.5524	23.552	+	AGED_ADULT	-0.405761	0.754838	13	13	P11179	Dihydrolipoyllysine-residue succinyltransferase component of 2-oxoglutarate dehydrogenase complex, mitochondrial	DLST
25.6222	25.6165	25.259	25.3613	25.4995	25.4244	25.5925	25.4954	25.2814	25.4019	24.5074	24.3936	24.9927	25.0695	25.0231	25.08	+	AGED_ADULT	-0.611025	0.654731	19	19	P12234	Phosphate carrier protein, mitochondrial	SLC25A3
25.9205	25.9724	21.935	21.6432	21.066	21.1741	24.0926	24.3285	24.0555	23.8993	27.4906	27.4797	25.5978	25.6022	25.7253	25.5878	+	AGED_ADULT	2.83853	7.1529	21	21	P12799	Fibrinogen gamma-B chain	FGG
21.6826	22.1098	21.9962	22.1104	21.7105	21.9753	22.1883	22.2046	21.8668	21.5118	19.534	19.6597	21.8615	21.6617	21.5664	21.054	+	AGED_ADULT	-1.0461	0.484275	7	7	P13271	Cytochrome b-c1 complex subunit 8	UQCRQ
24.943	24.9932	24.7653	24.9123	24.4481	24.6614	25.0115	24.7955	24.4855	24.5071	23.9165	24.079	24.5368	24.4304	24.7182	24.4546	+	AGED_ADULT	-0.396354	0.759776	14	14	P13619	ATP synthase F(0) complex subunit B1, mitochondrial	ATP5PB
28.3534	28.3356	28.6392	28.5412	28.4326	28.4509	28.4198	28.3844	28.1537	28.279	27.6909	27.6949	28.3396	28.3375	28.1109	28.0928	+	AGED_ADULT	-0.354549	0.782114	49	36	P19120	Heat shock cognate 71 kDa protein	HSPA8
26.8304	26.8855	26.764	26.7738	26.8917	26.8622	26.9453	27.0163	26.7567	26.8059	26.043	26.0762	26.6863	26.6546	26.6811	26.612	+	AGED_ADULT	-0.394295	0.760861	51	51	P20004	Aconitate hydratase, mitochondrial	ACO2
20.6471	20.3544	20.2358	20.6605	20.9706	21.3159	20.82	21.5489	22.0589	21.7893	21.2262	21.3875	23.2077	23.257	21.5457	22.3129	+	AGED_ADULT	1.116	2.16746	10	10	P20616	Secretogranin-2	SCG2
22.7166	23.002	22.914	22.9644	22.9512	22.9299	23.163	23.1451	23.3906	23.3721	23.2835	23.2871	23.4847	23.5455	23.4512	23.4287	+	AGED_ADULT	0.358567	1.28215	13	10	P21398	Amine oxidase [flavin-containing] A	MAOA
23.8711	23.409	19.6789	19.7612	19.1322	20.3584	21.7967	21.3598	21.5874	21.7267	27.3454	27.4549	21.5527	20.9206	25.6637	25.7338	+	AGED_ADULT	3.51036	11.3953	18	18	P21809	Biglycan	BGN
26.8187	26.913	26.8553	26.7669	26.9413	27.0529	26.7892	26.8441	26.938	26.9116	26.0801	26.1814	26.8676	26.8105	26.556	26.5466	+	AGED_ADULT	-0.376055	0.770542	36	27	P21856	Rab GDP dissociation inhibitor alpha	GDI1
24.9444	24.786	24.128	24.2022	24.4921	24.4641	24.6372	24.6248	24.6222	24.5309	23.4578	23.4191	24.2526	24.281	24.0566	23.9896	+	AGED_ADULT	-0.633737	0.644505	18	18	P22292	Mitochondrial 2-oxoglutarate/malate carrier protein	SLC25A11
26.0908	26.0847	25.9611	26.0099	26.0122	25.8752	26.2182	26.3067	25.8505	25.8539	25.305	25.4355	25.8822	25.9581	25.9322	25.8322	+	AGED_ADULT	-0.302124	0.811057	21	21	P23004	Cytochrome b-c1 complex subunit 2, mitochondrial	UQCRC2
21.4978	21.5584	20.4344	20.7377	20.2146	19.6404	20.3504	19.9731	19.216	19.5611	24.1249	24.0988	20.4735	20.4459	21.6176	21.5182	+	AGED_ADULT	1.7281	3.31291	7	7	P23805	Conglutinin	CGN1
23.3471	23.4147	23.5578	23.7656	23.4884	23.4396	23.6264	23.604	23.331	23.3083	21.962	22.3399	23.3399	23.3506	22.9976	23.2055	+	AGED_ADULT	-0.622381	0.649598	7	7	P23934	NADH dehydrogenase [ubiquinone] iron-sulfur protein 6, mitochondrial	NDUFS6
23.3761	23.1262	23.1702	22.9353	23.0329	23.0895	23.362	23.2418	23.0184	22.9812	22.1525	22.0645	22.9692	22.9651	22.9016	22.8128	+	AGED_ADULT	-0.489079	0.71248	7	7	P23935	NADH dehydrogenase [ubiquinone] 1 alpha subcomplex subunit 5	NDUFA5
21.3877	19.9046	21.431	21.3691	21.4139	21.3535	21.563	21.6877	21.1237	21.2139	21.367	18.8625	19.4669	18.8747	20.5878	19.7771	+	AGED_ADULT	-1.42214	0.373159	5	5	P26452	40S ribosomal protein SA	RPSA
22.0085	21.8038	21.6031	21.7006	21.9928	21.892	22.124	22.1799	21.9224	21.9462	21.8883	22.2213	22.5368	22.5412	22.5063	22.4098	+	AGED_ADULT	0.433276	1.3503	5	5	P27674	Solute carrier family 2, facilitated glucose transporter member 1	SLC2A1
24.3331	24.2694	25.6661	25.8683	25.1806	25.3161	24.0115	24.0634	24.3115	24.2622	23.5076	20.8841	24.3263	24.2181	23.3578	23.6749	+	AGED_ADULT	-1.40009	0.378906	6	6	P30932	CD9 antigen	CD9
24.158	24.1041	24.1546	23.9872	24.3288	24.2809	24.2864	24.1854	24.2032	24.2786	22.9323	22.9835	23.9278	24.0463	23.9542	24.0487	+	AGED_ADULT	-0.547933	0.683999	16	13	P31322	cAMP-dependent protein kinase type II-beta regulatory subunit	PRKAR2B
23.0916	22.9646	23.0135	23.0689	22.5233	22.7	23.2051	22.9967	23.038	23.0673	23.7005	23.8218	23.0927	23.0707	23.2435	23.3181	+	AGED_ADULT	0.40766	1.32653	18	12	P31976	Ezrin	EZR
25.1294	25.1656	24.6005	24.5799	24.9349	24.9866	25.1595	25.1432	25.212	25.0981	23.3872	23.9693	24.6453	24.5721	24.546	24.7786	+	AGED_ADULT	-0.684559	0.622196	23	8	P32007	ADP/ATP translocase 3	SLC25A6
26.3422	26.326	26.6744	26.7285	26.5001	26.523	26.4985	26.4925	26.422	26.2945	25.6471	25.618	26.1534	26.2229	26.0484	25.8217	+	AGED_ADULT	-0.561599	0.677551	35	35	P33097	Aspartate aminotransferase, cytoplasmic	GOT1
22.9382	22.9252	23.3162	23.3938	23.213	23.1014	22.0157	22.1767	23.2137	23.1398	25.2755	25.0144	23.5388	23.5642	23.6502	23.8772	+	AGED_ADULT	1.21002	2.3134	9	9	P35466	Protein S100-A4	S100A4
21.7435	21.132	22.7688	23.0881	21.6378	22.0016	22.8189	22.6629	22.3862	22.2286	20.6021	20.1637	21.2714	20.9478	19.9553	21.2757	+	AGED_ADULT	-1.54416	0.342895	5	5	P35722	Neurogranin	NRGN
24.9927	24.9076	25.3154	25.2482	25.0694	25.1674	25.0393	25.0873	24.9121	24.8955	25.8639	25.8972	25.2047	25.1808	25.3621	25.3116	+	AGED_ADULT	0.406552	1.32551	24	24	P38657	Protein disulfide-isomerase A3	PDIA3
25.296	25.3305	24.7783	24.7867	24.9618	25.0005	25.3146	25.2281	25.0785	25.2248	24.0501	24.1602	24.8809	25.0222	24.7249	24.8087	+	AGED_ADULT	-0.492129	0.710975	18	18	P41563	Isocitrate dehydrogenase [NAD] subunit alpha, mitochondrial	IDH3A
24.3576	24.4692	24.0942	24.0296	24.3501	24.6368	24.436	24.5644	24.2518	24.4426	23.2874	23.2138	24.2582	24.4573	23.9865	23.8521	+	AGED_ADULT	-0.520682	0.697042	10	10	P41976	Superoxide dismutase [Mn], mitochondrial	SOD2
23.6465	23.534	23.4931	23.532	23.7727	23.7405	23.5379	23.6269	23.4165	23.6091	22.5778	22.4532	23.5159	23.4987	23.4985	23.3116	+	AGED_ADULT	-0.448274	0.732919	21	21	P42659	Dipeptidyl aminopeptidase-like protein 6	DPP6
22.6984	22.6814	22.6422	22.3609	22.715	22.7327	22.8958	22.8745	22.4621	22.5791	22.8195	22.8596	22.9417	22.9636	22.9227	23.0198	+	AGED_ADULT	0.256912	1.19492	7	7	P42899	60S acidic ribosomal protein P2	RPLP2
22.1397	22.2786	22.944	22.8526	22.7006	22.6404	22.1702	22.2603	22.2808	22.4874	21.436	21.6815	22.3439	22.4552	22.1128	21.8898	+	AGED_ADULT	-0.488922	0.712558	11	11	P43033	Platelet-activating factor acetylhydrolase IB subunit beta	PAFAH1B1
21.7648	21.6934	21.1428	20.9552	21.2014	20.8023	21.9909	21.386	20.8128	20.8537	24.6321	24.5607	20.7782	21.4857	23.3243	23.3023	+	AGED_ADULT	1.75354	3.37186	11	11	P46193	Annexin A1	ANXA1
19.757	20.2008	18.8155	18.5706	19.5401	18.2047	21.1363	21.1268	20.5638	20.1667	21.4164	21.7048	20.5256	20.4449	22.5206	21.8831	+	AGED_ADULT	1.60767	3.0476	5	5	P48034	Aldehyde oxidase 1	AOX1
21.6496	21.7789	21.7698	21.9483	21.7255	21.9422	22.0125	21.9613	21.5094	21.5023	20.1155	20.5405	21.4459	21.6009	21.5461	21.7067	+	AGED_ADULT	-0.620722	0.650346	4	4	P48305	NADH dehydrogenase [ubiquinone] 1 beta subcomplex subunit 4	NDUFB4
25.7337	25.5971	25.7459	25.6947	25.6336	25.6567	25.5162	25.5379	25.4408	25.4891	24.2843	24.2681	25.2526	25.2499	25.172	25.0697	+	AGED_ADULT	-0.721803	0.606339	26	26	P48452	Serine/threonine-protein phosphatase 2B catalytic subunit alpha isoform	PPP3CA
27.2353	27.1848	25.7232	25.8171	25.3809	25.2919	27.3281	27.3063	26.8286	26.7806	30.2671	30.1823	27.2474	27.2983	29.5549	29.477	+	AGED_ADULT	2.51683	5.72324	73	60	P48616	Vimentin	VIM
21.8084	21.931	19.3928	19.6315	19.5705	19.7406	21.8679	22.1207	20.6002	20.6581	24.8778	24.8225	20.9998	20.6768	22.9255	23.1039	+	AGED_ADULT	2.16888	4.49673	16	16	P48644	Aldehyde dehydrogenase 1A1	ALDH1A1
24.9095	24.993	24.8405	24.9436	24.8519	24.7436	25.1183	25.0418	24.7072	24.7606	24.3798	24.1787	24.5466	24.4958	24.1524	24.4269	+	AGED_ADULT	-0.527606	0.693705	25	25	P49410	Elongation factor Tu, mitochondrial	TUFM
28.2791	28.3089	28.0062	27.8937	28.3799	28.3463	28.3328	28.3491	28.2649	28.2759	27.3296	27.3225	28.1831	28.1505	27.9123	27.9025	+	AGED_ADULT	-0.44361	0.735293	102	102	P49951	Clathrin heavy chain 1	CLTC
24.8298	24.9247	23.3335	23.2616	22.9709	23.0484	24.073	24.105	23.2826	23.3137	26.4278	26.3271	24.457	24.2779	24.3161	24.2926	+	AGED_ADULT	1.30209	2.46586	14	14	P52556	Flavin reductase (NADPH)	BLVRB
25.988	26.1941	27.3649	27.27	26.2447	26.3037	25.1643	25.2887	25.1978	25.1232	24.5401	24.5479	25.1008	25.0349	23.9265	23.9928	+	AGED_ADULT	-1.49011	0.355986	17	17	P55803	Myelin-oligodendrocyte glycoprotein	MOG
23.7877	23.8366	23.5334	23.5901	23.295	23.3051	23.728	23.571	23.6445	23.6684	25.6751	25.6839	23.6826	23.6342	24.7657	24.5506	+	AGED_ADULT	1.06938	2.09853	7	7	P60661	Myosin light polypeptide 6	MYL6
25.9292	26.0416	26.0374	26.2893	26.0705	26.103	26.2947	26.3374	25.7794	25.6065	25.0078	25.1798	25.6069	25.5651	25.6303	25.4872	+	AGED_ADULT	-0.636041	0.643476	23	19	P61267	Syntaxin-1B	STX1B
28.0304	28.1547	28.004	27.9687	28.1304	28.0499	28.2364	28.1015	27.9689	27.9859	26.9668	26.9816	27.7028	27.6684	27.7216	27.6672	+	AGED_ADULT	-0.611698	0.654426	62	62	P61763	Syntaxin-binding protein 1	STXBP1
27.0796	27.0761	27.3115	27.4458	27.3133	27.1945	27.2374	27.1446	27.199	27.223	26.6085	26.5819	27.1177	27.1238	27.1747	26.9523	+	AGED_ADULT	-0.295992	0.814512	28	25	P62261	14-3-3 protein epsilon	YWHAE
25.9255	25.894	26.1352	26.3533	25.9565	25.9434	25.8822	25.9499	25.5968	25.7581	24.476	24.5086	25.7888	25.8074	25.3553	25.2588	+	AGED_ADULT	-0.740339	0.598598	20	18	P62763	Visinin-like protein 1	VSNL1
20.3388	20.4492	19.1259	19.0532	20.0146	19.7747	20.5101	20.7638	20.089	19.7648	24.1381	23.4754	20.6146	20.7322	23.1364	22.8214	+	AGED_ADULT	2.49794	5.64878	9	8	P62964	Cellular retinoic acid-binding protein 1	CRABP1
24.2188	24.3824	23.7026	23.549	24.4531	24.2433	24.3207	24.4987	24.7732	24.9126	24.9511	25.0758	24.589	24.5862	25.216	24.9212	+	AGED_ADULT	0.58444	1.49946	19	9	P68103	Elongation factor 1-alpha 1	EEF1A1
26.8622	26.7197	26.8991	27.0823	26.81	26.8459	27.0918	26.9548	27.0275	26.8931	25.9243	26.0522	26.7098	26.7987	26.8213	26.8437	+	AGED_ADULT	-0.39364	0.761207	26	18	P68252	14-3-3 protein gamma	YWHAG
25.5917	25.5667	25.7906	25.761	25.496	25.4717	25.329	25.4898	25.4064	25.3158	24.9841	25.087	25.2887	25.2518	25.4026	25.3417	+	AGED_ADULT	-0.295878	0.814577	43	43	P79134	Annexin A6	ANXA6
24.8306	24.8193	24.6146	24.3608	24.8646	24.9767	24.7801	24.7562	24.9458	24.9017	24.8951	24.7326	25.2323	25.1017	25.2192	25.3863	+	AGED_ADULT	0.309492	1.23927	46	36	P79334	Glycogen phosphorylase, muscle form	PYGM
24.2898	24.3597	24.2917	23.9636	24.3067	24.2633	24.2084	24.3826	24.2967	24.4715	24.4357	24.5684	24.6795	24.722	24.3587	24.3988	+	AGED_ADULT	0.24381	1.18412	15	15	P80209	Cathepsin D	CTSD
23.6431	23.6082	24.0336	23.8396	23.5884	23.7515	23.4055	23.5916	23.2767	23.407	22.8261	22.5845	23.3811	23.5598	22.9485	22.99	+	AGED_ADULT	-0.566192	0.675397	18	16	P81125	Alpha-soluble NSF attachment protein	NAPA
25.0099	24.8618	25.0688	24.8707	25.0915	25.1173	24.6842	24.7597	25.0956	25.2118	25.7979	25.623	25.5453	25.3441	25.5597	25.5417	+	AGED_ADULT	0.591495	1.50681	24	24	P81287	Annexin A5	ANXA5
23.0744	22.8584	22.9288	22.8646	22.9123	22.8656	23.2567	23.1141	22.6096	22.8106	22.2254	22.5196	22.7525	22.728	22.7602	22.5854	+	AGED_ADULT	-0.33432	0.793158	5	5	Q00361	ATP synthase subunit e, mitochondrial	ATP5ME
24.125	24.1631	23.849	23.8497	24.0254	23.9402	24.2576	24.011	23.82	23.7095	22.7394	22.6731	23.8506	23.7678	23.5192	23.4464	+	AGED_ADULT	-0.642286	0.640697	7	7	Q01321	Cytochrome c oxidase subunit NDUFA4	NDUFA4
22.7595	22.8736	22.5984	22.8887	22.6509	22.4392	22.8628	22.7571	22.4396	22.5764	21.2466	21.0984	22.3482	22.6573	22.4992	22.4698	+	AGED_ADULT	-0.631374	0.645561	8	8	Q02369	NADH dehydrogenase [ubiquinone] 1 beta subcomplex subunit 9	NDUFB9
22.076	22.1791	21.8437	22.0573	21.8263	21.9218	22.0339	22.3564	21.7272	21.9133	21.0264	20.84	21.8737	21.8547	21.3439	21.815	+	AGED_ADULT	-0.534509	0.690394	5	5	Q02370	NADH dehydrogenase [ubiquinone] 1 alpha subcomplex subunit 2	NDUFA2
23.407	23.4748	23.4742	23.2684	23.3149	23.2784	23.5412	23.5237	23.2121	23.2656	22.5389	22.5661	23.2326	23.3635	23.2103	23.0406	+	AGED_ADULT	-0.384044	0.766287	11	11	Q02373	NADH dehydrogenase [ubiquinone] 1 beta subcomplex subunit 10	NDUFB10
22.6123	22.5301	22.5389	22.2656	22.2964	22.3831	22.6527	22.6723	22.2998	22.3019	20.2296	19.4468	22.109	21.8966	22.0274	21.9325	+	AGED_ADULT	-1.18165	0.440846	5	5	Q02827	NADH dehydrogenase [ubiquinone] 1 subunit C2	NDUFC2
25.5196	25.5138	24.964	25.1653	25.1096	25.021	25.7423	25.7012	25.3436	25.2972	24.8518	24.9657	24.7239	24.7199	25.1713	25.0837	+	AGED_ADULT	-0.418381	0.748264	22	21	Q04467	Isocitrate dehydrogenase [NADP], mitochondrial	IDH2
23.1397	23.2717	23.1575	23.263	23.2666	23.5568	23.6718	23.6804	23.8614	23.6293	22.331	21.1222	22.829	22.8863	22.7416	22.6693	+	AGED_ADULT	-1.01991	0.493147	21	21	Q06846	Rabphilin-3A	RPH3A
23.7345	23.6575	23.9894	23.9079	23.9068	23.8205	23.5871	23.705	23.8287	23.8382	23.3384	23.181	23.7582	23.81	23.4121	23.3665	+	AGED_ADULT	-0.319865	0.801145	17	17	Q07130	UTP--glucose-1-phosphate uridylyltransferase	UGP2
28.9209	28.9078	28.8879	29.0625	28.8852	28.8133	28.9524	28.9051	28.5508	28.5365	27.6512	27.6061	28.1631	28.2425	28.0571	28.1344	+	AGED_ADULT	-0.866499	0.548476	68	45	Q08DA1	Sodium/potassium-transporting ATPase subunit alpha-1	ATP1A1
27.079	27.0316	26.9808	26.9922	27.1662	27.1208	27.147	27.1369	27.1455	27.0805	26.1047	26.1754	27.036	27.1226	26.8136	26.7961	+	AGED_ADULT	-0.413309	0.750899	63	53	Q08DF4	Dynamin-1	DNM1
27.3676	27.4321	28.5063	28.5769	27.6425	27.6369	27.1835	27.1078	26.613	26.6103	25.7695	25.6665	26.645	26.6403	25.6309	25.6005	+	AGED_ADULT	-1.47555	0.359596	53	47	Q08DH7	Alpha-internexin	INA
23.8531	23.8896	23.8918	24.0748	24.0367	24.0816	24.216	24.1263	24.0284	24.1477	23.343	23.1135	24.0095	23.9829	23.9491	23.639	+	AGED_ADULT	-0.361768	0.77821	13	13	Q08DM7	Neuronal-specific septin-3	SEPTIN3
24.7555	24.747	25.3191	25.4134	25.0359	25.037	24.9135	24.7636	24.9011	24.8275	23.5591	23.6076	24.922	24.8589	24.4588	24.536	+	AGED_ADULT	-0.647624	0.638331	38	38	Q0IIM3	Heat shock protein 105 kDa	HSPH1
22.661	22.4428	22.3711	22.0799	22.5688	22.3257	22.9456	22.911	21.6359	21.8717	20.0528	20.9469	21.8515	21.5694	21.9384	18.9579	+	AGED_ADULT	-1.4952	0.354731	7	4	Q0V7N0	Vesicle-associated membrane protein 1	VAMP1
24.8068	24.7994	24.67	24.6836	24.7003	24.7977	24.981	24.9093	24.9021	24.7784	23.9808	23.8456	24.5638	24.6987	24.4834	24.5117	+	AGED_ADULT	-0.455531	0.729242	24	23	Q0VC68	Septin-5	SEPTIN5
21.8988	21.9636	22.1596	22.0099	21.5728	21.5981	22.1231	22.1493	21.2523	21.1697	20.5187	21.228	20.0106	19.7516	21.7735	20.2871	+	AGED_ADULT	-1.19481	0.436845	5	5	Q0VCG3	Parvalbumin alpha	PVALB
23.8695	23.9417	25.0758	25.3016	24.3578	24.4346	24.0306	23.7309	23.7349	23.7542	23.2984	23.2212	23.5616	23.6811	23.294	22.9923	+	AGED_ADULT	-0.881724	0.542719	21	16	Q0VCP4	Septin-8	SEPTIN8
22.4732	22.6569	22.2364	22.2388	22.7026	22.6232	22.6546	22.5344	22.3602	22.274	21.3573	21.5467	22.0068	22.0048	21.793	21.8093	+	AGED_ADULT	-0.722441	0.606071	7	7	Q0VCY0	Sarcoplasmic/endoplasmic reticulum calcium ATPase 1	ATP2A1
22.6734	22.6032	22.8278	23.1252	22.9784	22.5652	22.9335	22.6319	22.8507	22.7	22.0814	22.0001	22.8053	22.5924	22.5566	22.2527	+	AGED_ADULT	-0.407477	0.753941	10	9	Q0VCY1	Vesicle-associated membrane protein-associated protein A	VAPA
22.3504	22.4338	22.4539	22.5142	22.701	22.3879	22.2173	22.5838	22.5567	22.2954	20.7895	20.899	22.3921	22.0874	21.5087	21.9605	+	AGED_ADULT	-0.843233	0.557393	10	8	Q0VD34	Phytanoyl-CoA hydroxylase-interacting protein	PHYHIP
22.0545	22.1503	22.3958	22.7181	22.3004	22.2361	22.7359	22.6042	22.7789	22.8022	23.2647	23.0391	23.3716	23.2218	23.2801	23.0755	+	AGED_ADULT	0.731149	1.65996	10	10	Q148C9	Heme-binding protein 1	HEBP1
24.6042	24.7068	24.3329	24.359	24.2473	24.2674	24.4487	24.4865	24.4003	24.2273	23.7782	23.7428	24.298	24.188	24.201	24.0838	+	AGED_ADULT	-0.35942	0.779478	18	18	Q148D5	Succinate--CoA ligase [ADP-forming] subunit beta, mitochondrial	SUCLA2
22.1845	22.56	22.6878	22.6054	22.3095	22.2866	22.2135	22.0614	22.2065	22.2421	21.166	21.6126	21.9315	22.1603	21.7149	21.7428	+	AGED_ADULT	-0.614401	0.653201	12	9	Q148F1	Cofilin-2	CFL2
21.4167	21.5002	21.8802	22.242	21.5088	21.6917	21.8408	21.9092	21.3644	21.4801	21.0286	20.9976	21.4336	21.4318	20.9299	20.982	+	AGED_ADULT	-0.549492	0.683261	6	6	Q17QG2	Nuclear migration protein nudC	NUDC
26.6962	26.7065	26.8455	27.0665	26.5176	26.504	26.7899	26.9004	26.371	26.4098	25.7302	25.8025	26.5003	26.4925	26.3783	26.248	+	AGED_ADULT	-0.488778	0.712629	26	26	Q17QQ3	Synaptosomal-associated protein 25	SNAP25
25.6233	25.4582	26.4204	26.3654	25.97	25.9427	26.0013	25.9455	26.0215	26.1077	24.9942	25.1316	25.9092	25.9309	25.3406	25.587	+	AGED_ADULT	-0.503352	0.705466	25	25	Q27957	Tubulin polymerization-promoting protein	TPPP
24.1316	24.1569	24.4493	24.603	24.0441	24.0389	24.4793	24.4976	24.1682	24.3448	25.3862	25.4044	24.5357	24.4447	24.7709	24.6302	+	AGED_ADULT	0.570644	1.48519	33	20	Q27975	Heat shock 70 kDa protein 1A	HSPA1A
22.6833	22.8604	23.24	23.2202	22.8513	22.876	22.9856	22.9395	22.8083	23.1255	21.8127	22.4667	22.6792	22.6797	22.5128	22.5096	+	AGED_ADULT	-0.515589	0.699507	17	17	Q27974	Putative tyrosine-protein phosphatase auxilin	DNAJC6
28.7273	28.5843	29.3556	29.3216	29.1386	29.1142	28.9669	28.9299	28.9395	28.8738	29.5212	29.4988	29.6281	29.5618	29.7343	29.6846	+	AGED_ADULT	0.609633	1.52587	73	69	Q28115	Glial fibrillary acidic protein	GFAP
22.7244	22.6982	22.233	22.4354	22.3904	22.5776	22.7496	22.8783	22.1535	22.3139	21.961	22.1366	22.315	22.0762	22.2745	22.2895	+	AGED_ADULT	-0.339985	0.790049	13	13	Q29RK2	Pyruvate carboxylase, mitochondrial	PC
21.4922	21.2728	21.7636	21.686	21.5729	21.674	21.7097	21.484	21.3236	21.4045	21.183	20.9958	21.5236	21.5803	21.0453	21.0904	+	AGED_ADULT	-0.301923	0.81117	7	6	Q29RK4	UV excision repair protein RAD23 homolog B	RAD23B
19.5729	19.9801	20.0487	20.1744	19.6543	19.6462	20.5672	18.5697	20.3064	20.1373	21.6902	21.8018	20.6092	20.1111	20.8002	21.0604	+	AGED_ADULT	1.14641	2.21363	15	9	Q2HJ49	Moesin	MSN
20.2955	21.1719	20.7247	20.8293	20.6521	19.8915	20.8961	20.7107	20.4349	20.5452	22.7227	22.8656	20.8601	20.8424	22.416	21.2244	+	AGED_ADULT	1.20669	2.30807	8	8	Q2KJ32	Methanethiol oxidase	SELENBP1
21.0262	21.0876	21.1512	21.4159	20.9289	21.2913	21.3911	21.0558	20.7984	20.9493	20.3429	20.1931	20.8975	20.7559	21.0085	20.4863	+	AGED_ADULT	-0.495533	0.709299	9	9	Q2KJ56	Homer protein homolog 1	HOMER1
24.4536	24.4444	24.4704	24.205	24.5303	24.6246	24.418	24.5301	24.4748	24.3711	23.0486	22.9451	24.2898	24.1706	24.0036	24.1723	+	AGED_ADULT	-0.68057	0.623919	21	21	Q2KJ97	Neurochondrin	NCDN
22.65	22.6598	22.4889	22.6464	22.5987	22.4836	22.9599	22.7612	22.4915	22.5056	23.1873	23.2179	22.8143	22.8929	23.2033	23.1827	+	AGED_ADULT	0.458505	1.37412	11	11	Q2KJC9	Alpha-aminoadipic semialdehyde dehydrogenase	ALDH7A1
23.5762	23.5699	23.8842	23.8575	23.8774	23.7118	23.6367	23.6713	23.8967	23.7228	23.9414	24.0219	24.0296	24.0047	24.0476	23.7419	+	AGED_ADULT	0.224082	1.16803	16	16	Q2KJH4	WD repeat-containing protein 1	WDR1
21.4501	21.0197	21.3028	21.4517	21.5926	21.5166	21.7822	22.1461	20.9592	21.2728	19.1954	20.3176	20.899	20.976	21.3452	19.738	+	AGED_ADULT	-1.03749	0.487173	5	5	Q2KJJ8	5-3 exonuclease PLD3	PLD3
20.8541	20.8611	21.8488	21.672	21.2156	21.4833	21.072	20.9287	21.1793	21.3225	19.9866	20.6364	20.6381	20.7479	20.8107	20.7861	+	AGED_ADULT	-0.64275	0.640491	5	5	Q2T9S4	Glycerol-3-phosphate phosphatase	PGP
20.791	20.9047	21.6581	21.2746	21.3129	21.2373	21.0157	21.2172	20.9728	21.5248	20.1394	20.7981	19.5376	21.0868	20.67	21.0104	+	AGED_ADULT	-0.650522	0.63705	5	5	Q2TBQ8	6-phosphogluconolactonase	PGLS
19.2939	20.0008	18.8789	21.0298	19.9172	20.4689	19.647	18.8173	21.1544	21.9058	21.5362	20.217	21.9828	21.624	21.827	21.5737	+	AGED_ADULT	1.34873	2.54689	5	5	Q32L92	Calponin-3	CNN3
27.4155	27.3908	27.3984	27.4078	27.4551	27.5501	27.1558	27.238	27.3632	27.4105	26.7052	26.6974	27.2952	27.3176	27.1385	27.1262	+	AGED_ADULT	-0.331845	0.79452	30	30	Q32LG3	Malate dehydrogenase, mitochondrial	MDH2
21.2692	21.0441	21.9782	22.0648	21.6247	21.6007	21.2954	21.5291	21.0754	21.2375	20.8953	20.5769	21.2797	21.2334	20.7268	21.0045	+	AGED_ADULT	-0.519146	0.697785	7	7	Q32LM2	Small glutamine-rich tetratricopeptide repeat-containing protein alpha	SGTA
26.0332	26.1233	25.8566	26.2401	26.3375	26.2216	26.2689	26.1442	26.1417	26.2034	25.4247	25.3993	25.955	26.0465	25.846	25.7735	+	AGED_ADULT	-0.416236	0.749377	21	11	Q32PH8	Elongation factor 1-alpha 2	EEF1A2
25.6301	25.6358	25.3855	25.3147	25.4963	25.4777	25.633	25.5554	25.6387	25.6827	26.1479	26.2403	25.7874	25.7865	25.9221	26.0713	+	AGED_ADULT	0.447584	1.36375	53	33	Q3B7N2	Alpha-actinin-1	ACTN1
26.8906	26.7923	27.3614	27.1592	27.2423	27.0763	26.9784	26.9407	26.9602	27.0599	25.8321	25.8499	26.8721	26.9114	26.537	26.7506	+	AGED_ADULT	-0.587294	0.66559	28	23	Q3MHJ9	Calcium/calmodulin-dependent protein kinase type II subunit beta	CAMK2B
24.6208	24.7791	26.6027	25.7936	26.7888	25.2232	24.2938	24.3864	24.8163	24.7716	20.8892	23.9882	24.4554	24.0628	23.5308	23.3924	+	AGED_ADULT	-1.82115	0.282996	4	4	Q3MHK4	Claudin-11	CLDN11
28.5988	28.5915	29.1402	29.062	28.8823	28.9861	28.8838	28.8675	28.7111	28.7846	27.8146	27.8221	28.797	28.8365	28.5009	28.4371	+	AGED_ADULT	-0.482757	0.715609	42	2	Q3MHM5	Tubulin beta-4B chain	TUBB4B
22.3049	22.3228	22.6859	22.5182	22.5217	22.5929	22.4313	22.2448	22.3246	22.3751	21.5366	21.6952	22.3476	22.3037	22.2773	22.1301	+	AGED_ADULT	-0.383811	0.76641	7	7	Q3MHR7	Actin-related protein 2/3 complex subunit 2	ARPC2
22.9979	22.925	23.7143	23.4928	23.071	22.9923	22.8059	23.0767	23.392	23.2187	24.9216	24.9952	23.0485	23.1246	24.2342	24.2601	+	AGED_ADULT	0.928691	1.90355	10	10	Q3MHY1	Cysteine and glycine-rich protein 1	CSRP1
20.8913	21.1321	21.1401	20.3831	21.036	20.9301	20.8394	21.1117	21.1371	20.8357	19.933	20.7436	20.9303	18.9729	19.8955	18.6504	+	AGED_ADULT	-1.08936	0.469971	8	8	Q3SYZ4	Aspartate--tRNA ligase, cytoplasmic	DARS1
26.946	26.8576	27.2002	27.2684	26.9861	26.9018	27.0155	26.9349	27.1399	27.014	26.34	26.5121	26.8897	26.9378	26.7469	26.7509	+	AGED_ADULT	-0.330228	0.795411	22	22	Q3SZ62	Phosphoglycerate mutase 1	PGAM1
24.0892	23.9217	24.5392	24.4435	24.2084	24.2559	24.7883	24.6144	24.5482	24.4266	24.7385	24.8496	25.0656	25.2262	25.1483	25.0712	+	AGED_ADULT	0.633016	1.5508	9	9	Q3SZF0	Acyl-CoA-binding domain-containing protein 7	ACBD7
22.9245	23.003	23.1244	22.862	22.7187	22.9838	22.6269	22.7245	23.1283	23.0331	20.0896	20.7535	19.2227	19.8545	22.7458	20.2248	+	AGED_ADULT	-2.4311	0.185424	9	5	Q3SZF2	ADP-ribosylation factor 4	ARF4
19.9265	20.462	19.7549	20.3532	19.9683	19.7143	21.6269	21.7034	19.1787	20.1704	22.297	22.251	21.2375	21.2216	22.2991	22.4551	+	AGED_ADULT	1.67437	3.1918	7	7	Q3SZJ4	Prostaglandin reductase 1	PTGR1
22.1672	22.5878	22.5351	22.6299	22.7496	22.9151	23.0729	23.144	22.4084	22.3584	21.1461	21.4353	21.7342	21.9137	22.1171	21.7943	+	AGED_ADULT	-0.966712	0.511671	20	8	Q3SZN0	Septin-6	SEPTIN6
23.5388	23.6649	24.4884	24.375	24.0576	23.9803	23.8201	23.7158	23.6271	23.7095	22.8806	22.9875	23.781	23.8617	23.2166	23.0982	+	AGED_ADULT	-0.593486	0.66274	11	11	Q3SZP2	Microtubule-associated protein RP/EB family member 2	MAPRE2
26.6216	26.6972	26.742	26.813	26.864	26.8838	26.472	26.568	27.0265	26.8038	27.0451	26.8454	27.1078	27.1299	27.0784	26.9573	+	AGED_ADULT	0.278112	1.21261	20	20	Q3SZX4	Carbonic anhydrase 3	CA3
22.4166	22.5198	22.4658	22.2833	22.4138	22.4336	21.9638	22.3642	23.0813	22.2162	20.3582	20.5069	21.5611	21.6975	22.1399	22.4705	+	AGED_ADULT	-0.960159	0.514	8	8	Q3T067	Saccharopine dehydrogenase-like oxidoreductase	SCCPDH
27.3251	27.3857	27.4482	27.3841	27.3677	27.2301	27.2535	27.1741	27.1656	27.3221	26.4054	26.5464	27.0091	27.0192	26.8634	26.8534	+	AGED_ADULT	-0.522799	0.69602	26	26	Q3T145	Malate dehydrogenase, cytoplasmic	MDH1
25.3994	25.3974	25.3282	25.2733	25.4025	25.518	25.987	25.927	25.6823	25.6962	26.4921	26.4366	25.5818	25.6453	26.1332	26.0834	+	AGED_ADULT	0.50091	1.41511	22	22	Q3T149	Heat shock protein beta-1	HSPB1
21.1418	21.3546	21.031	20.826	21.2569	21.3329	21.6073	21.8497	21.4355	21.279	20.9464	19.4401	21.9978	19.2117	20.3626	19.5204	+	AGED_ADULT	-1.06495	0.477988	5	5	Q3T160	Nucleophosmin	NPM1
21.9866	21.8724	22.1779	21.9433	22.1133	22.1637	21.8556	22.1425	22.9192	22.7709	22.2561	22.6702	23.2126	22.9235	22.8812	22.8289	+	AGED_ADULT	0.600897	1.51666	5	5	Q3ZBD3	Pterin-4-alpha-carbinolamine dehydratase	PCBD1
25.2292	25.276	25.138	24.9431	25.2041	25.2582	25.237	25.2043	25.0541	25.0583	25.3171	25.2489	25.41	25.4304	25.2498	25.3063	+	AGED_ADULT	0.166847	1.1226	36	36	Q3ZBT1	Transitional endoplasmic reticulum ATPase	VCP
26.6029	27.0124	27.1769	26.9439	27.1502	27.0258	26.7607	26.7857	26.8749	26.6755	25.8419	25.8504	26.9333	26.9367	26.3057	26.3508	+	AGED_ADULT	-0.531099	0.692028	39	9	Q3ZBU7	Tubulin beta-4A chain	TUBB4A
18.8294	21.3551	21.0534	21.2688	21.2813	21.24	21.3459	19.1402	21.0928	21.0071	21.5756	21.6948	22.9508	22.8911	22.8617	22.6879	+	AGED_ADULT	1.68223	3.20923	9	9	Q3ZBY3	Calretinin	CALB2
25.1126	25.1498	25.6419	25.9341	25.1075	25.2908	25.1183	24.8654	25.3248	25.1647	23.7352	24.0242	25.0577	24.8728	24.8746	24.4544	+	AGED_ADULT	-0.767853	0.587291	11	4	Q3ZC09	Beta-enolase	ENO3
23.3392	23.1161	23.5071	23.5326	23.4003	23.4326	23.2867	23.1706	23.3309	23.4613	22.1221	21.9677	23.184	23.1893	22.8385	22.7629	+	AGED_ADULT	-0.68032	0.624027	18	18	Q58D72	Atlastin-1	ATL1
21.0444	21.1697	21.1152	21.252	20.7445	20.8408	21.4649	21.3811	21.1452	21.532	20.0563	19.3133	20.8645	19.8322	21.0084	20.8133	+	AGED_ADULT	-0.854323	0.553125	8	8	Q59HJ6	Lon protease homolog, mitochondrial	LONP1
21.7496	21.7643	21.2389	21.0116	21.8424	21.203	21.4271	21.9885	21.5796	21.8608	19.5401	19.9409	20.1248	19.5665	21.5284	21.5188	+	AGED_ADULT	-1.19669	0.436274	6	6	Q5E963	Actin-related protein 2/3 complex subunit 5-like protein	ARPC5L
27.4334	27.4206	27.4818	27.6696	27.5007	27.537	27.3705	27.4262	27.1769	27.4217	26.6863	26.698	27.0107	27.0939	27.3019	26.9918	+	AGED_ADULT	-0.480064	0.716946	28	24	Q5E9B1	L-lactate dehydrogenase B chain	LDHB
21.1481	21.2403	20.9851	20.9501	21.1078	21.2128	21.1284	21.3019	21.162	21.161	22.8831	23.1848	21.4337	21.3608	21.8007	21.6101	+	AGED_ADULT	0.905803	1.87359	9	8	Q5E9F5	Transgelin-2	TAGLN2
22.5836	22.6173	24.0631	24.6152	23.3924	22.6486	21.955	21.367	22.0848	22.565	21.8402	21.9336	21.6302	21.8972	21.246	21.072	+	AGED_ADULT	-1.18601	0.439517	11	11	Q5EA88	Glycerol-3-phosphate dehydrogenase [NAD(+)], cytoplasmic	GPD1
24.4249	24.4455	24.2995	24.2828	24.1028	24.0758	24.5268	24.6331	24.3535	24.4934	26.3081	26.4132	24.5766	24.5521	25.5899	25.4476	+	AGED_ADULT	1.11746	2.16964	31	13	Q5KR49	Tropomyosin alpha-1 chain	TPM1
26.0367	26.0907	26.4513	26.5839	26.2956	26.2384	26.365	26.1743	26.0636	26.0604	25.3509	25.4017	25.9072	25.9116	25.812	25.7175	+	AGED_ADULT	-0.552501	0.681837	34	34	Q6Q137	Septin-7	SEPTIN7
27.7276	27.7132	27.9743	27.9214	27.9435	27.9045	27.8945	27.8538	27.6878	27.6851	27.1374	27.0479	27.7105	27.7307	27.5242	27.3767	+	AGED_ADULT	-0.40934	0.752968	62	43	Q76LV2	Heat shock protein HSP 90-alpha	HSP90AA1
22.949	23.3825	22.9013	22.528	23.2648	22.9961	23.1471	23.1878	23.321	23.3515	23.3313	23.527	23.3306	23.6159	23.5559	23.6633	+	AGED_ADULT	0.401091	1.32051	9	9	Q9BGI1	Peroxiredoxin-5, mitochondrial	PRDX5
27.1712	27.1502	26.3413	26.1567	26.6144	26.5095	26.8387	26.9376	26.7505	26.7582	28.7254	28.691	27.3151	27.3448	27.0474	26.9949	+	AGED_ADULT	0.963584	1.95015	17	17	Q9BGI3	Peroxiredoxin-2	PRDX2
21.4258	21.4942	20.4791	21.3332	21.1938	22.0756	21.7124	21.494	22.5696	22.1923	23.6385	23.5746	22.1357	22.2694	23.6681	23.715	+	AGED_ADULT	1.5699	2.96884	12	12	Q9BH13	CD166 antigen	ALCAM
23.8902	23.9734	19.6803	19.9275	19.6787	20.7175	21.0196	22.1293	21.4549	21.6968	27.1644	27.3753	21.1049	20.8249	25.7132	25.7934	+	AGED_ADULT	3.24586	9.4864	16	16	Q9GKN8	Prolargin	PRELP
22.864	22.9575	23.1016	22.958	22.9308	22.9529	23.017	23.2542	23.2092	22.9858	22.4877	22.3185	22.7649	22.7906	22.7482	22.7	+	AGED_ADULT	-0.388122	0.764124	15	15	Q9GMB8	Serine--tRNA ligase, cytoplasmic	SARS1
22.7577	22.8375	22.9187	22.8541	22.9606	22.8199	22.7242	22.5403	22.706	22.5432	21.6732	21.7102	22.6367	22.6891	22.4453	22.5463	+	AGED_ADULT	-0.482725	0.715624	9	9	Q9N285	Mitochondrial carrier homolog 2	MTCH2
21.5539	21.8288	21.7146	22.4711	22.26	22.2859	22.377	22.4035	21.9431	21.9699	21.6133	21.5646	21.7381	21.9577	21.6651	21.4548	+	AGED_ADULT	-0.415185	0.749923	13	13	Q9TRY0	Peptidyl-prolyl cis-trans isomerase FKBP4	FKBP4
25.1524	25.1479	21.4267	21.7024	21.583	21.3436	24.9113	24.9753	24.4972	24.364	28.257	28.139	24.3911	24.4449	26.5586	26.6706	+	AGED_ADULT	2.89983	7.4634	23	23	Q9TS87	Transgelin	TAGLN
26.6175	26.5518	26.3643	26.3195	26.3237	26.2457	26.389	26.2652	26.5553	26.4919	25.495	25.416	26.0775	26.1156	26.0103	26.0729	+	AGED_ADULT	-0.54786	0.684034	23	23	Q9TTK8	Creatine kinase U-type, mitochondrial	CKMT1

## Sheet: sheet3_AG_AD FC significant
Protein Name	Gene	Uniprot Identifier	Log2 fold change	Fold change (FC)	Peptides	Unique peptides
Biglycan	BGN	P21809	3.51036	11.3953	18	18
Prolargin	PRELP	Q9GKN8	3.24586	9.4864	16	16
Transgelin	TAGLN	Q9TS87	2.89983	7.4634	23	23
Fibrinogen gamma-B chain	FGG	P12799	2.83853	7.1529	21	21
Desmin	DES	O62654	2.81565	7.04036	27	21
Vimentin	VIM	P48616	2.51683	5.72324	73	60
Cellular retinoic acid-binding protein 1	CRABP1	P62964	2.49794	5.64878	9	8
Annexin A2	ANXA2	P04272	2.38346	5.21787	23	23
Carbonic anhydrase 2	CA2	P00921	2.33283	5.03793	19	19
Aldehyde dehydrogenase 1A1	ALDH1A1	P48644	2.16888	4.49673	16	16
Transthyretin	TTR	O46375	2.00581	4.01614	8	8
Annexin A1	ANXA1	P46193	1.75354	3.37186	11	11
Conglutinin	CGN1	P23805	1.7281	3.31291	7	7
Calretinin	CALB2	Q3ZBY3	1.68223	3.20923	9	9
Prostaglandin reductase 1	PTGR1	Q3SZJ4	1.67437	3.1918	7	7
Aldehyde oxidase 1	AOX1	P48034	1.60767	3.0476	5	5
CD166 antigen	ALCAM	Q9BH13	1.5699	2.96884	12	12
Calponin-3	CNN3	Q32L92	1.34873	2.54689	5	5
Flavin reductase (NADPH)	BLVRB	P52556	1.30209	2.46586	14	14
Protein S100-A4	S100A4	P35466	1.21002	2.3134	9	9
Methanethiol oxidase	SELENBP1	Q2KJ32	1.20669	2.30807	8	8
Moesin	MSN	Q2HJ49	1.14641	2.21363	15	9
Catalase	CAT	P00432	1.14179	2.20655	21	21
Tropomyosin alpha-1 chain	TPM1	Q5KR49	1.11746	2.16964	31	13
Secretogranin-2	SCG2	P20616	1.116	2.16746	10	10
Myosin light polypeptide 6	MYL6	P60661	1.06938	2.09853	7	7
Myosin regulatory light chain 12B	MYL12B	A4IF97	1.01341	2.01868	8	8
Aquaporin-4	AQP4	O77750	0.964202	1.95098	7	7
Peroxiredoxin-2	PRDX2	Q9BGI3	0.963584	1.95015	17	17
Cysteine and glycine-rich protein 1	CSRP1	Q3MHY1	0.928691	1.90355	10	10
Transgelin-2	TAGLN2	Q5E9F5	0.905803	1.87359	9	8
Heme-binding protein 1	HEBP1	Q148C9	0.731149	1.65996	10	10
Acyl-CoA-binding domain-containing protein 7	ACBD7	Q3SZF0	0.633016	1.5508	9	9
Glial fibrillary acidic protein	GFAP	Q28115	0.609633	1.52587	73	69
Pterin-4-alpha-carbinolamine dehydratase	PCBD1	Q3ZBD3	0.600897	1.51666	5	5
Annexin A5	ANXA5	P81287	0.591495	1.50681	24	24
Elongation factor 1-alpha 1	EEF1A1	P68103	0.58444	1.49946	19	9
Heat shock 70 kDa protein 1A	HSPA1A	Q27975	0.570644	1.48519	33	20
NADH-cytochrome b5 reductase 3	CYB5R3	P07514	0.561597	1.4759	13	13
Delta-1-pyrroline-5-carboxylate dehydrogenase, mitochondrial	ALDH4A1	A7YWE4	0.51258	1.4266	5	5
Heat shock protein beta-1	HSPB1	Q3T149	0.50091	1.41511	22	22
Protein disulfide-isomerase	P4HB	P05307	0.494961	1.40928	13	13
Cytochrome c oxidase subunit 4 isoform 1, mitochondrial	COX4I1	P00423	-0.461848	0.726056	11	11
L-lactate dehydrogenase B chain	LDHB	Q5E9B1	-0.480064	0.716946	28	24
V-type proton ATPase subunit H	ATP6V1H	O46563	-0.482329	0.715821	14	14
Pyruvate dehydrogenase E1 component subunit alpha, somatic form, mitochondrial	PDHA1	A7MB35	-0.482544	0.715714	21	21
Mitochondrial carrier homolog 2	MTCH2	Q9N285	-0.482725	0.715624	9	9
Tubulin beta-4B chain	TUBB4B	Q3MHM5	-0.482757	0.715609	42	2
cAMP-dependent protein kinase catalytic subunit beta	PRKACB	P05131	-0.487495	0.713262	16	5
Synaptosomal-associated protein 25	SNAP25	Q17QQ3	-0.488778	0.712629	26	26
Adenosylhomocysteinase 3	AHCYL2	A6QLP2	-0.488891	0.712573	8	7
Platelet-activating factor acetylhydrolase IB subunit beta	PAFAH1B1	P43033	-0.488922	0.712558	11	11
NADH dehydrogenase [ubiquinone] 1 alpha subcomplex subunit 5	NDUFA5	P23935	-0.489079	0.71248	7	7
Isocitrate dehydrogenase [NAD] subunit alpha, mitochondrial	IDH3A	P41563	-0.492129	0.710975	18	18
Homer protein homolog 1	HOMER1	Q2KJ56	-0.495533	0.709299	9	9
Tripartite motif-containing protein 2	TRIM2	A4IF63	-0.500594	0.706816	21	21
Tubulin polymerization-promoting protein	TPPP	Q27957	-0.503352	0.705466	25	25
Putative tyrosine-protein phosphatase auxilin	DNAJC6	Q27974	-0.515589	0.699507	17	17
Small glutamine-rich tetratricopeptide repeat-containing protein alpha	SGTA	Q32LM2	-0.519146	0.697785	7	7
Superoxide dismutase [Mn], mitochondrial	SOD2	P41976	-0.520682	0.697042	10	10
Malate dehydrogenase, cytoplasmic	MDH1	Q3T145	-0.522799	0.69602	26	26
Elongation factor Tu, mitochondrial	TUFM	P49410	-0.527606	0.693705	25	25
Tubulin beta-4A chain	TUBB4A	Q3ZBU7	-0.531099	0.692028	39	9
NADH dehydrogenase [ubiquinone] 1 alpha subcomplex subunit 2	NDUFA2	Q02370	-0.534509	0.690394	5	5
Guanine nucleotide-binding protein G(s) subunit alpha isoforms short	GNAS	P04896	-0.546004	0.684915	13	12
Creatine kinase U-type, mitochondrial	CKMT1	Q9TTK8	-0.54786	0.684034	23	23
cAMP-dependent protein kinase type II-beta regulatory subunit	PRKAR2B	P31322	-0.547933	0.683999	16	13
Nuclear migration protein nudC	NUDC	Q17QG2	-0.549492	0.683261	6	6
Septin-7	SEPTIN7	Q6Q137	-0.552501	0.681837	34	34
Aspartate aminotransferase, cytoplasmic	GOT1	P33097	-0.561599	0.677551	35	35
Alpha-soluble NSF attachment protein	NAPA	P81125	-0.566192	0.675397	18	16
Calcium/calmodulin-dependent protein kinase type II subunit beta	CAMK2B	Q3MHJ9	-0.587294	0.66559	28	23
Ras-related protein Rab-6B	RAB6B	A6QR46	-0.588081	0.665227	8	8
ADP/ATP translocase 1	SLC25A4	P02722	-0.588223	0.665162	24	12
Microtubule-associated protein RP/EB family member 2	MAPRE2	Q3SZP2	-0.593486	0.66274	11	11
Glutamate dehydrogenase 1, mitochondrial	GLUD1	P00366	-0.606792	0.656655	31	31
Phosphate carrier protein, mitochondrial	SLC25A3	P12234	-0.611025	0.654731	19	19
Syntaxin-binding protein 1	STXBP1	P61763	-0.611698	0.654426	62	62
Cytochrome c oxidase subunit 6C	COX6C	P04038	-0.614132	0.653323	5	5
Cofilin-2	CFL2	Q148F1	-0.614401	0.653201	12	9
NADH dehydrogenase [ubiquinone] 1 beta subcomplex subunit 4	NDUFB4	P48305	-0.620722	0.650346	4	4
NADH dehydrogenase [ubiquinone] iron-sulfur protein 6, mitochondrial	NDUFS6	P23934	-0.622381	0.649598	7	7
NADH dehydrogenase [ubiquinone] 1 beta subcomplex subunit 9	NDUFB9	Q02369	-0.631374	0.645561	8	8
Mitochondrial 2-oxoglutarate/malate carrier protein	SLC25A11	P22292	-0.633737	0.644505	18	18
Syntaxin-1B	STX1B	P61267	-0.636041	0.643476	23	19
Cytochrome c oxidase subunit NDUFA4	NDUFA4	Q01321	-0.642286	0.640697	7	7
Glycerol-3-phosphate phosphatase	PGP	Q2T9S4	-0.64275	0.640491	5	5
Heat shock protein 105 kDa	HSPH1	Q0IIM3	-0.647624	0.638331	38	38
6-phosphogluconolactonase	PGLS	Q2TBQ8	-0.650522	0.63705	5	5
Atlastin-1	ATL1	Q58D72	-0.68032	0.624027	18	18
Neurochondrin	NCDN	Q2KJ97	-0.68057	0.623919	21	21
ADP/ATP translocase 3	SLC25A6	P32007	-0.684559	0.622196	23	8
Sterol carrier protein 2	SCP2	P07857	-0.701565	0.614905	5	5
Serine/threonine-protein phosphatase 2B catalytic subunit alpha isoform	PPP3CA	P48452	-0.721803	0.606339	26	26
Sarcoplasmic/endoplasmic reticulum calcium ATPase 1	ATP2A1	Q0VCY0	-0.722441	0.606071	7	7
1-phosphatidylinositol 4,5-bisphosphate phosphodiesterase beta-1	PLCB1	P10894	-0.735086	0.600782	28	28
Visinin-like protein 1	VSNL1	P62763	-0.740339	0.598598	20	18
Beta-enolase	ENO3	Q3ZC09	-0.767853	0.587291	11	4
Protein kinase C alpha type	PRKCA	P04409	-0.769736	0.586525	23	11
Glutathione S-transferase LANCL1	LANCL1	F1MVX2	-0.827036	0.563686	20	20
Phytanoyl-CoA hydroxylase-interacting protein	PHYHIP	Q0VD34	-0.843233	0.557393	10	8
Lon protease homolog, mitochondrial	LONP1	Q59HJ6	-0.854323	0.553125	8	8
Sodium/potassium-transporting ATPase subunit alpha-1	ATP1A1	Q08DA1	-0.866499	0.548476	68	45
Septin-8	SEPTIN8	Q0VCP4	-0.881724	0.542719	21	16
Saccharopine dehydrogenase-like oxidoreductase	SCCPDH	Q3T067	-0.960159	0.514	8	8
Septin-6	SEPTIN6	Q3SZN0	-0.966712	0.511671	20	8
Glycerophosphocholine choline phosphodiesterase ENPP6	ENPP6	F1N5C8	-0.988734	0.50392	8	8
Rabphilin-3A	RPH3A	Q06846	-1.01991	0.493147	21	21
5-3 exonuclease PLD3	PLD3	Q2KJJ8	-1.03749	0.487173	5	5
Cytochrome b-c1 complex subunit 8	UQCRQ	P13271	-1.0461	0.484275	7	7
Nucleophosmin	NPM1	Q3T160	-1.06495	0.477988	5	5
Aspartate--tRNA ligase, cytoplasmic	DARS1	Q3SYZ4	-1.08936	0.469971	8	8
NADH dehydrogenase [ubiquinone] 1 subunit C2	NDUFC2	Q02827	-1.18165	0.440846	5	5
Glycerol-3-phosphate dehydrogenase [NAD(+)], cytoplasmic	GPD1	Q5EA88	-1.18601	0.439517	11	11
Parvalbumin alpha	PVALB	Q0VCG3	-1.19481	0.436845	5	5
Actin-related protein 2/3 complex subunit 5-like protein	ARPC5L	Q5E963	-1.19669	0.436274	6	6
Protein kinase C beta type	PRKCB	P05126	-1.22673	0.427286	22	11
CD9 antigen	CD9	P30932	-1.40009	0.378906	6	6
2,3-cyclic-nucleotide 3-phosphodiesterase	CNP	P06623	-1.40605	0.377345	56	56
40S ribosomal protein SA	RPSA	P26452	-1.42214	0.373159	5	5
Alpha-internexin	INA	Q08DH7	-1.47555	0.359596	53	47
Myelin-oligodendrocyte glycoprotein	MOG	P55803	-1.49011	0.355986	17	17
Vesicle-associated membrane protein 1	VAMP1	Q0V7N0	-1.4952	0.354731	7	4
Neurogranin	NRGN	P35722	-1.54416	0.342895	5	5
Myelin basic protein	MBP	P02687	-1.76608	0.294007	30	30
Claudin-11	CLDN11	Q3MHK4	-1.82115	0.282996	4	4
Myelin proteolipid protein	PLP1	P04116	-1.90808	0.266447	15	15
Neurofilament light polypeptide	NEFL	P02548	-2.01432	0.247531	57	52
Neurofilament medium polypeptide	NEFM	O77788	-2.21022	0.216101	88	82
ADP-ribosylation factor 4	ARF4	Q3SZF2	-2.4311	0.185424	9	5
